# Supplementary material
Source: PubMed Central journal article supplement (PMC4213648)
Supplement: rspb20141761supp3.pdf [file rspb20141761supp3.pdf]

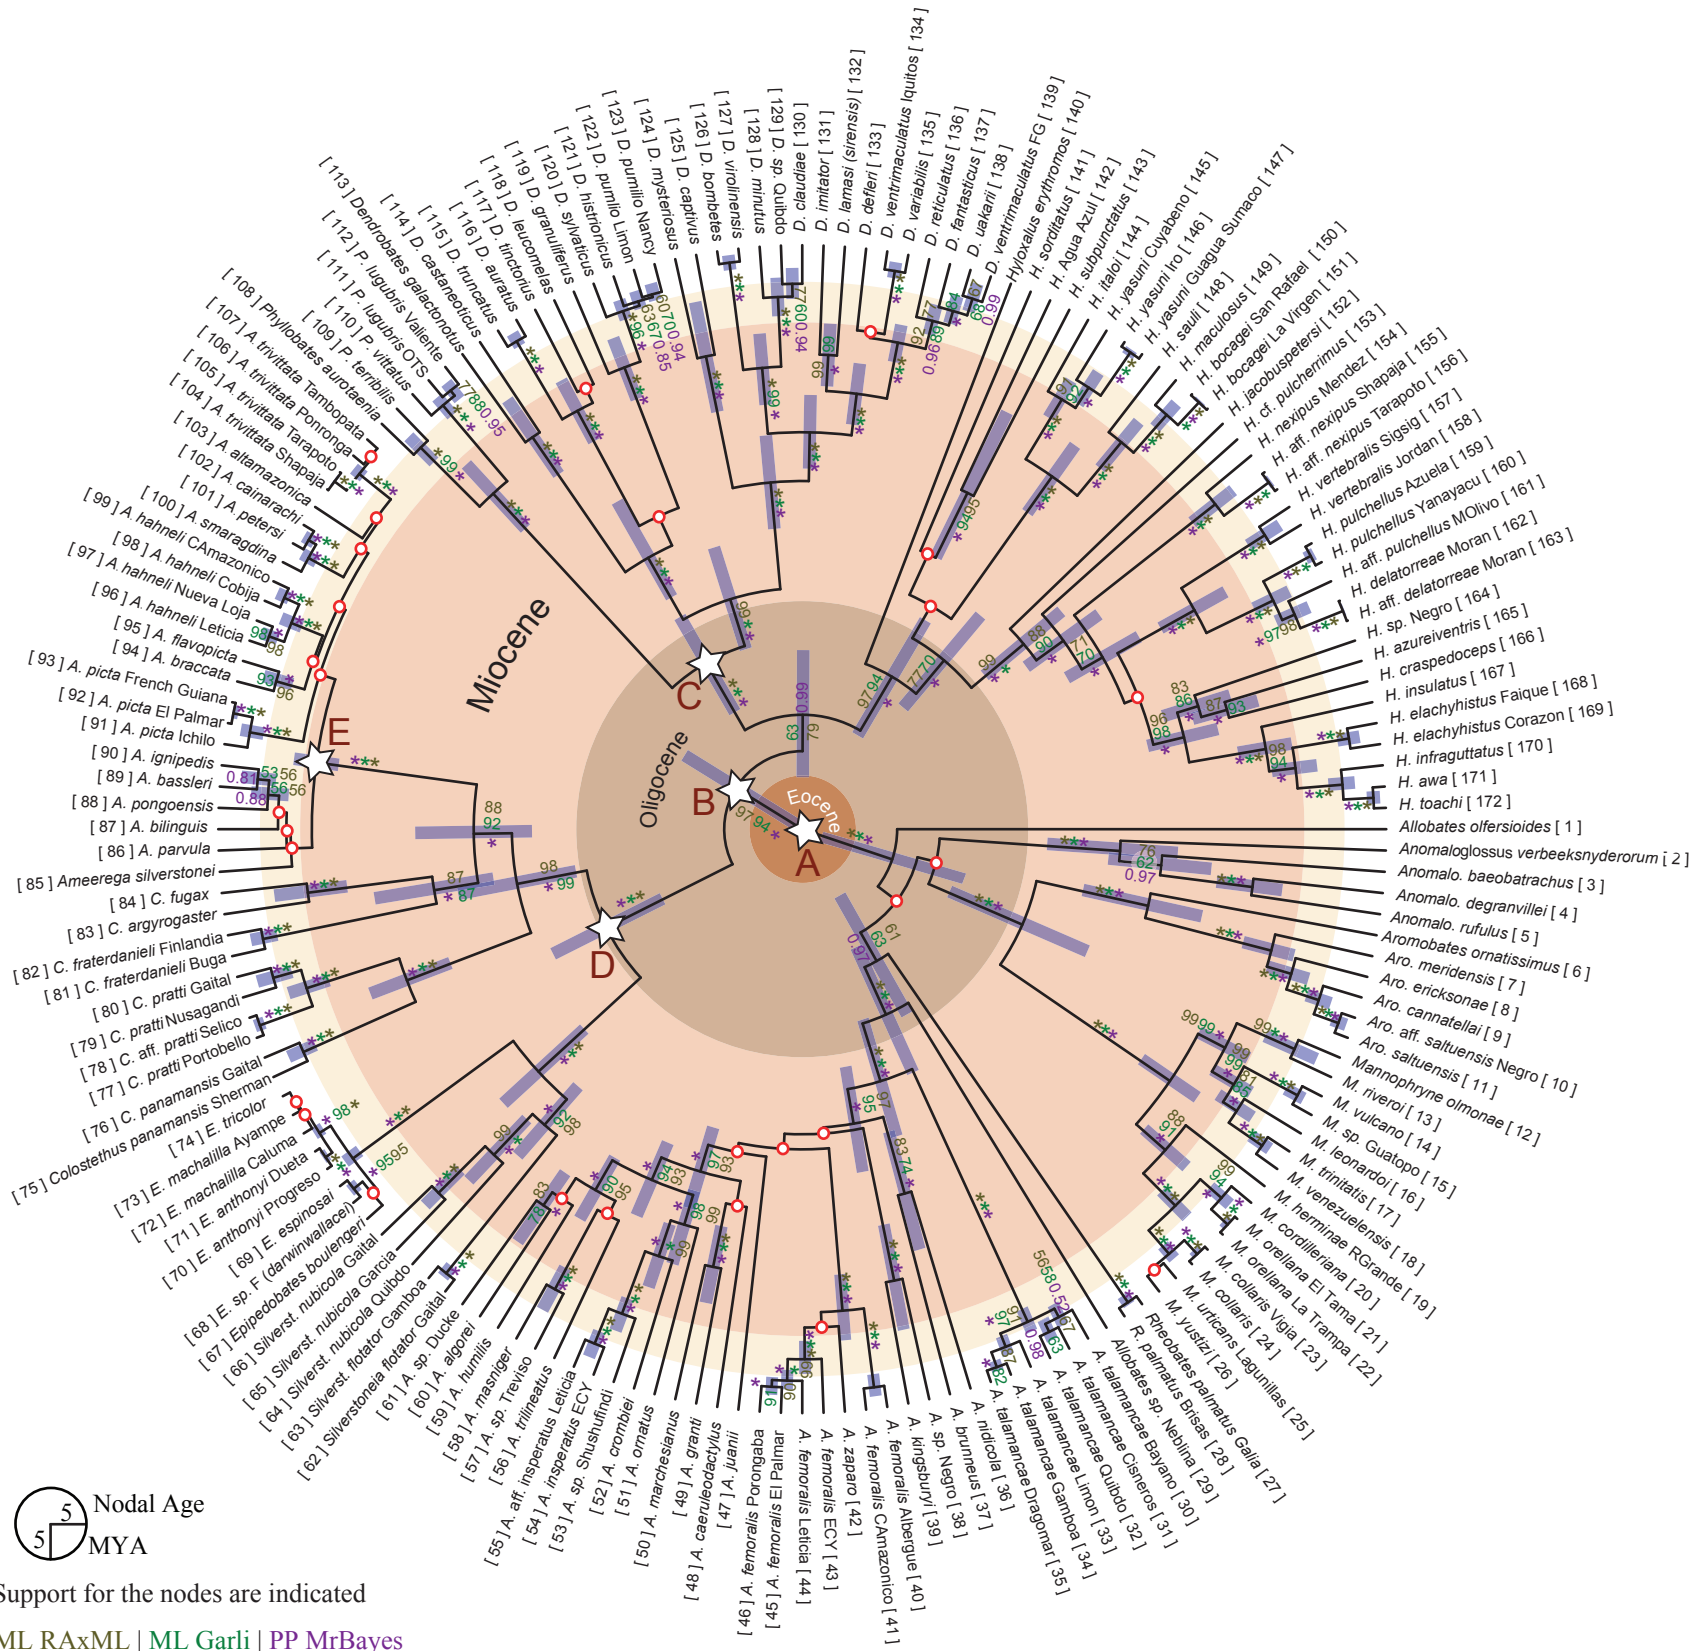

Supporting Figure S1. Chronogram, nodal support, and nodal age uncertainty of the Dendrobatidae (poison frog) Tree of Life. The chronogram shows nodal support under each different estimation method and node age uncertainty (blue bars). The species name and the phylogenetic identifier (Phy ID) number within square brackets are used in Tables S1– S3 and Dataset S1. Nodal support is given by non-parametric bootstrap proportions (ML-RAXML and ML-Garli) and Bayesian posterior probabilities (PP). The node-age calibration points are shown as open stars. These include (node A) crown node of Dendrobatidae (Mean = 38.1 ± 4.2 millions of years-MYA); (node B) the crown node of Dendrobatinae + Hyloxinae + Colostethinae (Mean = 31.6 ± 5.6 MYA); (node C) the crown node of Dendrobatinae (Mean = 24.1 ± 3.1 MYA); (node D) the crown node of Colostethinae (Mean = 27.1 ± 3.2 MYA); and (E) the crown node of *Ameerega* (Mean = 8.7 ± 1.9 MYA).

**A**

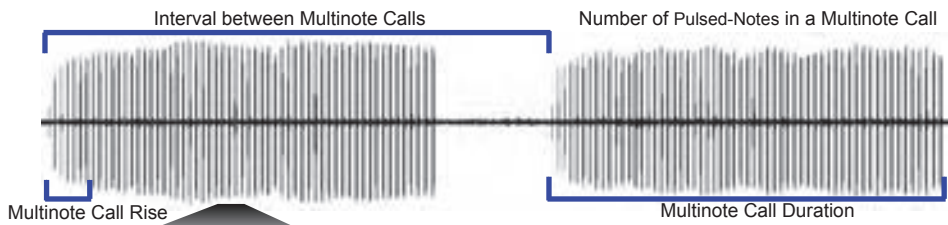

Multinode Call with a Single-Pulsed Unit of Repetition (UR)

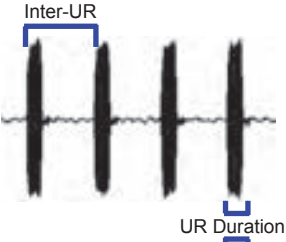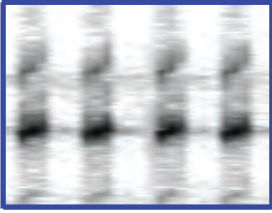

Double-Pulsed Unit of Repetition (UR)

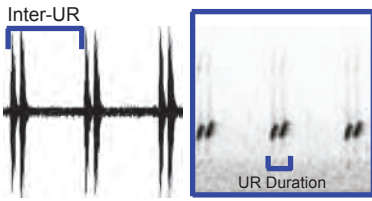

Three-Pulsed Unit of Repetition (UR)

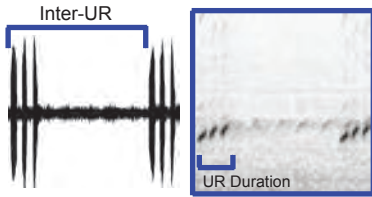

Four-Pulsed Unit of Repetition (UR)

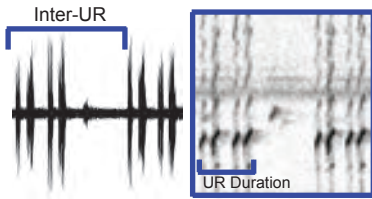

$$\text{Multinode Call Rate} = \frac{(\text{Number of Calls}) - 1}{\text{Time beginning of first bout to beginning of last call}}$$

$$\text{Pulsed-Calls Rate} = \frac{(\text{Number of Pulsed-Notes in a Call}) - 1}{\text{Time beginning of first call to beginning of last note}}$$

$$\text{UR Rate} = \frac{(\text{Number of URs}) - 1}{\text{Time beginning of first UR to beginning of last UR}}$$

**B**

Initial Pulse-Notes (Number)      Multinode Call or Bout of Single Pulsed-Calls

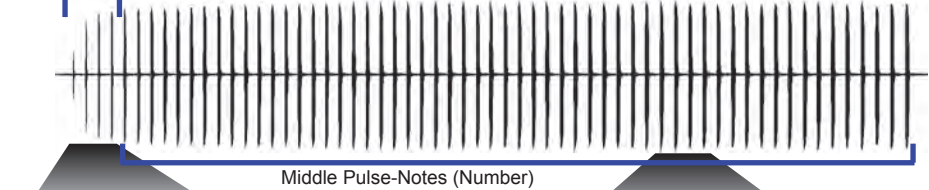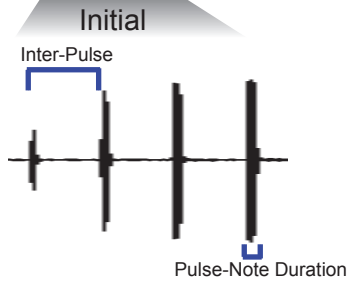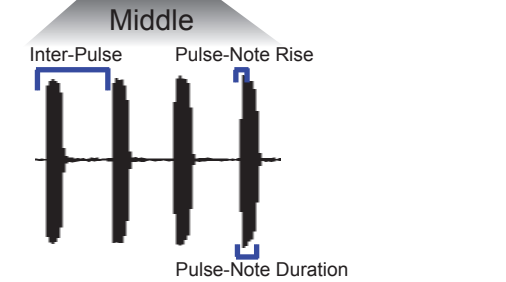

$$\text{Pulse-Note Rate} = \frac{(\text{Number of Pulse-Notes}) - 1}{\text{Time beginning of first pulse to beginning of last pulse}}$$

$$\text{Middle Pulse-Note Duty} = \text{Pulse-Note Duration} / \text{Inter-Pulse}$$

$$\text{Middle Pulse-Note Shape} = \text{Pulse-Note Rise} / \text{Pulse-Note Duration}$$

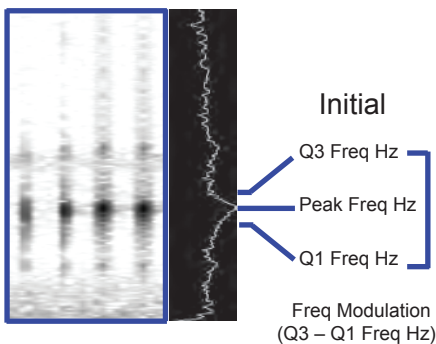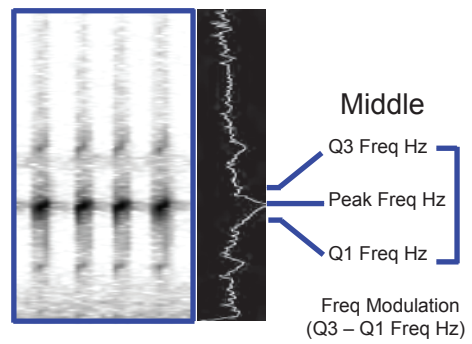

Supporting Figure S2. Definitions of call variables for (A) multinode calls and units of repetition (URs); and (B) single-note pulses (smallest acoustic units).
