# Supplementary material
Source: PubMed Central journal article supplement (PMC4213648)
Supplement: rspb20141761supp4.pdf [file rspb20141761supp4.pdf]

Table S1. Temporal, spectral, and scaling variables from calls of poison frogs including phylogeny identifier (Phy ID), locality, call behavior, habit, temperature, size, number of recordings, multinote call features, units of repetition (UR), initial pulse-note, and middle pulse-note parameters.

| Genus            | Species                        | Phy ID | Locality ID     | Latitude  | Longitude | Call Behavior | Habit       | Temp  | SVL (mm) |           |      | Analyzed recordings |
|------------------|--------------------------------|--------|-----------------|-----------|-----------|---------------|-------------|-------|----------|-----------|------|---------------------|
|                  |                                |        |                 |           |           |               |             | °C    | N        | $\bar{X}$ | SD   | N of ♂              |
| <i>Allobates</i> | <i>algorei</i>                 | 60     | El Tama         | 7.65375   | -72.19137 | concealed     | terrestrial | 23.50 | 8        | 18.90     | 0.70 | 3                   |
| <i>Allobates</i> | <i>brunneus</i>                | 37     | Guimaraes       | -15.2667  | -55.5311  | --            | terrestrial | 26.50 | 1        | 16.13     | 0.00 | 1                   |
| <i>Allobates</i> | <i>caeruleodactylus</i>        | 48     | Borba           | -4.398593 | -59.60251 | exposed       | terrestrial | 25.60 | 12       | 15.50     | 0.40 | 1                   |
| <i>Allobates</i> | <i>crombiei</i>                | 52     | Altamira        | -3.65     | -52.38    | concealed     | terrestrial | 24.10 | 2        | 18.10     | 0.04 | 2                   |
| <i>Allobates</i> | <i>femorialis</i>              | 43     | ECY             | -0.633    | -76.5     | concealed     | terrestrial | 25.60 | 20       | 23.58     | 1.27 | 6                   |
| <i>Allobates</i> | <i>femorialis</i>              | 46     | Porongaba       | -8.67     | -72.78    | exposed       | terrestrial | 25.00 | 1        | 25.38     | 0.00 | 1                   |
| <i>Allobates</i> | <i>femorialis</i>              | 44     | Leticia         | -4.2153   | -69.9406  | exposed       | terrestrial | 25.50 | 1        | 20.90     | 0.00 | 1                   |
| <i>Allobates</i> | <i>femorialis</i>              | 40     | Albergue        | -12.8773  | -71.3865  | exposed       | terrestrial | 26.00 | 6        | 21.98     | 2.18 | 1                   |
| <i>Allobates</i> | <i>femorialis</i>              | 41     | CAmazonico      | -12.6     | -70.08    | exposed       | terrestrial | 26.00 | 12       | 22.43     | 1.06 | 4                   |
| <i>Allobates</i> | <i>femorialis</i>              | 45     | El Palmar       | 8.333333  | -61.66667 | concealed     | terrestrial | 24.00 | 27       | 25.50     | 0.76 | 1                   |
| <i>Allobates</i> | <i>granti</i>                  | 49     | FG              | 3.62      | -53.17    | exposed       | terrestrial | 24.60 | 8        | 16.15     | 0.55 | 1                   |
| <i>Allobates</i> | <i>humilis</i>                 | 59     | San Ramon       | 8.8678    | -70.4861  | concealed     | terrestrial | 19.50 | --       | 21.80     | --   | 1                   |
| <i>Allobates</i> | <i>insperatus</i>              | 54     | ECY             | -0.633    | -76.4005  | exposed       | terrestrial | 24.60 | 18       | 16.64     | 0.93 | 7                   |
| <i>Allobates</i> | <i>aff. insperatus</i>         | 55     | Leticia         | -4.2153   | -69.9406  | exposed       | terrestrial | 25.50 | 1        | 18.57     | 0.00 | 1                   |
| <i>Allobates</i> | <i>juanii</i>                  | 47     | Restrepo        | 4.1903    | -73.603   | concealed     | terrestrial | 24.00 | 3        | 18.50     | 0.22 | 4                   |
| <i>Allobates</i> | <i>kingsburyi</i>              | 39     | Panguintza      | -3.8986   | -78.8125  | concealed     | terrestrial | 21.70 | 16       | 20.02     | 0.93 | 3                   |
| <i>Allobates</i> | <i>marchesianus</i>            | 50     | Taracua         | 0.1322    | -68.5508  | exposed       | terrestrial | 25.55 | 18       | 15.80     | 0.50 | 1                   |
| <i>Allobates</i> | <i>masniger</i>                | 58     | Itaituba        | -4.439444 | -56.84028 | --            | terrestrial | 24.10 | 2        | 18.59     | 0.09 | 2                   |
| <i>Allobates</i> | <i>nidicola</i>                | 36     | Castanho        | -3.6194   | -59.1455  | exposed       | terrestrial | 26.50 | 20       | 19.60     | 0.60 | 1                   |
| <i>Allobates</i> | <i>olfersoides</i>             | 1      | Teresopolis     | -22.4333  | -42.9833  | exposed       | terrestrial | 18.00 | 1        | 16.15     | 0.00 | 1                   |
| <i>Allobates</i> | <i>ornatus</i>                 | 51     | Tarapoto        | -6.47889  | -76.5125  | concealed     | terrestrial | 24.90 | 7        | 16.92     | 0.87 | 2                   |
| <i>Allobates</i> | <i>sp. Ducke</i>               | 61     | Ducke           | -2.933    | -59.95    | exposed       | terrestrial | 27.75 | 2        | 15.15     | 0.45 | 2                   |
| <i>Allobates</i> | <i>sp. Neblina</i>             | 29     | Neblina         | 0.833     | -66.167   | --            | terrestrial | 27.80 | --       | --        | --   | 1                   |
| <i>Allobates</i> | <i>sp. Negro</i>               | 38     | Rio Negro       | -2.7454   | -78.3034  | exposed       | terrestrial | 24.30 | 6        | 19.88     | 1.90 | 2                   |
| <i>Allobates</i> | <i>sp. Shushufindi</i>         | 53     | Shushufindi     | -0.25     | -76.43333 | exposed       | terrestrial | 25.00 | 2        | 16.39     | 0.43 | 1                   |
| <i>Allobates</i> | <i>sp. Treviso (sp. small)</i> | 57     | Treviso         | -3.15     | -54.83    | --            | terrestrial | 25.00 | 1        | 14.39     | 0.00 | 1                   |
| <i>Allobates</i> | <i>talamancae</i>              | 34     | Gamboia         | 9.14778   | -79.72997 | exposed       | terrestrial | 25.55 | 1        | 20.33     | 0.00 | 1                   |
| <i>Allobates</i> | <i>talamancae</i>              | 32     | Quibdo          | 5.728     | -76.591   | concealed     | terrestrial | 26.00 | 1        | 21.00     | 0.00 | 1                   |
| <i>Allobates</i> | <i>talamancae</i>              | 35     | Dragomar        | 9.42479   | -82.32038 | exposed       | terrestrial | 26.30 | 3        | 20.94     | 1.03 | 2                   |
| <i>Allobates</i> | <i>talamancae</i>              | 31     | Cisneros        | 3.823056  | -76.78444 | --            | terrestrial | 29.00 | 71       | 20.23     | 1.35 | 1                   |
| <i>Allobates</i> | <i>talamancae</i>              | 33     | Limon           | 9.962714  | -83.06584 | exposed       | terrestrial | 26.00 | 71       | 20.23     | 1.35 | 2                   |
| <i>Allobates</i> | <i>talamancae</i>              | 30     | Bayano          | 9.1333    | -78.5833  | exposed       | terrestrial | 21.20 | 1        | 18.95     | 0.00 | 1                   |
| <i>Allobates</i> | <i>trilineatus</i>             | 56     | Cusco Amazonico | -12.6     | -70.08    | exposed       | terrestrial | 26.00 | 24       | 15.20     | 1.73 | 2                   |
| <i>Allobates</i> | <i>zaparo</i>                  | 42     | Santiago        | -3.0383   | -78.0408  | concealed     | terrestrial | 25.80 | 22       | 25.37     | 1.52 | 3                   |
| <i>Ameerega</i>  | <i>altamazonica</i>            | 103    | Tarapoto        | -6.47889  | -76.5125  | exposed       | terrestrial | 25.60 | 9        | 22.46     | 0.84 | 2                   |

Table S1 (Cont.) Temporal, spectral, and scaling variables from calls of poison frogs including phylogeny identifier (Phy ID), locality, call behavior, habit, temperature, size, number of recordings, multinote call features, units of repetition (UR), initial pulse-note, and middle pulse-note parameters.

| Genus                 | Species                  | Phy ID | Locality ID     | Latitude  | Longitude | Call Behavior | Habit       | Temp  | SVL (mm) |           |      | Analyzed recordings |
|-----------------------|--------------------------|--------|-----------------|-----------|-----------|---------------|-------------|-------|----------|-----------|------|---------------------|
|                       |                          |        |                 |           |           |               |             | °C    | N        | $\bar{X}$ | SD   | N of ♂              |
| <i>Ameerega</i>       | <i>bassleri</i>          | 89     | Chazuta         | -6.574166 | -76.13667 | concealed     | terrestrial | 25.50 | 3        | 35.51     | 1.27 | 2                   |
| <i>Ameerega</i>       | <i>bilinguis</i>         | 87     | ECY             | -0.633    | -76.5     | exposed       | terrestrial | 25.60 | 27       | 19.63     | 0.68 | 4                   |
| <i>Ameerega</i>       | <i>braccata</i>          | 94     | Guimaraes       | -15.4     | -55.83    | exposed       | terrestrial | 24.50 | 1        | 22.40     | 0.00 | 1                   |
| <i>Ameerega</i>       | <i>cainarachi</i>        | 102    | Chazuta         | -6.574166 | -76.13667 | exposed       | terrestrial | 25.00 | 4        | 24.48     | 2.28 | 1                   |
| <i>Ameerega</i>       | <i>flavopicta</i>        | 95     | PESCAN          | -17.7691  | -48.6608  | exposed       | terrestrial | 22.70 | 11       | 26.60     | --   | 1                   |
| <i>Ameerega</i>       | <i>hahneli</i>           | 96     | Leticia         | -3.842332 | -73.36121 | concealed     | terrestrial | 24.00 | 19       | 19.80     | --   | 1                   |
| <i>Ameerega</i>       | <i>hahneli</i>           | 97     | Nueva Loja      | -0.633    | -76.5     | concealed     | terrestrial | 25.20 | 3        | 19.62     | 0.11 | 1                   |
| <i>Ameerega</i>       | <i>hahneli</i>           | 98     | Cobija          | -11.03333 | -68.79043 | --            | terrestrial | 26.90 | 1        | 20.00     | 0.00 | 1                   |
| <i>Ameerega</i>       | <i>hahneli</i>           | 99     | Cusco Amazonico | -12.6     | -70.08    | exposed       | terrestrial | 27.00 | 8        | 18.08     | 1.49 | 2                   |
| <i>Ameerega</i>       | <i>ignipedis</i>         | 90     | La Union        | -7.1987   | -74.9598  | --            | terrestrial | 24.00 | 7        | 22.40     | --   | 1                   |
| <i>Ameerega</i>       | <i>parvula</i>           | 86     | Macas           | -2.1438   | -78.03594 | exposed       | terrestrial | 22.00 | 20       | 21.22     | 1.07 | 2                   |
| <i>Ameerega</i>       | <i>petersi</i>           | 101    | Tingo Maria     | -9.192587 | -75.89347 | --            | terrestrial | 24.50 | 6        | 25.50     | 0.39 | 1                   |
| <i>Ameerega</i>       | <i>picta</i>             | 91     | Ichilo          | -16.90724 | -64.12351 | --            | terrestrial | 23.30 | 1        | 22.00     | 0.00 | 1                   |
| <i>Ameerega</i>       | <i>picta</i>             | 92     | El Palmar       | 8.33333   | -61.66667 | exposed       | terrestrial | 26.00 | 16       | 25.60     | --   | 2                   |
| <i>Ameerega</i>       | <i>picta</i>             | 93     | FG              | 3.98      | -52.58    | --            | terrestrial | 25.40 | 16       | 25.60     | --   | 1                   |
| <i>Ameerega</i>       | <i>pongoensis</i>        | 88     | Callehuacana    | -6.5      | -75.9     | --            | terrestrial | 21.00 | 5        | 22.90     | --   | 1                   |
| <i>Ameerega</i>       | <i>silverstonei</i>      | 85     | Tingo Maria     | -9.1      | -75.8     | concealed     | terrestrial | 18.50 | 17       | 35.85     | 3.47 | 1                   |
| <i>Ameerega</i>       | <i>smaragdina</i>        | 100    | Iscozacin       | -10.24898 | -75.22558 | --            | terrestrial | 24.50 | 2        | 26.50     | --   | 1                   |
| <i>Ameerega</i>       | <i>trivittata</i>        | 105    | Tarapoto        | -6.41689  | -76.29353 | exposed       | terrestrial | 21.00 | 5        | 38.86     | 1.41 | 3                   |
| <i>Ameerega</i>       | <i>trivittata</i>        | 107    | Tambopata       | -13.1481  | -69.6172  | exposed       | terrestrial | 22.00 | 1        | 37.00     | 0.00 | 1                   |
| <i>Ameerega</i>       | <i>trivittata</i>        | 106    | Porongaba       | -8.6667   | -72.7833  | exposed       | terrestrial | 27.00 | 79       | 37.40     | 2.26 | 4                   |
| <i>Ameerega</i>       | <i>trivittata</i>        | 104    | Chazuta         | -6.6      | -76.2833  | exposed       | terrestrial | 28.80 | 4        | 38.75     | 1.71 | 1                   |
| <i>Anomaloglossus</i> | <i>baeobatrachus</i>     | 3      | FG              | 3.75      | -53.48    | --            | terrestrial | 24.80 | --       | 16.50     | --   | 1                   |
| <i>Anomaloglossus</i> | <i>degranvillei</i>      | 4      | FG              | 3.57      | -53.92    | --            | terrestrial | 25.00 | 30       | 17.30     | 2.00 | 1                   |
| <i>Anomaloglossus</i> | <i>rufulus</i>           | 5      | Chimanta        | 5.3       | -62.1667  | concealed     | terrestrial | 17.50 | --       | 21.10     | 0.90 | 1                   |
| <i>Anomaloglossus</i> | <i>verbeeksnyderorum</i> | 2      | Tobogan         | 5.410917  | -67.61967 | concealed     | terrestrial | 24.50 | 4        | 18.80     | 0.70 | 4                   |
| <i>Aromobates</i>     | <i>meridensis</i>        | 7      | El Cedral       | 8.65      | -71.43    | concealed     | riparian    | 19.00 | 5        | 27.80     | 3.30 | 1                   |
| <i>Aromobates</i>     | <i>saltuensis</i>        | 11     | San Felix       | 8.0736    | -72.22933 | concealed     | riparian    | 22.50 | 4        | 23.13     | 0.41 | 3                   |
| <i>Aromobates</i>     | <i>cannatellai</i>       | 9      | Escalera        | 8.003083  | -71.7316  | concealed     | riparian    | 21.40 | 2        | 19.10     | 0.06 | 2                   |
| <i>Aromobates</i>     | aff. <i>saltuensis</i>   | 10     | El Tama         | 7.578717  | -72.17898 | concealed     | riparian    | 22.60 | 1        | 22.48     | 0.00 | 2                   |
| <i>Aromobates</i>     | <i>ericksonae</i>        | 8      | Los Ranchos     | 8.39889   | -71.68007 | exposed       | riparian    | 23.50 | 4        | 23.11     | 0.58 | 2                   |
| <i>Aromobates</i>     | <i>ornatissimus</i>      | 6      | Carache         | 9.6964    | -70.14    | concealed     | riparian    | 19.00 | 5        | 22.00     | 2.10 | 1                   |
| <i>Colostethus</i>    | <i>argyrogaster</i>      | 83     | San Jose        | -6.45043  | -76.31758 | exposed       | terrestrial | 23.00 | 6        | 19.96     | 0.65 | 1                   |
| <i>Colostethus</i>    | <i>fraterdanieli</i>     | 81     | Buga            | 3.876     | -76.435   | exposed       | terrestrial | 19.20 | 1        | 23.07     | 0.00 | 1                   |
| <i>Colostethus</i>    | <i>fraterdanieli</i>     | 82     | Finlandia       | 4.689778  | -75.63525 | exposed       | terrestrial | 22.00 | 3        | 22.38     | 0.70 | 3                   |

Table S1 (Cont.) Temporal, spectral, and scaling variables from calls of poison frogs including phylogeny identifier (Phy ID), locality, call behavior, habit, temperature, size, number of recordings, multinote call features, units of repetition (UR), initial pulse-note, and middle pulse-note parameters.

| Genus               | Species                  | Phy ID | Locality ID   | Latitude  | Longitude | Call Behavior | Habit       | Temp  | SVL (mm) |           |      | Analyzed recordings |
|---------------------|--------------------------|--------|---------------|-----------|-----------|---------------|-------------|-------|----------|-----------|------|---------------------|
|                     |                          |        |               |           |           |               |             | °C    | N        | $\bar{X}$ | SD   | N of ♂              |
| <i>Colostethus</i>  | <i>fugax</i>             | 84     | Yaupi         | -2.976401 | -77.86257 | exposed       | terrestrial | 27.10 | 7        | 19.75     | 1.23 | 5                   |
| <i>Colostethus</i>  | <i>panamansis</i>        | 76     | El Gaital     | 8.62873   | -80.11603 | exposed       | terrestrial | 21.20 | 5        | 24.06     | 2.79 | 6                   |
| <i>Colostethus</i>  | <i>panamansis</i>        | 75     | Sherman       | 9.28016   | -79.9154  | exposed       | terrestrial | 24.40 | 2        | 22.35     | 0.98 | 4                   |
| <i>Colostethus</i>  | <i>pratti</i>            | 80     | El Gaital     | 8.62873   | -80.11603 | exposed       | terrestrial | 21.60 | 1        | 21.52     | 0.00 | 3                   |
| <i>Colostethus</i>  | <i>pratti</i>            | 79     | Nusagandi     | 9.2994    | -78.98692 | exposed       | terrestrial | 25.10 | 1        | 19.85     | 0.00 | 1                   |
| <i>Colostethus</i>  | <i>pratti</i>            | 77     | Portobello    | 9.52823   | -79.65555 | exposed       | terrestrial | 27.50 | 1        | 21.41     | 0.00 | 2                   |
| <i>Colostethus</i>  | aff. <i>pratti</i>       | 78     | Selico Creek  | 9.0667    | -82.2833  | exposed       | terrestrial | 24.40 | 1        | 19.27     | 0.00 | 2                   |
| <i>Dendrobates</i>  | <i>auratus</i>           | 116    | BCI           | 9.1543    | -79.8461  | concealed     | terrestrial | 23.00 | 32       | 29.42     | 1.38 | 1                   |
| <i>Dendrobates</i>  | <i>bombetes</i>          | 126    | Buga          | 3.876     | -76.435   | exposed       | terrestrial | 20.20 | 6        | 18.19     | 0.87 | 4                   |
| <i>Dendrobates</i>  | <i>captivus</i>          | 125    | Panguintza    | -3.8986   | -78.8125  | concealed     | terrestrial | 21.70 | 1        | 16.82     | 0.00 | 2                   |
| <i>Dendrobates</i>  | <i>castaneoticus</i>     | 114    | Captive risen | -3.3667   | -51.85    | --            | terrestrial | 25.50 | 9        | 19.32     | 0.77 | 1                   |
| <i>Dendrobates</i>  | <i>claudiae</i>          | 130    | Dragomar      | 9.42479   | -82.32038 | exposed       | terrestrial | 26.30 | 1        | 13.61     | 0.00 | 1                   |
| <i>Dendrobates</i>  | <i>defleri</i>           | 133    | Taraira       | -1.0771   | -69.5143  | --            | terrestrial | 26.00 | 1        | 16.90     | 0.00 | 1                   |
| <i>Dendrobates</i>  | <i>fantasticus</i>       | 137    | Iquitos       | -3.842332 | -73.36121 | --            | terrestrial | 24.00 | 1        | 19.50     | 0.00 | 1                   |
| <i>Dendrobates</i>  | <i>galactonotus</i>      | 113    | Captive risen | -0.8      | -48.13333 | --            | terrestrial | 27.00 | 7        | 33.20     | 1.84 | 1                   |
| <i>Dendrobates</i>  | <i>granuliferus</i>      | 119    | Sirena        | 8.480009  | -83.58939 | exposed       | terrestrial | 28.00 | 2        | 20.24     | 0.29 | 1                   |
| <i>Dendrobates</i>  | <i>histrionicus</i>      | 121    | Quibdo        | 5.728     | -76.591   | exposed       | terrestrial | 27.60 | 1        | 37.15     | 0.00 | 3                   |
| <i>Dendrobates</i>  | <i>imitator</i>          | 131    | Tarapoto      | -6.43066  | -76.29034 | concealed     | terrestrial | 22.00 | 6        | 17.92     | 0.81 | 3                   |
| <i>Dendrobates</i>  | <i>lamasi (sirensis)</i> | 132    | Tambopata     | -7.1854   | -74.9536  | exposed       | terrestrial | 23.00 | 6        | 17.00     | 0.48 | 1                   |
| <i>Dendrobates</i>  | <i>leucomelas</i>        | 118    | Tobogan       | 5.410917  | -67.61967 | exposed       | terrestrial | 25.40 | 2        | 30.99     | 0.31 | 4                   |
| <i>Dendrobates</i>  | <i>minutus</i>           | 128    | BCI           | 9.1543    | -79.8461  | exposed       | terrestrial | 23.00 | 50       | 13.20     | 0.73 | 1                   |
| <i>Dendrobates</i>  | <i>mysteriosus</i>       | 124    | Yunga         | -5.374104 | -78.5805  | concealed     | terrestrial | 23.50 | 11       | 27.05     | 1.25 | 2                   |
| <i>Dendrobates</i>  | <i>pumilio</i>           | 123    | Cayo Nancy    | 9.33182   | -82.21667 | exposed       | terrestrial | 24.50 | 1        | 16.65     | 0.00 | 2                   |
| <i>Dendrobates</i>  | <i>pumilio</i>           | 122    | Limon         | 9.96633   | -83.03539 | exposed       | terrestrial | 22.00 | 40       | 21.60     | 0.80 | 1                   |
| <i>Dendrobates</i>  | <i>reticulatus</i>       | 136    | Iquitos       | -3.842332 | -73.36121 | exposed       | terrestrial | 29.30 | 24       | 14.37     | 0.07 | 1                   |
| <i>Dendrobates</i>  | sp. Quibdo               | 129    | Quibdo        | 5.728     | -76.591   | concealed     | terrestrial | 28.00 | 1        | 12.29     | 0.00 | 5                   |
| <i>Dendrobates</i>  | <i>sylvaticus</i>        | 120    | Puerto Quito  | 0.102073  | -79.28292 | exposed       | terrestrial | 32.00 | 1        | 28.35     | 0.00 | 2                   |
| <i>Dendrobates</i>  | <i>tinctorius</i>        | 117    | FG            | 4.08      | -52.68    | concealed     | terrestrial | 25.40 | 21       | 30.10     | 2.40 | 1                   |
| <i>Dendrobates</i>  | <i>truncatus</i>         | 115    | Mariquita     | 5.259417  | -74.89433 | exposed       | terrestrial | 22.80 | 18       | 25.60     | 1.38 | 1                   |
| <i>Dendrobates</i>  | <i>uakarii</i>           | 138    | Tahuayo       | -4.1894   | -73.1043  | --            | terrestrial | 26.00 | 3        | 15.03     | 0.38 | 1                   |
| <i>Dendrobates</i>  | <i>variabilis</i>        | 135    | Tarapoto      | -6.41689  | -76.29353 | --            | terrestrial | 22.00 | 5        | 18.29     | 0.77 | 1                   |
| <i>Dendrobates</i>  | <i>ventrimaculatus</i>   | 134    | Iquitos       | -3.842332 | -73.36121 | concealed     | terrestrial | 24.00 | 25       | 14.92     | 0.90 | 1                   |
| <i>Dendrobates</i>  | <i>ventrimaculatus</i>   | 139    | FG            | 4.08      | -52.68    | concealed     | terrestrial | 25.40 | 33       | 16.19     | 0.56 | 1                   |
| <i>Dendrobates</i>  | <i>virolinensis</i>      | 127    | Virolin       | 6.113306  | -73.19667 | concealed     | terrestrial | 22.00 | 3        | 16.27     | 0.97 | 4                   |
| <i>Epipedobates</i> | <i>anthonyi</i>          | 71     | Dueta         | -3.272305 | -79.52739 | exposed       | terrestrial | 22.90 | 1        | 21.66     | 0.00 | 2                   |

Table S1 (Cont.) Temporal, spectral, and scaling variables from calls of poison frogs including phylogeny identifier (Phy ID), locality, call behavior, habit, temperature, size, number of recordings, multinote call features, units of repetition (UR), initial pulse-note, and middle pulse-note parameters.

| Genus             | Species                       | Phy ID | Locality ID   | Latitude  | Longitude | Call Behavior | Habit       | Temp  | SVL (mm) |           |      | Analyzed recordings |
|-------------------|-------------------------------|--------|---------------|-----------|-----------|---------------|-------------|-------|----------|-----------|------|---------------------|
|                   |                               |        |               |           |           |               |             | °C    | N        | $\bar{X}$ | SD   | N of ♂              |
| <i>Epidobates</i> | <i>anthonyi</i>               | 70     | El Progreso   | -3.250003 | -79.70005 | exposed       | terrestrial | 24.50 | 6        | 18.21     | 1.67 | 3                   |
| <i>Epidobates</i> | <i>boulengeri</i>             | 67     | San Francisco | 1.09438   | -78.7075  | exposed       | terrestrial | 25.20 | 1        | 17.07     | 0.00 | 1                   |
| <i>Epidobates</i> | <i>espinosai</i>              | 69     | Palenque      | -0.59134  | -79.36161 | exposed       | terrestrial | 26.00 | 7        | 16.05     | 0.28 | 3                   |
| <i>Epidobates</i> | <i>machalilla</i>             | 73     | Ayampe        | -1.666667 | -80.78333 | exposed       | terrestrial | 25.70 | 13       | 15.22     | 0.78 | 2                   |
| <i>Epidobates</i> | <i>machalilla</i>             | 72     | Caluma        | -1.62     | -79.27    | exposed       | terrestrial | 28.40 | 1        | 15.65     | 0.00 | 1                   |
| <i>Epidobates</i> | <i>sp. F (darwinwallacei)</i> | 68     | Mindo         | -0.0333   | -78.8     | exposed       | terrestrial | 20.00 | 10       | 17.95     | 0.60 | 6                   |
| <i>Epidobates</i> | <i>tricolor</i>               | 74     | Morasungo     | -1.158611 | -79.15472 | exposed       | terrestrial | 22.00 | 1        | 22.40     | 0.00 | 1                   |
| <i>Hyloxalus</i>  | <i>sp. Agua Azul</i>          | 142    | Agua Azul     | 5.19      | -72.58031 | concealed     | riparian    | 24.70 | 1        | 14.50     | 0.00 | 2                   |
| <i>Hyloxalus</i>  | <i>awa</i>                    | 171    | Intag         | -0.316    | -78.95    | concealed     | riparian    | 24.00 | 11       | 19.99     | 0.82 | 2                   |
| <i>Hyloxalus</i>  | <i>azureiventris</i>          | 165    | Tarapoto      | -6.45043  | -76.31758 | --            | terrestrial | 24.00 | 1        | 24.65     | 0.00 | 2                   |
| <i>Hyloxalus</i>  | <i>bocagei</i>                | 151    | La Virgen     | -0.07     | -77.586   | concealed     | riparian    | 17.30 | 1        | 23.65     | 0.00 | 1                   |
| <i>Hyloxalus</i>  | <i>bocagei</i>                | 150    | San Rafael    | -0.104    | -77.58712 | concealed     | riparian    | 22.00 | 23       | 22.80     | 1.30 | 3                   |
| <i>Hyloxalus</i>  | <i>craspedocephalus</i>       | 166    | San Jose      | -6.380222 | -76.37298 | exposed       | terrestrial | 24.70 | 7        | 19.30     | 1.21 | 5                   |
| <i>Hyloxalus</i>  | <i>aff. delatorrae</i>        | 163    | Moran         | 0.77109   | -78.05596 | concealed     | terrestrial | 15.30 | 1        | 18.53     | 0.00 | 1                   |
| <i>Hyloxalus</i>  | <i>delatorrae</i>             | 162    | Moran         | 0.77109   | -78.05596 | concealed     | terrestrial | 16.10 | 1        | 18.53     | 0.00 | 1                   |
| <i>Hyloxalus</i>  | <i>elachyhistus</i>           | 169    | Corazon       | -1.1511   | -79.15121 | concealed     | riparian    | 19.50 | 1        | 21.02     | 0.00 | 1                   |
| <i>Hyloxalus</i>  | <i>elachyhistus</i>           | 168    | Faique        | -4.95     | -79.733   | concealed     | riparian    | 22.60 | 43       | 17.70     | --   | 1                   |
| <i>Hyloxalus</i>  | <i>erythromos</i>             | 140    | Palenque      | -0.5833   | -79.35    | concealed     | terrestrial | 26.00 | 1        | 21.00     | 0.00 | 2                   |
| <i>Hyloxalus</i>  | <i>infraguttatus</i>          | 170    | Jipijapa      | -1.5667   | -80.8167  | concealed     | riparian    | 22.00 | 13       | 19.87     | 0.75 | 2                   |
| <i>Hyloxalus</i>  | <i>insulatus</i>              | 167    | La Peca       | -5.611112 | -78.43501 | concealed     | riparian    | 23.20 | 4        | 22.62     | 0.93 | 2                   |
| <i>Hyloxalus</i>  | <i>italoi</i>                 | 144    | Hola Vida     | -1.636    | -77.842   | concealed     | riparian    | 20.00 | 94       | 23.10     | 1.40 | 5                   |
| <i>Hyloxalus</i>  | <i>jacobuspetersi</i>         | 152    | Aloag         | -0.42279  | -78.40466 | concealed     | riparian    | 11.00 | 3        | 23.72     | 0.58 | 2                   |
| <i>Hyloxalus</i>  | <i>maculosus</i>              | 149    | Shell         | -1.4667   | -78.1333  | concealed     | riparian    | 20.00 | 12       | 22.60     | 1.60 | 1                   |
| <i>Hyloxalus</i>  | <i>sp. Negro</i>              | 164    | Mendez        | -2.7454   | -78.3034  | exposed       | terrestrial | 25.00 | 1        | 16.20     | 0.00 | 2                   |
| <i>Hyloxalus</i>  | <i>nexipus</i>                | 154    | Mendez        | -2.7454   | -78.3034  | concealed     | riparian    | 22.30 | 4        | 21.39     | 1.70 | 3                   |
| <i>Hyloxalus</i>  | <i>aff. nexipus</i>           | 156    | Tarapoto      | -6.43066  | -76.29034 | concealed     | riparian    | 24.50 | 1        | 19.30     | 0.00 | 1                   |
| <i>Hyloxalus</i>  | <i>aff. nexipus</i>           | 155    | Shapaja       | -6.6      | -76.2833  | concealed     | riparian    | 25.40 | 4        | 21.01     | 0.63 | 3                   |
| <i>Hyloxalus</i>  | <i>pulchellus</i>             | 160    | Yanayacu      | -0.6      | -77.886   | --            | terrestrial | 16.00 | 1        | 20.40     | 0.00 | 1                   |
| <i>Hyloxalus</i>  | <i>pulchellus</i>             | 159    | Azuela        | -0.1667   | -77.65    | concealed     | terrestrial | 18.40 | 51       | 18.76     | 0.92 | 2                   |
| <i>Hyloxalus</i>  | <i>aff. pulchellus</i>        | 161    | Monte Olivo   | 0.4       | -77.8833  | concealed     | terrestrial | 24.00 | 51       | 18.76     | 0.92 | 3                   |
| <i>Hyloxalus</i>  | <i>cf. pulcherrimus</i>       | 153    | Zana          | -6.884273 | -79.06131 | --            | riparian    | 18.00 | 1        | 28.20     | 0.00 | 1                   |
| <i>Hyloxalus</i>  | <i>sauli</i>                  | 148    | Shiripuno     | -1.1045   | -76.7319  | concealed     | riparian    | 26.00 | 30       | 22.70     | 1.00 | 1                   |
| <i>Hyloxalus</i>  | <i>sorditatus</i>             | 141    | San Jose      | -6.380222 | -76.37298 | concealed     | riparian    | 24.70 | 4        | 31.20     | 0.73 | 3                   |
| <i>Hyloxalus</i>  | <i>subpunctatus</i>           | 143    | Chipaqui      | 4.423142  | -74.04532 | concealed     | terrestrial | 19.00 | 34       | 18.65     | 1.36 | 2                   |
| <i>Hyloxalus</i>  | <i>toachi</i>                 | 172    | Gloria        | -0.313529 | -78.9546  | concealed     | riparian    | 19.80 | 5        | 17.99     | 0.97 | 4                   |

Table S1 (Cont.) Temporal, spectral, and scaling variables from calls of poison frogs including phylogeny identifier (Phy ID), locality, call behavior, habit, temperature, size, number of recordings, multinote call features, units of repetition (UR), initial pulse-note, and middle pulse-note parameters.

| Genus                 | Species              | Phy ID | Locality ID    | Latitude  | Longitude | Call Behavior | Habit       | Temp  | SVL (mm) |           |      | Analyzed recordings |
|-----------------------|----------------------|--------|----------------|-----------|-----------|---------------|-------------|-------|----------|-----------|------|---------------------|
|                       |                      |        |                |           |           |               |             | °C    | N        | $\bar{X}$ | SD   | N of ♂              |
| <i>Hyloxalus</i>      | <i>vertebralis</i>   | 157    | Sigsig         | -3.092351 | -78.80381 | concealed     | terrestrial | 14.00 | 1        | 18.24     | 0.00 | 1                   |
| <i>Hyloxalus</i>      | <i>vertebralis</i>   | 158    | El Jordan      | -2.633333 | -78.6     | concealed     | terrestrial | 18.00 | 9        | 17.65     | 0.73 | 3                   |
| <i>Hyloxalus</i>      | <i>yasuni</i>        | 147    | Gugua Sumaco   | -0.7258   | -77.566   | concealed     | riparian    | 24.70 | 14       | 22.50     | 1.60 | 2                   |
| <i>Hyloxalus</i>      | <i>yasuni</i>        | 145    | Cuyabeno       | 0         | -76.2167  | concealed     | riparian    | 24.70 | 7        | 22.70     | 1.10 | 4                   |
| <i>Hyloxalus</i>      | <i>yasuni</i>        | 146    | Iro            | -0.881    | -77.5881  | concealed     | riparian    | 25.10 | 1        | 23.76     | 0.00 | 1                   |
| <i>Mannophryne</i>    | <i>urticans</i>      | 25     | Rio Frio       | 8.85935   | -71.2951  | concealed     | riparian    | 23.70 | 1        | 24.84     | 0.00 | 1                   |
| <i>Mannophryne</i>    | <i>cordilleriana</i> | 20     | Llano          | 8.87835   | -70.65482 | concealed     | riparian    | 19.20 | 3        | 25.88     | 0.36 | 2                   |
| <i>Mannophryne</i>    | <i>herminae</i>      | 19     | Rancho Grande  | 10.34958  | -67.68437 | concealed     | riparian    | 24.00 | 68       | 21.30     | 2.72 | 5                   |
| <i>Mannophryne</i>    | <i>sp. Guatopo</i>   | 15     | Guatopo        | 10.08495  | -66.48908 | exposed       | riparian    | 26.30 | 68       | 21.30     | 2.72 | 3                   |
| <i>Mannophryne</i>    | <i>leonardoi</i>     | 16     | Caripe         | 10.17088  | -63.55355 | concealed     | riparian    | 19.50 | 7        | 20.18     | 0.33 | 3                   |
| <i>Mannophryne</i>    | <i>olmonae</i>       | 12     | Charlotteville | 11.3179   | -60.5536  | --            | riparian    | 26.20 | 8        | 21.00     | 0.63 | 1                   |
| <i>Mannophryne</i>    | <i>orellana</i>      | 22     | La Trampa      | 8.032517  | -71.7277  | concealed     | riparian    | 20.60 | 7        | 26.50     | 0.70 | 2                   |
| <i>Mannophryne</i>    | <i>orellana</i>      | 21     | El Tama        | 7.578717  | -72.17898 | concealed     | riparian    | 20.30 | 7        | 26.50     | 0.70 | 2                   |
| <i>Mannophryne</i>    | <i>riveroi</i>       | 13     | Paria          | 10.68992  | -62.61023 | concealed     | riparian    | 22.30 | 5        | 36.72     | 1.54 | 2                   |
| <i>Mannophryne</i>    | <i>trinitatis</i>    | 17     | St. Benedict   | 10.6639   | -61.3991  | concealed     | riparian    | 24.90 | 15       | 21.12     | 0.74 | 4                   |
| <i>Mannophryne</i>    | <i>collaris</i>      | 23     | El Vigia       | 8.543683  | -71.58303 | concealed     | riparian    | 20.30 | 1        | 26.90     | 0.00 | 1                   |
| <i>Mannophryne</i>    | <i>collaris</i>      | 24     | Lagunillas     | 8.520867  | -71.35668 | concealed     | riparian    | 22.40 | 5        | 25.09     | 1.11 | 1                   |
| <i>Mannophryne</i>    | <i>venezuelensis</i> | 18     | Paria          | 10.68666  | -61.94656 | exposed       | terrestrial | 23.20 | 6        | 21.70     | 0.90 | 2                   |
| <i>Mannophryne</i>    | <i>vulcano</i>       | 14     | Baruta         | 10.42317  | -66.85782 | concealed     | riparian    | 21.50 | 2        | 18.80     | 0.50 | 2                   |
| <i>Mannophryne</i>    | <i>yustizi</i>       | 26     | Guarico        | 9.582283  | -69.84983 | concealed     | riparian    | 19.20 | 1        | 21.14     | 0.00 | 3                   |
| <i>Phyllobates</i>    | <i>aurotaenia</i>    | 108    | Quibdo         | 5.683944  | -76.61086 | exposed       | terrestrial | 28.00 | 1        | 27.81     | 0.00 | 1                   |
| <i>Phyllobates</i>    | <i>lugubris</i>      | 111    | OTS            | 10.43002  | -84.00552 | exposed       | terrestrial | 26.00 | 6        | 19.20     | 0.26 | 3                   |
| <i>Phyllobates</i>    | <i>lugubris</i>      | 112    | Valiente       | 9.183333  | -81.91667 | --            | terrestrial | 27.78 | 6        | 19.20     | 0.26 | 2                   |
| <i>Phyllobates</i>    | <i>terribilis</i>    | 109    | Captive risen  | 1.869548  | -77.60501 | exposed       | terrestrial | 25.20 | 150      | 41.05     | 1.36 | 1                   |
| <i>Phyllobates</i>    | <i>vittatus</i>      | 110    | Sirena         | 8.480009  | -83.58939 | exposed       | terrestrial | 25.00 | 8        | 24.40     | 1.06 | 3                   |
| <i>Rheobates</i>      | <i>palmatus</i>      | 28     | Brisas         | 4.433     | -73.918   | concealed     | riparian    | 18.00 | 5        | 27.47     | 1.30 | 4                   |
| <i>Rheobates</i>      | <i>palmatus</i>      | 27     | La Galia       | 4.951     | -74.283   | concealed     | riparian    | 19.10 | 13       | 31.70     | 0.28 | 1                   |
| <i>Silverstoneia</i>  | <i>flotator</i>      | 62     | El Gaital      | 8.62873   | -80.11603 | concealed     | terrestrial | 21.20 | 2        | 14.29     | 0.59 | 2                   |
| <i>Silverstoneia</i>  | <i>flotator</i>      | 63     | Gamboa         | 9.14778   | -79.72997 | concealed     | terrestrial | 25.70 | 35       | 15.60     | 0.50 | 6                   |
| <i>Silverstoneia</i>  | <i>nubicola</i>      | 66     | El Gaital      | 8.62873   | -80.11603 | concealed     | terrestrial | 22.60 | 24       | 17.50     | 0.70 | 5                   |
| <i>Silverstoneia</i>  | <i>nubicola</i>      | 65     | La Garcia      | 8.064444  | -78.36306 | --            | terrestrial | 23.00 | 24       | 17.50     | 0.70 | 1                   |
| <i>Silverstoneia</i>  | <i>nubicola</i>      | 64     | Quibdo         | 5.728     | -76.591   | concealed     | terrestrial | 28.00 | 2        | 15.04     | 0.34 | 4                   |
| <i>Anomaloglossus</i> | <i>stepheni</i>      | NA     | Balbina        | -1.907835 | -59.48135 | exposed       | terrestrial | 26.00 | 53       | 16.60     | 0.70 | 1                   |
| <i>Allobates</i>      | <i>goianus</i>       | NA     | Silvania       | -16.643   | -48.6041  | concealed     | terrestrial | NA    | NA       | NA        | NA   | 1                   |
| <i>Hyloxalus</i>      | <i>anthracinus</i>   | NA     | Mazan          | -2.865263 | -79.11168 | concealed     | terrestrial | NA    | 19       | 16.21     | 1.42 | 1                   |

Table S1 (Cont.) Temporal, spectral, and scaling variables from calls of poison frogs including phylogeny identifier (Phy ID), locality, call behavior, habit, temperature, size, number of recordings, multinote call features, units of repetition (UR), initial pulse-note, and middle pulse-note parameters.

| Genus            | Species                        | Phy ID | Bout Type  | Multinote Call Duration (s) |            |            | Interval between Multinote Calls (s) |            |            | Multinote Call Rise Time (s) |            |           |
|------------------|--------------------------------|--------|------------|-----------------------------|------------|------------|--------------------------------------|------------|------------|------------------------------|------------|-----------|
|                  |                                |        |            | N                           | $\bar{X}$  | SD         | N                                    | $\bar{X}$  | SD         | N                            | $\bar{X}$  | SD        |
| <i>Allobates</i> | <i>algorei</i>                 | 60     | continuous | --                          | --         | --         | --                                   | --         | --         | --                           | --         | --        |
| <i>Allobates</i> | <i>brunneus</i>                | 37     | continuous | --                          | --         | --         | --                                   | --         | --         | --                           | --         | --        |
| <i>Allobates</i> | <i>caeruleodactylus</i>        | 48     | continuous | --                          | --         | --         | --                                   | --         | --         | --                           | --         | --        |
| <i>Allobates</i> | <i>crombiei</i>                | 52     | discrete   | 12                          | 11.7103333 | 2.7358697  | 10                                   | 15.6518000 | 3.2807240  | 10                           | 0.0387641  | 0.0044621 |
| <i>Allobates</i> | <i>femorialis</i>              | 43     | discrete   | 10                          | 22.5442000 | 3.5474325  | 2                                    | 77.3745000 | 8.6938779  | 10                           | 8.6756000  | 2.2179457 |
| <i>Allobates</i> | <i>femorialis</i>              | 46     | discrete   | 24                          | 0.3882917  | 0.0080460  | 22                                   | 0.7530455  | 0.0212972  | 24                           | 0.0505417  | 0.0094316 |
| <i>Allobates</i> | <i>femorialis</i>              | 44     | discrete   | 15                          | 0.5146667  | 0.0080593  | 12                                   | 1.1808333  | 0.0925270  | 15                           | 0.0498000  | 0.0030284 |
| <i>Allobates</i> | <i>femorialis</i>              | 40     | discrete   | 42                          | 0.3638333  | 0.0047827  | 39                                   | 0.8822051  | 0.1396764  | 42                           | 0.0352143  | 0.0014405 |
| <i>Allobates</i> | <i>femorialis</i>              | 41     | discrete   | 249                         | 0.1783775  | 0.0187813  | 243                                  | 0.5500864  | 0.0709239  | 249                          | 0.0613414  | 0.0134982 |
| <i>Allobates</i> | <i>femorialis</i>              | 45     | discrete   | 38                          | 0.5156842  | 0.0119189  | 36                                   | 0.9795000  | 0.0540336  | 38                           | 0.0540000  | 0.0098447 |
| <i>Allobates</i> | <i>granti</i>                  | 49     | discrete   | 68                          | 0.0842206  | 0.0040624  | 63                                   | 0.2668730  | 0.0403834  | 69                           | 0.0325507  | 0.0037043 |
| <i>Allobates</i> | <i>humilis</i>                 | 59     | continuous | --                          | --         | --         | --                                   | --         | --         | --                           | --         | --        |
| <i>Allobates</i> | <i>insperatus</i>              | 54     | discrete   | 15                          | 3.0039333  | 0.3747097  | 4                                    | 14.5585000 | 4.4048447  | 15                           | 0.2754667  | 0.0647356 |
| <i>Allobates</i> | <i>aff. insperatus</i>         | 55     | discrete   | 1                           | 3.9680000  | 0.0000000  | --                                   | --         | --         | 1                            | 0.5980000  | 0.0000000 |
| <i>Allobates</i> | <i>juanii</i>                  | 47     | discrete   | 138                         | 0.5196739  | 0.2512094  | 119                                  | 1.6903277  | 0.3188039  | 211                          | 0.0398341  | 0.0083190 |
| <i>Allobates</i> | <i>kingsburyi</i>              | 39     | discrete   | 19                          | 24.1816316 | 6.4893567  | 6                                    | 23.2303333 | 7.2655575  | 11                           | 5.6612727  | 1.6572675 |
| <i>Allobates</i> | <i>marchesianus</i>            | 50     | continuous | --                          | --         | --         | --                                   | --         | --         | --                           | --         | --        |
| <i>Allobates</i> | <i>masniger</i>                | 58     | discrete   | 5                           | 38.6236000 | 22.7434329 | 3                                    | 58.8816667 | 8.7167440  | 5                            | 8.7998000  | 2.6266904 |
| <i>Allobates</i> | <i>nidicola</i>                | 36     | continuous | --                          | --         | --         | --                                   | --         | --         | --                           | --         | --        |
| <i>Allobates</i> | <i>olfersioides</i>            | 1      | continuous | --                          | --         | --         | --                                   | --         | --         | --                           | --         | --        |
| <i>Allobates</i> | <i>ornatus</i>                 | 51     | continuous | --                          | --         | --         | --                                   | --         | --         | --                           | --         | --        |
| <i>Allobates</i> | <i>sp. Ducke</i>               | 61     | continuous | --                          | --         | --         | --                                   | --         | --         | --                           | --         | --        |
| <i>Allobates</i> | <i>sp. Neblina</i>             | 29     | continuous | --                          | --         | --         | --                                   | --         | --         | --                           | --         | --        |
| <i>Allobates</i> | <i>sp. Negro</i>               | 38     | discrete   | 3                           | 28.2260000 | 9.9275582  | 2                                    | 58.2255000 | 15.1115790 | 3                            | 11.0493333 | 6.1792683 |
| <i>Allobates</i> | <i>sp. Shushufindi</i>         | 53     | discrete   | 3                           | 4.7920000  | 1.2615756  | 1                                    | 10.6270000 | 0.0000000  | 4                            | 1.0125000  | 0.6731669 |
| <i>Allobates</i> | <i>sp. Treviso (sp. small)</i> | 57     | continuous | --                          | --         | --         | --                                   | --         | --         | --                           | --         | --        |
| <i>Allobates</i> | <i>talamancae</i>              | 34     | discrete   | 5                           | 3.1238000  | 0.6983192  | 1                                    | 23.7920000 | 0.0000000  | 5                            | 0.5920000  | 0.1947421 |
| <i>Allobates</i> | <i>talamancae</i>              | 32     | discrete   | 5                           | 4.4394000  | 0.9324539  | 4                                    | 7.7310000  | 1.8338671  | 2                            | 0.2280000  | 0.0452548 |
| <i>Allobates</i> | <i>talamancae</i>              | 35     | discrete   | 12                          | 2.5335000  | 0.4241487  | 8                                    | 46.9521250 | 12.9046551 | 10                           | 0.5786000  | 0.0967094 |
| <i>Allobates</i> | <i>talamancae</i>              | 31     | discrete   | 5                           | 11.7526000 | 2.7547093  | 2                                    | 13.9555000 | 6.4325504  | 6                            | 0.5830000  | 0.3893297 |
| <i>Allobates</i> | <i>talamancae</i>              | 33     | discrete   | 4                           | 2.3550000  | 0.2342008  | 3                                    | 25.7563333 | 11.7571020 | 5                            | 0.3998000  | 0.0855026 |
| <i>Allobates</i> | <i>talamancae</i>              | 30     | discrete   | 1                           | 5.0960000  | 0.0000000  | 1                                    | 12.5930000 | 0.0000000  | 1                            | 0.9770000  | 0.0000000 |
| <i>Allobates</i> | <i>trilineatus</i>             | 56     | discrete   | 13                          | 3.1050000  | 0.8893163  | 10                                   | 8.8517000  | 2.3503394  | 153                          | 0.0686471  | 0.0054573 |
| <i>Allobates</i> | <i>zaparo</i>                  | 42     | discrete   | 65                          | 1.5243692  | 0.5947750  | 41                                   | 2.9646341  | 1.2880681  | 39                           | 0.5404615  | 0.1362409 |
| <i>Ameerega</i>  | <i>altamazonica</i>            | 103    | continuous | --                          | --         | --         | --                                   | --         | --         | --                           | --         | --        |

Table S1 (Cont.) Temporal, spectral, and scaling variables from calls of poison frogs including phylogeny identifier (Phy ID), locality, call behavior, habit, temperature, size, number of recordings, multinote call features, units of repetition (UR), initial pulse-note, and middle pulse-note parameters.

| Genus                      | Species                  | Phy ID | Bout Type   | Multinote Call Duration (s) |            |           | Interval between Multinote Calls (s) |            |           | Multinote Call Rise Time (s) |           |           |
|----------------------------|--------------------------|--------|-------------|-----------------------------|------------|-----------|--------------------------------------|------------|-----------|------------------------------|-----------|-----------|
|                            |                          |        |             | N                           | $\bar{X}$  | SD        | N                                    | $\bar{X}$  | SD        | N                            | $\bar{X}$ | SD        |
| <i>Ameerega</i>            | <i>bassleri</i>          | 89     | discrete    | 5                           | 11.9410000 | 3.5473988 | 3                                    | 12.9473333 | 3.8261633 | 9                            | 1.3704444 | 0.2572077 |
| <i>Ameerega</i>            | <i>bilinguis</i>         | 87     | discrete    | 17                          | 28.6585294 | 6.8966730 | 2                                    | 39.5920000 | 5.8675721 | 15                           | 4.4510000 | 1.3322620 |
| <i>Ameerega</i>            | <i>braccata</i>          | 94     | continuous  | --                          | --         | --        | --                                   | --         | --        | --                           | --        | --        |
| <i>Ameerega</i>            | <i>cainarachi</i>        | 102    | discrete    | 33                          | 1.0022727  | 1.3464426 | 32                                   | 1.2835938  | 1.3646077 | 30                           | 0.0281333 | 0.0094859 |
| <i>Ameerega</i>            | <i>flavopicta</i>        | 95     | discrete    | 60                          | 0.1753333  | 0.0058763 | 59                                   | 0.6004746  | 0.0184581 | 60                           | 0.0336833 | 0.0007009 |
| <i>Ameerega</i>            | <i>hahneli</i>           | 96     | continuous  | --                          | --         | --        | --                                   | --         | --        | --                           | --        | --        |
| <i>Ameerega</i>            | <i>hahneli</i>           | 97     | continuous  | --                          | --         | --        | --                                   | --         | --        | --                           | --        | --        |
| <i>Ameerega</i>            | <i>hahneli</i>           | 98     | continuous  | --                          | --         | --        | --                                   | --         | --        | --                           | --        | --        |
| <i>Ameerega</i>            | <i>hahneli</i>           | 99     | continuous  | --                          | --         | --        | --                                   | --         | --        | --                           | --        | --        |
| <i>Ameerega</i>            | <i>ignipedis</i>         | 90     | continuous? | --                          | --         | --        | --                                   | --         | --        | --                           | --        | --        |
| <i>Ameerega</i>            | <i>parvula</i>           | 86     | discrete    | 4                           | 6.6950000  | 0.9184019 | 2                                    | 14.4520000 | 3.3714851 | 5                            | 0.6698000 | 0.0955861 |
| <i>Ameerega</i>            | <i>petersi</i>           | 101    | discrete    | 23                          | 1.1146087  | 0.5833749 | 21                                   | 1.8900952  | 0.6433859 | 24                           | 0.0375417 | 0.0085056 |
| <i>Ameerega</i>            | <i>picta</i>             | 91     | continuous  | --                          | --         | --        | --                                   | --         | --        | --                           | --        | --        |
| <i>Ameerega</i>            | <i>picta</i>             | 92     | continuous  | --                          | --         | --        | --                                   | --         | --        | --                           | --        | --        |
| <i>Ameerega</i>            | <i>picta</i>             | 93     | continuous  | --                          | --         | --        | --                                   | --         | --        | --                           | --        | --        |
| <i>Ameerega</i>            | <i>pongoensis</i>        | 88     | continuous? | --                          | --         | --        | --                                   | --         | --        | --                           | --        | --        |
| <i>Ameerega</i>            | <i>silverstonei</i>      | 85     | discrete    | 2                           | 29.1215000 | 1.3569379 | 1                                    | 1.5000000  | 0.0000000 | 2                            | 3.8320000 | 0.5996266 |
| <i>Ameerega</i>            | <i>smaragdina</i>        | 100    | discrete    | 47                          | 0.1840638  | 0.0065488 | 46                                   | 0.3991304  | 0.0178520 | 47                           | 0.0540213 | 0.0064488 |
| <i>Ameerega</i>            | <i>trivittata</i>        | 105    | discrete    | 2                           | 10.2980000 | 5.5437172 | --                                   | --         | --        | 4                            | 0.1277500 | 0.1123221 |
| <i>Ameerega</i>            | <i>trivittata</i>        | 107    | discrete    | 2                           | 9.2915000  | 4.6053865 | 1                                    | 9.8330000  | 0.0000000 | 2                            | 0.3715000 | 0.1605132 |
| <i>Ameerega</i>            | <i>trivittata</i>        | 106    | discrete    | 27                          | 3.8370370  | 2.7008158 | 23                                   | 3.6949565  | 2.0292818 | 28                           | 0.0490357 | 0.0125889 |
| <i>Ameerega</i>            | <i>trivittata</i>        | 104    | discrete    | 1                           | 9.1910000  | 0.0000000 | 2                                    | 5.8955000  | 4.8755013 | 2                            | 0.2120000 | 0.0000000 |
| <i>Anomalogl<br/>ossus</i> | <i>baeobatrachus</i>     | 3      | discrete    | 19                          | 0.9094211  | 0.1860219 | 18                                   | 2.6618889  | 0.5195031 | 19                           | 0.0279474 | 0.0039648 |
| <i>Anomalogl<br/>ossus</i> | <i>degranvillei</i>      | 4      | continuous  | --                          | --         | --        | --                                   | --         | --        | --                           | --        | --        |
| <i>Anomalogl<br/>ossus</i> | <i>rufulus</i>           | 5      | discrete    | 1                           | 2.9100000  | 0.0000000 | 1                                    | 5.6900000  | 0.0000000 | 2                            | 0.1580000 | 0.0381838 |
| <i>Anomalogl<br/>ossus</i> | <i>verbeeksnyderorum</i> | 2      | discrete    | 10                          | 17.8454000 | 8.4575504 | 8                                    | 16.2691250 | 8.6921621 | 15                           | 0.6310667 | 0.1438489 |
| <i>Aromobates</i>          | <i>meridensis</i>        | 7      | discrete    | 1                           | 2.4130000  | 0.0000000 | --                                   | --         | --        | 1                            | 0.2670000 | 0.0000000 |
| <i>Aromobates</i>          | <i>saltuensis</i>        | 11     | discrete    | 273                         | 0.1388425  | 0.0049372 | 270                                  | 0.7315148  | 0.0928819 | 273                          | 0.0369231 | 0.0028267 |
| <i>Aromobates</i>          | <i>cannatellai</i>       | 9      | continuous  | --                          | --         | --        | --                                   | --         | --        | --                           | --        | --        |
| <i>Aromobates</i>          | aff. <i>saltuensis</i>   | 10     | continuous  | --                          | --         | --        | --                                   | --         | --        | --                           | --        | --        |
| <i>Aromobates</i>          | <i>ericksonae</i>        | 8      | discrete    | 185                         | 0.1269514  | 0.0133410 | 171                                  | 1.8741579  | 0.4369225 | 185                          | 0.0452541 | 0.0114591 |
| <i>Aromobates</i>          | <i>ornatissimus</i>      | 6      | continuous  | --                          | --         | --        | --                                   | --         | --        | --                           | --        | --        |
| <i>Colostethus</i>         | <i>argyrogastrer</i>     | 83     | continuous  | --                          | --         | --        | --                                   | --         | --        | --                           | --        | --        |
| <i>Colostethus</i>         | <i>fraterdanieli</i>     | 81     | continuous  | --                          | --         | --        | --                                   | --         | --        | --                           | --        | --        |
| <i>Colostethus</i>         | <i>fraterdanieli</i>     | 82     | continuous  | --                          | --         | --        | --                                   | --         | --        | --                           | --        | --        |

Table S1 (Cont.) Temporal, spectral, and scaling variables from calls of poison frogs including phylogeny identifier (Phy ID), locality, call behavior, habit, temperature, size, number of recordings, multinote call features, units of repetition (UR), initial pulse-note, and middle pulse-note parameters.

| Genus               | Species                  | Phy ID | Bout Type  | Multinote Call Duration (s) |            |           | Interval between Multinote Calls (s) |            |           | Multinote Call Rise Time (s) |           |           |
|---------------------|--------------------------|--------|------------|-----------------------------|------------|-----------|--------------------------------------|------------|-----------|------------------------------|-----------|-----------|
|                     |                          |        |            | N                           | $\bar{X}$  | SD        | N                                    | $\bar{X}$  | SD        | N                            | $\bar{X}$ | SD        |
| <i>Colostethus</i>  | <i>fugax</i>             | 84     | continuous | --                          | --         | --        | --                                   | --         | --        | --                           | --        | --        |
| <i>Colostethus</i>  | <i>panamansis</i>        | 76     | discrete   | 71                          | 0.2219577  | 0.0599277 | 60                                   | 1.3570500  | 0.1661618 | 71                           | 0.0602535 | 0.0028721 |
| <i>Colostethus</i>  | <i>panamansis</i>        | 75     | discrete   | 96                          | 0.1599271  | 0.0380941 | 78                                   | 0.8214103  | 0.1112288 | 97                           | 0.0459278 | 0.0035185 |
| <i>Colostethus</i>  | <i>pratti</i>            | 80     | discrete   | 76                          | 0.8582632  | 0.6750027 | 65                                   | 4.4513692  | 2.2378447 | 77                           | 0.0783896 | 0.0090396 |
| <i>Colostethus</i>  | <i>pratti</i>            | 79     | discrete   | 22                          | 2.3517727  | 0.9861664 | 17                                   | 17.6084706 | 5.6226025 | 24                           | 0.0705833 | 0.0062895 |
| <i>Colostethus</i>  | <i>pratti</i>            | 77     | discrete   | 3                           | 1.0906667  | 0.0902792 | 2                                    | 14.7910000 | 6.6623601 | 4                            | 0.0727500 | 0.0053151 |
| <i>Colostethus</i>  | aff. <i>pratti</i>       | 78     | discrete   | 37                          | 0.6258378  | 0.2947049 | 32                                   | 4.1047188  | 3.0554303 | 37                           | 0.0576216 | 0.0076498 |
| <i>Dendrobates</i>  | <i>auratus</i>           | 116    | discrete   | 6                           | 2.5558333  | 0.7967846 | 3                                    | 12.4163333 | 5.9037637 | 2                            | 0.2220000 | 0.0197990 |
| <i>Dendrobates</i>  | <i>bombetes</i>          | 126    | discrete   | 12                          | 1.3371667  | 0.1388543 | 8                                    | 16.1603750 | 3.9672180 | 10                           | 0.0287000 | 0.0043218 |
| <i>Dendrobates</i>  | <i>captivus</i>          | 125    | discrete   | 32                          | 0.2445625  | 0.0224197 | 24                                   | 2.8599583  | 0.4898592 | 28                           | 0.0469286 | 0.0126343 |
| <i>Dendrobates</i>  | <i>castaneoticus</i>     | 114    | discrete   | 2                           | 4.0635000  | 0.0007071 | 1                                    | 9.5680000  | 0.0000000 | 2                            | 0.1930000 | 0.0070711 |
| <i>Dendrobates</i>  | <i>claudiae</i>          | 130    | discrete   | 4                           | 1.1305000  | 0.0167432 | 1                                    | 7.8330000  | 0.0000000 | 4                            | 0.0470000 | 0.0121929 |
| <i>Dendrobates</i>  | <i>defleri</i>           | 133    | discrete   | 6                           | 0.4446667  | 0.0885498 | 3                                    | 2.1513333  | 0.2521911 | 6                            | 0.0365000 | 0.0048477 |
| <i>Dendrobates</i>  | <i>fantasticus</i>       | 137    | discrete   | 17                          | 0.2808824  | 0.0470716 | 15                                   | 0.5225333  | 0.0462646 | 17                           | 0.0258571 | 0.0117250 |
| <i>Dendrobates</i>  | <i>galactonotus</i>      | 113    | discrete   | 1                           | 10.3120000 | 0.0000000 | --                                   | --         | --        | 1                            | 0.5370000 | 0.0000000 |
| <i>Dendrobates</i>  | <i>granuliferus</i>      | 119    | discrete   | 42                          | 0.3910238  | 0.0214209 | 41                                   | 0.8018780  | 0.0370514 | 42                           | 0.1569762 | 0.0272500 |
| <i>Dendrobates</i>  | <i>histrionicus</i>      | 121    | discrete   | 86                          | 0.1249302  | 0.0149437 | 84                                   | 0.2489405  | 0.0260821 | 32                           | 0.0599063 | 0.0079570 |
| <i>Dendrobates</i>  | <i>imitator</i>          | 131    | discrete   | 58                          | 0.6475690  | 0.1014480 | 49                                   | 3.9236122  | 0.9734620 | 58                           | 0.0337167 | 0.0117820 |
| <i>Dendrobates</i>  | <i>lamasi (sirensis)</i> | 132    | discrete   | 4                           | 1.2343333  | 0.1678730 | 3                                    | 5.6646667  | 2.8598315 | 4                            | 0.1102500 | 0.0172699 |
| <i>Dendrobates</i>  | <i>leucomelas</i>        | 118    | discrete   | 15                          | 10.1725333 | 1.8935002 | 6                                    | 37.9243333 | 4.8647647 | 15                           | 0.4207333 | 0.0833474 |
| <i>Dendrobates</i>  | <i>minutus</i>           | 128    | discrete   | 1                           | 1.1070000  | 0.0000000 | --                                   | --         | --        | 1                            | 0.0340000 | 0.0000000 |
| <i>Dendrobates</i>  | <i>mysteriosus</i>       | 124    | discrete   | 19                          | 1.4607895  | 0.1817748 | 16                                   | 4.3336875  | 0.3896307 | 19                           | 0.0905789 | 0.0220033 |
| <i>Dendrobates</i>  | <i>pumilio</i>           | 123    | discrete   | 160                         | 0.0353813  | 0.0104472 | 152                                  | 0.1100526  | 0.0051633 | 120                          | 0.0149833 | 0.0032332 |
| <i>Dendrobates</i>  | <i>pumilio</i>           | 122    | discrete   | 30                          | 0.0778667  | 0.0024598 | 29                                   | 0.1816207  | 0.0034165 | 30                           | 0.0331111 | 0.0044318 |
| <i>Dendrobates</i>  | <i>reticulatus</i>       | 136    | discrete   | 17                          | 0.2468824  | 0.0386068 | 17                                   | 0.3786471  | 0.0482350 | 9                            | 0.0247778 | 0.0091894 |
| <i>Dendrobates</i>  | <i>sp. Quibdo</i>        | 129    | discrete   | 7                           | 1.3732857  | 0.1139703 | 1                                    | 31.4680000 | 0.0000000 | 7                            | 0.0482857 | 0.0068487 |
| <i>Dendrobates</i>  | <i>sylvaticus</i>        | 120    | discrete   | 292                         | 0.0844692  | 0.0087029 | 277                                  | 0.1853394  | 0.0061686 | 30                           | 0.0405333 | 0.0050972 |
| <i>Dendrobates</i>  | <i>tinctorius</i>        | 117    | discrete   | 4                           | 0.8680000  | 0.0184752 | 3                                    | 5.8763333  | 0.5978815 | 4                            | 0.0022500 | 0.0005000 |
| <i>Dendrobates</i>  | <i>truncatus</i>         | 115    | discrete   | 5                           | 3.0568000  | 0.1262763 | 3                                    | 30.1773333 | 7.0900435 | 5                            | 0.1022000 | 0.0231884 |
| <i>Dendrobates</i>  | <i>uakarii</i>           | 138    | discrete   | 26                          | 0.2415000  | 0.0214518 | 25                                   | 0.3587200  | 0.0246230 | 5                            | 0.0644000 | 0.0098387 |
| <i>Dendrobates</i>  | <i>variabilis</i>        | 135    | discrete   | 16                          | 0.3492500  | 0.0658893 | 14                                   | 1.2503571  | 0.2706097 | 16                           | 0.0314286 | 0.0043803 |
| <i>Dendrobates</i>  | <i>ventrimaculatus</i>   | 134    | discrete   | 22                          | 0.3942727  | 0.0615678 | 18                                   | 1.4671111  | 0.2732542 | 22                           | 0.0335000 | 0.0100167 |
| <i>Dendrobates</i>  | <i>ventrimaculatus</i>   | 139    | discrete   | 12                          | 0.4470769  | 0.1009228 | 11                                   | 1.7741818  | 0.3503703 | 12                           | 0.0172308 | 0.0072589 |
| <i>Dendrobates</i>  | <i>virolinensis</i>      | 127    | discrete   | 12                          | 1.8338333  | 0.1950113 | 6                                    | 15.4806667 | 4.7888724 | 10                           | 0.0488000 | 0.0074655 |
| <i>Epipedobates</i> | <i>anthonyi</i>          | 71     | discrete   | 8                           | 3.6827500  | 0.3317395 | 5                                    | 40.4280000 | 5.6463965 | 8                            | 0.3287500 | 0.0536517 |



Table S1 (Cont.) Temporal, spectral, and scaling variables from calls of poison frogs including phylogeny identifier (Phy ID), locality, call behavior, habit, temperature, size, number of recordings, multinote call features, units of repetition (UR), initial pulse-note, and middle pulse-note parameters.

| Genus               | Species                     | Phy ID | Bout Type  | Multinote Call Duration (s) |            |           | Interval between Multinote Calls (s) |            |            | Multinote Call Rise Time (s) |           |           |
|---------------------|-----------------------------|--------|------------|-----------------------------|------------|-----------|--------------------------------------|------------|------------|------------------------------|-----------|-----------|
|                     |                             |        |            | N                           | $\bar{X}$  | SD        | N                                    | $\bar{X}$  | SD         | N                            | $\bar{X}$ | SD        |
| <i>Epipedobates</i> | <i>anthonyi</i>             | 70     | discrete   | 22                          | 2.9562273  | 0.5961909 | 16                                   | 17.7603125 | 6.9172265  | 22                           | 0.3106000 | 0.0973904 |
| <i>Epipedobates</i> | <i>boulengeri</i>           | 67     | discrete   | 41                          | 0.1673171  | 0.0382200 | 33                                   | 0.5520606  | 0.2275005  | 41                           | 0.0104634 | 0.0024403 |
| <i>Epipedobates</i> | <i>espinosai</i>            | 69     | discrete   | 15                          | 1.1154667  | 0.6657010 | 3                                    | 27.2220000 | 13.7717638 | 15                           | 0.0996923 | 0.0396409 |
| <i>Epipedobates</i> | <i>machalilla</i>           | 73     | discrete   | 10                          | 6.7558000  | 0.5137139 | 6                                    | 30.3623333 | 4.1320271  | 10                           | 0.1797778 | 0.0614589 |
| <i>Epipedobates</i> | <i>machalilla</i>           | 72     | discrete   | 31                          | 4.1762258  | 0.3300084 | 30                                   | 17.6758000 | 2.6642026  | 31                           | 0.1410000 | 0.0280713 |
| <i>Epipedobates</i> | <i>sp. F darwinwallacei</i> | 68     | discrete   | 21                          | 1.8972857  | 0.2667295 | 11                                   | 18.0425455 | 6.6344713  | 21                           | 0.0464762 | 0.0149420 |
| <i>Epipedobates</i> | <i>tricolor</i>             | 74     | discrete   | 14                          | 2.0288571  | 0.2323584 | 4                                    | 71.4817500 | 20.5280594 | 14                           | 0.0097857 | 0.0019682 |
| <i>Hyloxalus</i>    | <i>sp. Agua Azul</i>        | 142    | discrete   | 2                           | 10.0450000 | 0.3860803 | 1                                    | 52.3620000 | 0.0000000  | 2                            | 0.7655000 | 0.2227386 |
| <i>Hyloxalus</i>    | <i>awa</i>                  | 171    | discrete   | 24                          | 3.1219167  | 1.0246179 | 18                                   | 13.4133889 | 6.7807012  | 23                           | 0.2530435 | 0.0277054 |
| <i>Hyloxalus</i>    | <i>azureiventris</i>        | 165    | discrete   | 3                           | 14.8910000 | 4.4930810 | 2                                    | 22.7595000 | 2.3497158  | 3                            | 0.4882500 | 0.1447627 |
| <i>Hyloxalus</i>    | <i>bocagei</i>              | 151    | discrete   | 3                           | 48.9756667 | 2.2757927 | 3                                    | 50.4450000 | 1.4195848  | 5                            | 1.4058000 | 0.3022196 |
| <i>Hyloxalus</i>    | <i>bocagei</i>              | 150    | discrete   | 3                           | 44.6180000 | 3.2563579 | 2                                    | 50.3475000 | 1.6708933  | 6                            | 1.3583333 | 0.7918820 |
| <i>Hyloxalus</i>    | <i>craspedoiceps</i>        | 166    | discrete   | 165                         | 0.2017758  | 0.0122426 | 155                                  | 1.1691548  | 0.1503383  | 165                          | 0.0817962 | 0.0262434 |
| <i>Hyloxalus</i>    | <i>aff. delatorreae</i>     | 163    | discrete   | 16                          | 0.0690625  | 0.0028395 | 12                                   | 0.4527500  | 0.0726963  | 16                           | 0.0094375 | 0.0030977 |
| <i>Hyloxalus</i>    | <i>delatorreae</i>          | 162    | discrete   | 43                          | 0.0666977  | 0.0038081 | 33                                   | 0.4356970  | 0.0374454  | 43                           | 0.0109535 | 0.0039638 |
| <i>Hyloxalus</i>    | <i>elachyhistus</i>         | 169    | continuous | --                          | --         | --        | --                                   | --         | --         | --                           | --        | --        |
| <i>Hyloxalus</i>    | <i>elachyhistus</i>         | 168    | continuous | --                          | --         | --        | --                                   | --         | --         | --                           | --        | --        |
| <i>Hyloxalus</i>    | <i>erythromos</i>           | 140    | discrete   | 46                          | 0.1163043  | 0.0139378 | 36                                   | 1.8160833  | 0.3126289  | 46                           | 0.0404348 | 0.0092416 |
| <i>Hyloxalus</i>    | <i>infraguttatus</i>        | 170    | discrete   | 22                          | 27.3238182 | 9.7928621 | 19                                   | 35.8256842 | 11.6378083 | 30                           | 0.0452333 | 0.0077490 |
| <i>Hyloxalus</i>    | <i>insulatus</i>            | 167    | continuous | --                          | --         | --        | --                                   | --         | --         | --                           | --        | --        |
| <i>Hyloxalus</i>    | <i>italoi</i>               | 144    | discrete   | 64                          | 3.0380313  | 0.7180940 | 57                                   | 3.9411228  | 0.5651890  | 65                           | 0.0348769 | 0.0074760 |
| <i>Hyloxalus</i>    | <i>jacobuspetersi</i>       | 152    | continuous | --                          | --         | --        | --                                   | --         | --         | --                           | --        | --        |
| <i>Hyloxalus</i>    | <i>maculosus</i>            | 149    | discrete   | 6                           | 31.2066000 | 7.7313448 | 6                                    | 31.0345000 | 7.5756757  | 5                            | 1.6056000 | 0.3168632 |
| <i>Hyloxalus</i>    | <i>sp. Negro</i>            | 164    | discrete   | 7                           | 7.0862857  | 1.2051717 | 3                                    | 79.2203333 | 11.2032754 | 7                            | 0.7128333 | 0.2539688 |
| <i>Hyloxalus</i>    | <i>nexipus</i>              | 154    | discrete   | 36                          | 1.8346111  | 0.1998630 | 25                                   | 9.4824400  | 1.3883303  | 36                           | 0.0875556 | 0.0176869 |
| <i>Hyloxalus</i>    | <i>aff. nexipus</i>         | 156    | discrete   | 7                           | 1.5537143  | 0.2741646 | 3                                    | 8.5906667  | 2.2348746  | 8                            | 0.1185000 | 0.0075593 |
| <i>Hyloxalus</i>    | <i>aff. nexipus</i>         | 155    | discrete   | 23                          | 1.5677826  | 0.1508395 | 19                                   | 4.6158947  | 0.2082282  | 24                           | 0.0607500 | 0.0039918 |
| <i>Hyloxalus</i>    | <i>pulchellus</i>           | 160    | discrete   | 22                          | 0.7743182  | 0.3182659 | 21                                   | 1.8568095  | 0.3568896  | 23                           | 0.0688261 | 0.0047544 |
| <i>Hyloxalus</i>    | <i>pulchellus</i>           | 159    | discrete   | 177                         | 0.4740113  | 0.2474264 | 173                                  | 1.6578324  | 0.5531543  | 182                          | 0.0750495 | 0.0220282 |
| <i>Hyloxalus</i>    | <i>aff. pulchellus</i>      | 161    | discrete   | 38                          | 0.4803684  | 0.1085809 | 32                                   | 2.9524688  | 0.6478068  | 41                           | 0.0390000 | 0.0047958 |
| <i>Hyloxalus</i>    | <i>cf. pulcherrimus</i>     | 153    | continuous | --                          | --         | --        | --                                   | --         | --         | --                           | --        | --        |
| <i>Hyloxalus</i>    | <i>sauli</i>                | 148    | discrete   | 16                          | 7.0157500  | 5.9926140 | 16                                   | 3.4898125  | 3.2916072  | 24                           | 0.0169167 | 0.0022634 |
| <i>Hyloxalus</i>    | <i>sorditatus</i>           | 141    | discrete   | 9                           | 2.9732222  | 0.4488206 | 7                                    | 5.4274286  | 0.6802815  | 9                            | 0.0979167 | 0.0065291 |
| <i>Hyloxalus</i>    | <i>subpunctatus</i>         | 143    | continuous | --                          | --         | --        | --                                   | --         | --         | --                           | --        | --        |
| <i>Hyloxalus</i>    | <i>toachi</i>               | 172    | discrete   | 27                          | 17.4919259 | 5.0806983 | 23                                   | 25.4472174 | 8.3552037  | 27                           | 1.3828889 | 0.5639763 |

Table S1 (Cont.) Temporal, spectral, and scaling variables from calls of poison frogs including phylogeny identifier (Phy ID), locality, call behavior, habit, temperature, size, number of recordings, multinote call features, units of repetition (UR), initial pulse-note, and middle pulse-note parameters.

| Genus                 | Species              | Phy ID | Bout Type  | Multinote Call Duration (s) |            |            | Interval between Multinote Calls (s) |            |           | Multinote Call Rise Time (s) |           |           |
|-----------------------|----------------------|--------|------------|-----------------------------|------------|------------|--------------------------------------|------------|-----------|------------------------------|-----------|-----------|
|                       |                      |        |            | N                           | $\bar{X}$  | SD         | N                                    | $\bar{X}$  | SD        | N                            | $\bar{X}$ | SD        |
| <i>Hyloxalus</i>      | <i>vertebralis</i>   | 157    | continuous | --                          | --         | --         | --                                   | --         | --        | --                           | --        | --        |
| <i>Hyloxalus</i>      | <i>vertebralis</i>   | 158    | continuous | --                          | --         | --         | --                                   | --         | --        | --                           | --        | --        |
| <i>Hyloxalus</i>      | <i>yasuni</i>        | 147    | discrete   | 78                          | 1.3620128  | 0.1857319  | 77                                   | 2.6015714  | 0.3850910 | 78                           | 0.1301667 | 0.0050128 |
| <i>Hyloxalus</i>      | <i>yasuni</i>        | 145    | discrete   | 49                          | 3.5503125  | 0.8500877  | 39                                   | 4.5188462  | 0.7681206 | 49                           | 0.3048600 | 0.0865460 |
| <i>Hyloxalus</i>      | <i>yasuni</i>        | 146    | discrete   | 22                          | 5.8539545  | 1.5677771  | 20                                   | 6.6163000  | 1.2993054 | 22                           | 0.3665455 | 0.0934043 |
| <i>Mannophryne</i>    | <i>urticans</i>      | 25     | discrete   | 5                           | 5.6770000  | 0.9954798  | 4                                    | 25.4547500 | 5.3401528 | 6                            | 0.5336667 | 0.1559547 |
| <i>Mannophryne</i>    | <i>cordilleriana</i> | 20     | discrete   | 3                           | 34.3950000 | 20.7976508 | 2                                    | 39.7485000 | 9.8450477 | 3                            | 1.6650000 | 0.9354010 |
| <i>Mannophryne</i>    | <i>herminae</i>      | 19     | discrete   | 427                         | 0.1003770  | 0.0069014  | 412                                  | 0.3277039  | 0.1252018 | 427                          | 0.0314169 | 0.0073055 |
| <i>Mannophryne</i>    | <i>sp. Guatopo</i>   | 15     | discrete   | 116                         | 0.1055517  | 0.0120494  | 111                                  | 0.4811171  | 0.1222267 | 116                          | 0.0382414 | 0.0080516 |
| <i>Mannophryne</i>    | <i>leonardoi</i>     | 16     | discrete   | 126                         | 0.2453492  | 0.0302500  | 125                                  | 1.4963440  | 0.1705892 | 126                          | 0.0309841 | 0.0054889 |
| <i>Mannophryne</i>    | <i>olmonae</i>       | 12     | continuous | --                          | --         | --         | --                                   | --         | --        | --                           | --        | --        |
| <i>Mannophryne</i>    | <i>orellana</i>      | 22     | discrete   | 4                           | 6.0940000  | 0.9612943  | 2                                    | 16.7965000 | 4.1669803 | 4                            | 1.6187500 | 0.2708645 |
| <i>Mannophryne</i>    | <i>orellana</i>      | 21     | discrete   | 14                          | 22.9282143 | 4.8348544  | 8                                    | 31.1325000 | 5.3978365 | 14                           | 7.7427143 | 1.9477743 |
| <i>Mannophryne</i>    | <i>riveroi</i>       | 13     | discrete   | 7                           | 22.6818571 | 2.0226319  | 4                                    | 41.3165000 | 4.7017711 | 6                            | 8.3753333 | 1.4589139 |
| <i>Mannophryne</i>    | <i>trinitatis</i>    | 17     | discrete   | 47                          | 0.1165532  | 0.0065998  | 43                                   | 0.2900465  | 0.0397570 | 47                           | 0.0446170 | 0.0035543 |
| <i>Mannophryne</i>    | <i>collaris</i>      | 23     | discrete   | 6                           | 22.3758333 | 2.7218040  | 3                                    | 29.3156667 | 0.5910003 | 6                            | 7.0796667 | 1.0954838 |
| <i>Mannophryne</i>    | <i>collaris</i>      | 24     | discrete   | 4                           | 19.1400000 | 3.9833447  | 2                                    | 27.3470000 | 0.6802367 | 4                            | 6.5160000 | 2.8521374 |
| <i>Mannophryne</i>    | <i>venezuelensis</i> | 18     | discrete   | 9                           | 3.6550000  | 0.3123452  | 8                                    | 8.5208750  | 1.4720622 | 9                            | 0.2092222 | 0.0204681 |
| <i>Mannophryne</i>    | <i>vulcano</i>       | 14     | discrete   | 47                          | 0.0839787  | 0.0030609  | 46                                   | 0.4298913  | 0.0634610 | 46                           | 0.0228696 | 0.0016681 |
| <i>Mannophryne</i>    | <i>yustizi</i>       | 26     | discrete   | 8                           | 9.0840000  | 1.2412699  | 5                                    | 19.1198000 | 2.3998303 | 8                            | 1.1086250 | 0.4537135 |
| <i>Phyllobates</i>    | <i>aurotaenia</i>    | 108    | discrete   | 10                          | 4.0538000  | 0.3210624  | 7                                    | 11.9222857 | 1.6673922 | 10                           | 0.1644000 | 0.0609430 |
| <i>Phyllobates</i>    | <i>lugubris</i>      | 111    | discrete   | 10                          | 4.4057000  | 0.3490384  | 7                                    | 11.9374286 | 1.1589650 | 10                           | 0.1238000 | 0.0339044 |
| <i>Phyllobates</i>    | <i>lugubris</i>      | 112    | discrete   | 6                           | 5.6963333  | 0.9260068  | 4                                    | 13.1992500 | 0.6538228 | 6                            | 0.1053333 | 0.0323460 |
| <i>Phyllobates</i>    | <i>terribilis</i>    | 109    | discrete   | 9                           | 3.8866667  | 0.7718779  | 3                                    | 8.2033333  | 0.6219810 | 9                            | 0.1523333 | 0.0057009 |
| <i>Phyllobates</i>    | <i>vittatus</i>      | 110    | discrete   | 51                          | 5.3111961  | 0.7398598  | 42                                   | 16.1379762 | 4.4484610 | 51                           | 0.1086364 | 0.0297861 |
| <i>Rheobates</i>      | <i>palmatus</i>      | 28     | discrete   | 12                          | 23.9890000 | 3.3432222  | 9                                    | 54.7277778 | 4.7071204 | 12                           | 7.6562500 | 2.2906497 |
| <i>Rheobates</i>      | <i>palmatus</i>      | 27     | discrete   | 7                           | 34.6585714 | 8.4319720  | 2                                    | 45.3775000 | 1.4417907 | 8                            | 7.2932500 | 1.2850501 |
| <i>Silverstoneia</i>  | <i>flotator</i>      | 62     | discrete   | 3                           | 41.7520000 | 6.8821990  | 4                                    | 15.3470000 | 2.0323413 | 2                            | 5.3450000 | 0.6632662 |
| <i>Silverstoneia</i>  | <i>flotator</i>      | 63     | discrete   | 7                           | 14.0818571 | 2.1521625  | 2                                    | 18.7570000 | 5.1774359 | 7                            | 3.3267143 | 0.8640765 |
| <i>Silverstoneia</i>  | <i>nubicola</i>      | 66     | discrete   | 42                          | 1.9550000  | 0.2139009  | 37                                   | 3.3112162  | 0.3805400 | 43                           | 0.0264651 | 0.0067342 |
| <i>Silverstoneia</i>  | <i>nubicola</i>      | 65     | discrete   | 2                           | 57.3445000 | 0.5706352  | --                                   | --         | --        | 2                            | 3.0375000 | 0.2481945 |
| <i>Silverstoneia</i>  | <i>nubicola</i>      | 64     | discrete   | 4                           | 8.4242500  | 3.7181373  | 5                                    | 10.0112000 | 5.2906370 | 5                            | 0.4622000 | 0.1647671 |
| <i>Anomaloglossus</i> | <i>stepheni</i>      | NA     | discrete   | 25                          | 0.3477200  | 0.0693827  | 22                                   | 1.2029091  | 0.4771244 | 25                           | 0.0242000 | 0.0030822 |
| <i>Allobates</i>      | <i>goianus</i>       | NA     | continuous | --                          | --         | --         | --                                   | --         | --        | --                           | --        | --        |
| <i>Hyloxalus</i>      | <i>anthracinus</i>   | NA     | continuous | --                          | --         | --         | --                                   | --         | --        | --                           | --        | --        |

Table S1 (Cont.) Temporal, spectral, and scaling variables from calls of poison frogs including phylogeny identifier (Phy ID), locality, call behavior, habit, temperature, size, number of recordings, multinote call features, units of repetition (UR), initial pulse-note, and middle pulse-note parameters.

| Genus            | Species                        | Phy ID | Pulse-Notes in Multinote Calls |                  |            | Multinote Call Rate (Calls/second) |           |           | Multinote Pulse-Note Rate (Pulses/ second) |            |           |
|------------------|--------------------------------|--------|--------------------------------|------------------|------------|------------------------------------|-----------|-----------|--------------------------------------------|------------|-----------|
|                  |                                |        | N                              | $\bar{X}$        | SD         | N                                  | $\bar{X}$ | SD        | N                                          | $\bar{X}$  | SD        |
| <i>Allobates</i> | <i>algorei</i>                 | 60     | --                             | --               | --         | --                                 | --        | --        | --                                         | --         | --        |
| <i>Allobates</i> | <i>brunneus</i>                | 37     | --                             | --               | --         | --                                 | --        | --        | --                                         | --         | --        |
| <i>Allobates</i> | <i>caeruleodactylus</i>        | 48     | --                             | --               | --         | --                                 | --        | --        | --                                         | --         | --        |
| <i>Allobates</i> | <i>crombiei</i>                | 52     | 12                             | 55.1666667       | 4.0414519  | 2                                  | 0.0648599 | 0.0053660 | 49                                         | 11.9157602 | 1.1972175 |
| <i>Allobates</i> | <i>femorialis</i>              | 43     | 10                             | 78.8000000       | 15.5334764 | 1                                  | 0.0130063 | 0.0000000 | 10                                         | 3.4824782  | 0.5372889 |
| <i>Allobates</i> | <i>femorialis</i>              | 46     | 24                             | 4.0000000        | 0.0000000  | 1                                  | 1.3290402 | 0.0000000 | 2                                          | 5.4713495  | 0.0827116 |
| <i>Allobates</i> | <i>femorialis</i>              | 44     | 15                             | 4.0000000        | 0.0000000  | 1                                  | 0.8338197 | 0.0000000 | 2                                          | 4.0334116  | 0.8055083 |
| <i>Allobates</i> | <i>femorialis</i>              | 40     | 42                             | 4.0000000        | 0.0000000  | 1                                  | 1.1473250 | 0.0000000 | 2                                          | 3.7952152  | 1.2171143 |
| <i>Allobates</i> | <i>femorialis</i>              | 41     | 249                            | 2.0000000        | 0.0000000  | 4                                  | 1.8242176 | 0.0952533 | 5                                          | 3.5826617  | 0.2568000 |
| <i>Allobates</i> | <i>femorialis</i>              | 45     | 38                             | 4.0000000        | 0.0000000  | 1                                  | 1.0174857 | 0.0000000 | 2                                          | 4.6096676  | 0.7997517 |
| <i>Allobates</i> | <i>granti</i>                  | 49     | 68                             | 2.0000000        | 0.0000000  | 5                                  | 3.7822953 | 0.2187595 | 4                                          | 7.5457397  | 0.4261070 |
| <i>Allobates</i> | <i>humilis</i>                 | 59     | --                             | --               | --         | --                                 | --        | --        | --                                         | --         | --        |
| <i>Allobates</i> | <i>insperatus</i>              | 54     | 15                             | 37.3846154       | 1.8501559  | 4                                  | 0.0666694 | 0.0154494 | 15                                         | 12.2113454 | 1.0831765 |
| <i>Allobates</i> | <i>aff. insperatus</i>         | 55     | 1                              | 52.0000000       | 0.0000000  | --                                 | --        | --        | 2                                          | 12.8643546 | 0.1314688 |
| <i>Allobates</i> | <i>juanii</i>                  | 47     | 138                            | 2.0841584        | 0.9292626  | 9                                  | 0.5786450 | 0.0567918 | 8                                          | 1.3531191  | 0.4524406 |
| <i>Allobates</i> | <i>kingsburyi</i>              | 39     | 20                             | 91.9500000       | 26.9199105 | 3                                  | 0.0437201 | 0.0126474 | 20                                         | 3.7844478  | 0.4986547 |
| <i>Allobates</i> | <i>marchesianus</i>            | 50     | --                             | --               | --         | --                                 | --        | --        | --                                         | --         | --        |
| <i>Allobates</i> | <i>masniger</i>                | 58     | 5                              | 122.2000000<br>0 | 64.0288997 | 2                                  | 0.0176511 | 0.0022900 | 5                                          | 3.2196768  | 0.2286333 |
| <i>Allobates</i> | <i>nidicola</i>                | 36     | --                             | --               | --         | --                                 | --        | --        | --                                         | --         | --        |
| <i>Allobates</i> | <i>olfersioides</i>            | 1      | --                             | --               | --         | --                                 | --        | --        | --                                         | --         | --        |
| <i>Allobates</i> | <i>ornatus</i>                 | 51     | --                             | --               | --         | --                                 | --        | --        | --                                         | --         | --        |
| <i>Allobates</i> | <i>sp. Ducke</i>               | 61     | --                             | --               | --         | --                                 | --        | --        | --                                         | --         | --        |
| <i>Allobates</i> | <i>sp. Neblina</i>             | 29     | --                             | --               | --         | --                                 | --        | --        | --                                         | --         | --        |
| <i>Allobates</i> | <i>sp. Negro</i>               | 38     | 2                              | 297.5000000      | 3.5355339  | 2                                  | 0.0177732 | 0.0046128 | 2                                          | 8.7651744  | 0.3973649 |
| <i>Allobates</i> | <i>sp. Shushufindi</i>         | 53     | 4                              | 11.7500000       | 4.5734742  | 1                                  | 0.0940999 | 0.0000000 | 4                                          | 2.7235773  | 0.3121869 |
| <i>Allobates</i> | <i>sp. Treviso (sp. small)</i> | 57     | --                             | --               | --         | --                                 | --        | --        | --                                         | --         | --        |
| <i>Allobates</i> | <i>talamancae</i>              | 34     | 5                              | 18.0000000       | 3.4641016  | 1                                  | 0.0420309 | 0.0000000 | 5                                          | 5.5491807  | 0.3391798 |
| <i>Allobates</i> | <i>talamancae</i>              | 32     | 6                              | 16.6666667       | 4.6761808  | 4                                  | 0.1347204 | 0.0303824 | 5                                          | 3.3398027  | 0.4222404 |
| <i>Allobates</i> | <i>talamancae</i>              | 35     | 10                             | 11.7000000       | 1.2516656  | 2                                  | 0.0182275 | 0.0042090 | 10                                         | 4.5712285  | 0.8461314 |
| <i>Allobates</i> | <i>talamancae</i>              | 31     | 6                              | 32.1666667       | 5.6361926  | 1                                  | 0.0716563 | 0.0000000 | 6                                          | 3.1168277  | 0.6617098 |
| <i>Allobates</i> | <i>talamancae</i>              | 33     | 5                              | 14.6000000       | 3.1304952  | 2                                  | 0.0387792 | 0.0181044 | 5                                          | 6.4065698  | 0.3892379 |
| <i>Allobates</i> | <i>talamancae</i>              | 30     | 2                              | 19.0000000       | 1.4142136  | 1                                  | 0.0794092 | 0.0000000 | 2                                          | 4.8515237  | 0.3249539 |
| <i>Allobates</i> | <i>trilineatus</i>             | 56     | 13                             | 23.5384615       | 6.5398189  | 2                                  | 0.1091804 | 0.0187788 | 13                                         | 7.4078021  | 0.6674876 |
| <i>Allobates</i> | <i>zaparo</i>                  | 42     | 64                             | 10.3750000       | 3.5433819  | 14                                 | 0.3700757 | 0.0962547 | 59                                         | 6.7090397  | 0.3980032 |
| <i>Ameerega</i>  | <i>altamazonica</i>            | 103    | --                             | --               | --         | --                                 | --        | --        | --                                         | --         | --        |

Table S1 (Cont.) Temporal, spectral, and scaling variables from calls of poison frogs including phylogeny identifier (Phy ID), locality, call behavior, habit, temperature, size, number of recordings, multinote call features, units of repetition (UR), initial pulse-note, and middle pulse-note parameters.

| Genus                  | Species                  | Phy ID | Pulse-Notes in Multinote Calls |            |            | Multinote Call Rate (Calls/second) |           |           | Multinote Pulse-Note Rate (Pulses/ second) |            |           |
|------------------------|--------------------------|--------|--------------------------------|------------|------------|------------------------------------|-----------|-----------|--------------------------------------------|------------|-----------|
|                        |                          |        | N                              | $\bar{X}$  | SD         | N                                  | $\bar{X}$ | SD        | N                                          | $\bar{X}$  | SD        |
| <i>Ameerega</i>        | <i>bassleri</i>          | 89     | 6                              | 20.8333333 | 5.9132619  | 1                                  | 0.0459728 | 0.0000000 | 10                                         | 2.0688581  | 0.1889057 |
| <i>Ameerega</i>        | <i>bilinguis</i>         | 87     | 17                             | 245.823529 | 65.4649098 | 2                                  | 0.0255381 | 0.0037848 | 17                                         | 8.4976174  | 0.6411416 |
| <i>Ameerega</i>        | <i>braccata</i>          | 94     | --                             | --         | --         | --                                 | --        | --        | --                                         | --         | --        |
| <i>Ameerega</i>        | <i>cainarachi</i>        | 102    | 33                             | 8.4230769  | 9.0296094  | 1                                  | 0.5112633 | 0.0000000 | 33                                         | 8.2255968  | 0.6122573 |
| <i>Ameerega</i>        | <i>flavopicta</i>        | 95     | 60                             | 9.0666667  | 0.2515489  | 1                                  | 1.6653494 | 0.0000000 | 60                                         | 49.0092191 | 0.6761700 |
| <i>Ameerega</i>        | <i>hahneli</i>           | 96     | --                             | --         | --         | --                                 | --        | --        | --                                         | --         | --        |
| <i>Ameerega</i>        | <i>hahneli</i>           | 97     | --                             | --         | --         | --                                 | --        | --        | --                                         | --         | --        |
| <i>Ameerega</i>        | <i>hahneli</i>           | 98     | --                             | --         | --         | --                                 | --        | --        | --                                         | --         | --        |
| <i>Ameerega</i>        | <i>hahneli</i>           | 99     | --                             | --         | --         | --                                 | --        | --        | --                                         | --         | --        |
| <i>Ameerega</i>        | <i>ignipedis</i>         | 90     | --                             | --         | --         | --                                 | --        | --        | --                                         | --         | --        |
| <i>Ameerega</i>        | <i>parvula</i>           | 86     | 4                              | 168.500000 | 23.9513396 | 2                                  | 0.0711302 | 0.0165938 | 4                                          | 24.8451822 | 0.5033856 |
| <i>Ameerega</i>        | <i>petersi</i>           | 101    | 22                             | 9.1363636  | 1.7264181  | 2                                  | 0.4796204 | 0.0320770 | 23                                         | 8.5176197  | 0.1736190 |
| <i>Ameerega</i>        | <i>picta</i>             | 91     | --                             | --         | --         | --                                 | --        | --        | --                                         | --         | --        |
| <i>Ameerega</i>        | <i>picta</i>             | 92     | --                             | --         | --         | --                                 | --        | --        | --                                         | --         | --        |
| <i>Ameerega</i>        | <i>picta</i>             | 93     | --                             | --         | --         | --                                 | --        | --        | --                                         | --         | --        |
| <i>Ameerega</i>        | <i>pongoensis</i>        | 88     | --                             | --         | --         | --                                 | --        | --        | --                                         | --         | --        |
| <i>Ameerega</i>        | <i>silverstonei</i>      | 85     | 2                              | 99.5000000 | 4.9497475  | 2                                  | 0.0321627 | 0.0014023 | 2                                          | 3.3929068  | 0.0133995 |
| <i>Ameerega</i>        | <i>smaragdina</i>        | 100    | 47                             | 2.0000000  | 0.0000000  | 1                                  | 2.5054466 | 0.0000000 | 1                                          | 5.0297458  | 0.0000000 |
| <i>Ameerega</i>        | <i>trivittata</i>        | 105    | 2                              | 47.5000000 | 23.3345238 | --                                 | --        | --        | 2                                          | 4.6059090  | 0.2110045 |
| <i>Ameerega</i>        | <i>trivittata</i>        | 107    | 3                              | 38.3333333 | 20.6478409 | 1                                  | 0.2033967 | 0.0000000 | 3                                          | 4.7875606  | 0.0974941 |
| <i>Ameerega</i>        | <i>trivittata</i>        | 106    | 28                             | 15.4642857 | 10.3726212 | 4                                  | 0.3087934 | 0.0910341 | 33                                         | 4.3562288  | 0.2462356 |
| <i>Ameerega</i>        | <i>trivittata</i>        | 104    | 2                              | 36.5000000 | 30.4055916 | 1                                  | 0.4084967 | 0.0000000 | 2                                          | 6.2172506  | 0.0163721 |
| <i>Anomalogl ossus</i> | <i>baeobatrachus</i>     | 3      | 19                             | 14.4210526 | 2.8346230  | 1                                  | 0.3756731 | 0.0000000 | 19                                         | 15.1712987 | 0.0898294 |
| <i>Anomalogl ossus</i> | <i>degranvillei</i>      | 4      | --                             | --         | --         | --                                 | --        | --        | --                                         | --         | --        |
| <i>Anomalogl ossus</i> | <i>rifulus</i>           | 5      | 1                              | 18.0000000 | 0.0000000  | 1                                  | 0.1632387 | 0.0000000 | 2                                          | 6.4207316  | 0.6505415 |
| <i>Anomalogl ossus</i> | <i>verbeeksnyderorum</i> | 2      | 10                             | 159.600000 | 74.4195315 | 2                                  | 0.0689780 | 0.0318761 | 12                                         | 8.9496862  | 0.1360160 |
| <i>Aromobates</i>      | <i>meridensis</i>        | 7      | 1                              | 20.0000000 | 0.0000000  | --                                 | --        | --        | 1                                          | 8.0782313  | 0.0000000 |
| <i>Aromobates</i>      | <i>saltuensis</i>        | 11     | 273                            | 2.0000000  | 0.0000000  | 3                                  | 1.4110161 | 0.1015698 | 3                                          | 2.8410390  | 0.2213065 |
| <i>Aromobates</i>      | <i>cannatellai</i>       | 9      | --                             | --         | --         | --                                 | --        | --        | --                                         | --         | --        |
| <i>Aromobates</i>      | aff. <i>saltuensis</i>   | 10     | --                             | --         | --         | --                                 | --        | --        | --                                         | --         | --        |
| <i>Aromobates</i>      | <i>ericksonae</i>        | 8      | 185                            | 2.0000000  | 0.0000000  | 9                                  | 0.4753256 | 0.0405122 | 5                                          | 1.2555867  | 0.2331849 |
| <i>Aromobates</i>      | <i>ornatissimus</i>      | 6      | --                             | --         | --         | --                                 | --        | --        | --                                         | --         | --        |
| <i>Colostethus</i>     | <i>argyrogastrer</i>     | 83     | --                             | --         | --         | --                                 | --        | --        | --                                         | --         | --        |
| <i>Colostethus</i>     | <i>fraterdanieli</i>     | 81     | --                             | --         | --         | --                                 | --        | --        | --                                         | --         | --        |
| <i>Colostethus</i>     | <i>fraterdanieli</i>     | 82     | --                             | --         | --         | --                                 | --        | --        | --                                         | --         | --        |

Table S1 (Cont.) Temporal, spectral, and scaling variables from calls of poison frogs including phylogeny identifier (Phy ID), locality, call behavior, habit, temperature, size, number of recordings, multinote call features, units of repetition (UR), initial pulse-note, and middle pulse-note parameters.

| Genus               | Species                  | Phy ID | Pulse-Notes in Multinote Calls |             |            | Multinote Call Rate (Calls/second) |           |           | Multinote Pulse-Note Rate (Pulses/ second) |            |            |
|---------------------|--------------------------|--------|--------------------------------|-------------|------------|------------------------------------|-----------|-----------|--------------------------------------------|------------|------------|
|                     |                          |        | N                              | $\bar{X}$   | SD         | N                                  | $\bar{X}$ | SD        | N                                          | $\bar{X}$  | SD         |
| <i>Colostethus</i>  | <i>fugax</i>             | 84     | --                             | --          | --         | --                                 | --        | --        | --                                         | --         | --         |
| <i>Colostethus</i>  | <i>panamansis</i>        | 76     | 71                             | 2.6760563   | 0.5548397  | 6                                  | 0.7113362 | 0.0690464 | 5                                          | 1.9885941  | 0.3937620  |
| <i>Colostethus</i>  | <i>panamansis</i>        | 75     | 96                             | 2.4795918   | 0.5021519  | 4                                  | 1.2211562 | 0.1030549 | 3                                          | 3.3360951  | 0.3432298  |
| <i>Colostethus</i>  | <i>pratti</i>            | 80     | 77                             | 5.0259740   | 3.4904909  | 10                                 | 0.2210912 | 0.0635905 | 74                                         | 4.9319271  | 0.2323629  |
| <i>Colostethus</i>  | <i>pratti</i>            | 79     | 22                             | 12.0454546  | 4.5615084  | 6                                  | 0.0586880 | 0.0172320 | 24                                         | 4.7115051  | 0.3774403  |
| <i>Colostethus</i>  | <i>pratti</i>            | 77     | 4                              | 5.7500000   | 1.2583057  | 2                                  | 0.0752416 | 0.0338913 | 4                                          | 5.1710273  | 0.1844375  |
| <i>Colostethus</i>  | aff. <i>pratti</i>       | 78     | 37                             | 5.8108108   | 2.7063489  | 3                                  | 0.3106197 | 0.1001362 | 35                                         | 7.9751712  | 0.6328982  |
| <i>Dendrobates</i>  | <i>auratus</i>           | 116    | 2                              | 215.5000000 | 70.0035713 | 1                                  | 0.0805391 | 0.0000000 | 2                                          | 62.1740951 | 4.4407802  |
| <i>Dendrobates</i>  | <i>bombetes</i>          | 126    | 11                             | 225.545454  | 16.6334821 | 3                                  | 0.0588885 | 0.0122031 | 12                                         | 162.575156 | 17.4081798 |
| <i>Dendrobates</i>  | <i>captivus</i>          | 125    | 32                             | 12.4375000  | 1.0757593  | 2                                  | 0.2787046 | 0.0151917 | 32                                         | 49.6663073 | 1.9461121  |
| <i>Dendrobates</i>  | <i>castaneoticus</i>     | 114    | 2                              | 345.0000000 | 0.0000000  | 1                                  | 0.1045151 | 0.0000000 | 2                                          | 84.9277983 | 0.0444782  |
| <i>Dendrobates</i>  | <i>claudiae</i>          | 130    | 4                              | 70.7500000  | 5.5000000  | 1                                  | 0.1276650 | 0.0000000 | 4                                          | 62.1336390 | 5.6203158  |
| <i>Dendrobates</i>  | <i>defleri</i>           | 133    | 6                              | 41.6666667  | 9.9331096  | 3                                  | 0.4694329 | 0.0589301 | 5                                          | 94.6992434 | 3.5610933  |
| <i>Dendrobates</i>  | <i>fantasticus</i>       | 137    | 7                              | 14.0000000  | 1.8257419  | 2                                  | 1.8862803 | 0.1799804 | 7                                          | 44.4037064 | 1.0194858  |
| <i>Dendrobates</i>  | <i>galactonotus</i>      | 113    | 1                              | 634.0000000 | 0.0000000  | --                                 | --        | --        | 1                                          | 61.4503446 | 0.0000000  |
| <i>Dendrobates</i>  | <i>granuliferus</i>      | 119    | 42                             | 57.1428571  | 4.1880866  | 1                                  | 1.2470724 | 0.0000000 | 42                                         | 145.630531 | 4.3979319  |
| <i>Dendrobates</i>  | <i>histrionicus</i>      | 121    | 32                             | 27.7500000  | 2.6760587  | 3                                  | 3.8380322 | 0.2886519 | 29                                         | 244.967721 | 8.2983524  |
| <i>Dendrobates</i>  | <i>imitator</i>          | 131    | 63                             | 22.9047619  | 4.4239607  | 3                                  | 0.1866517 | 0.0690296 | 61                                         | 34.7643041 | 1.7976659  |
| <i>Dendrobates</i>  | <i>lamasi (sirensis)</i> | 132    | 4                              | 32.0000000  | 3.5590261  | 1                                  | 0.1765329 | 0.0000000 | 4                                          | 24.5410479 | 0.4371967  |
| <i>Dendrobates</i>  | <i>leucomelas</i>        | 118    | 15                             | 163.333333  | 31.2219398 | 4                                  | 0.0462554 | 0.0210866 | 17                                         | 16.6554148 | 0.8246094  |
| <i>Dendrobates</i>  | <i>minutus</i>           | 128    | 1                              | 93.0000000  | 0.0000000  | --                                 | --        | --        | 1                                          | 83.4088849 | 0.0000000  |
| <i>Dendrobates</i>  | <i>mysteriosus</i>       | 124    | 18                             | 72.8333333  | 8.5146932  | 3                                  | 0.2295119 | 0.0113562 | 19                                         | 51.0486091 | 3.8430830  |
| <i>Dendrobates</i>  | <i>pumilio</i>           | 123    | 154                            | 13.0844156  | 3.9439725  | 2                                  | 8.6016514 | 0.5882556 | 147                                        | 353.442818 | 31.5096991 |
| <i>Dendrobates</i>  | <i>pumilio</i>           | 122    | 30                             | 16.8666667  | 0.9732042  | 1                                  | 5.5059806 | 0.0000000 | 30                                         | 213.442260 | 8.9176284  |
| <i>Dendrobates</i>  | <i>reticulatus</i>       | 136    | 8                              | 56.3750000  | 5.3702221  | 2                                  | 2.6793306 | 0.3565885 | 7                                          | 271.913296 | 10.8302223 |
| <i>Dendrobates</i>  | <i>sp. Quibdo</i>        | 129    | 7                              | 152.428571  | 12.5014285 | 1                                  | 0.0317783 | 0.0000000 | 7                                          | 110.596687 | 3.7445220  |
| <i>Dendrobates</i>  | <i>sylvaticus</i>        | 120    | 30                             | 23.4666667  | 1.6553640  | 2                                  | 5.2287954 | 0.0710275 | 26                                         | 302.962360 | 9.7313762  |
| <i>Dendrobates</i>  | <i>tinctorius</i>        | 117    | 4                              | 121.5000000 | 2.8867513  | 1                                  | 0.1701741 | 0.0000000 | 4                                          | 139.179229 | 0.4157792  |
| <i>Dendrobates</i>  | <i>truncatus</i>         | 115    | 5                              | 155.4000000 | 5.8566202  | 1                                  | 0.0331375 | 0.0000000 | 5                                          | 50.7794290 | 3.3794130  |
| <i>Dendrobates</i>  | <i>uakarii</i>           | 138    | 5                              | 13.0000000  | 0.7071068  | 1                                  | 2.7876896 | 0.0000000 | 5                                          | 56.4668852 | 2.6214740  |
| <i>Dendrobates</i>  | <i>variabilis</i>        | 135    | 14                             | 88.1428571  | 12.1709436 | 1                                  | 0.7149666 | 0.0000000 | 12                                         | 249.275604 | 16.9270958 |
| <i>Dendrobates</i>  | <i>ventrimaculatus</i>   | 134    | 22                             | 107.0000000 | 11.4309521 | 1                                  | 0.6031965 | 0.0000000 | 3                                          | 301.651573 | 27.5988263 |
| <i>Dendrobates</i>  | <i>ventrimaculatus</i>   | 139    | 12                             | 78.2307692  | 8.3681325  | 1                                  | 0.5250847 | 0.0000000 | 11                                         | 169.865463 | 21.2883870 |
| <i>Dendrobates</i>  | <i>virolinensis</i>      | 127    | 11                             | 197.0000000 | 29.7892598 | 2                                  | 0.0422793 | 0.0141707 | 12                                         | 108.153035 | 12.8018365 |
| <i>Epipedobates</i> | <i>anthonyi</i>          | 71     | 8                              | 60.7500000  | 5.1754917  | 2                                  | 0.0233059 | 0.0012450 | 8                                          | 16.3754780 | 0.4639296  |

Table S1 (Cont.) Temporal, spectral, and scaling variables from calls of poison frogs including phylogeny identifier (Phy ID), locality, call behavior, habit, temperature, size, number of recordings, multinote call features, units of repetition (UR), initial pulse-note, and middle pulse-note parameters.

| Genus               | Species                     | Phy ID | Pulse-Notes in Multinote Calls |             |            | Multinote Call Rate (Calls/second) |           |           | Multinote Pulse-Note Rate (Pulses/ second) |            |            |
|---------------------|-----------------------------|--------|--------------------------------|-------------|------------|------------------------------------|-----------|-----------|--------------------------------------------|------------|------------|
|                     |                             |        | N                              | $\bar{X}$   | SD         | N                                  | $\bar{X}$ | SD        | N                                          | $\bar{X}$  | SD         |
| <i>Epipedobates</i> | <i>anthonyi</i>             | 70     | 22                             | 56.5909091  | 10.9224936 | 3                                  | 0.0639399 | 0.0326331 | 22                                         | 19.0288307 | 0.8268543  |
| <i>Epipedobates</i> | <i>boulengeri</i>           | 67     | 41                             | 7.4390244   | 1.5976354  | 8                                  | 1.7979613 | 0.4811882 | 41                                         | 42.2707890 | 1.2752533  |
| <i>Epipedobates</i> | <i>espinosai</i>            | 69     | 15                             | 60.0833333  | 31.7503281 | 3                                  | 0.0417234 | 0.0163531 | 15                                         | 44.4095942 | 2.6341783  |
| <i>Epipedobates</i> | <i>machalilla</i>           | 73     | 10                             | 119.4000000 | 8.7330789  | 2                                  | 0.0338539 | 0.0034159 | 10                                         | 17.5832741 | 0.3664280  |
| <i>Epipedobates</i> | <i>machalilla</i>           | 72     | 31                             | 124.848484  | 9.5266771  | 3                                  | 0.0565305 | 0.0038258 | 31                                         | 29.8836117 | 0.2443073  |
| <i>Epipedobates</i> | <i>sp. F darwinwallacei</i> | 68     | 19                             | 66.6315790  | 7.3651622  | 6                                  | 0.0488690 | 0.0206981 | 21                                         | 35.1054082 | 4.0190783  |
| <i>Epipedobates</i> | <i>tricolor</i>             | 74     | 14                             | 59.0000000  | 6.5983681  | 1                                  | 0.0139896 | 0.0000000 | 14                                         | 28.8393939 | 0.4444189  |
| <i>Hyloxalus</i>    | <i>sp. Agua Azul</i>        | 142    | 2                              | 78.5000000  | 0.7071068  | 1                                  | 0.0190978 | 0.0000000 | 2                                          | 7.8891719  | 0.3006070  |
| <i>Hyloxalus</i>    | <i>awa</i>                  | 171    | 25                             | 20.1200000  | 7.1199251  | 25                                 | 6.4203545 | 0.1986079 | 25                                         | 6.4203545  | 0.1986079  |
| <i>Hyloxalus</i>    | <i>azureiventris</i>        | 165    | 3                              | 228.000000  | 68.0220553 | 2                                  | 0.0441738 | 0.0046231 | 5                                          | 15.2958541 | 0.1040519  |
| <i>Hyloxalus</i>    | <i>bocagei</i>              | 151    | 3                              | 348.000000  | 17.4355958 | 1                                  | 0.0197433 | 0.0000000 | 5                                          | 6.3087781  | 0.9678846  |
| <i>Hyloxalus</i>    | <i>bocagei</i>              | 150    | 3                              | 274.000000  | 7.2111026  | 1                                  | 0.0199295 | 0.0000000 | 6                                          | 5.8848480  | 0.5080704  |
| <i>Hyloxalus</i>    | <i>craspedoiceps</i>        | 166    | 13                             | 25.0000000  | 0.4082483  | 5                                  | 0.8667879 | 0.0239919 | 165                                        | 142.339816 | 0.8128326  |
| <i>Hyloxalus</i>    | <i>aff. delatorreae</i>     | 163    | 16                             | 7.3125000   | 0.6020797  | 4                                  | 2.2576166 | 0.2837818 | 14                                         | 103.190687 | 4.6324586  |
| <i>Hyloxalus</i>    | <i>delatorreae</i>          | 162    | 43                             | 6.7209302   | 0.7661152  | 10                                 | 2.3280185 | 0.1354180 | 42                                         | 96.9081781 | 12.5118993 |
| <i>Hyloxalus</i>    | <i>elachyhistus</i>         | 169    | --                             | --          | --         | --                                 | --        | --        | --                                         | --         | --         |
| <i>Hyloxalus</i>    | <i>elachyhistus</i>         | 168    | --                             | --          | --         | --                                 | --        | --        | --                                         | --         | --         |
| <i>Hyloxalus</i>    | <i>erythromos</i>           | 140    | 46                             | 20.8461539  | 2.3679712  | 1                                  | 0.5740195 | 0.0000000 | 46                                         | 170.602707 | 19.0604383 |
| <i>Hyloxalus</i>    | <i>infraguttatus</i>        | 170    | 22                             | 59.2727273  | 23.9963922 | 6                                  | 0.0324874 | 0.0096976 | 25                                         | 2.0920895  | 0.1927151  |
| <i>Hyloxalus</i>    | <i>insulatus</i>            | 167    | --                             | --          | --         | --                                 | --        | --        | --                                         | --         | --         |
| <i>Hyloxalus</i>    | <i>italoi</i>               | 144    | 63                             | 34.2222222  | 8.7001009  | 5                                  | 0.2419844 | 0.0355546 | 66                                         | 11.2132896 | 0.9473604  |
| <i>Hyloxalus</i>    | <i>jacobuspetersi</i>       | 152    | --                             | --          | --         | --                                 | --        | --        | --                                         | --         | --         |
| <i>Hyloxalus</i>    | <i>maculosus</i>            | 149    | 4                              | 167.250000  | 41.1126501 | 1                                  | 0.0339563 | 0.0000000 | 4                                          | 7.4128774  | 0.5586346  |
| <i>Hyloxalus</i>    | <i>sp. Negro</i>            | 164    | 7                              | 28.4285714  | 4.6496288  | 4                                  | 0.0187442 | 0.0091913 | 7                                          | 3.9263553  | 0.1680832  |
| <i>Hyloxalus</i>    | <i>nexipus</i>              | 154    | 36                             | 25.9166667  | 2.6872716  | 6                                  | 0.0989956 | 0.0169677 | 36                                         | 13.7904109 | 0.1885200  |
| <i>Hyloxalus</i>    | <i>aff. nexipus</i>         | 156    | 8                              | 17.8750000  | 4.3895167  | 3                                  | 0.1297824 | 0.0291665 | 7                                          | 11.8285189 | 0.2588150  |
| <i>Hyloxalus</i>    | <i>aff. nexipus</i>         | 155    | 22                             | 22.3181818  | 1.6729319  | 3                                  | 0.2160778 | 0.0089566 | 23                                         | 13.6014397 | 0.1794989  |
| <i>Hyloxalus</i>    | <i>pulchellus</i>           | 160    | 22                             | 2.7826087   | 0.7358682  | 1                                  | 0.5260641 | 0.0000000 | 1                                          | 1.4780405  | 0.0000000  |
| <i>Hyloxalus</i>    | <i>pulchellus</i>           | 159    | 177                            | 2.1630435   | 0.4253491  | 11                                 | 0.7437579 | 0.2332222 | 8                                          | 1.6345070  | 0.3882818  |
| <i>Hyloxalus</i>    | <i>aff. pulchellus</i>      | 161    | 38                             | 4.7297297   | 0.9617302  | 5                                  | 0.2909166 | 0.0643129 | 5                                          | 1.7269534  | 0.3325821  |
| <i>Hyloxalus</i>    | <i>cf. pulcherrimus</i>     | 153    | --                             | --          | --         | --                                 | --        | --        | --                                         | --         | --         |
| <i>Hyloxalus</i>    | <i>sauli</i>                | 148    | 19                             | 116.105263  | 115.486841 | 1                                  | 0.1908857 | 0.0000000 | 23                                         | 18.7988386 | 0.5472255  |
| <i>Hyloxalus</i>    | <i>sorditatus</i>           | 141    | 9                              | 27.3000000  | 3.9735235  | 3                                  | 0.1780263 | 0.0302022 | 9                                          | 9.2881726  | 0.2938481  |
| <i>Hyloxalus</i>    | <i>subpunctatus</i>         | 143    | --                             | --          | --         | --                                 | --        | --        | --                                         | --         | --         |
| <i>Hyloxalus</i>    | <i>toachi</i>               | 172    | 26                             | 38.9230769  | 10.7700439 | 4                                  | 0.0385339 | 0.0065460 | 29                                         | 2.2071720  | 0.1505216  |

Table S1 (Cont.) Temporal, spectral, and scaling variables from calls of poison frogs including phylogeny identifier (Phy ID), locality, call behavior, habit, temperature, size, number of recordings, multinote call features, units of repetition (UR), initial pulse-note, and middle pulse-note parameters.

| Genus                 | Species              | Phy ID | Pulse-Notes in Multinote Calls |             |            | Multinote Call Rate (Calls/second) |           |           | Multinote Pulse-Note Rate (Pulses/ second) |            |           |
|-----------------------|----------------------|--------|--------------------------------|-------------|------------|------------------------------------|-----------|-----------|--------------------------------------------|------------|-----------|
|                       |                      |        | N                              | $\bar{X}$   | SD         | N                                  | $\bar{X}$ | SD        | N                                          | $\bar{X}$  | SD        |
| <i>Hyloxalus</i>      | <i>vertebralis</i>   | 157    | --                             | --          | --         | --                                 | --        | --        | --                                         | --         | --        |
| <i>Hyloxalus</i>      | <i>vertebralis</i>   | 158    | --                             | --          | --         | --                                 | --        | --        | --                                         | --         | --        |
| <i>Hyloxalus</i>      | <i>yasuni</i>        | 147    | 78                             | 16.2307692  | 2.1737697  | 2                                  | 0.3847571 | 0.0194152 | 78                                         | 11.5282835 | 0.1119318 |
| <i>Hyloxalus</i>      | <i>yasuni</i>        | 145    | 49                             | 40.4800000  | 11.1871647 | 4                                  | 0.1912951 | 0.0331620 | 49                                         | 11.0336773 | 0.5430591 |
| <i>Hyloxalus</i>      | <i>yasuni</i>        | 146    | 22                             | 81.8000000  | 16.9941166 | 2                                  | 0.1406365 | 0.0066672 | 22                                         | 13.7743329 | 0.5030917 |
| <i>Mannophryne</i>    | <i>urticans</i>      | 25     | 5                              | 66.0000000  | 20.8710326 | 2                                  | 0.0448160 | 0.0123523 | 5                                          | 10.1225977 | 0.1786539 |
| <i>Mannophryne</i>    | <i>cordilleriana</i> | 20     | 3                              | 224.250000  | 152.222151 | 2                                  | 0.0259543 | 0.0064285 | 3                                          | 7.6772987  | 0.1187638 |
| <i>Mannophryne</i>    | <i>herminae</i>      | 19     | 427                            | 2.0000000   | 0.0000000  | 5                                  | 2.7820929 | 1.1180950 | 4                                          | 6.0189799  | 2.3096473 |
| <i>Mannophryne</i>    | <i>sp. Guatopo</i>   | 15     | 116                            | 2.0000000   | 0.0000000  | 3                                  | 2.1498444 | 0.4785025 | 2                                          | 3.8995024  | 0.5523165 |
| <i>Mannophryne</i>    | <i>leonardoi</i>     | 16     | 126                            | 4.1904762   | 0.3942443  | 1                                  | 0.6682955 | 0.0000000 | 126                                        | 14.8842989 | 0.3515856 |
| <i>Mannophryne</i>    | <i>olmonae</i>       | 12     | --                             | --          | --         | --                                 | --        | --        | --                                         | --         | --        |
| <i>Mannophryne</i>    | <i>orellana</i>      | 22     | 4                              | 67.5000000  | 10.2143690 | 2                                  | 0.0614265 | 0.0152391 | 4                                          | 11.0010610 | 0.0906612 |
| <i>Mannophryne</i>    | <i>orellana</i>      | 21     | 12                             | 134.7500000 | 28.6614248 | 2                                  | 0.0321683 | 0.0002632 | 14                                         | 5.7661132  | 0.5252025 |
| <i>Mannophryne</i>    | <i>riveroi</i>       | 13     | 7                              | 52.8571429  | 7.2670162  | 2                                  | 0.0243083 | 0.0022577 | 7                                          | 2.2241685  | 0.2880355 |
| <i>Mannophryne</i>    | <i>trinitatis</i>    | 17     | 47                             | 2.0000000   | 0.0000000  | 4                                  | 3.4731160 | 0.1387110 | 3                                          | 7.0372744  | 0.3491365 |
| <i>Mannophryne</i>    | <i>collaris</i>      | 23     | 6                              | 136.833333  | 23.7353464 | 1                                  | 0.0341116 | 0.0000000 | 6                                          | 6.0546896  | 0.3834207 |
| <i>Mannophryne</i>    | <i>collaris</i>      | 24     | 4                              | 133.7500000 | 16.5403547 | 1                                  | 0.0365671 | 0.0000000 | 4                                          | 7.0489759  | 0.7440933 |
| <i>Mannophryne</i>    | <i>venezuelensis</i> | 18     | 9                              | 22.7777778  | 1.5634719  | 2                                  | 0.1212549 | 0.0227931 | 9                                          | 6.0979134  | 0.1343702 |
| <i>Mannophryne</i>    | <i>vulcano</i>       | 14     | 47                             | 2.0000000   | 0.0000000  | 1                                  | 2.3261694 | 0.0000000 | 1                                          | 4.6891544  | 0.0000000 |
| <i>Mannophryne</i>    | <i>yustizi</i>       | 26     | 8                              | 102.2500000 | 13.8331899 | 3                                  | 0.0512471 | 0.0068247 | 8                                          | 11.1859592 | 0.4757013 |
| <i>Phyllobates</i>    | <i>aurotaenia</i>    | 108    | 10                             | 62.2000000  | 4.8944413  | 1                                  | 0.0868847 | 0.0000000 | 10                                         | 15.2191902 | 0.0458307 |
| <i>Phyllobates</i>    | <i>lugubris</i>      | 111    | 10                             | 64.3000000  | 5.8128211  | 3                                  | 0.0875768 | 0.0103397 | 10                                         | 14.4242582 | 0.3278878 |
| <i>Phyllobates</i>    | <i>lugubris</i>      | 112    | 6                              | 89.8333333  | 14.5796662 | 2                                  | 0.0757964 | 0.0022881 | 6                                          | 15.6591531 | 0.0592865 |
| <i>Phyllobates</i>    | <i>terribilis</i>    | 109    | 9                              | 39.0000000  | 7.5166482  | 1                                  | 0.1219017 | 0.0000000 | 9                                          | 9.8999753  | 0.0945383 |
| <i>Phyllobates</i>    | <i>vittatus</i>      | 110    | 51                             | 74.8627451  | 10.2723310 | 6                                  | 0.0594456 | 0.0101265 | 51                                         | 13.9846988 | 0.3618635 |
| <i>Rheobates</i>      | <i>palmatus</i>      | 28     | 12                             | 182.7500000 | 52.4285228 | 4                                  | 0.0252537 | 0.0054323 | 12                                         | 7.2260913  | 0.8319726 |
| <i>Rheobates</i>      | <i>palmatus</i>      | 27     | 7                              | 300.2500000 | 100.626253 | 1                                  | 0.0220374 | 0.0000000 | 7                                          | 9.3531488  | 0.4311224 |
| <i>Silverstoneia</i>  | <i>flotator</i>      | 62     | 3                              | 135.666666  | 23.8607069 | 1                                  | 0.0175134 | 0.0000000 | 5                                          | 3.3623619  | 0.4041495 |
| <i>Silverstoneia</i>  | <i>flotator</i>      | 63     | 7                              | 58.8750000  | 11.0121686 | 1                                  | 0.0706115 | 0.0000000 | 8                                          | 4.3211830  | 0.1895519 |
| <i>Silverstoneia</i>  | <i>nubicola</i>      | 66     | 41                             | 18.5609756  | 2.4397621  | 5                                  | 0.2936774 | 0.0239820 | 43                                         | 9.3497839  | 0.4217109 |
| <i>Silverstoneia</i>  | <i>nubicola</i>      | 65     | 1                              | 131.000000  | 0.0000000  | --                                 | --        | --        | 2                                          | 2.3356569  | 0.0672923 |
| <i>Silverstoneia</i>  | <i>nubicola</i>      | 64     | 6                              | 111.5000000 | 49.8547891 | 4                                  | 0.1210157 | 0.0721295 | 9                                          | 11.4138255 | 0.5252124 |
| <i>Anomaloglossus</i> | <i>stepheni</i>      | NA     | 25                             | 7.0000000   | 1.3228757  | 3                                  | 0.8463270 | 0.1134385 | 23                                         | 18.4037755 | 0.2017090 |
| <i>Allobates</i>      | <i>goianus</i>       | NA     | --                             | --          | --         | --                                 | --        | --        | --                                         | --         | --        |
| <i>Hyloxalus</i>      | <i>anthracinus</i>   | NA     | --                             | --          | --         | --                                 | --        | --        | --                                         | --         | --        |

Table S1 (Cont.) Temporal, spectral, and scaling variables from calls of poison frogs including phylogeny identifier (Phy ID), locality, call behavior, habit, temperature, size, number of recordings, multinote call features, units of repetition (UR), initial pulse-note, and middle pulse-note parameters.

| Genus            | Species                        | Phy ID | Pulses in UR |      | UR Duration (s) |           |           | Interval between UR (s) |           |            | UR Rate (UR / second) |            |           |
|------------------|--------------------------------|--------|--------------|------|-----------------|-----------|-----------|-------------------------|-----------|------------|-----------------------|------------|-----------|
|                  |                                |        | N            | Pul. | N               | $\bar{X}$ | SD        | N                       | $\bar{X}$ | SD         | N                     | $\bar{X}$  | SD        |
| <i>Allobates</i> | <i>algorei</i>                 | 60     | 3            | 1    | 114             | 0.0490263 | 0.0041252 | 109                     | 0.8242110 | 0.3897468  | 3                     | 1.2437292  | 0.0977481 |
| <i>Allobates</i> | <i>brunneus</i>                | 37     | 6            | 1    | 261             | 0.0459042 | 0.0070989 | 255                     | 0.4750627 | 0.3317661  | 6                     | 2.3100940  | 0.1624029 |
| <i>Allobates</i> | <i>caeruleodactylus</i>        | 48     | 2            | 1    | 515             | 0.0280641 | 0.0031865 | 477                     | 0.4983249 | 0.1212178  | 2                     | 1.8852052  | 0.1605131 |
| <i>Allobates</i> | <i>crombiei</i>                | 52     | 49           | 1    | 662             | 0.0384909 | 0.0051547 | 610                     | 0.0884131 | 0.0081945  | 49                    | 11.9157602 | 1.1972175 |
| <i>Allobates</i> | <i>femorialis</i>              | 43     | 10           | 1    | 788             | 0.0967487 | 0.0206133 | 769                     | 0.2905137 | 0.1940869  | 10                    | 3.4824782  | 0.5372889 |
| <i>Allobates</i> | <i>femorialis</i>              | 46     | 1            | 4    | 24              | 0.3882917 | 0.0080460 | 22                      | 0.7530455 | 0.0212972  | 1                     | 1.3290402  | 0.0000000 |
| <i>Allobates</i> | <i>femorialis</i>              | 44     | 1            | 4    | 15              | 0.5146667 | 0.0080593 | 12                      | 1.1808333 | 0.0925270  | 1                     | 0.8338197  | 0.0000000 |
| <i>Allobates</i> | <i>femorialis</i>              | 40     | 1            | 4    | 42              | 0.3638333 | 0.0047827 | 39                      | 0.8822051 | 0.1396764  | 1                     | 1.1473250  | 0.0000000 |
| <i>Allobates</i> | <i>femorialis</i>              | 41     | 4            | 2    | 249             | 0.1783775 | 0.0187813 | 243                     | 0.5500864 | 0.0709239  | 4                     | 1.8242176  | 0.0952533 |
| <i>Allobates</i> | <i>femorialis</i>              | 45     | 1            | 4    | 38              | 0.5156842 | 0.0119189 | 36                      | 0.9795000 | 0.0540336  | 1                     | 1.0174857  | 0.0000000 |
| <i>Allobates</i> | <i>granti</i>                  | 49     | 5            | 2    | 68              | 0.0842206 | 0.0040624 | 63                      | 0.2668730 | 0.0403834  | 5                     | 3.7822953  | 0.2187595 |
| <i>Allobates</i> | <i>humilis</i>                 | 59     | 1            | 1    | 21              | 0.0388571 | 0.0025939 | 20                      | 0.2824000 | 0.03222023 | 1                     | 3.5410765  | 0.0000000 |
| <i>Allobates</i> | <i>insperatus</i>              | 54     | 15           | 1    | 237             | 0.0325485 | 0.0082664 | 221                     | 0.0808371 | 0.0099823  | 15                    | 12.2113454 | 1.0831765 |
| <i>Allobates</i> | <i>aff. insperatus</i>         | 55     | 2            | 1    | 73              | 0.0304658 | 0.0038009 | 71                      | 0.0774930 | 0.0062767  | 2                     | 12.8643546 | 0.1314688 |
| <i>Allobates</i> | <i>juanii</i>                  | 47     | 9            | 2-3  | 138             | 0.5196739 | 0.2512094 | 119                     | 1.6903277 | 0.3188039  | 9                     | 0.5786450  | 0.0567918 |
| <i>Allobates</i> | <i>kingsburyi</i>              | 39     | 19           | 2    | 961             | 0.1206774 | 0.0227540 | 949                     | 0.4880390 | 0.1846691  | 19                    | 2.0790707  | 0.2327674 |
| <i>Allobates</i> | <i>marchesianus</i>            | 50     | 3            | 1    | 378             | 0.0523915 | 0.0064038 | 350                     | 0.2521829 | 0.0753400  | 3                     | 2.9675705  | 0.4512645 |
| <i>Allobates</i> | <i>masniger</i>                | 58     | 5            | 1    | 611             | 0.0635205 | 0.0078853 | 590                     | 0.3106068 | 0.1290244  | 5                     | 3.4783565  | 0.2941427 |
| <i>Allobates</i> | <i>nidicola</i>                | 36     | 2            | 1    | 645             | 0.0376248 | 0.0180267 | 631                     | 0.2401981 | 0.0338020  | 2                     | 3.8105731  | 0.6020460 |
| <i>Allobates</i> | <i>olfersoides</i>             | 1      | 1            | 1    | 260             | 0.0430308 | 0.0048314 | 258                     | 0.3684922 | 0.0385468  | 1                     | 2.7103674  | 0.0000000 |
| <i>Allobates</i> | <i>ornatus</i>                 | 51     | 2            | 1    | 195             | 0.0363333 | 0.0055443 | 178                     | 0.4669438 | 0.1032403  | 2                     | 2.1636347  | 0.0451750 |
| <i>Allobates</i> | <i>sp. Ducke</i>               | 61     | 12           | 1    | 807             | 0.0438265 | 0.0075870 | 750                     | 0.3517173 | 0.2062386  | 12                    | 2.7988149  | 0.4932524 |
| <i>Allobates</i> | <i>sp. Neblina</i>             | 29     | 1            | 1    | 10              | 0.0288000 | 0.0042111 | 9                       | 9.7587778 | 4.7187411  | 1                     | 0.1024718  | 0.0000000 |
| <i>Allobates</i> | <i>sp. Negro</i>               | 38     | 2            | 1    | 1075            | 0.0367572 | 0.0035666 | 1050                    | 0.1295057 | 0.1555509  | 2                     | 8.7651744  | 0.3973649 |
| <i>Allobates</i> | <i>sp. Shushufindi</i>         | 53     | 4            | 1    | 47              | 0.0795957 | 0.0054120 | 43                      | 0.3731628 | 0.0654028  | 4                     | 2.7235773  | 0.3121869 |
| <i>Allobates</i> | <i>sp. Treviso (sp. small)</i> | 57     | 2            | 1    | 333             | 0.0353213 | 0.0043000 | 332                     | 0.4178404 | 0.1969509  | 2                     | 2.3564651  | 0.1486610 |
| <i>Allobates</i> | <i>talamancae</i>              | 34     | 5            | 2    | 45              | 0.1088889 | 0.0052450 | 44                      | 0.3524865 | 0.0265609  | 5                     | 2.6641171  | 0.1639281 |
| <i>Allobates</i> | <i>talamancae</i>              | 32     | 6            | 2    | 17              | 0.1975294 | 0.0536751 | 13                      | 0.5920769 | 0.1033130  | 6                     | 1.6023410  | 0.2040429 |
| <i>Allobates</i> | <i>talamancae</i>              | 35     | 12           | 2    | 93              | 0.0791075 | 0.0336340 | 83                      | 0.3527590 | 0.1044714  | 12                    | 2.8357884  | 0.4463151 |
| <i>Allobates</i> | <i>talamancae</i>              | 31     | 6            | 2    | 101             | 0.1357030 | 0.0321641 | 89                      | 0.6108876 | 0.1675383  | 6                     | 1.6291103  | 0.2292149 |
| <i>Allobates</i> | <i>talamancae</i>              | 33     | 5            | 2    | 36              | 0.1210278 | 0.0118406 | 31                      | 0.3215806 | 0.0444880  | 5                     | 3.1290539  | 0.1417523 |
| <i>Allobates</i> | <i>talamancae</i>              | 30     | 2            | 2    | 43              | 0.1186512 | 0.0087038 | 31                      | 0.4249355 | 0.0431864  | 2                     | 2.3323566  | 0.1448522 |
| <i>Allobates</i> | <i>trilineatus</i>             | 56     | 13           | 2    | 153             | 0.0686471 | 0.0054573 | 140                     | 0.2818143 | 0.0743442  | 13                    | 3.5397071  | 0.3172536 |
| <i>Allobates</i> | <i>zaparo</i>                  | 42     | 62           | 2    | 335             | 0.1848955 | 0.0119218 | 266                     | 0.3126316 | 0.0212511  | 62                    | 3.2162652  | 0.1993844 |
| <i>Ameerega</i>  | <i>altamazonica</i>            | 103    | 2            | 1    | 456             | 0.0617697 | 0.0067513 | 445                     | 0.5694360 | 0.1049241  | 2                     | 1.7218342  | 0.1480156 |



Table S1 (Cont.) Temporal, spectral, and scaling variables from calls of poison frogs including phylogeny identifier (Phy ID), locality, call behavior, habit, temperature, size, number of recordings, multinote call features, units of repetition (UR), initial pulse-note, and middle pulse-note parameters.

| Genus                 | Species                  | Phy ID | Pulses in UR |      | UR Duration (s) |           |           | Interval between UR (s) |           |           | UR Rate (UR / second) |            |         |
|-----------------------|--------------------------|--------|--------------|------|-----------------|-----------|-----------|-------------------------|-----------|-----------|-----------------------|------------|---------|
|                       |                          |        | N            | Pul. | N               | $\bar{X}$ | SD        | N                       | $\bar{X}$ | SD        | N                     | $\bar{X}$  | SD      |
| <i>Ameerega</i>       | <i>bassleri</i>          | 89     | 10           | 1    | 205             | 0.1744293 | 0.0484866 | 182                     | 0.4838022 | 0.0718699 | 10                    | 2.0688581  | 0.18891 |
| <i>Ameerega</i>       | <i>bilinguis</i>         | 87     | 17           | 2    | 1888            | 0.0995064 | 0.0063975 | 1871                    | 0.2167600 | 0.0187995 | 17                    | 4.5927532  | 0.20440 |
| <i>Ameerega</i>       | <i>braccata</i>          | 94     | 1            | 1    | 79              | 0.0319747 | 0.0029307 | 78                      | 0.1898590 | 0.0130052 | 1                     | 5.2670673  | 0.00000 |
| <i>Ameerega</i>       | <i>cainarachi</i>        | 102    | 33           | 1    | 469             | 0.0349765 | 0.0073500 | 451                     | 0.1315876 | 0.0257304 | 33                    | 8.2255968  | 0.61226 |
| <i>Ameerega</i>       | <i>flavopicta</i>        | 95     | 60           | 1    | 544             | 0.0159485 | 0.0067068 | 484                     | 0.0204029 | 0.0062197 | 60                    | 49.0092191 | 0.67617 |
| <i>Ameerega</i>       | <i>hahneli</i>           | 96     | 1            | 1    | 42              | 0.0355238 | 0.0067471 | 38                      | 0.1538684 | 0.0312273 | 1                     | 6.0170238  | 0.00000 |
| <i>Ameerega</i>       | <i>hahneli</i>           | 97     | 4            | 1    | 1693            | 0.0174572 | 0.0030843 | 1650                    | 0.2392461 | 0.0546046 | 4                     | 4.0801635  | 0.82127 |
| <i>Ameerega</i>       | <i>hahneli</i>           | 98     | 1            | 1    | 146             | 0.0164452 | 0.0025812 | 145                     | 0.1180414 | 0.0125753 | 1                     | 8.4716055  | 0.00000 |
| <i>Ameerega</i>       | <i>hahneli</i>           | 99     | 1            | 1    | 594             | 0.0142761 | 0.0012794 | 568                     | 0.1467852 | 0.0259582 | 1                     | 6.6263712  | 0.00000 |
| <i>Ameerega</i>       | <i>ignipedis</i>         | 90     | 1            | 1    | 22              | 0.0946818 | 0.0133395 | 21                      | 0.6019048 | 0.1003962 | 1                     | 1.6613924  | 0.00000 |
| <i>Ameerega</i>       | <i>parvula</i>           | 86     | 4            | 1    | 757             | 0.0128309 | 0.0033619 | 752                     | 0.0398032 | 0.0022097 | 4                     | 24.8451822 | 0.50339 |
| <i>Ameerega</i>       | <i>petersi</i>           | 101    | 23           | 1    | 272             | 0.0321397 | 0.0061172 | 248                     | 0.1185766 | 0.0186453 | 23                    | 8.5176197  | 0.17362 |
| <i>Ameerega</i>       | <i>picta</i>             | 91     | 1            | 1    | 46              | 0.0508261 | 0.0043884 | 45                      | 0.3673778 | 0.0338481 | 1                     | 2.7219937  | 0.00000 |
| <i>Ameerega</i>       | <i>picta</i>             | 92     | 5            | 1    | 1212            | 0.0501840 | 0.0083966 | 1186                    | 0.3142664 | 0.0285930 | 5                     | 2.9810194  | 0.21181 |
| <i>Ameerega</i>       | <i>picta</i>             | 93     | 1            | 1    | 322             | 0.0277547 | 0.0027455 | 321                     | 0.1536231 | 0.0102056 | 1                     | 6.5094397  | 0.00000 |
| <i>Ameerega</i>       | <i>pongoensis</i>        | 88     | 4            | 1    | 7               | 0.0772857 | 0.0129578 | 4                       | 2.3110000 | 0.3918393 | 4                     | 0.4417345  | 0.07152 |
| <i>Ameerega</i>       | <i>silverstonei</i>      | 85     | 2            | 1    | 199             | 0.0823518 | 0.0149297 | 197                     | 0.2947056 | 0.0102228 | 2                     | 3.3929068  | 0.01340 |
| <i>Ameerega</i>       | <i>smaragdina</i>        | 100    | 1            | 2    | 47              | 0.1840638 | 0.0065488 | 46                      | 0.3991304 | 0.0178520 | 1                     | 2.5054466  | 0.00000 |
| <i>Ameerega</i>       | <i>trivittata</i>        | 105    | 2            | 1    | 95              | 0.0698000 | 0.0122053 | 93                      | 0.2198387 | 0.0140165 | 2                     | 4.6059090  | 0.21100 |
| <i>Ameerega</i>       | <i>trivittata</i>        | 107    | 3            | 1    | 114             | 0.0615263 | 0.0098719 | 112                     | 0.2077768 | 0.0095764 | 3                     | 4.7875606  | 0.09749 |
| <i>Ameerega</i>       | <i>trivittata</i>        | 106    | 33           | 1    | 552             | 0.0610308 | 0.0113399 | 547                     | 0.2430530 | 0.0708315 | 33                    | 4.3562288  | 0.24624 |
| <i>Ameerega</i>       | <i>trivittata</i>        | 104    | 2            | 1    | 73              | 0.0502192 | 0.0086156 | 71                      | 0.1606620 | 0.0093074 | 2                     | 6.2172506  | 0.01637 |
| <i>Anomaloglossus</i> | <i>baeobatrachus</i>     | 3      | 19           | 1    | 274             | 0.0262847 | 0.0032535 | 255                     | 0.0659020 | 0.0018913 | 19                    | 15.1712987 | 0.08983 |
| <i>Anomaloglossus</i> | <i>degranvillei</i>      | 4      | 2            | 1    | 32              | 0.1100313 | 0.0066453 | 30                      | 1.4212333 | 0.1068062 | 2                     | 0.6842356  | 0.04273 |
| <i>Anomaloglossus</i> | <i>rufulus</i>           | 5      | 2            | 1    | 22              | 0.0529091 | 0.0066110 | 19                      | 0.1653158 | 0.0153625 | 2                     | 6.4207316  | 0.65054 |
| <i>Anomaloglossus</i> | <i>verbeeksnyderorum</i> | 2      | 12           | 1    | 2215            | 0.0278221 | 0.0052535 | 2185                    | 0.1116999 | 0.0123253 | 12                    | 8.9496862  | 0.13602 |
| <i>Aromobates</i>     | <i>meridensis</i>        | 7      | 1            | 1    | 20              | 0.0598000 | 0.0051360 | 18                      | 0.1245556 | 0.0107332 | 1                     | 8.0782313  | 0.00000 |
| <i>Aromobates</i>     | <i>saltuensis</i>        | 11     | 3            | 2    | 273             | 0.1388425 | 0.0049372 | 270                     | 0.7315148 | 0.0928819 | 3                     | 1.4110161  | 0.10157 |
| <i>Aromobates</i>     | <i>cannatellai</i>       | 9      | 149          | 1    | 149             | 0.0452617 | 0.0075618 | 147                     | 0.1868163 | 0.0341463 | 149                   | 5.4372756  | 0.13959 |
| <i>Aromobates</i>     | aff. <i>saltuensis</i>   | 10     | 304          | 1    | 304             | 0.1028487 | 0.0243982 | 301                     | 0.7278405 | 0.1901579 | 304                   | 1.3942101  | 0.03969 |
| <i>Aromobates</i>     | <i>ericksonae</i>        | 8      | 9            | 2    | 185             | 0.1269514 | 0.0133410 | 171                     | 1.8741579 | 0.4369225 | 9                     | 0.4753256  | 0.04051 |
| <i>Aromobates</i>     | <i>ornatissimus</i>      | 6      | 3            | 1    | 21              | 0.0890476 | 0.0116382 | 9                       | 2.8993333 | 0.4837280 | 3                     | 0.3184606  | 0.03329 |
| <i>Colostethus</i>    | <i>argyrogaster</i>      | 83     | 1            | 1    | 29              | 0.1172069 | 0.0122951 | 28                      | 1.1983333 | 0.1682091 | 1                     | 0.8119708  | 0.00000 |
| <i>Colostethus</i>    | <i>fraterdanieli</i>     | 81     | 6            | 1    | 397             | 0.0632494 | 0.0109168 | 390                     | 0.5819487 | 0.0908494 | 6                     | 1.7155691  | 0.06262 |
| <i>Colostethus</i>    | <i>fraterdanieli</i>     | 82     | 11           | 1    | 869             | 0.0601738 | 0.0236399 | 864                     | 0.4029410 | 0.0700993 | 11                    | 2.2626010  | 0.39549 |

Table S1 (Cont.) Temporal, spectral, and scaling variables from calls of poison frogs including phylogeny identifier (Phy ID), locality, call behavior, habit, temperature, size, number of recordings, multinote call features, units of repetition (UR), initial pulse-note, and middle pulse-note parameters.

| Genus               | Species                  | Phy ID | Pulses in UR |      | UR Duration (s) |           |           | Interval between UR (s) |           |           | UR Rate (UR / second) |             |            |
|---------------------|--------------------------|--------|--------------|------|-----------------|-----------|-----------|-------------------------|-----------|-----------|-----------------------|-------------|------------|
|                     |                          |        | N            | Pul. | N               | $\bar{X}$ | SD        | N                       | $\bar{X}$ | SD        | N                     | $\bar{X}$   | SD         |
| <i>Colostethus</i>  | <i>fugax</i>             | 84     | 5            | 1    | 131             | 0.0980458 | 0.0082842 | 121                     | 2.3206777 | 0.6076704 | 5                     | 0.4084228   | 0.0770299  |
| <i>Colostethus</i>  | <i>panamansis</i>        | 76     | 6            | 2-3  | 71              | 0.2219577 | 0.0599277 | 60                      | 1.3570500 | 0.1661618 | 6                     | 0.7113362   | 0.0690464  |
| <i>Colostethus</i>  | <i>panamansis</i>        | 75     | 4            | 2-3  | 96              | 0.1599271 | 0.0380941 | 78                      | 0.8214103 | 0.1112288 | 4                     | 1.2211562   | 0.1030549  |
| <i>Colostethus</i>  | <i>pratti</i>            | 80     | 74           | 1    | 389             | 0.0723676 | 0.0098243 | 310                     | 0.2003000 | 0.0140718 | 74                    | 4.9319271   | 0.2323629  |
| <i>Colostethus</i>  | <i>pratti</i>            | 79     | 24           | 1    | 309             | 0.0604595 | 0.0085692 | 283                     | 0.2134770 | 0.0624552 | 24                    | 4.7115051   | 0.3774403  |
| <i>Colostethus</i>  | <i>pratti</i>            | 77     | 4            | 1    | 23              | 0.0675217 | 0.0076210 | 19                      | 0.1933684 | 0.0265627 | 4                     | 5.1710273   | 0.1844375  |
| <i>Colostethus</i>  | <i>aff. pratti</i>       | 78     | 35           | 1    | 215             | 0.0441163 | 0.0088598 | 178                     | 0.1214888 | 0.0138332 | 35                    | 7.9751712   | 0.6328982  |
| <i>Dendrobates</i>  | <i>auratus</i>           | 116    | 2            | 1    | 431             | 0.0065963 | 0.0017130 | 428                     | 0.0159533 | 0.0011152 | 2                     | 62.1740951  | 4.4407802  |
| <i>Dendrobates</i>  | <i>bombetes</i>          | 126    | 12           | 1    | 2603            | 0.0023265 | 0.0011215 | 2603                    | 0.0061306 | 0.0024480 | 12                    | 162.5751563 | 17.4081798 |
| <i>Dendrobates</i>  | <i>captivus</i>          | 125    | 32           | 1    | 398             | 0.0144347 | 0.0024556 | 366                     | 0.0201667 | 0.0034159 | 32                    | 49.6663073  | 1.9461121  |
| <i>Dendrobates</i>  | <i>castaneoticus</i>     | 114    | 2            | 1    | 690             | 0.0056029 | 0.0011141 | 688                     | 0.0117747 | 0.0013305 | 2                     | 84.9277983  | 0.0444782  |
| <i>Dendrobates</i>  | <i>claudiae</i>          | 130    | 4            | 1    | 283             | 0.0064841 | 0.0015096 | 280                     | 0.0160893 | 0.0017256 | 4                     | 62.1336390  | 5.6203158  |
| <i>Dendrobates</i>  | <i>defleri</i>           | 133    | 5            | 1    | 250             | 0.0052560 | 0.0010012 | 244                     | 0.0107787 | 0.0043405 | 5                     | 94.6992434  | 3.5610933  |
| <i>Dendrobates</i>  | <i>fantasticus</i>       | 137    | 7            | 1    | 345             | 0.0091594 | 0.0059646 | 326                     | 0.0155767 | 0.0070736 | 7                     | 44.4037064  | 1.0194858  |
| <i>Dendrobates</i>  | <i>galactonotus</i>      | 113    | 1            | 1    | 669             | 0.0071465 | 0.0014772 | 667                     | 0.0162144 | 0.0045020 | 1                     | 61.4503446  | 0.0000000  |
| <i>Dendrobates</i>  | <i>granuliferus</i>      | 119    | 42           | 1    | 2400            | 0.0036304 | 0.0007187 | 2358                    | 0.0068863 | 0.0011640 | 42                    | 145.6305317 | 4.3979319  |
| <i>Dendrobates</i>  | <i>histrionicus</i>      | 121    | 29           | 1    | 889             | 0.0026625 | 0.0008198 | 856                     | 0.0040479 | 0.0013382 | 29                    | 244.9677212 | 8.2983524  |
| <i>Dendrobates</i>  | <i>imitator</i>          | 131    | 61           | 1    | 1479            | 0.0105680 | 0.0032934 | 1414                    | 0.0288147 | 0.0031210 | 61                    | 34.7643041  | 1.7976659  |
| <i>Dendrobates</i>  | <i>lamasi (sirensis)</i> | 132    | 4            | 1    | 128             | 0.0093125 | 0.0016494 | 124                     | 0.0408065 | 0.0045276 | 4                     | 24.5410479  | 0.4371967  |
| <i>Dendrobates</i>  | <i>leucomelas</i>        | 118    | 17           | 1    | 2700            | 0.0147067 | 0.0044143 | 2684                    | 0.0603279 | 0.0075579 | 17                    | 16.6554148  | 0.8246094  |
| <i>Dendrobates</i>  | <i>minutus</i>           | 128    | 1            | 1    | 93              | 0.0037419 | 0.0010825 | 91                      | 0.0120110 | 0.0011303 | 1                     | 83.4088849  | 0.0000000  |
| <i>Dendrobates</i>  | <i>mysteriosus</i>       | 124    | 19           | 1    | 1417            | 0.0103126 | 0.0020750 | 1398                    | 0.0196896 | 0.0023191 | 19                    | 51.0486091  | 3.8430830  |
| <i>Dendrobates</i>  | <i>pumilio</i>           | 123    | 147          | 1    | 1784            | 0.0018240 | 0.0005404 | 1660                    | 0.0027355 | 0.0006331 | 147                   | 353.4428188 | 31.5096991 |
| <i>Dendrobates</i>  | <i>pumilio</i>           | 122    | 30           | 1    | 506             | 0.0029743 | 0.0007639 | 476                     | 0.0046996 | 0.0016708 | 30                    | 213.4422608 | 8.9176284  |
| <i>Dendrobates</i>  | <i>reticulatus</i>       | 136    | 7            | 1    | 489             | 0.0015112 | 0.0005085 | 479                     | 0.0037098 | 0.0018368 | 7                     | 271.9132962 | 10.8302223 |
| <i>Dendrobates</i>  | <i>sp. Quibdo</i>        | 129    | 7            | 1    | 1067            | 0.0032418 | 0.0012530 | 1055                    | 0.0088682 | 0.0008551 | 7                     | 110.5966878 | 3.7445220  |
| <i>Dendrobates</i>  | <i>sylvaticus</i>        | 120    | 26           | 1    | 704             | 0.0021960 | 0.0007284 | 704                     | 0.0088125 | 0.0302199 | 26                    | 302.9623606 | 9.7313762  |
| <i>Dendrobates</i>  | <i>tinctorius</i>        | 117    | 4            | 1    | 486             | 0.0022160 | 0.0004981 | 482                     | 0.0071846 | 0.0006327 | 4                     | 139.1792290 | 0.4157792  |
| <i>Dendrobates</i>  | <i>truncatus</i>         | 115    | 5            | 1    | 775             | 0.0102581 | 0.0023990 | 763                     | 0.0196763 | 0.0016140 | 5                     | 50.7794290  | 3.3794130  |
| <i>Dendrobates</i>  | <i>uakarii</i>           | 138    | 5            | 1    | 65              | 0.0121692 | 0.0015966 | 60                      | 0.0177167 | 0.0024570 | 5                     | 56.4668852  | 2.6214740  |
| <i>Dendrobates</i>  | <i>variabilis</i>        | 135    | 12           | 1    | 1423            | 0.0013718 | 0.0004863 | 1407                    | 0.0039211 | 0.0026450 | 12                    | 249.2756047 | 16.9270958 |
| <i>Dendrobates</i>  | <i>ventrimaculatus</i>   | 134    | 3            | 1    | 614             | 0.0019169 | 0.0008948 | 607                     | 0.0032883 | 0.0018565 | 3                     | 301.6515732 | 27.5988263 |
| <i>Dendrobates</i>  | <i>ventrimaculatus</i>   | 139    | 11           | 1    | 1017            | 0.0012124 | 0.0004092 | 1004                    | 0.0057689 | 0.0040839 | 11                    | 169.8654632 | 21.2883870 |
| <i>Dendrobates</i>  | <i>virolinensis</i>      | 127    | 12           | 1    | 2376            | 0.0019621 | 0.0009011 | 2364                    | 0.0093003 | 0.0048463 | 12                    | 108.1530357 | 12.8018365 |
| <i>Epipedobates</i> | <i>anthonyi</i>          | 71     | 8            | 1    | 486             | 0.0286461 | 0.0043266 | 478                     | 0.0611067 | 0.0048217 | 8                     | 16.3754780  | 0.4639296  |

Table S1 (Cont.) Temporal, spectral, and scaling variables from calls of poison frogs including phylogeny identifier (Phy ID), locality, call behavior, habit, temperature, size, number of recordings, multinote call features, units of repetition (UR), initial pulse-note, and middle pulse-note parameters.

| Genus               | Species                     | Phy ID | Pulses in UR |      | UR Duration (s) |           |           | Interval between UR (s) |           |           | UR Rate (UR / second) |            |            |
|---------------------|-----------------------------|--------|--------------|------|-----------------|-----------|-----------|-------------------------|-----------|-----------|-----------------------|------------|------------|
|                     |                             |        | N            | Pul. | N               | $\bar{X}$ | SD        | N                       | $\bar{X}$ | SD        | N                     | $\bar{X}$  | SD         |
| <i>Epipedobates</i> | <i>anthonyi</i>             | 70     | 22           | 1    | 1233            | 0.0251930 | 0.0050576 | 1211                    | 0.0531759 | 0.0073832 | 22                    | 19.0288307 | 0.8268543  |
| <i>Epipedobates</i> | <i>boulengeri</i>           | 67     | 41           | 1    | 306             | 0.0133464 | 0.0024410 | 306                     | 0.0232516 | 0.0025464 | 41                    | 42.2707890 | 1.2752533  |
| <i>Epipedobates</i> | <i>espinosai</i>            | 69     | 15           | 1    | 738             | 0.0086531 | 0.0033577 | 723                     | 0.0220844 | 0.0019833 | 15                    | 44.4095942 | 2.6341783  |
| <i>Epipedobates</i> | <i>machalilla</i>           | 73     | 10           | 1    | 1194            | 0.0181633 | 0.0043533 | 1184                    | 0.0568919 | 0.0160798 | 10                    | 17.5832741 | 0.3664280  |
| <i>Epipedobates</i> | <i>machalilla</i>           | 72     | 31           | 1    | 4120            | 0.0121066 | 0.0021429 | 4087                    | 0.0334705 | 0.0017737 | 31                    | 29.8836117 | 0.2443073  |
| <i>Epipedobates</i> | <i>sp. F darwinwallacei</i> | 68     | 21           | 1    | 1403            | 0.0097313 | 0.0023150 | 1382                    | 0.0286751 | 0.0036495 | 21                    | 35.1054082 | 4.0190783  |
| <i>Epipedobates</i> | <i>tricolor</i>             | 74     | 14           | 1    | 826             | 0.0161780 | 0.0024083 | 818                     | 0.0344230 | 0.0027275 | 14                    | 28.8393939 | 0.4444189  |
| <i>Hyloxalus</i>    | <i>sp. Agua Azul</i>        | 142    | 2            | 1    | 160             | 0.0227125 | 0.0045272 | 155                     | 0.1302194 | 0.0284558 | 2                     | 7.8891719  | 0.3006070  |
| <i>Hyloxalus</i>    | <i>awa</i>                  | 171    | 25           | 1    | 503             | 0.0633559 | 0.0110813 | 478                     | 0.1566778 | 0.0178714 | 25                    | 6.4203545  | 0.1986079  |
| <i>Hyloxalus</i>    | <i>azureiventris</i>        | 165    | 5            | 1    | 758             | 0.0160251 | 0.0051205 | 753                     | 0.0654821 | 0.0032726 | 5                     | 15.2958541 | 0.1040519  |
| <i>Hyloxalus</i>    | <i>bocagei</i>              | 151    | 5            | 2    | 592             | 0.1213209 | 0.0050253 | 589                     | 0.2888795 | 0.0346342 | 5                     | 3.3516847  | 0.3114360  |
| <i>Hyloxalus</i>    | <i>bocagei</i>              | 150    | 6            | 2    | 716             | 0.1319204 | 0.0079792 | 703                     | 0.3301380 | 0.0445393 | 6                     | 2.9338353  | 0.2588083  |
| <i>Hyloxalus</i>    | <i>craspedoceph</i>         | 166    | 165          | 1    | 325             | 0.0055754 | 0.0009677 | 312                     | 0.0070353 | 0.0007991 | 165                   | 142.339817 | 0.8128326  |
| <i>Hyloxalus</i>    | <i>aff. delatorreae</i>     | 163    | 16           | 1    | 117             | 0.0070940 | 0.0019297 | 101                     | 0.0098020 | 0.0018602 | 16                    | 103.605265 | 5.4213506  |
| <i>Hyloxalus</i>    | <i>delatorreae</i>          | 162    | 43           | 1    | 277             | 0.0074440 | 0.0022955 | 238                     | 0.0105378 | 0.0023467 | 43                    | 100.653729 | 4.8957153  |
| <i>Hyloxalus</i>    | <i>elachyhistus</i>         | 169    | 3            | 1    | 315             | 0.0557238 | 0.0189679 | 309                     | 1.1413366 | 0.2042063 | 3                     | 0.8193312  | 0.0802109  |
| <i>Hyloxalus</i>    | <i>elachyhistus</i>         | 168    | 3            | 1    | 171             | 0.1061754 | 0.0063574 | 167                     | 0.8047186 | 0.1955958 | 3                     | 1.2376683  | 0.0819356  |
| <i>Hyloxalus</i>    | <i>erythromos</i>           | 140    | 46           | 1    | 436             | 0.0045459 | 0.0015611 | 433                     | 0.0058014 | 0.0018238 | 46                    | 170.602707 | 19.0604383 |
| <i>Hyloxalus</i>    | <i>infraguttatus</i>        | 170    | 25           | 1    | 1640            | 0.0609732 | 0.0061952 | 1610                    | 0.4632348 | 0.1350713 | 25                    | 2.0920895  | 0.1927151  |
| <i>Hyloxalus</i>    | <i>insulatus</i>            | 167    | 5            | 1    | 374             | 0.0807594 | 0.0083734 | 361                     | 0.4099972 | 0.0923916 | 5                     | 2.2566664  | 0.2257827  |
| <i>Hyloxalus</i>    | <i>italoi</i>               | 144    | 66           | 1    | 2353            | 0.0402197 | 0.0065396 | 2286                    | 0.0883018 | 0.0085603 | 66                    | 11.2132896 | 0.9473604  |
| <i>Hyloxalus</i>    | <i>jacobuspetersi</i>       | 152    | 5            | 1    | 125             | 0.2975920 | 0.0380234 | 106                     | 4.1385283 | 1.6539599 | 5                     | 0.2058380  | 0.0695810  |
| <i>Hyloxalus</i>    | <i>maculosus</i>            | 149    | 4            | 2    | 334             | 0.1490449 | 0.0088111 | 330                     | 0.2694182 | 0.0180100 | 4                     | 3.7026340  | 0.2751140  |
| <i>Hyloxalus</i>    | <i>sp. Negro</i>            | 164    | 7            | 1    | 187             | 0.0862995 | 0.0217220 | 191                     | 0.2528796 | 0.0402086 | 7                     | 3.9263553  | 0.1680832  |
| <i>Hyloxalus</i>    | <i>nexipus</i>              | 154    | 36           | 1    | 863             | 0.0298181 | 0.0027044 | 829                     | 0.0730929 | 0.0043166 | 36                    | 13.7904109 | 0.1885200  |
| <i>Hyloxalus</i>    | <i>aff. nexipus</i>         | 156    | 7            | 1    | 164             | 0.0295244 | 0.0036712 | 162                     | 0.0848395 | 0.0060257 | 7                     | 11.8285189 | 0.2588150  |
| <i>Hyloxalus</i>    | <i>aff. nexipus</i>         | 155    | 23           | 1    | 520             | 0.0213404 | 0.0044498 | 495                     | 0.0732485 | 0.0068560 | 23                    | 13.6014397 | 0.1794989  |
| <i>Hyloxalus</i>    | <i>pulchellus</i>           | 160    | 1            | 2-4  | 22              | 0.7743182 | 0.3182659 | 21                      | 1.8568095 | 0.3568896 | 1                     | 1.4780405  | 0.0000000  |
| <i>Hyloxalus</i>    | <i>pulchellus</i>           | 159    | 8            | 1-2  | 177             | 0.4740113 | 0.2474264 | 173                     | 1.6578324 | 0.5531543 | 8                     | 1.6345070  | 0.3882818  |
| <i>Hyloxalus</i>    | <i>aff. pulchellus</i>      | 161    | 39           | 1    | 201             | 0.0428060 | 0.0052122 | 160                     | 0.1144000 | 0.0188790 | 39                    | 8.7340877  | 0.5095902  |
| <i>Hyloxalus</i>    | <i>cf. pulcherrimus</i>     | 153    | 2            | 1    | 75              | 0.0487600 | 0.0041973 | 70                      | 0.5537000 | 0.0216784 | 2                     | 1.7687064  | 0.0630293  |
| <i>Hyloxalus</i>    | <i>sauli</i>                | 148    | 23           | 1    | 7516            | 0.0159975 | 0.0018493 | 7514                    | 0.0536799 | 0.0372843 | 23                    | 18.7988386 | 0.5472255  |
| <i>Hyloxalus</i>    | <i>sorditatus</i>           | 141    | 9            | 1    | 287             | 0.0656411 | 0.0109478 | 275                     | 0.1086582 | 0.0083189 | 9                     | 9.2881726  | 0.2938481  |
| <i>Hyloxalus</i>    | <i>subpunctatus</i>         | 143    | 2            | 1    | 43              | 0.0239070 | 0.0046538 | 41                      | 0.8524390 | 0.0619419 | 2                     | 1.1747550  | 0.0130870  |
| <i>Hyloxalus</i>    | <i>toachi</i>               | 172    | 29           | 1    | 1194            | 0.0621156 | 0.0090993 | 1167                    | 0.4547121 | 0.1839254 | 29                    | 2.2071720  | 0.1505216  |

Table S1 (Cont.) Temporal, spectral, and scaling variables from calls of poison frogs including phylogeny identifier (Phy ID), locality, call behavior, habit, temperature, size, number of recordings, multinote call features, units of repetition (UR), initial pulse-note, and middle pulse-note parameters.

| Genus                 | Species              | Phy ID | Pulses in UR |      | UR Duration (s) |           |           | Interval between UR (s) |           |           | UR Rate (UR / second) |            |           |
|-----------------------|----------------------|--------|--------------|------|-----------------|-----------|-----------|-------------------------|-----------|-----------|-----------------------|------------|-----------|
|                       |                      |        | N            | Pul. | N               | $\bar{X}$ | SD        | N                       | $\bar{X}$ | SD        | N                     | $\bar{X}$  | SD        |
| <i>Hyloxalus</i>      | <i>vertebralis</i>   | 157    | 1            | 1    | 252             | 0.0651468 | 0.0039234 | 249                     | 0.6202610 | 0.0679829 | 1                     | 1.5248204  | 0.0000000 |
| <i>Hyloxalus</i>      | <i>vertebralis</i>   | 158    | 8            | 1    | 313             | 0.0541182 | 0.0031012 | 294                     | 0.8971803 | 0.2504210 | 8                     | 1.0036064  | 0.1805108 |
| <i>Hyloxalus</i>      | <i>yasuni</i>        | 147    | 78           | 1    | 1266            | 0.0420956 | 0.0042679 | 1235                    | 0.1250559 | 0.1944731 | 78                    | 11.5282835 | 0.1119318 |
| <i>Hyloxalus</i>      | <i>yasuni</i>        | 145    | 49           | 1    | 2167            | 0.0463318 | 0.0063933 | 2136                    | 0.0972935 | 0.0787802 | 49                    | 11.0336773 | 0.5430591 |
| <i>Hyloxalus</i>      | <i>yasuni</i>        | 146    | 22           | 1    | 2060            | 0.0293112 | 0.0033142 | 2037                    | 0.0740707 | 0.0446453 | 22                    | 13.7743329 | 0.5030917 |
| <i>Mannophryne</i>    | <i>urticans</i>      | 25     | 5            | 1    | 400             | 0.0178925 | 0.0031995 | 388                     | 0.0976701 | 0.0042200 | 5                     | 10.1225977 | 0.1786539 |
| <i>Mannophryne</i>    | <i>cordilleriana</i> | 20     | 3            | 1    | 536             | 0.0495504 | 0.0132385 | 566                     | 0.1313021 | 0.0099513 | 3                     | 7.6772987  | 0.1187638 |
| <i>Mannophryne</i>    | <i>herminae</i>      | 19     | 5            | 2    | 427             | 0.1003770 | 0.0069014 | 412                     | 0.3277039 | 0.1252018 | 5                     | 2.7820929  | 1.1180950 |
| <i>Mannophryne</i>    | <i>sp. Guatopo</i>   | 15     | 3            | 2    | 116             | 0.1055517 | 0.0120494 | 111                     | 0.4811171 | 0.1222267 | 3                     | 2.1498444  | 0.4785025 |
| <i>Mannophryne</i>    | <i>leonardo</i>      | 16     | 126          | 1    | 528             | 0.0310341 | 0.0050985 | 485                     | 0.0660041 | 0.0036658 | 126                   | 14.8842989 | 0.3515856 |
| <i>Mannophryne</i>    | <i>olmonae</i>       | 12     | 1            | 1    | 123             | 0.0861870 | 0.0080870 | 122                     | 0.3310902 | 0.0338008 | 1                     | 3.0203253  | 0.0000000 |
| <i>Mannophryne</i>    | <i>orellana</i>      | 22     | 4            | 1    | 217             | 0.0416175 | 0.0071516 | 212                     | 0.0918113 | 0.0048847 | 4                     | 11.0010610 | 0.0906612 |
| <i>Mannophryne</i>    | <i>orellana</i>      | 21     | 14           | 1    | 1858            | 0.0452056 | 0.0109680 | 1835                    | 0.1701706 | 0.1180132 | 14                    | 5.7661132  | 0.5252025 |
| <i>Mannophryne</i>    | <i>riveroi</i>       | 13     | 7            | 1    | 357             | 0.1051008 | 0.0175898 | 377                     | 0.4441247 | 0.1911021 | 7                     | 2.2241685  | 0.2880355 |
| <i>Mannophryne</i>    | <i>trinitatis</i>    | 17     | 4            | 2    | 47              | 0.1165532 | 0.0065998 | 43                      | 0.2900465 | 0.0397570 | 4                     | 3.4731160  | 0.1387110 |
| <i>Mannophryne</i>    | <i>collaris</i>      | 23     | 6            | 1    | 770             | 0.0446805 | 0.0121635 | 799                     | 0.1608335 | 0.0985936 | 6                     | 6.0546896  | 0.3834207 |
| <i>Mannophryne</i>    | <i>collaris</i>      | 24     | 4            | 1    | 614             | 0.0357166 | 0.0070457 | 627                     | 0.1288676 | 0.0685185 | 4                     | 7.0489759  | 0.7440933 |
| <i>Mannophryne</i>    | <i>venezuelensis</i> | 18     | 9            | 1    | 196             | 0.0770255 | 0.0091989 | 187                     | 0.1651765 | 0.0180005 | 9                     | 6.0629256  | 0.1333931 |
| <i>Mannophryne</i>    | <i>vulcano</i>       | 14     | 1            | 2    | 47              | 0.0839787 | 0.0030609 | 46                      | 0.4298913 | 0.0634610 | 1                     | 2.3261694  | 0.0000000 |
| <i>Mannophryne</i>    | <i>yustizi</i>       | 26     | 8            | 1    | 818             | 0.0231430 | 0.0046329 | 799                     | 0.0879737 | 0.0076963 | 8                     | 11.1859592 | 0.4757013 |
| <i>Phyllobates</i>    | <i>aurotaenia</i>    | 108    | 10           | 1    | 622             | 0.0293039 | 0.0061000 | 612                     | 0.0657042 | 0.0033521 | 10                    | 15.2191902 | 0.0458307 |
| <i>Phyllobates</i>    | <i>lugubris</i>      | 111    | 10           | 1    | 643             | 0.0220093 | 0.0021867 | 633                     | 0.0692701 | 0.0074050 | 10                    | 14.4242582 | 0.3278878 |
| <i>Phyllobates</i>    | <i>lugubris</i>      | 112    | 6            | 1    | 539             | 0.0216809 | 0.0042033 | 533                     | 0.0638630 | 0.0027690 | 6                     | 15.6591531 | 0.0592865 |
| <i>Phyllobates</i>    | <i>terribilis</i>    | 109    | 9            | 1    | 351             | 0.0465442 | 0.0063658 | 342                     | 0.1010731 | 0.0042596 | 9                     | 9.8999753  | 0.0945383 |
| <i>Phyllobates</i>    | <i>vittatus</i>      | 110    | 51           | 1    | 3818            | 0.0277004 | 0.0042696 | 3764                    | 0.0714014 | 0.0026579 | 51                    | 13.9846988 | 0.3618635 |
| <i>Rheobates</i>      | <i>palmatus</i>      | 28     | 12           | 1    | 2193            | 0.0460470 | 0.0064508 | 2170                    | 0.1378129 | 0.1411614 | 12                    | 7.2260913  | 0.8319726 |
| <i>Rheobates</i>      | <i>palmatus</i>      | 27     | 7            | 1    | 2393            | 0.0447430 | 0.0095932 | 2386                    | 0.1078189 | 0.0770012 | 7                     | 9.3531488  | 0.4311224 |
| <i>Silverstoneia</i>  | <i>flotator</i>      | 62     | 5            | 1    | 615             | 0.0402813 | 0.0073219 | 608                     | 0.3083947 | 0.0961054 | 5                     | 3.3623619  | 0.4041495 |
| <i>Silverstoneia</i>  | <i>flotator</i>      | 63     | 8            | 1    | 471             | 0.0291295 | 0.0074838 | 462                     | 0.2301494 | 0.0916236 | 8                     | 4.3211830  | 0.1895519 |
| <i>Silverstoneia</i>  | <i>nubicola</i>      | 66     | 43           | 1    | 799             | 0.0282466 | 0.0053708 | 756                     | 0.1086534 | 0.0149615 | 43                    | 9.3497839  | 0.4217109 |
| <i>Silverstoneia</i>  | <i>nubicola</i>      | 65     | 2            | 1    | 262             | 0.0879504 | 0.0038737 | 260                     | 0.4404192 | 0.0290218 | 2                     | 2.3356569  | 0.0672923 |
| <i>Silverstoneia</i>  | <i>nubicola</i>      | 64     | 9            | 1    | 769             | 0.0207217 | 0.0046391 | 760                     | 0.0871579 | 0.0110002 | 9                     | 11.4138255 | 0.5252124 |
| <i>Anomaloglossus</i> | <i>stepheni</i>      | NA     | 23           | 1    | 174             | 0.0225115 | 0.0024036 | 150                     | 0.0543133 | 0.0015891 | 23                    | 18.4037754 | 0.2017090 |
| <i>Allobates</i>      | <i>goianus</i>       | NA     | 1            | 1    | 8               | 0.0362500 | 0.0027646 | 7                       | 0.3940000 | 0.0471487 | 1                     | 2.90065265 | 0.0000000 |
| <i>Hyloxalus</i>      | <i>anthracinus</i>   | NA     | 2            | 1    | 25              | 0.1341200 | 0.0092706 | 22                      | 4.0694545 | 0.8972483 | 3                     | 0.24722957 | 0.0186709 |

Table S1 (Cont.) Temporal, spectral, and scaling variables from calls of poison frogs including phylogeny identifier (Phy ID), locality, call behavior, habit, temperature, size, number of recordings, multinote call features, units of repetition (UR), initial pulse-note, and middle pulse-note parameters.

| Genus            | Species                        | Phy ID | Initial Pulse-Notes |     | Initial Pulse-Note Duration (s) |           |           | Interval between Initial Pulse-Notes (s) |           |           | Initial Pulse-Note Rate (Pulses / second) |            |           |
|------------------|--------------------------------|--------|---------------------|-----|---------------------------------|-----------|-----------|------------------------------------------|-----------|-----------|-------------------------------------------|------------|-----------|
|                  |                                |        | $\bar{X}$           | SD  | <i>N</i>                        | $\bar{X}$ | SD        | <i>N</i>                                 | $\bar{X}$ | SD        | <i>N</i>                                  | $\bar{X}$  | SD        |
| <i>Allobates</i> | <i>algorei</i>                 | 60     | 1.00                | 0.0 | 114                             | 0.0490263 | 0.0041252 | 109                                      | 0.8242110 | 0.3897468 | --                                        | --         | --        |
| <i>Allobates</i> | <i>brunneus</i>                | 37     | 1.00                | 0.0 | 261                             | 0.0459042 | 0.0070989 | 255                                      | 0.4750627 | 0.3317661 | --                                        | --         | --        |
| <i>Allobates</i> | <i>caeruleodactylus</i>        | 48     | 1.00                | 0.0 | 515                             | 0.0280641 | 0.0031865 | 477                                      | 0.4983249 | 0.1212178 | --                                        | --         | --        |
| <i>Allobates</i> | <i>crombiei</i>                | 52     | 1.00                | 0.0 | 48                              | 0.0350833 | 0.0051482 | 48                                       | 0.0716250 | 0.0047831 | --                                        | --         | --        |
| <i>Allobates</i> | <i>femorialis</i>              | 43     | 19.20               | 4.6 | 192                             | 0.0933385 | 0.0287936 | 182                                      | 0.4548626 | 0.2734225 | 10                                        | 2.3035754  | 0.7965966 |
| <i>Allobates</i> | <i>femorialis</i>              | 46     | 1.00                | 0.0 | 24                              | 0.0505417 | 0.0094316 | 24                                       | 0.0799615 | 0.0240408 | --                                        | --         | --        |
| <i>Allobates</i> | <i>femorialis</i>              | 44     | 1.00                | 0.0 | 15                              | 0.0498000 | 0.0030284 | 15                                       | 0.1210000 | 0.0033381 | --                                        | --         | --        |
| <i>Allobates</i> | <i>femorialis</i>              | 40     | 1.00                | 0.0 | 42                              | 0.0352143 | 0.0014405 | 42                                       | 0.0822143 | 0.0015387 | --                                        | --         | --        |
| <i>Allobates</i> | <i>femorialis</i>              | 41     | 1.00                | 0.0 | 249                             | 0.0613414 | 0.0134982 | 249                                      | 0.0822289 | 0.0073424 | --                                        | --         | --        |
| <i>Allobates</i> | <i>femorialis</i>              | 45     | 1.00                | 0.0 | 38                              | 0.0540000 | 0.0098447 | 37                                       | 0.1067941 | 0.0040883 | --                                        | --         | --        |
| <i>Allobates</i> | <i>granti</i>                  | 49     | 1.00                | 0.0 | 69                              | 0.0325507 | 0.0037043 | 68                                       | 0.0518971 | 0.0022337 | --                                        | --         | --        |
| <i>Allobates</i> | <i>humilis</i>                 | 59     | 1.00                | 0.0 | 21                              | 0.0388571 | 0.0025939 | 20                                       | 0.2824000 | 0.0322023 | --                                        | --         | --        |
| <i>Allobates</i> | <i>insperatus</i>              | 54     | 4.07                | 0.6 | 61                              | 0.0218197 | 0.0072790 | 46                                       | 0.0810652 | 0.0160463 | 61                                        | 12.7353370 | 1.4679435 |
| <i>Allobates</i> | <i>aff. insperatus</i>         | 55     | 8.00                | 0.0 | 8                               | 0.0246250 | 0.0056300 | 7                                        | 0.0812857 | 0.0167403 | 8                                         | 12.3022847 | 0.0000000 |
| <i>Allobates</i> | <i>juanii</i>                  | 47     | 1.00                | 0.0 | 211                             | 0.0398341 | 0.0083190 | 206                                      | 0.6004175 | 0.4593572 | --                                        | --         | --        |
| <i>Allobates</i> | <i>kingsburyi</i>              | 39     | 1.00                | 0.0 | 971                             | 0.0357971 | 0.0091989 | 977                                      | 0.0823480 | 0.0194561 | --                                        | --         | --        |
| <i>Allobates</i> | <i>marchesianus</i>            | 50     | 1.00                | 0.0 | 378                             | 0.0523915 | 0.0064038 | 375                                      | 0.3436533 | 0.5010348 | --                                        | --         | --        |
| <i>Allobates</i> | <i>masniger</i>                | 58     | 22.00               | 9.9 | 110                             | 0.0543909 | 0.0088235 | 103                                      | 0.4057670 | 0.1866693 | 5                                         | 2.3566912  | 0.7041055 |
| <i>Allobates</i> | <i>nidicola</i>                | 36     | 1.00                | 0.0 | 645                             | 0.0376248 | 0.0180267 | 631                                      | 0.2401981 | 0.0338020 | --                                        | --         | --        |
| <i>Allobates</i> | <i>olfersioides</i>            | 1      | 1.00                | 0.0 | 260                             | 0.0430308 | 0.0048314 | 258                                      | 0.3684922 | 0.0385468 | --                                        | --         | --        |
| <i>Allobates</i> | <i>ornatus</i>                 | 51     | 1.00                | 0.0 | 195                             | 0.0363333 | 0.0055443 | 178                                      | 0.4669438 | 0.1032403 | --                                        | --         | --        |
| <i>Allobates</i> | <i>sp. Ducke</i>               | 61     | 1.00                | 0.0 | 807                             | 0.0438265 | 0.0075870 | 750                                      | 0.3517173 | 0.2062386 | --                                        | --         | --        |
| <i>Allobates</i> | <i>sp. Neblina</i>             | 29     | 1.00                | 0.0 | 10                              | 0.0288000 | 0.0042111 | 9                                        | 9.7587778 | 4.7187411 | --                                        | --         | --        |
| <i>Allobates</i> | <i>sp. Negro</i>               | 38     | 20.00               | 2.5 | 73                              | 0.0310137 | 0.0033809 | 69                                       | 0.4508116 | 0.5050852 | 3                                         | 3.5621838  | 1.3783725 |
| <i>Allobates</i> | <i>sp. Shushufindi</i>         | 53     | 3.25                | 1.5 | 13                              | 0.0774615 | 0.0059388 | 13                                       | 0.4135385 | 0.0507488 | 4                                         | 2.7235773  | 0.3121869 |
| <i>Allobates</i> | <i>sp. Treviso (sp. small)</i> | 57     | 1.00                | 0.0 | 333                             | 0.0353213 | 0.0043000 | 332                                      | 0.4178404 | 0.1969509 | --                                        | --         | --        |
| <i>Allobates</i> | <i>talamancae</i>              | 34     | 1.00                | 0.0 | 45                              | 0.0400222 | 0.0040536 | 45                                       | 0.0658000 | 0.0034483 | --                                        | --         | --        |
| <i>Allobates</i> | <i>talamancae</i>              | 32     | 1.00                | 0.0 | 15                              | 0.0794000 | 0.0133299 | 15                                       | 0.1260667 | 0.0110419 | --                                        | --         | --        |
| <i>Allobates</i> | <i>talamancae</i>              | 35     | 1.00                | 0.0 | 95                              | 0.0476421 | 0.0064229 | 44                                       | 0.0794318 | 0.0066487 | --                                        | --         | --        |
| <i>Allobates</i> | <i>talamancae</i>              | 31     | 1.00                | 0.0 | 101                             | 0.0560594 | 0.0086612 | 87                                       | 0.0846667 | 0.0049782 | --                                        | --         | --        |
| <i>Allobates</i> | <i>talamancae</i>              | 33     | 1.00                | 0.0 | 36                              | 0.0517222 | 0.0048909 | 36                                       | 0.0766944 | 0.0066882 | --                                        | --         | --        |
| <i>Allobates</i> | <i>talamancae</i>              | 30     | 1.00                | 0.0 | 43                              | 0.0478605 | 0.0045018 | 42                                       | 0.0713095 | 0.0072767 | --                                        | --         | --        |
| <i>Allobates</i> | <i>trilineatus</i>             | 56     | 1.00                | 0.0 | 153                             | 0.0320523 | 0.0029952 | 153                                      | 0.0382288 | 0.0021073 | --                                        | --         | --        |
| <i>Allobates</i> | <i>zaparo</i>                  | 42     | 1.00                | 0.0 | 335                             | 0.0720687 | 0.0108412 | 335                                      | 0.1026866 | 0.0079108 | --                                        | --         | --        |
| <i>Ameerega</i>  | <i>altamazonica</i>            | 103    | 1.00                | 0.0 | 456                             | 0.0617697 | 0.0067513 | 445                                      | 0.5694360 | 0.1049241 | --                                        | --         | --        |

Table S1 (Cont.) Temporal, spectral, and scaling variables from calls of poison frogs including phylogeny identifier (Phy ID), locality, call behavior, habit, temperature, size, number of recordings, multinote call features, units of repetition (UR), initial pulse-note, and middle pulse-note parameters.

| Genus                 | Species                  | Phy ID | Initial Pulse-Notes |     | Initial Pulse-Note Duration (s) |           |           | Interval between Initial Pulse-Notes (s) |           |           | Initial Pulse-Note Rate (Pulses / second) |            |           |
|-----------------------|--------------------------|--------|---------------------|-----|---------------------------------|-----------|-----------|------------------------------------------|-----------|-----------|-------------------------------------------|------------|-----------|
|                       |                          |        | $\bar{X}$           | SD  | <i>N</i>                        | $\bar{X}$ | SD        | <i>N</i>                                 | $\bar{X}$ | SD        | <i>N</i>                                  | $\bar{X}$  | SD        |
| <i>Ameerega</i>       | <i>bassleri</i>          | 89     | 3.00                | 1.1 | 33                              | 0.1718182 | 0.0544842 | 24                                       | 0.4915417 | 0.0601136 | 11                                        | 2.0540869  | 0.1048470 |
| <i>Ameerega</i>       | <i>bilinguis</i>         | 87     | 1.00                | 0.0 | 1890                            | 0.0326238 | 0.0059893 | 1843                                     | 0.0704867 | 0.0041095 | --                                        | --         | --        |
| <i>Ameerega</i>       | <i>braccata</i>          | 94     | 1.00                | 0.0 | 79                              | 0.0319747 | 0.0029307 | 78                                       | 0.1898590 | 0.0130052 | --                                        | --         | --        |
| <i>Ameerega</i>       | <i>cainarachi</i>        | 102    | 1.00                | 0.0 | 30                              | 0.0281333 | 0.0094859 | 33                                       | 0.1176364 | 0.0040142 | --                                        | --         | --        |
| <i>Ameerega</i>       | <i>flavopicta</i>        | 95     | 1.00                | 0.0 | 60                              | 0.0336833 | 0.0007009 | 60                                       | 0.0364667 | 0.0006235 | --                                        | --         | --        |
| <i>Ameerega</i>       | <i>hahneli</i>           | 96     | 1.00                | 0.0 | 42                              | 0.0355238 | 0.0067471 | 38                                       | 0.1538684 | 0.0312273 | --                                        | --         | --        |
| <i>Ameerega</i>       | <i>hahneli</i>           | 97     | 1.00                | 0.0 | 1693                            | 0.0174572 | 0.0030843 | 1650                                     | 0.2392461 | 0.0546046 | --                                        | --         | --        |
| <i>Ameerega</i>       | <i>hahneli</i>           | 98     | 1.00                | 0.0 | 146                             | 0.0164452 | 0.0025812 | 145                                      | 0.1180414 | 0.0125753 | --                                        | --         | --        |
| <i>Ameerega</i>       | <i>hahneli</i>           | 99     | 1.00                | 0.0 | 594                             | 0.0142761 | 0.0012794 | 568                                      | 0.1467852 | 0.0259582 | --                                        | --         | --        |
| <i>Ameerega</i>       | <i>ignipedis</i>         | 90     | 1.00                | 0.0 | 22                              | 0.0946818 | 0.0133395 | 21                                       | 0.6019048 | 0.1003962 | --                                        | --         | --        |
| <i>Ameerega</i>       | <i>parvula</i>           | 86     | 17.20               | 2.7 | 91                              | 0.0118132 | 0.0040958 | 86                                       | 0.0382558 | 0.0020476 | 5                                         | 24.5689763 | 0.8105199 |
| <i>Ameerega</i>       | <i>petersi</i>           | 101    | 1.00                | 0.0 | 24                              | 0.0375417 | 0.0085056 | 24                                       | 0.1080417 | 0.0069061 | --                                        | --         | --        |
| <i>Ameerega</i>       | <i>picta</i>             | 91     | 1.00                | 0.0 | 46                              | 0.0508261 | 0.0043884 | 45                                       | 0.3673778 | 0.0338481 | --                                        | --         | --        |
| <i>Ameerega</i>       | <i>picta</i>             | 92     | 1.00                | 0.0 | 1212                            | 0.0501840 | 0.0083966 | 1186                                     | 0.3142664 | 0.0285930 | --                                        | --         | --        |
| <i>Ameerega</i>       | <i>picta</i>             | 93     | 1.00                | 0.0 | 322                             | 0.0277547 | 0.0027455 | 321                                      | 0.1536231 | 0.0102056 | --                                        | --         | --        |
| <i>Ameerega</i>       | <i>pongoensis</i>        | 88     | 1.00                | 0.0 | 7                               | 0.0772857 | 0.0129578 | 4                                        | 2.3110000 | 0.3918393 | --                                        | --         | --        |
| <i>Ameerega</i>       | <i>silverstonei</i>      | 85     | 13.50               | 2.1 | 27                              | 0.0684815 | 0.0092752 | 25                                       | 0.3002800 | 0.0114438 | 2                                         | 3.3278786  | 0.0291365 |
| <i>Ameerega</i>       | <i>smaragdina</i>        | 100    | 1.00                | 0.0 | 47                              | 0.0540213 | 0.0064488 | 47                                       | 0.1287872 | 0.0062343 | --                                        | --         | --        |
| <i>Ameerega</i>       | <i>trivittata</i>        | 105    | 1.50                | 0.7 | 3                               | 0.0716667 | 0.0072342 | 2                                        | 0.2150000 | 0.0183848 | 3                                         | 4.6682300  | 0.3991831 |
| <i>Ameerega</i>       | <i>trivittata</i>        | 107    | 2.00                | 1.0 | 6                               | 0.0658333 | 0.0081833 | 4                                        | 0.1972500 | 0.0045000 | 6                                         | 5.0672399  | 0.1729852 |
| <i>Ameerega</i>       | <i>trivittata</i>        | 106    | 1.15                | 0.4 | 34                              | 0.0478235 | 0.0099589 | 31                                       | 0.2096452 | 0.0244630 | 34                                        | 4.7722265  | 0.6796718 |
| <i>Ameerega</i>       | <i>trivittata</i>        | 104    | 2.00                | 0.0 | 4                               | 0.0550000 | 0.0092014 | 2                                        | 0.1485000 | 0.0148492 | 4                                         | 6.7678425  | 0.6767497 |
| <i>Anomaloglossus</i> | <i>baeobatrachus</i>     | 3      | 1.00                | 0.0 | 19                              | 0.0279474 | 0.0039648 | 19                                       | 0.0648947 | 0.0019691 | --                                        | --         | --        |
| <i>Anomaloglossus</i> | <i>degranvillei</i>      | 4      | 1.00                | 0.0 | 32                              | 0.1100313 | 0.0066453 | 30                                       | 1.4212333 | 0.1068062 | --                                        | --         | --        |
| <i>Anomaloglossus</i> | <i>rufulus</i>           | 5      | 1.50                | 0.7 | 3                               | 0.0476667 | 0.0105987 | 2                                        | 0.1350000 | 0.0056569 | 1                                         | 7.1942446  | 0.0000000 |
| <i>Anomaloglossus</i> | <i>verbeeksnyderorum</i> | 2      | 4.73                | 1.0 | 71                              | 0.0239296 | 0.0048824 | 56                                       | 0.1301071 | 0.0137069 | 15                                        | 7.7764003  | 0.4429125 |
| <i>Aromobates</i>     | <i>meridensis</i>        | 7      | 3.00                | 0.0 | 3                               | 0.0550000 | 0.0036056 | 2                                        | 0.1040000 | 0.0084853 | 2                                         | 9.6153846  | 0.0000000 |
| <i>Aromobates</i>     | <i>saltuensis</i>        | 11     | 1.00                | 0.0 | 273                             | 0.0369231 | 0.0028267 | 271                                      | 0.0985572 | 0.0029116 | --                                        | --         | --        |
| <i>Aromobates</i>     | <i>cannatellai</i>       | 9      | 1.00                | 0.0 | 149                             | 0.0452617 | 0.0075618 | 147                                      | 0.1868163 | 0.0341463 | --                                        | --         | --        |
| <i>Aromobates</i>     | aff. <i>saltuensis</i>   | 10     | 1.00                | 0.0 | 304                             | 0.1028487 | 0.0243982 | 301                                      | 0.7278405 | 0.1901579 | --                                        | --         | --        |
| <i>Aromobates</i>     | <i>ericksonae</i>        | 8      | 1.00                | 0.0 | 185                             | 0.0452541 | 0.0114591 | 185                                      | 0.0749784 | 0.0086640 | --                                        | --         | --        |
| <i>Aromobates</i>     | <i>ornatissimus</i>      | 6      | 1.00                | 0.0 | 21                              | 0.0890476 | 0.0116382 | 9                                        | 2.8993333 | 0.4837280 | --                                        | --         | --        |
| <i>Colostethus</i>    | <i>argyrogaster</i>      | 83     | 1.00                | 0.0 | 29                              | 0.1172069 | 0.0122951 | 28                                       | 1.1983333 | 0.1682091 | --                                        | --         | --        |
| <i>Colostethus</i>    | <i>fraterdanieli</i>     | 81     | 1.00                | 0.0 | 397                             | 0.0632494 | 0.0109168 | 390                                      | 0.5819487 | 0.0908494 | --                                        | --         | --        |
| <i>Colostethus</i>    | <i>fraterdanieli</i>     | 82     | 1.00                | 0.0 | 869                             | 0.0601738 | 0.0236399 | 864                                      | 0.4029410 | 0.0700993 | --                                        | --         | --        |

Table S1 (Cont.) Temporal, spectral, and scaling variables from calls of poison frogs including phylogeny identifier (Phy ID), locality, call behavior, habit, temperature, size, number of recordings, multinote call features, units of repetition (UR), initial pulse-note, and middle pulse-note parameters.

| Genus               | Species                  | Phy ID | Initial Pulse-Notes |     | Initial Pulse-Note Duration (s) |           |           | Interval between Initial Pulse-Notes (s) |           |           | Initial Pulse-Note Rate (Pulses / second) |             |            |
|---------------------|--------------------------|--------|---------------------|-----|---------------------------------|-----------|-----------|------------------------------------------|-----------|-----------|-------------------------------------------|-------------|------------|
|                     |                          |        | $\bar{X}$           | SD  | <i>N</i>                        | $\bar{X}$ | SD        | <i>N</i>                                 | $\bar{X}$ | SD        | <i>N</i>                                  | $\bar{X}$   | SD         |
| <i>Colostethus</i>  | <i>fugax</i>             | 84     | 1.00                | 0.0 | 131                             | 0.0980458 | 0.0082842 | 121                                      | 2.3206777 | 0.6076704 | --                                        | --          | --         |
| <i>Colostethus</i>  | <i>panamansis</i>        | 76     | 1.00                | 0.0 | 71                              | 0.0602535 | 0.0028721 | 71                                       | 0.1066901 | 0.0031964 | --                                        | --          | --         |
| <i>Colostethus</i>  | <i>panamansis</i>        | 75     | 1.00                | 0.0 | 97                              | 0.0459278 | 0.0035185 | 97                                       | 0.0874021 | 0.0051874 | --                                        | --          | --         |
| <i>Colostethus</i>  | <i>pratti</i>            | 80     | 1.00                | 0.0 | 77                              | 0.0783896 | 0.0090396 | 77                                       | 0.1996883 | 0.0133350 | --                                        | --          | --         |
| <i>Colostethus</i>  | <i>pratti</i>            | 79     | 1.00                | 0.0 | 24                              | 0.0705833 | 0.0062895 | 23                                       | 0.2768261 | 0.0991434 | --                                        | --          | --         |
| <i>Colostethus</i>  | <i>pratti</i>            | 77     | 1.00                | 0.0 | 4                               | 0.0727500 | 0.0053151 | 4                                        | 0.2295000 | 0.0424146 | --                                        | --          | --         |
| <i>Colostethus</i>  | <i>aff. pratti</i>       | 78     | 1.00                | 0.0 | 37                              | 0.0576216 | 0.0076498 | 36                                       | 0.1420556 | 0.0096922 | --                                        | --          | --         |
| <i>Dendrobates</i>  | <i>auratus</i>           | 116    | 14.50               | 0.7 | 29                              | 0.0066552 | 0.0023188 | 26                                       | 0.0162692 | 0.0015889 | 2                                         | 62.8670381  | 8.6245519  |
| <i>Dendrobates</i>  | <i>bombetes</i>          | 126    | 3.25                | 0.5 | 39                              | 0.0020000 | 0.0007947 | 27                                       | 0.0107778 | 0.0046849 | 10                                        | 84.2411699  | 17.6227871 |
| <i>Dendrobates</i>  | <i>captivus</i>          | 125    | 2.88                | 0.7 | 86                              | 0.0132674 | 0.0023082 | 57                                       | 0.0173333 | 0.0023325 | 27                                        | 58.2850888  | 5.5425375  |
| <i>Dendrobates</i>  | <i>castaneoticus</i>     | 114    | 18.50               | 0.7 | 37                              | 0.0065946 | 0.0009267 | 35                                       | 0.0106286 | 0.0010314 | 2                                         | 94.0972222  | 0.4910464  |
| <i>Dendrobates</i>  | <i>claudiae</i>          | 130    | 3.75                | 0.5 | 12                              | 0.0059167 | 0.0026443 | 11                                       | 0.0150000 | 0.0017889 | 4                                         | 67.7423239  | 6.8196479  |
| <i>Dendrobates</i>  | <i>defleri</i>           | 133    | 4.67                | 0.5 | 28                              | 0.0046429 | 0.0011616 | 22                                       | 0.0086364 | 0.0007895 | 6                                         | 116.0776696 | 4.3364498  |
| <i>Dendrobates</i>  | <i>fantasticus</i>       | 137    | 1.43                | 0.5 | 10                              | 0.0158000 | 0.0027809 | 7                                        | 0.0218571 | 0.0030237 | 7                                         | 46.4795097  | 6.1885930  |
| <i>Dendrobates</i>  | <i>galactonotus</i>      | 113    | 35.00               | 0.0 | 35                              | 0.0072286 | 0.0009727 | 34                                       | 0.0155294 | 0.0029257 | 1                                         | 64.3939394  | 0.0000000  |
| <i>Dendrobates</i>  | <i>granuliferus</i>      | 119    | 22.93               | 4.0 | 963                             | 0.0035078 | 0.0006438 | 921                                      | 0.0069924 | 0.0011946 | 42                                        | 142.9825992 | 8.2130263  |
| <i>Dendrobates</i>  | <i>histrionicus</i>      | 121    | 11.94               | 1.7 | 382                             | 0.0028534 | 0.0007169 | 348                                      | 0.0051753 | 0.0010246 | 28                                        | 189.1379306 | 12.8971709 |
| <i>Dendrobates</i>  | <i>imitator</i>          | 131    | 1.77                | 0.7 | 105                             | 0.0088286 | 0.0024747 | 70                                       | 0.0252000 | 0.0027325 | 55                                        | 39.7164784  | 3.4397816  |
| <i>Dendrobates</i>  | <i>lamasi (sirensis)</i> | 132    | 3.75                | 0.5 | 15                              | 0.0078667 | 0.0013558 | 11                                       | 0.0371818 | 0.0018340 | 4                                         | 26.8696430  | 0.9261856  |
| <i>Dendrobates</i>  | <i>leucomelas</i>        | 118    | 7.35                | 1.6 | 125                             | 0.0112960 | 0.0044305 | 108                                      | 0.0640000 | 0.0170332 | 15                                        | 15.7575720  | 1.4248093  |
| <i>Dendrobates</i>  | <i>minutus</i>           | 128    | 4.00                | 0.0 | 4                               | 0.0042500 | 0.0009574 | 3                                        | 0.0096667 | 0.0011547 | 1                                         | 103.4482759 | 0.0000000  |
| <i>Dendrobates</i>  | <i>mysteriosus</i>       | 124    | 5.21                | 1.0 | 98                              | 0.0095918 | 0.0015388 | 78                                       | 0.0191026 | 0.0023108 | 18                                        | 52.2629121  | 3.5044843  |
| <i>Dendrobates</i>  | <i>pumilio</i>           | 123    | 5.07                | 1.1 | 613                             | 0.0017863 | 0.0005844 | 470                                      | 0.0031851 | 0.0006769 | 111                                       | 318.3970636 | 34.3972024 |
| <i>Dendrobates</i>  | <i>pumilio</i>           | 122    | 5.37                | 0.9 | 161                             | 0.0033540 | 0.0008973 | 111                                      | 0.0070631 | 0.0006506 | 161                                       | 142.5795221 | 9.5002421  |
| <i>Dendrobates</i>  | <i>reticulatus</i>       | 136    | 6.67                | 1.0 | 60                              | 0.0015333 | 0.0005357 | 38                                       | 0.0032895 | 0.0011368 | 7                                         | 265.3352351 | 60.4362301 |
| <i>Dendrobates</i>  | <i>sp. Quibdo</i>        | 129    | 6.29                | 0.8 | 44                              | 0.0054773 | 0.0014862 | 37                                       | 0.0082432 | 0.0014416 | 7                                         | 121.7082479 | 8.5713566  |
| <i>Dendrobates</i>  | <i>sylvaticus</i>        | 120    | 10.63               | 1.5 | 319                             | 0.0022476 | 0.0005592 | 288                                      | 0.0039757 | 0.0006044 | 26                                        | 250.3379342 | 10.2489271 |
| <i>Dendrobates</i>  | <i>tinctorius</i>        | 117    | 5.25                | 0.5 | 21                              | 0.0024286 | 0.0005071 | 17                                       | 0.0065882 | 0.0005073 | 21                                        | 151.8389018 | 2.6947231  |
| <i>Dendrobates</i>  | <i>truncatus</i>         | 115    | 5.20                | 0.8 | 24                              | 0.0122500 | 0.0025750 | 17                                       | 0.0192941 | 0.0015315 | 5                                         | 47.7298170  | 7.8911872  |
| <i>Dendrobates</i>  | <i>uakarii</i>           | 138    | 3.80                | 0.4 | 19                              | 0.0131053 | 0.0011970 | 14                                       | 0.0185000 | 0.0015064 | 5                                         | 54.1698944  | 1.1098112  |
| <i>Dendrobates</i>  | <i>variabilis</i>        | 135    | 12.88               | 2.0 | 206                             | 0.0011408 | 0.0003486 | 190                                      | 0.0025421 | 0.0007873 | 16                                        | 396.2648319 | 33.6202258 |
| <i>Dendrobates</i>  | <i>ventrimaculatus</i>   | 134    | 10.83               | 2.6 | 69                              | 0.0022609 | 0.0010095 | 47                                       | 0.0039149 | 0.0015857 | 5                                         | 296.6616390 | 91.5354838 |
| <i>Dendrobates</i>  | <i>ventrimaculatus</i>   | 139    | 6.38                | 2.0 | 82                              | 0.0010610 | 0.0002408 | 69                                       | 0.0025797 | 0.0009457 | 7                                         | 360.9385783 | 46.6130829 |
| <i>Dendrobates</i>  | <i>virolinensis</i>      | 127    | 13.33               | 1.8 | 159                             | 0.0012516 | 0.0004635 | 134                                      | 0.0046493 | 0.0031390 | 5                                         | 262.6214555 | 36.0076213 |
| <i>Epipedobates</i> | <i>anthonyi</i>          | 71     | 6.38                | 0.9 | 51                              | 0.0220588 | 0.0052284 | 43                                       | 0.0563721 | 0.0049762 | 8                                         | 17.7466869  | 0.5552356  |

Table S1 (Cont.) Temporal, spectral, and scaling variables from calls of poison frogs including phylogeny identifier (Phy ID), locality, call behavior, habit, temperature, size, number of recordings, multinote call features, units of repetition (UR), initial pulse-note, and middle pulse-note parameters.

| Genus               | Species                     | Phy ID | Initial Pulse-Notes |     | Initial Pulse-Note Duration (s) |           |           | Interval between Initial Pulse-Notes (s) |           |           | Initial Pulse-Note Rate (Pulses / second) |             |            |
|---------------------|-----------------------------|--------|---------------------|-----|---------------------------------|-----------|-----------|------------------------------------------|-----------|-----------|-------------------------------------------|-------------|------------|
|                     |                             |        | $\bar{X}$           | SD  | <i>N</i>                        | $\bar{X}$ | SD        | <i>N</i>                                 | $\bar{X}$ | SD        | <i>N</i>                                  | $\bar{X}$   | SD         |
| <i>Epipedobates</i> | <i>anthonyi</i>             | 70     | 7.09                | 2.3 | 156                             | 0.0203718 | 0.0058001 | 134                                      | 0.0477537 | 0.0042257 | 22                                        | 21.0652919  | 0.8427564  |
| <i>Epipedobates</i> | <i>boulengeri</i>           | 67     | 1.00                | 0.0 | 41                              | 0.0104634 | 0.0024403 | 41                                       | 0.0207805 | 0.0021156 | --                                        | --          | --         |
| <i>Epipedobates</i> | <i>espinosai</i>            | 69     | 5.60                | 2.4 | 98                              | 0.0074082 | 0.0025680 | 94                                       | 0.0198298 | 0.0017453 | 98                                        | 45.7624812  | 6.3452940  |
| <i>Epipedobates</i> | <i>machalilla</i>           | 73     | 4.00                | 1.0 | 26                              | 0.0112692 | 0.0040749 | 23                                       | 0.0495217 | 0.0059838 | 26                                        | 20.3836696  | 2.4479772  |
| <i>Epipedobates</i> | <i>machalilla</i>           | 72     | 5.24                | 0.9 | 140                             | 0.0085071 | 0.0015385 | 140                                      | 0.0311857 | 0.0013442 | 140                                       | 32.1192574  | 0.5062134  |
| <i>Epipedobates</i> | <i>sp. F darwinwallacei</i> | 68     | 2.52                | 0.5 | 53                              | 0.0080566 | 0.0023892 | 32                                       | 0.0250938 | 0.0038551 | 53                                        | 40.7898412  | 6.2126093  |
| <i>Epipedobates</i> | <i>tricolor</i>             | 74     | 1.00                | 0.0 | 14                              | 0.0097857 | 0.0019682 | 14                                       | 0.0267143 | 0.0019386 | --                                        | --          | --         |
| <i>Hyloxalus</i>    | <i>sp. Agua Azul</i>        | 142    | 5.50                | 2.1 | 11                              | 0.0183636 | 0.0029077 | 9                                        | 0.1348889 | 0.0100180 | 2                                         | 7.9502657   | 1.3996596  |
| <i>Hyloxalus</i>    | <i>awa</i>                  | 171    | 1.00                | 0.0 | 23                              | 0.0610435 | 0.0099976 | 22                                       | 0.1839545 | 0.0228587 | --                                        | --          | --         |
| <i>Hyloxalus</i>    | <i>azureiventris</i>        | 165    | 7.50                | 2.4 | 31                              | 0.0175161 | 0.0040321 | 27                                       | 0.0698148 | 0.0124377 | 3                                         | 14.8320172  | 0.0499905  |
| <i>Hyloxalus</i>    | <i>bocagei</i>              | 151    | 1.00                | 0.0 | 592                             | 0.0295946 | 0.0039963 | 592                                      | 0.0925236 | 0.0036081 | --                                        | --          | --         |
| <i>Hyloxalus</i>    | <i>bocagei</i>              | 150    | 1.00                | 0.0 | 716                             | 0.0323953 | 0.0076933 | 716                                      | 0.1020196 | 0.0070365 | --                                        | --          | --         |
| <i>Hyloxalus</i>    | <i>craspedoceph</i>         | 166    | 7.69                | 0.8 | 100                             | 0.0058300 | 0.0009646 | 87                                       | 0.0071609 | 0.0010661 | 11                                        | 139.7449168 | 3.3165632  |
| <i>Hyloxalus</i>    | <i>aff. delatorreae</i>     | 163    | 1.00                | 0.0 | 16                              | 0.0094375 | 0.0030977 | 16                                       | 0.0106875 | 0.0037898 | --                                        | --          | --         |
| <i>Hyloxalus</i>    | <i>delatorreae</i>          | 162    | 1.00                | 0.0 | 43                              | 0.0109535 | 0.0039638 | 43                                       | 0.0130233 | 0.0043066 | --                                        | --          | --         |
| <i>Hyloxalus</i>    | <i>elachyhistus</i>         | 169    | 1.00                | 0.0 | 315                             | 0.0557238 | 0.0189679 | 309                                      | 1.1413366 | 0.2042063 | --                                        | --          | --         |
| <i>Hyloxalus</i>    | <i>elachyhistus</i>         | 168    | 1.00                | 0.0 | 171                             | 0.1061754 | 0.0063574 | 167                                      | 0.8047186 | 0.1955958 | --                                        | --          | --         |
| <i>Hyloxalus</i>    | <i>erythromos</i>           | 140    | 3.12                | 1.1 | 81                              | 0.0052840 | 0.0016065 | 81                                       | 0.0067091 | 0.0018527 | 81                                        | 157.9898492 | 38.8359031 |
| <i>Hyloxalus</i>    | <i>infraguttatus</i>        | 170    | 1.00                | 0.0 | 30                              | 0.0452333 | 0.0077490 | 26                                       | 0.8946923 | 0.2646307 | --                                        | --          | --         |
| <i>Hyloxalus</i>    | <i>insulatus</i>            | 167    | 1.00                | 0.0 | 374                             | 0.0807594 | 0.0083734 | 361                                      | 0.4099972 | 0.0923916 | --                                        | --          | --         |
| <i>Hyloxalus</i>    | <i>italoi</i>               | 144    | 1.00                | 0.0 | 65                              | 0.0348769 | 0.0074760 | 67                                       | 0.0801642 | 0.0048040 | --                                        | --          | --         |
| <i>Hyloxalus</i>    | <i>jacobuspetersi</i>       | 152    | 1.00                | 0.0 | 125                             | 0.2975920 | 0.0380234 | 106                                      | 4.1385283 | 1.6539599 | --                                        | --          | --         |
| <i>Hyloxalus</i>    | <i>maculosus</i>            | 149    | 1.00                | 0.0 | 334                             | 0.0529820 | 0.0044708 | 334                                      | 0.1031138 | 0.0079442 | --                                        | --          | --         |
| <i>Hyloxalus</i>    | <i>sp. Negro</i>            | 164    | 3.00                | 1.2 | 18                              | 0.0695556 | 0.0336089 | 15                                       | 0.2713333 | 0.1349649 | 18                                        | 4.0078996   | 0.9343306  |
| <i>Hyloxalus</i>    | <i>nexipus</i>              | 154    | 1.94                | 0.2 | 70                              | 0.0231286 | 0.0062922 | 36                                       | 0.0641667 | 0.0048314 | 36                                        | 15.6724853  | 1.2061476  |
| <i>Hyloxalus</i>    | <i>aff. nexipus</i>         | 156    | 1.18                | 0.6 | 11                              | 0.0282308 | 0.0033703 | 13                                       | 0.0880000 | 0.0067823 | 11                                        | 11.3451430  | 0.7643346  |
| <i>Hyloxalus</i>    | <i>aff. nexipus</i>         | 155    | 2.00                | 0.0 | 48                              | 0.0197917 | 0.0068849 | 24                                       | 0.0607500 | 0.0039918 | 48                                        | 16.5287865  | 1.0802749  |
| <i>Hyloxalus</i>    | <i>pulchellus</i>           | 160    | 1.00                | 0.0 | 23                              | 0.0688261 | 0.0047544 | 23                                       | 0.3806087 | 0.0189706 | --                                        | --          | --         |
| <i>Hyloxalus</i>    | <i>pulchellus</i>           | 159    | 1.00                | 0.0 | 182                             | 0.0750495 | 0.0220282 | 74                                       | 0.4276757 | 0.0550206 | --                                        | --          | --         |
| <i>Hyloxalus</i>    | <i>aff. pulchellus</i>      | 161    | 1.00                | 0.0 | 41                              | 0.0390000 | 0.0047958 | 37                                       | 0.0936486 | 0.0083706 | --                                        | --          | --         |
| <i>Hyloxalus</i>    | <i>cf. pulcherrimus</i>     | 153    | 1.00                | 0.0 | 75                              | 0.0487600 | 0.0041973 | 70                                       | 0.5537000 | 0.0216784 | --                                        | --          | --         |
| <i>Hyloxalus</i>    | <i>sauli</i>                | 148    | 1.00                | 0.0 | 24                              | 0.0169167 | 0.0022634 | 24                                       | 0.0498750 | 0.0026262 | --                                        | --          | --         |
| <i>Hyloxalus</i>    | <i>sorditatus</i>           | 141    | 1.00                | 0.0 | 11                              | 0.0620000 | 0.0092087 | 11                                       | 0.0979167 | 0.0065291 | --                                        | --          | --         |
| <i>Hyloxalus</i>    | <i>subpunctatus</i>         | 143    | 1.00                | 0.0 | 43                              | 0.0239070 | 0.0046538 | 41                                       | 0.8524390 | 0.0619419 | --                                        | --          | --         |
| <i>Hyloxalus</i>    | <i>toachi</i>               | 172    | 2.55                | 0.7 | 75                              | 0.0512000 | 0.0092809 | 41                                       | 0.8077805 | 0.2012602 | 27                                        | 1.2768351   | 0.3227074  |



Table S1 (Cont.) Temporal, spectral, and scaling variables from calls of poison frogs including phylogeny identifier (Phy ID), locality, call behavior, habit, temperature, size, number of recordings, multinote call features, units of repetition (UR), initial pulse-note, and middle pulse-note parameters.

| Genus                 | Species              | Phy ID | Initial Pulse-Notes |      | Initial Pulse-Note Duration (s) |           |            | Interval between Initial Pulse-Notes (s) |           |            | Initial Pulse-Note Rate (Pulses / second) |            |           |
|-----------------------|----------------------|--------|---------------------|------|---------------------------------|-----------|------------|------------------------------------------|-----------|------------|-------------------------------------------|------------|-----------|
|                       |                      |        | $\bar{X}$           | SD   | <i>N</i>                        | $\bar{X}$ | SD         | <i>N</i>                                 | $\bar{X}$ | SD         | <i>N</i>                                  | $\bar{X}$  | SD        |
| <i>Hyloxalus</i>      | <i>vertebralis</i>   | 157    | 1.00                | 0.0  | 252                             | 0.0651468 | 0.0039234  | 249                                      | 0.6202610 | 0.0679829  | --                                        | --         | --        |
| <i>Hyloxalus</i>      | <i>vertebralis</i>   | 158    | 1.00                | 0.0  | 313                             | 0.0541182 | 0.0031012  | 294                                      | 0.8971803 | 0.2504210  | --                                        | --         | --        |
| <i>Hyloxalus</i>      | <i>yasuni</i>        | 147    | 2.00                | 0.0  | 156                             | 0.0436218 | 0.0040788  | 78                                       | 0.0860000 | 0.0051092  | 78                                        | 11.6687416 | 0.6980131 |
| <i>Hyloxalus</i>      | <i>yasuni</i>        | 145    | 4.09                | 1.1  | 217                             | 0.0469770 | 0.0065585  | 164                                      | 0.0872500 | 0.0056692  | 52                                        | 11.3958706 | 0.3028768 |
| <i>Hyloxalus</i>      | <i>yasuni</i>        | 146    | 6.04                | 1.6  | 151                             | 0.0282283 | 0.0037779  | 124                                      | 0.0666694 | 0.0044296  | 25                                        | 14.1950300 | 2.6085431 |
| <i>Mannophryne</i>    | <i>urticans</i>      | 25     | 6.17                | 1.5  | 37                              | 0.0142432 | 0.0023022  | 31                                       | 0.1004516 | 0.0060544  | 6                                         | 9.9748243  | 0.3363865 |
| <i>Mannophryne</i>    | <i>cordilleriana</i> | 20     | 10.33               | 2.1  | 16                              | 0.0365625 | 0.0129459  | 18                                       | 0.1232222 | 0.0070089  | 16                                        | 7.6560485  | 0.8246334 |
| <i>Mannophryne</i>    | <i>herminae</i>      | 19     | 1.00                | 0.0  | 427                             | 0.0314169 | 0.0073055  | 427                                      | 0.0690703 | 0.0070588  | --                                        | --         | --        |
| <i>Mannophryne</i>    | <i>sp. Guatopo</i>   | 15     | 1.00                | 0.0  | 116                             | 0.0382414 | 0.0080516  | 116                                      | 0.0666207 | 0.0083183  | --                                        | --         | --        |
| <i>Mannophryne</i>    | <i>leonardo</i>      | 16     | 1.00                | 0.0  | 126                             | 0.0309841 | 0.0054889  | 111                                      | 0.0638649 | 0.0027152  | --                                        | --         | --        |
| <i>Mannophryne</i>    | <i>olmonae</i>       | 12     | 1.00                | 0.0  | 123                             | 0.0861870 | 0.0080870  | 122                                      | 0.3310902 | 0.0338008  | --                                        | --         | --        |
| <i>Mannophryne</i>    | <i>orellana</i>      | 22     | 19.00               | 3.2  | 76                              | 0.0286974 | 0.0062333  | 72                                       | 0.0880556 | 0.0093446  | 4                                         | 11.3505793 | 0.2960400 |
| <i>Mannophryne</i>    | <i>orellana</i>      | 21     | 22.42               | 2.8  | 310                             | 0.0302129 | 0.0065265  | 301                                      | 0.3392890 | 0.2243550  | 14                                        | 2.5336322  | 0.7303017 |
| <i>Mannophryne</i>    | <i>riveroi</i>       | 13     | 14.17               | 1.9  | 100                             | 0.0832000 | 0.0118040  | 105                                      | 0.6438476 | 0.2684916  | 7                                         | 1.4905550  | 0.1705901 |
| <i>Mannophryne</i>    | <i>trinitatis</i>    | 17     | 1.00                | 0.0  | 47                              | 0.0446170 | 0.0035543  | 47                                       | 0.0726596 | 0.0054225  | --                                        | --         | --        |
| <i>Mannophryne</i>    | <i>collaris</i>      | 23     | 23.50               | 1.8  | 127                             | 0.0313307 | 0.0102910  | 125                                      | 0.3019600 | 0.1952005  | 6                                         | 3.2533449  | 0.5380278 |
| <i>Mannophryne</i>    | <i>collaris</i>      | 24     | 21.00               | 1.8  | 93                              | 0.0246667 | 0.0043821  | 85                                       | 0.2327059 | 0.1477314  | 5                                         | 3.8294288  | 1.3134240 |
| <i>Mannophryne</i>    | <i>venezuelensis</i> | 18     | 1.00                | 0.0  | 9                               | 0.0688889 | 0.0113186  | 9                                        | 0.1443333 | 0.0172772  | --                                        | --         | --        |
| <i>Mannophryne</i>    | <i>vulcano</i>       | 14     | 1.00                | 0.0  | 46                              | 0.0228696 | 0.0016681  | 44                                       | 0.0600909 | 0.0020325  | --                                        | --         | --        |
| <i>Mannophryne</i>    | <i>yustizi</i>       | 26     | 11.00               | 3.3  | 88                              | 0.0136705 | 0.0032720  | 77                                       | 0.0938052 | 0.0219755  | 88                                        | 10.6054152 | 0.7679254 |
| <i>Phyllobates</i>    | <i>aurotaenia</i>    | 108    | 3.10                | 0.9  | 31                              | 0.0267097 | 0.0054906  | 21                                       | 0.0656190 | 0.0042600  | 10                                        | 15.3531891 | 0.5150292 |
| <i>Phyllobates</i>    | <i>lugubris</i>      | 111    | 2.40                | 0.5  | 24                              | 0.0220417 | 0.0036769  | 14                                       | 0.0715714 | 0.0059577  | 10                                        | 13.8963963 | 0.9138779 |
| <i>Phyllobates</i>    | <i>lugubris</i>      | 112    | 2.33                | 0.5  | 14                              | 0.0247143 | 0.0049525  | 8                                        | 0.0622500 | 0.0042003  | 6                                         | 16.1203382 | 0.8131796 |
| <i>Phyllobates</i>    | <i>terribilis</i>    | 109    | 2.00                | 0.0  | 18                              | 0.0449444 | 0.0066551  | 9                                        | 0.1033333 | 0.0037417  | 9                                         | 9.6886837  | 0.3501633 |
| <i>Phyllobates</i>    | <i>vittatus</i>      | 110    | 2.24                | 0.4  | 114                             | 0.0231404 | 0.0040699  | 57                                       | 0.0680175 | 0.0041079  | 46                                        | 14.5171740 | 0.7698811 |
| <i>Rheobates</i>      | <i>palmatus</i>      | 28     | 22.50               | 2.6  | 270                             | 0.0496148 | 0.0078716  | 258                                      | 0.3539109 | 0.3370169  | 270                                       | 3.2018734  | 1.5118575 |
| <i>Rheobates</i>      | <i>palmatus</i>      | 27     | 26.00               | 1.6  | 199                             | 0.0576482 | 0.0093591  | 199                                      | 0.2843819 | 0.1903630  | 199                                       | 3.5225187  | 0.4944644 |
| <i>Silverstoneia</i>  | <i>flotator</i>      | 62     | 8.50                | 0.7  | 15                              | 0.0382000 | 0.0110208  | 14                                       | 0.7345000 | 0.2306712  | 2                                         | 1.4172290  | 0.0393967 |
| <i>Silverstoneia</i>  | <i>flotator</i>      | 63     | 11.13               | 4.7  | 89                              | 0.0252697 | 0.0053826  | 81                                       | 0.3806420 | 0.1610824  | 8                                         | 2.6755161  | 0.4495702 |
| <i>Silverstoneia</i>  | <i>nubicola</i>      | 66     | 1.00                | 0.0  | 43                              | 0.0264651 | 0.0067342  | 43                                       | 0.1333488 | 0.0156356  | --                                        | --         | --        |
| <i>Silverstoneia</i>  | <i>nubicola</i>      | 65     | 7.50                | 0.7  | 15                              | 0.0869333 | 0.0053381  | 13                                       | 0.4553077 | 0.0464675  | 2                                         | 2.1942084  | 0.0486224 |
| <i>Silverstoneia</i>  | <i>nubicola</i>      | 64     | 8.00                | 11.4 | 37                              | 0.0133784 | 0.0027320  | 31                                       | 0.0980645 | 0.0100164  | 9                                         | 10.1578529 | 0.2527815 |
| <i>Anomaloglossus</i> | <i>stepheni</i>      | NA     | 1.00                | 0.0  | 25                              | 0.0242000 | 0.00308221 | 25                                       | 0.0567200 | 0.00120831 | --                                        | --         | --        |
| <i>Allobates</i>      | <i>goianus</i>       | NA     | 1.00                | 0.0  | 8                               | 0.0362500 | 0.00276457 | 7                                        | 0.3940000 | 0.04714870 | --                                        | --         | --        |
| <i>Hyloxalus</i>      | <i>anthracinus</i>   | NA     | 1.00                | 0.0  | 25                              | 0.1341200 | 0.00927056 | 22                                       | 4.0694545 | 0.89724827 | --                                        | --         | --        |

Table S1 (Cont.) Temporal, spectral, and scaling variables from calls of poison frogs including phylogeny identifier (Phy ID), locality, call behavior, habit, temperature, size, number of recordings, multinote call features, units of repetition (UR), initial pulse-note, and middle pulse-note parameters.

| Genus            | Species                        | Phy ID | Middle Pulse-Notes |      | Middle Pulse-Note Duration (s) |           |           | Interval between Middle Pulse-Notes (s) |           |           | Middle Pulse-Note Rate (Pulses / second) |            |           |
|------------------|--------------------------------|--------|--------------------|------|--------------------------------|-----------|-----------|-----------------------------------------|-----------|-----------|------------------------------------------|------------|-----------|
|                  |                                |        | $\bar{X}$          | SD   | <i>N</i>                       | $\bar{X}$ | SD        | <i>N</i>                                | $\bar{X}$ | SD        | <i>N</i>                                 | $\bar{X}$  | SD        |
| <i>Allobates</i> | <i>algorei</i>                 | 60     | 1.00               | 0.0  | 114                            | 0.0490263 | 0.0041252 | 109                                     | 0.8242110 | 0.3897468 | 3                                        | 1.2437292  | 0.0977481 |
| <i>Allobates</i> | <i>brunneus</i>                | 37     | 1.00               | 0.0  | 261                            | 0.0459042 | 0.0070989 | 255                                     | 0.4750627 | 0.3317661 | 6                                        | 2.3100940  | 0.1624029 |
| <i>Allobates</i> | <i>caeruleodactylus</i>        | 48     | 1.00               | 0.0  | 515                            | 0.0280641 | 0.0031865 | 477                                     | 0.4983249 | 0.1212178 | 2                                        | 1.8852052  | 0.1605131 |
| <i>Allobates</i> | <i>crombiei</i>                | 52     | 12.51              | 16.3 | 585                            | 0.0387641 | 0.0044621 | 541                                     | 0.0895730 | 0.0052747 | 49                                       | 11.4178995 | 1.1121281 |
| <i>Allobates</i> | <i>femorialis</i>              | 43     | 59.60              | 16.2 | 596                            | 0.0978473 | 0.0170564 | 586                                     | 0.2367304 | 0.1030329 | 596                                      | 4.2815267  | 0.5527573 |
| <i>Allobates</i> | <i>femorialis</i>              | 46     | 2.00               | 0.0  | 72                             | 0.0689583 | 0.0101645 | 24                                      | 0.1307037 | 0.0124153 | 72                                       | 7.4820036  | 0.4197321 |
| <i>Allobates</i> | <i>femorialis</i>              | 44     | 2.00               | 0.0  | 30                             | 0.0875333 | 0.0034113 | 15                                      | 0.1625333 | 0.0041208 | 30                                       | 6.1563431  | 0.1589125 |
| <i>Allobates</i> | <i>femorialis</i>              | 40     | 2.00               | 0.0  | 84                             | 0.0495833 | 0.0043802 | 42                                      | 0.1332857 | 0.0037953 | 84                                       | 7.5086553  | 0.2150795 |
| <i>Allobates</i> | <i>femorialis</i>              | 41     | 1.00               | 0.0  | 149                            | 0.0897785 | 0.0101395 | 249                                     | 0.0822289 | 0.0073424 | 249                                      | 12.1601938 | 0.8098573 |
| <i>Allobates</i> | <i>femorialis</i>              | 45     | 2.00               | 0.0  | 76                             | 0.0869211 | 0.0135526 | 36                                      | 0.1930278 | 0.0059208 | 76                                       | 5.1845902  | 0.1588147 |
| <i>Allobates</i> | <i>granti</i>                  | 49     | 1.00               | 0.0  | 68                             | 0.0323235 | 0.0031168 | 68                                      | 0.0518971 | 0.0022337 | 68                                       | 19.3061670 | 0.8819303 |
| <i>Allobates</i> | <i>humilis</i>                 | 59     | 1.00               | 0.0  | 21                             | 0.0388571 | 0.0025939 | 20                                      | 0.2824000 | 0.0322203 | 1                                        | 3.5410765  | 0.0000000 |
| <i>Allobates</i> | <i>insperatus</i>              | 54     | 33.00              | 4.0  | 495                            | 0.0357273 | 0.0044848 | 493                                     | 0.0822759 | 0.0092295 | 15                                       | 12.1278046 | 1.0689367 |
| <i>Allobates</i> | <i>aff. insperatus</i>         | 55     | 44.00              | 0.0  | 65                             | 0.0311846 | 0.0028278 | 64                                      | 0.0770781 | 0.0039130 | 2                                        | 12.8654189 | 0.2331814 |
| <i>Allobates</i> | <i>juanii</i>                  | 47     | 1.47               | 0.8  | 219                            | 0.0434384 | 0.0101398 | 218                                     | 0.3366055 | 0.0734581 | 219                                      | 3.0775870  | 0.3659648 |
| <i>Allobates</i> | <i>kingsburyi</i>              | 39     | 1.02               | 0.1  | 983                            | 0.0384584 | 0.0101771 | 996                                     | 0.0841024 | 0.0237638 | 980                                      | 12.4716370 | 1.6559587 |
| <i>Allobates</i> | <i>marchesianus</i>            | 50     | 1.00               | 0.0  | 378                            | 0.0523915 | 0.0064038 | 375                                     | 0.3436533 | 0.5010348 | 3                                        | 2.9675705  | 0.4512645 |
| <i>Allobates</i> | <i>masniger</i>                | 58     | 100.2              | 69.6 | 501                            | 0.0655250 | 0.0060433 | 487                                     | 0.2904805 | 0.1026506 | 5                                        | 3.4783565  | 0.2941427 |
| <i>Allobates</i> | <i>nidicola</i>                | 36     | 1.00               | 0.0  | 645                            | 0.0376248 | 0.0180267 | 631                                     | 0.2401981 | 0.0338020 | 2                                        | 3.8105731  | 0.6020460 |
| <i>Allobates</i> | <i>olfersioides</i>            | 1      | 1.00               | 0.0  | 260                            | 0.0430308 | 0.0048314 | 258                                     | 0.3684922 | 0.0385468 | 260                                      | 2.7103674  | 0.0000000 |
| <i>Allobates</i> | <i>ornatus</i>                 | 51     | 1.00               | 0.0  | 195                            | 0.0363333 | 0.0055443 | 178                                     | 0.4669438 | 0.1032403 | 2                                        | 2.1636347  | 0.0451750 |
| <i>Allobates</i> | <i>sp. Duke</i>                | 61     | 1.00               | 0.0  | 807                            | 0.0438265 | 0.0075870 | 750                                     | 0.3517173 | 0.2062386 | 12                                       | 2.7988149  | 0.4932524 |
| <i>Allobates</i> | <i>sp. Neblina</i>             | 29     | 1.00               | 0.0  | 10                             | 0.0288000 | 0.0042111 | 9                                       | 9.7587778 | 4.7187411 | 1                                        | 0.1024718  | 0.0000000 |
| <i>Allobates</i> | <i>sp. Negro</i>               | 38     | 271.0              | 10.4 | 1002                           | 0.0371756 | 0.0032008 | 981                                     | 0.1069062 | 0.0204467 | 5                                        | 9.3078497  | 0.8859232 |
| <i>Allobates</i> | <i>sp. Shushufindi</i>         | 53     | 8.50               | 3.1  | 34                             | 0.0804118 | 0.0050520 | 34                                      | 0.3619118 | 0.0659781 | 4                                        | 2.8253127  | 0.2778025 |
| <i>Allobates</i> | <i>sp. Treviso (sp. small)</i> | 57     | 1.00               | 0.0  | 333                            | 0.0353213 | 0.0043000 | 332                                     | 0.4178404 | 0.1969509 | 2                                        | 2.3564651  | 0.1486610 |
| <i>Allobates</i> | <i>talamancae</i>              | 34     | 1.00               | 0.0  | 45                             | 0.0430889 | 0.0046506 | 45                                      | 0.0658000 | 0.0034483 | 45                                       | 15.1404091 | 0.6678369 |
| <i>Allobates</i> | <i>talamancae</i>              | 32     | 1.00               | 0.0  | 15                             | 0.0894667 | 0.0162035 | 15                                      | 0.1260667 | 0.0110419 | 15                                       | 7.9890802  | 0.6957205 |
| <i>Allobates</i> | <i>talamancae</i>              | 35     | 1.00               | 0.0  | 82                             | 0.0410244 | 0.0080813 | 39                                      | 0.0809487 | 0.0053457 | 42                                       | 12.5088159 | 0.6683370 |
| <i>Allobates</i> | <i>talamancae</i>              | 31     | 1.00               | 0.0  | 87                             | 0.0633218 | 0.0082229 | 85                                      | 0.0847176 | 0.0045738 | 98                                       | 10.5889020 | 3.3845539 |
| <i>Allobates</i> | <i>talamancae</i>              | 33     | 1.00               | 0.0  | 34                             | 0.0435000 | 0.0065886 | 34                                      | 0.0767353 | 0.0058117 | 32                                       | 12.9688575 | 0.8473267 |
| <i>Allobates</i> | <i>talamancae</i>              | 30     | 1.00               | 0.0  | 43                             | 0.0478605 | 0.0032556 | 43                                      | 0.0707907 | 0.0079539 | 40                                       | 13.9750189 | 1.3440785 |
| <i>Allobates</i> | <i>trilineatus</i>             | 56     | 1.00               | 0.0  | 153                            | 0.0304183 | 0.0050972 | 153                                     | 0.0382288 | 0.0021073 | 153                                      | 26.2384866 | 1.4683084 |
| <i>Allobates</i> | <i>zaparo</i>                  | 42     | 1.00               | 0.0  | 335                            | 0.0822090 | 0.0096274 | 335                                     | 0.1026866 | 0.0079108 | 335                                      | 9.7994679  | 0.7994698 |
| <i>Ameerega</i>  | <i>altamazonica</i>            | 103    | 1.00               | 0.0  | 456                            | 0.0617697 | 0.0067513 | 445                                     | 0.5694360 | 0.1049241 | 2                                        | 1.7218342  | 0.1480156 |

Table S1 (Cont.) Temporal, spectral, and scaling variables from calls of poison frogs including phylogeny identifier (Phy ID), locality, call behavior, habit, temperature, size, number of recordings, multinote call features, units of repetition (UR), initial pulse-note, and middle pulse-note parameters.

| Genus                 | Species                  | Phy ID | Middle Pulse-Notes |      | Middle Pulse-Note Duration (s) |           |           | Interval between Middle Pulse-Notes (s) |           |           | Middle Pulse-Note Rate (Pulses / second) |            |           |
|-----------------------|--------------------------|--------|--------------------|------|--------------------------------|-----------|-----------|-----------------------------------------|-----------|-----------|------------------------------------------|------------|-----------|
|                       |                          |        | $\bar{X}$          | SD   | <i>N</i>                       | $\bar{X}$ | SD        | <i>N</i>                                | $\bar{X}$ | SD        | <i>N</i>                                 | $\bar{X}$  | SD        |
| <i>Ameerega</i>       | <i>bassleri</i>          | 89     | 15.75              | 6.0  | 172                            | 0.1749302 | 0.0474085 | 161                                     | 0.4768696 | 0.0739546 | 8                                        | 2.0404996  | 0.1110998 |
| <i>Ameerega</i>       | <i>bilinguis</i>         | 87     | 1.00               | 0.0  | 1888                           | 0.0290689 | 0.0051152 | 1843                                    | 0.0704867 | 0.0041095 | 1856                                     | 35.5321887 | 6.6917165 |
| <i>Ameerega</i>       | <i>braccata</i>          | 94     | 1.00               | 0.0  | 79                             | 0.0319747 | 0.0029307 | 78                                      | 0.1898590 | 0.0130052 | 1                                        | 5.2670673  | 0.0000000 |
| <i>Ameerega</i>       | <i>cainarachi</i>        | 102    | 7.22               | 8.9  | 427                            | 0.0358548 | 0.0059301 | 424                                     | 0.1269363 | 0.0062719 | 33                                       | 8.2883742  | 0.5412315 |
| <i>Ameerega</i>       | <i>flavopicta</i>        | 95     | 8.07               | 0.3  | 484                            | 0.0137500 | 0.0025678 | 424                                     | 0.0181297 | 0.0015282 | 60                                       | 55.1570563 | 0.8173872 |
| <i>Ameerega</i>       | <i>hahneli</i>           | 96     | 1.00               | 0.0  | 42                             | 0.0355238 | 0.0067471 | 38                                      | 0.1538684 | 0.0312273 | 1                                        | 6.0170238  | 0.0000000 |
| <i>Ameerega</i>       | <i>hahneli</i>           | 97     | 1.00               | 0.0  | 1693                           | 0.0174572 | 0.0030843 | 1650                                    | 0.2392461 | 0.0546046 | 4                                        | 4.0801635  | 0.8212713 |
| <i>Ameerega</i>       | <i>hahneli</i>           | 98     | 1.00               | 0.0  | 146                            | 0.0164452 | 0.0025812 | 145                                     | 0.1180414 | 0.0125753 | 1                                        | 8.4716055  | 0.0000000 |
| <i>Ameerega</i>       | <i>hahneli</i>           | 99     | 1.00               | 0.0  | 594                            | 0.0142761 | 0.0012794 | 568                                     | 0.1467852 | 0.0259582 | 1                                        | 6.6263712  | 0.0000000 |
| <i>Ameerega</i>       | <i>ignipedis</i>         | 90     | 1.00               | 0.0  | 22                             | 0.0946818 | 0.0133395 | 21                                      | 0.6019048 | 0.1003962 | 1                                        | 1.6613924  | 0.0000000 |
| <i>Ameerega</i>       | <i>parvula</i>           | 86     | 151.0              | 23.6 | 666                            | 0.0129700 | 0.0032276 | 660                                     | 0.0399955 | 0.0020102 | 5                                        | 24.8829760 | 0.4501010 |
| <i>Ameerega</i>       | <i>petersi</i>           | 101    | 8.14               | 1.7  | 248                            | 0.0316169 | 0.0055865 | 243                                     | 0.1176214 | 0.0064926 | 23                                       | 8.4346808  | 0.1718482 |
| <i>Ameerega</i>       | <i>picta</i>             | 91     | 1.00               | 0.0  | 46                             | 0.0508261 | 0.0043884 | 45                                      | 0.3673778 | 0.0338481 | 1                                        | 2.7219937  | 0.0000000 |
| <i>Ameerega</i>       | <i>picta</i>             | 92     | 1.00               | 0.0  | 1212                           | 0.0501840 | 0.0083966 | 1186                                    | 0.3142664 | 0.0285930 | 5                                        | 2.9810194  | 0.2118055 |
| <i>Ameerega</i>       | <i>picta</i>             | 93     | 1.00               | 0.0  | 322                            | 0.0277547 | 0.0027455 | 321                                     | 0.1536231 | 0.0102056 | 1                                        | 6.5094397  | 0.0000000 |
| <i>Ameerega</i>       | <i>pongoensis</i>        | 88     | 1.00               | 0.0  | 7                              | 0.0772857 | 0.0129578 | 4                                       | 2.3110000 | 0.3918393 | 4                                        | 0.4417345  | 0.0715171 |
| <i>Ameerega</i>       | <i>silverstonei</i>      | 85     | 86.00              | 7.1  | 172                            | 0.0845291 | 0.0144867 | 172                                     | 0.2938953 | 0.0098081 | 2                                        | 3.4031699  | 0.0182553 |
| <i>Ameerega</i>       | <i>smaragdina</i>        | 100    | 1.00               | 0.0  | 47                             | 0.0552766 | 0.0057283 | 47                                      | 0.1287872 | 0.0062343 | 44                                       | 7.7217947  | 0.3064198 |
| <i>Ameerega</i>       | <i>trivittata</i>        | 105    | 46.00              | 22.6 | 92                             | 0.0697391 | 0.0123536 | 91                                      | 0.2198462 | 0.0141146 | 2                                        | 4.6010895  | 0.2086807 |
| <i>Ameerega</i>       | <i>trivittata</i>        | 107    | 36.67              | 21.1 | 109                            | 0.0618991 | 0.0099582 | 109                                     | 0.2079817 | 0.0095568 | 3                                        | 4.7986686  | 0.1466030 |
| <i>Ameerega</i>       | <i>trivittata</i>        | 106    | 14.67              | 10.4 | 506                            | 0.0622095 | 0.0101677 | 503                                     | 0.2280696 | 0.0174325 | 33                                       | 4.3300783  | 0.2299605 |
| <i>Ameerega</i>       | <i>trivittata</i>        | 104    | 34.50              | 30.4 | 69                             | 0.0499565 | 0.0085344 | 69                                      | 0.1606957 | 0.0093750 | 2                                        | 6.2110358  | 0.0047530 |
| <i>Anomaloglossus</i> | <i>baeobatrachus</i>     | 3      | 13.42              | 2.8  | 255                            | 0.0261608 | 0.0031688 | 236                                     | 0.0659831 | 0.0018656 | 19                                       | 15.1547142 | 0.0804141 |
| <i>Anomaloglossus</i> | <i>degranvillei</i>      | 4      | 1.00               | 0.0  | 32                             | 0.1100313 | 0.0066453 | 30                                      | 1.4212333 | 0.1068062 | 2                                        | 0.6842356  | 0.0427282 |
| <i>Anomaloglossus</i> | <i>rufulus</i>           | 5      | 16.0               | 0.0  | 19                             | 0.0537368 | 0.0057624 | 17                                      | 0.1688824 | 0.0116237 | 2                                        | 6.2015256  | 0.5032499 |
| <i>Anomaloglossus</i> | <i>verbeeksnyderorum</i> | 2      | 165.8              | 97.3 | 2144                           | 0.0279510 | 0.0052169 | 2129                                    | 0.1112776 | 0.0117447 | 15                                       | 9.0437646  | 0.1760894 |
| <i>Aromobates</i>     | <i>meridensis</i>        | 7      | 17.00              | 0.0  | 17                             | 0.0606471 | 0.0049616 | 16                                      | 0.1271250 | 0.0078983 | 1                                        | 7.8662734  | 0.0000000 |
| <i>Aromobates</i>     | <i>saluensis</i>         | 11     | 1.00               | 0.0  | 273                            | 0.0401868 | 0.0040181 | 271                                     | 0.0985572 | 0.0029116 | 273                                      | 10.1382008 | 0.3042108 |
| <i>Aromobates</i>     | <i>cannatellai</i>       | 9      | 1.00               | 0.0  | 149                            | 0.0452617 | 0.0075618 | 147                                     | 0.1868163 | 0.0341463 | 149                                      | 5.4372756  | 0.1395947 |
| <i>Aromobates</i>     | aff. <i>saluensis</i>    | 10     | 1.00               | 0.0  | 304                            | 0.1028487 | 0.0243982 | 301                                     | 0.7278405 | 0.1901579 | 304                                      | 1.3942101  | 0.0396928 |
| <i>Aromobates</i>     | <i>ericksonae</i>        | 8      | 1.00               | 0.0  | 185                            | 0.0519730 | 0.0152306 | 185                                     | 0.0749784 | 0.0086640 | 185                                      | 13.4258887 | 1.4125014 |
| <i>Aromobates</i>     | <i>ornatissimus</i>      | 6      | 1.00               | 0.0  | 21                             | 0.0890476 | 0.0116382 | 9                                       | 2.8993333 | 0.4837280 | 3                                        | 0.3184606  | 0.0332919 |
| <i>Colostethus</i>    | <i>argyrogaster</i>      | 83     | 1.00               | 0.0  | 29                             | 0.1172069 | 0.0122951 | 28                                      | 1.1983333 | 0.1682091 | 1                                        | 0.8119708  | 0.0000000 |
| <i>Colostethus</i>    | <i>fraterdanieli</i>     | 81     | 1.00               | 0.0  | 397                            | 0.0632494 | 0.0109168 | 390                                     | 0.5819487 | 0.0908494 | 6                                        | 1.7155691  | 0.0626185 |
| <i>Colostethus</i>    | <i>fraterdanieli</i>     | 82     | 1.00               | 0.0  | 869                            | 0.0601738 | 0.0236399 | 864                                     | 0.4029410 | 0.0700993 | 11                                       | 2.2626010  | 0.3954921 |

Table S1 (Cont.) Temporal, spectral, and scaling variables from calls of poison frogs including phylogeny identifier (Phy ID), locality, call behavior, habit, temperature, size, number of recordings, multinote call features, units of repetition (UR), initial pulse-note, and middle pulse-note parameters.

| Genus               | Species                  | Phy ID | Middle Pulse-Notes |      | Middle Pulse-Note Duration (s) |           |           | Interval between Middle Pulse-Notes (s) |           |           | Middle Pulse-Note Rate (Pulses / second) |             |            |
|---------------------|--------------------------|--------|--------------------|------|--------------------------------|-----------|-----------|-----------------------------------------|-----------|-----------|------------------------------------------|-------------|------------|
|                     |                          |        | $\bar{X}$          | SD   | <i>N</i>                       | $\bar{X}$ | SD        | <i>N</i>                                | $\bar{X}$ | SD        | <i>N</i>                                 | $\bar{X}$   | SD         |
| <i>Colostethus</i>  | <i>fugax</i>             | 84     | 1.00               | 0.0  | 131                            | 0.0980458 | 0.0082842 | 121                                     | 2.3206777 | 0.6076704 | 5                                        | 0.4084228   | 0.0770299  |
| <i>Colostethus</i>  | <i>panamansis</i>        | 76     | 1.68               | 0.6  | 119                            | 0.0460672 | 0.0047241 | 115                                     | 0.1055391 | 0.0033094 | 71                                       | 9.5518494   | 0.3547548  |
| <i>Colostethus</i>  | <i>panamansis</i>        | 75     | 1.48               | 0.5  | 144                            | 0.0361458 | 0.0035141 | 144                                     | 0.0846111 | 0.0062007 | 93                                       | 12.0377620  | 0.7742831  |
| <i>Colostethus</i>  | <i>pratti</i>            | 80     | 4.03               | 3.5  | 310                            | 0.0709548 | 0.0093503 | 310                                     | 0.2003000 | 0.0140718 | 77                                       | 4.8678401   | 0.2949267  |
| <i>Colostethus</i>  | <i>pratti</i>            | 79     | 10.78              | 4.6  | 282                            | 0.0596135 | 0.0078043 | 282                                     | 0.2137731 | 0.0648981 | 23                                       | 4.2335715   | 0.4330080  |
| <i>Colostethus</i>  | <i>pratti</i>            | 77     | 4.75               | 1.3  | 18                             | 0.0656111 | 0.0070138 | 17                                      | 0.1864118 | 0.0100129 | 4                                        | 5.4466461   | 0.0534772  |
| <i>Colostethus</i>  | aff. <i>pratti</i>       | 78     | 4.81               | 2.7  | 178                            | 0.0413090 | 0.0060786 | 178                                     | 0.1214888 | 0.0138332 | 34                                       | 8.4350387   | 0.4414294  |
| <i>Dendrobates</i>  | <i>auratus</i>           | 116    | 201.0              | 69.3 | 402                            | 0.0065920 | 0.0016646 | 402                                     | 0.0159328 | 0.0010771 | 2                                        | 62.1769900  | 4.1550624  |
| <i>Dendrobates</i>  | <i>bombetes</i>          | 126    | 225.9              | 12.8 | 2534                           | 0.0023331 | 0.0010935 | 2481                                    | 0.0062479 | 0.0021495 | 10                                       | 163.1214068 | 14.2414570 |
| <i>Dendrobates</i>  | <i>captivus</i>          | 125    | 9.56               | 1.2  | 306                            | 0.0148333 | 0.0021336 | 300                                     | 0.0205467 | 0.0018382 | 30                                       | 48.1764976  | 1.2128313  |
| <i>Dendrobates</i>  | <i>castaneoticus</i>     | 114    | 325.5              | 0.7  | 651                            | 0.0055238 | 0.0010171 | 641                                     | 0.0117223 | 0.0008483 | 2                                        | 84.6485158  | 0.0185249  |
| <i>Dendrobates</i>  | <i>claudiae</i>          | 130    | 67.00              | 5.8  | 268                            | 0.0064963 | 0.0013533 | 268                                     | 0.0161530 | 0.0016857 | 4                                        | 61.8709588  | 5.6159408  |
| <i>Dendrobates</i>  | <i>defleri</i>           | 133    | 37.00              | 10.1 | 222                            | 0.0053333 | 0.0009545 | 216                                     | 0.0110046 | 0.0045315 | 6                                        | 90.0854768  | 8.1131757  |
| <i>Dendrobates</i>  | <i>fantasticus</i>       | 137    | 12.57              | 1.9  | 88                             | 0.0172045 | 0.0025105 | 82                                      | 0.0225610 | 0.0020312 | 7                                        | 44.6199881  | 1.1456677  |
| <i>Dendrobates</i>  | <i>galactonotus</i>      | 113    | 600.0              | 0.0  | 600                            | 0.0071367 | 0.0015249 | 599                                     | 0.0162905 | 0.0046448 | 1                                        | 61.1805698  | 0.0000000  |
| <i>Dendrobates</i>  | <i>granuliferus</i>      | 119    | 34.21              | 5.0  | 1437                           | 0.0037126 | 0.0007540 | 1395                                    | 0.0068337 | 0.0011487 | 42                                       | 146.7616577 | 9.9746382  |
| <i>Dendrobates</i>  | <i>histrionicus</i>      | 121    | 15.90              | 1.6  | 503                            | 0.0024871 | 0.0007080 | 506                                     | 0.0032470 | 0.0007862 | 30                                       | 318.4734264 | 17.3725102 |
| <i>Dendrobates</i>  | <i>imitator</i>          | 131    | 21.13              | 4.5  | 1366                           | 0.0106955 | 0.0032912 | 1363                                    | 0.0289589 | 0.0030136 | 64                                       | 34.1333311  | 2.6086470  |
| <i>Dendrobates</i>  | <i>lamasi (sirensis)</i> | 132    | 28.25              | 3.6  | 107                            | 0.0096075 | 0.0014650 | 113                                     | 0.0411593 | 0.0045602 | 4                                        | 24.3038674  | 0.3800638  |
| <i>Dendrobates</i>  | <i>leucomelas</i>        | 118    | 151.4              | 42.2 | 2575                           | 0.0148722 | 0.0043468 | 2551                                    | 0.0601094 | 0.0037401 | 15                                       | 16.6857753  | 0.7465779  |
| <i>Dendrobates</i>  | <i>minutus</i>           | 128    | 89.00              | 0.0  | 89                             | 0.0037191 | 0.0010870 | 88                                      | 0.0120909 | 0.0010465 | 1                                        | 82.7067669  | 0.0000000  |
| <i>Dendrobates</i>  | <i>mysteriosus</i>       | 124    | 67.56              | 8.1  | 1318                           | 0.0103703 | 0.0020955 | 1318                                    | 0.0197200 | 0.0022912 | 19                                       | 50.6111642  | 3.4543031  |
| <i>Dendrobates</i>  | <i>pumilio</i>           | 123    | 9.87               | 1.7  | 1123                           | 0.0018655 | 0.0004857 | 1095                                    | 0.0025900 | 0.0004921 | 98                                       | 391.0695293 | 11.3213224 |
| <i>Dendrobates</i>  | <i>pumilio</i>           | 122    | 11.50              | 1.3  | 324                            | 0.0027932 | 0.0005651 | 293                                     | 0.0036621 | 0.0005538 | 324                                      | 272.0773565 | 13.2939197 |
| <i>Dendrobates</i>  | <i>reticulatus</i>       | 136    | 47.67              | 8.5  | 429                            | 0.0015082 | 0.0005052 | 415                                     | 0.0036096 | 0.0015281 | 7                                        | 276.0033587 | 9.8177604  |
| <i>Dendrobates</i>  | <i>sp. Quibdo</i>        | 129    | 146.1              | 12.2 | 995                            | 0.0032000 | 0.0011020 | 977                                     | 0.0088669 | 0.0005108 | 7                                        | 110.1398795 | 3.9324892  |
| <i>Dendrobates</i>  | <i>sylvaticus</i>        | 120    | 12.83              | 1.5  | 385                            | 0.0021532 | 0.0008416 | 375                                     | 0.0028240 | 0.0006299 | 26                                       | 361.2245337 | 21.4423998 |
| <i>Dendrobates</i>  | <i>tinctorius</i>        | 117    | 116.3              | 2.6  | 465                            | 0.0022065 | 0.0004961 | 461                                     | 0.0072126 | 0.0006241 | 4                                        | 138.6406915 | 0.4083275  |
| <i>Dendrobates</i>  | <i>truncatus</i>         | 115    | 150.2              | 6.4  | 751                            | 0.0101944 | 0.0023675 | 746                                     | 0.0196850 | 0.0016158 | 5                                        | 50.8693331  | 3.3040496  |
| <i>Dendrobates</i>  | <i>uakarii</i>           | 138    | 9.20               | 1.1  | 46                             | 0.0117826 | 0.0015904 | 41                                      | 0.0171463 | 0.0024755 | 5                                        | 58.2069162  | 2.6920419  |
| <i>Dendrobates</i>  | <i>variabilis</i>        | 135    | 75.50              | 11.9 | 1217                           | 0.0014108 | 0.0004955 | 1167                                    | 0.0042348 | 0.0026229 | 13                                       | 232.4430875 | 19.8852139 |
| <i>Dendrobates</i>  | <i>ventrimaculatus</i>   | 134    | 102.2              | 15.8 | 520                            | 0.0018538 | 0.0007863 | 505                                     | 0.0033248 | 0.0016383 | 3                                        | 300.0209105 | 23.1526362 |
| <i>Dendrobates</i>  | <i>ventrimaculatus</i>   | 139    | 71.85              | 8.4  | 935                            | 0.0012257 | 0.0004182 | 922                                     | 0.0060531 | 0.0041351 | 13                                       | 171.9439999 | 42.7549137 |
| <i>Dendrobates</i>  | <i>virolinensis</i>      | 127    | 183.6              | 30.7 | 2216                           | 0.0020108 | 0.0008974 | 2210                                    | 0.0095647 | 0.0044717 | 9                                        | 102.8063057 | 8.8674566  |
| <i>Epipedobates</i> | <i>anthonyi</i>          | 71     | 54.38              | 5.3  | 435                            | 0.0294184 | 0.0034747 | 435                                     | 0.0615747 | 0.0045514 | 8                                        | 16.2405042  | 0.4643159  |

Table S1 (Cont.) Temporal, spectral, and scaling variables from calls of poison frogs including phylogeny identifier (Phy ID), locality, call behavior, habit, temperature, size, number of recordings, multinote call features, units of repetition (UR), initial pulse-note, and middle pulse-note parameters.

| Genus               | Species                     | Phy ID | Middle Pulse-Notes |       | Middle Pulse-Note Duration (s) |           |           | Interval between Middle Pulse-Notes (s) |           |           | Middle Pulse-Note Rate (Pulses / second) |            |            |
|---------------------|-----------------------------|--------|--------------------|-------|--------------------------------|-----------|-----------|-----------------------------------------|-----------|-----------|------------------------------------------|------------|------------|
|                     |                             |        | $\bar{X}$          | SD    | <i>N</i>                       | $\bar{X}$ | SD        | <i>N</i>                                | $\bar{X}$ | SD        | <i>N</i>                                 | $\bar{X}$  | SD         |
| <i>Epipedobates</i> | <i>anthonyi</i>             | 70     | 48.43              | 10.5  | 1077                           | 0.0258914 | 0.0045370 | 1077                                    | 0.0538505 | 0.0074146 | 22                                       | 18.7851548 | 0.8858066  |
| <i>Epipedobates</i> | <i>boulengeri</i>           | 67     | 6.44               | 1.6   | 265                            | 0.0137925 | 0.0021192 | 265                                     | 0.0236340 | 0.0023912 | 41                                       | 41.3622764 | 1.1933718  |
| <i>Epipedobates</i> | <i>espinosai</i>            | 69     | 57.00              | 27.9  | 738                            | 0.0086531 | 0.0033577 | 723                                     | 0.0220844 | 0.0019833 | 15                                       | 43.4269965 | 3.0046763  |
| <i>Epipedobates</i> | <i>machalilla</i>           | 73     | 115.2              | 8.8   | 331                            | 0.0173716 | 0.0038883 | 332                                     | 0.0515211 | 0.0026468 | 26                                       | 19.5496485 | 0.4136095  |
| <i>Epipedobates</i> | <i>machalilla</i>           | 72     | 119.6              | 9.4   | 3947                           | 0.0122716 | 0.0020075 | 3947                                    | 0.0335516 | 0.0017327 | 140                                      | 29.6897873 | 0.4665868  |
| <i>Epipedobates</i> | <i>sp. F darwinwallacei</i> | 68     | 64.11              | 7.4   | 1295                           | 0.0097459 | 0.0020472 | 1329                                    | 0.0288014 | 0.0035955 | 21                                       | 34.9397207 | 3.9907238  |
| <i>Epipedobates</i> | <i>tricolor</i>             | 74     | 58.55              | 2.5   | 812                            | 0.0162882 | 0.0022628 | 804                                     | 0.0345572 | 0.0025404 | 14                                       | 28.7222492 | 0.4451967  |
| <i>Hyloxalus</i>    | <i>sp. Agua Azul</i>        | 142    | 74.50              | 2.1   | 149                            | 0.0230336 | 0.0044652 | 147                                     | 0.1261565 | 0.0181967 | 2                                        | 7.9362611  | 0.2923080  |
| <i>Hyloxalus</i>    | <i>awa</i>                  | 171    | 19.04              | 6.7   | 478                            | 0.0635696 | 0.0107643 | 476                                     | 0.1560966 | 0.0138754 | 25                                       | 6.4203545  | 0.1986079  |
| <i>Hyloxalus</i>    | <i>azureiventris</i>        | 165    | 220.3              | 66.3  | 726                            | 0.0159683 | 0.0051547 | 722                                     | 0.0653158 | 0.0022020 | 5                                        | 15.3222169 | 0.1544523  |
| <i>Hyloxalus</i>    | <i>bocagei</i>              | 151    | 1.00               | 0.0   | 592                            | 0.0287973 | 0.0033949 | 592                                     | 0.0925236 | 0.0036081 | 592                                      | 10.8232757 | 0.3920091  |
| <i>Hyloxalus</i>    | <i>bocagei</i>              | 150    | 1.00               | 0.0   | 716                            | 0.0299008 | 0.0078102 | 716                                     | 0.1020196 | 0.0070365 | 716                                      | 9.8508978  | 0.7151813  |
| <i>Hyloxalus</i>    | <i>craspedoceph</i>         | 166    | 17.27              | 1.3   | 225                            | 0.0054622 | 0.0009495 | 225                                     | 0.0069867 | 0.0006647 | 12                                       | 143.732994 | 0.9179012  |
| <i>Hyloxalus</i>    | <i>aff. delatorreae</i>     | 163    | 6.31               | 0.6   | 101                            | 0.0067228 | 0.0013647 | 85                                      | 0.0096353 | 0.0011736 | 16                                       | 103.605265 | 5.4213506  |
| <i>Hyloxalus</i>    | <i>delatorreae</i>          | 162    | 5.72               | 0.8   | 234                            | 0.0067991 | 0.0008480 | 195                                     | 0.0099897 | 0.0010204 | 43                                       | 100.653729 | 4.8957153  |
| <i>Hyloxalus</i>    | <i>elachyhistus</i>         | 169    | 1.00               | 0.0   | 315                            | 0.0557238 | 0.0189679 | 309                                     | 1.1413366 | 0.2042063 | 3                                        | 0.8193312  | 0.0802109  |
| <i>Hyloxalus</i>    | <i>elachyhistus</i>         | 168    | 1.00               | 0.0   | 171                            | 0.1061754 | 0.0063574 | 167                                     | 0.8047186 | 0.1955958 | 3                                        | 1.2376683  | 0.0819356  |
| <i>Hyloxalus</i>    | <i>erythromos</i>           | 140    | 15.59              | 2.8   | 436                            | 0.0045459 | 0.0015611 | 433                                     | 0.0058014 | 0.0018238 | 29                                       | 171.904451 | 20.9058632 |
| <i>Hyloxalus</i>    | <i>infraguttatus</i>        | 170    | 61.83              | 29.0  | 1607                           | 0.0612900 | 0.0057504 | 1596                                    | 0.4565796 | 0.1085099 | 25                                       | 2.1166623  | 0.2004152  |
| <i>Hyloxalus</i>    | <i>insulatus</i>            | 167    | 1.00               | 0.0   | 374                            | 0.0807594 | 0.0083734 | 361                                     | 0.4099972 | 0.0923916 | 5                                        | 2.2566664  | 0.2257827  |
| <i>Hyloxalus</i>    | <i>italoi</i>               | 144    | 33.22              | 8.7   | 2284                           | 0.0403682 | 0.0063848 | 2284                                    | 0.0882846 | 0.0084253 | 65                                       | 11.1384158 | 0.9497937  |
| <i>Hyloxalus</i>    | <i>jacobuspetersi</i>       | 152    | 1.00               | 0.0   | 125                            | 0.2975920 | 0.0380234 | 106                                     | 4.1385283 | 1.6539599 | 5                                        | 0.2058380  | 0.0695810  |
| <i>Hyloxalus</i>    | <i>maculosus</i>            | 149    | 1.00               | 0.0   | 334                            | 0.0459311 | 0.0045180 | 334                                     | 0.1031138 | 0.0079442 | 334                                      | 9.7520966  | 0.7073425  |
| <i>Hyloxalus</i>    | <i>sp. Negro</i>            | 164    | 25.43              | 4.7   | 171                            | 0.0868012 | 0.0207989 | 178                                     | 0.2535393 | 0.0366674 | 7                                        | 3.9300839  | 0.0930332  |
| <i>Hyloxalus</i>    | <i>nexipus</i>              | 154    | 23.92              | 2.7   | 863                            | 0.0298181 | 0.0027044 | 829                                     | 0.0730929 | 0.0043166 | 36                                       | 13.6825629 | 0.1922879  |
| <i>Hyloxalus</i>    | <i>aff. nexipus</i>         | 156    | 18.00              | 3.3   | 151                            | 0.0296358 | 0.0036851 | 150                                     | 0.0845867 | 0.0059135 | 11                                       | 12.1045401 | 0.4790245  |
| <i>Hyloxalus</i>    | <i>aff. nexipus</i>         | 155    | 20.32              | 1.7   | 472                            | 0.0214979 | 0.0041012 | 471                                     | 0.0738854 | 0.0063437 | 24                                       | 13.4027838 | 0.1942017  |
| <i>Hyloxalus</i>    | <i>pulchellus</i>           | 160    | 1.78               | 0.7   | 40                             | 0.0677000 | 0.0034359 | 38                                      | 0.3978158 | 0.0380589 | 21                                       | 2.4600067  | 0.1718126  |
| <i>Hyloxalus</i>    | <i>pulchellus</i>           | 159    | 1.20               | 0.5   | 218                            | 0.0708257 | 0.0205916 | 111                                     | 0.4398468 | 0.0417978 | 93                                       | 2.0957037  | 0.1922535  |
| <i>Hyloxalus</i>    | <i>aff. pulchellus</i>      | 161    | 3.84               | 1.0   | 155                            | 0.0438000 | 0.0043206 | 153                                     | 0.1146013 | 0.0158680 | 36                                       | 8.1761042  | 0.4166837  |
| <i>Hyloxalus</i>    | <i>cf. pulcherrimus</i>     | 153    | 1.00               | 0.0   | 75                             | 0.0487600 | 0.0041973 | 70                                      | 0.5537000 | 0.0216784 | 2                                        | 1.7687064  | 0.0630293  |
| <i>Hyloxalus</i>    | <i>sauli</i>                | 148    | 109.9              | 114.7 | 7492                           | 0.0159945 | 0.0018473 | 7492                                    | 0.0529079 | 0.0032798 | 23                                       | 18.7358046 | 0.5893783  |
| <i>Hyloxalus</i>    | <i>sorditatus</i>           | 141    | 26.30              | 4.0   | 272                            | 0.0659118 | 0.0107885 | 272                                     | 0.1085000 | 0.0077460 | 10                                       | 9.1823815  | 0.0936914  |
| <i>Hyloxalus</i>    | <i>subpunctatus</i>         | 143    | 1.00               | 0.0   | 43                             | 0.0239070 | 0.0046538 | 41                                      | 0.8524390 | 0.0619419 | 2                                        | 1.1747550  | 0.0130870  |
| <i>Hyloxalus</i>    | <i>toachi</i>               | 172    | 36.38              | 10.7  | 1115                           | 0.0628897 | 0.0084679 | 1102                                    | 0.4258103 | 0.0914841 | 27                                       | 2.3274389  | 0.1296500  |

Table S1 (Cont.) Temporal, spectral, and scaling variables from calls of poison frogs including phylogeny identifier (Phy ID), locality, call behavior, habit, temperature, size, number of recordings, multinote call features, units of repetition (UR), initial pulse-note, and middle pulse-note parameters.

| Genus                 | Species              | Phy ID | Middle Pulse-Notes |       | Middle Pulse-Note Duration (s) |           |           | Interval between Middle Pulse-Notes (s) |           |            | Middle Pulse-Note Rate (Pulses / second) |            |            |
|-----------------------|----------------------|--------|--------------------|-------|--------------------------------|-----------|-----------|-----------------------------------------|-----------|------------|------------------------------------------|------------|------------|
|                       |                      |        | $\bar{X}$          | SD    | <i>N</i>                       | $\bar{X}$ | SD        | <i>N</i>                                | $\bar{X}$ | SD         | <i>N</i>                                 | $\bar{X}$  | SD         |
| <i>Hyloxalus</i>      | <i>vertebralis</i>   | 157    | 1.00               | 0.0   | 252                            | 0.0651468 | 0.0039234 | 249                                     | 0.6202610 | 0.0679829  | 1                                        | 1.5248204  | 0.0000000  |
| <i>Hyloxalus</i>      | <i>vertebralis</i>   | 158    | 1.00               | 0.0   | 313                            | 0.0541182 | 0.0031012 | 294                                     | 0.8971803 | 0.2504210  | 8                                        | 1.0036064  | 0.1805108  |
| <i>Hyloxalus</i>      | <i>yasuni</i>        | 147    | 14.23              | 2.2   | 1110                           | 0.0418811 | 0.0042518 | 1032                                    | 0.0867045 | 0.0050330  | 78                                       | 11.5312167 | 0.1138592  |
| <i>Hyloxalus</i>      | <i>yasuni</i>        | 145    | 36.71              | 10.8  | 1950                           | 0.0462600 | 0.0063723 | 1944                                    | 0.0897716 | 0.0098777  | 51                                       | 10.9245080 | 0.3593613  |
| <i>Hyloxalus</i>      | <i>yasuni</i>        | 146    | 75.85              | 17.1  | 1909                           | 0.0294678 | 0.0031642 | 1906                                    | 0.0720210 | 0.0039318  | 23                                       | 13.9195504 | 0.4951597  |
| <i>Mannophryne</i>    | <i>urticans</i>      | 25     | 60.00              | 22.0  | 363                            | 0.0182645 | 0.0030423 | 357                                     | 0.0974286 | 0.0039418  | 6                                        | 10.1564487 | 0.1642136  |
| <i>Mannophryne</i>    | <i>cordilleriana</i> | 20     | 168.00             | 63.6  | 522                            | 0.0498218 | 0.0131943 | 548                                     | 0.1315675 | 0.0099268  | 3                                        | 7.6972141  | 0.1988063  |
| <i>Mannophryne</i>    | <i>herminae</i>      | 19     | 1.00               | 0.0   | 427                            | 0.0313068 | 0.0091332 | 427                                     | 0.0690703 | 0.0070588  | 427                                      | 14.5973182 | 1.4043799  |
| <i>Mannophryne</i>    | <i>sp. Guatopo</i>   | 15     | 1.00               | 0.0   | 116                            | 0.0389310 | 0.0074129 | 116                                     | 0.0666207 | 0.0083183  | 116                                      | 15.2493091 | 1.9768736  |
| <i>Mannophryne</i>    | <i>leonardo</i>      | 16     | 3.19               | 0.4   | 402                            | 0.0310498 | 0.0049770 | 374                                     | 0.0666390 | 0.0036738  | 402                                      | 14.5685543 | 0.4128308  |
| <i>Mannophryne</i>    | <i>olmonae</i>       | 12     | 1.00               | 0.0   | 123                            | 0.0861870 | 0.0080870 | 122                                     | 0.3310902 | 0.0338008  | 123                                      | 3.0203253  | 0.0000000  |
| <i>Mannophryne</i>    | <i>orellana</i>      | 22     | 48.50              | 12.7  | 194                            | 0.0428247 | 0.0062446 | 190                                     | 0.0921526 | 0.0042217  | 4                                        | 10.8614685 | 0.0707255  |
| <i>Mannophryne</i>    | <i>orellana</i>      | 21     | 111.33             | 28.7  | 1548                           | 0.0482080 | 0.0090461 | 1534                                    | 0.1369863 | 0.0096796  | 14                                       | 7.2900035  | 0.1595593  |
| <i>Mannophryne</i>    | <i>riveroi</i>       | 13     | 36.83              | 5.3   | 257                            | 0.1136226 | 0.0107755 | 272                                     | 0.3670257 | 0.0397966  | 8                                        | 2.6802512  | 0.2638645  |
| <i>Mannophryne</i>    | <i>trinitatis</i>    | 17     | 1.00               | 0.0   | 47                             | 0.0438936 | 0.0039521 | 47                                      | 0.0726596 | 0.0054225  | 47                                       | 13.8400620 | 1.0626597  |
| <i>Mannophryne</i>    | <i>collaris</i>      | 23     | 113.33             | 22.9  | 643                            | 0.0473173 | 0.0106871 | 674                                     | 0.1346602 | 0.0109715  | 6                                        | 7.4447205  | 0.1378575  |
| <i>Mannophryne</i>    | <i>collaris</i>      | 24     | 109.40             | 14.8  | 525                            | 0.0375390 | 0.0056667 | 542                                     | 0.1125830 | 0.0091643  | 5                                        | 8.8856842  | 0.3181454  |
| <i>Mannophryne</i>    | <i>venezuelensis</i> | 18     | 1.00               | 0.0   | 196                            | 0.0770255 | 0.0091989 | 187                                     | 0.1651765 | 0.0180005  | 9                                        | 6.0629256  | 0.1333931  |
| <i>Mannophryne</i>    | <i>vulcano</i>       | 14     | 1.00               | 0.0   | 47                             | 0.0238723 | 0.0029607 | 44                                      | 0.0600909 | 0.0020325  | 47                                       | 16.6600995 | 0.5646854  |
| <i>Mannophryne</i>    | <i>yustizi</i>       | 26     | 91.25              | 12.7  | 730                            | 0.0242849 | 0.0032619 | 722                                     | 0.0873518 | 0.0032613  | 8                                        | 11.4487929 | 0.0661241  |
| <i>Phyllobates</i>    | <i>aurotaenia</i>    | 108    | 59.10              | 5.0   | 583                            | 0.0291852 | 0.0057389 | 581                                     | 0.0657022 | 0.0033326  | 10                                       | 15.2187648 | 0.0406241  |
| <i>Phyllobates</i>    | <i>lugubris</i>      | 111    | 61.90              | 5.6   | 619                            | 0.0220081 | 0.0021129 | 609                                     | 0.0692430 | 0.0074838  | 10                                       | 14.4296268 | 0.3424533  |
| <i>Phyllobates</i>    | <i>lugubris</i>      | 112    | 87.50              | 14.1  | 509                            | 0.0215069 | 0.0036687 | 505                                     | 0.0638515 | 0.0024069  | 6                                        | 15.6508303 | 0.0636453  |
| <i>Phyllobates</i>    | <i>terribilis</i>    | 109    | 38.00              | 7.5   | 342                            | 0.0466930 | 0.0062899 | 333                                     | 0.1010120 | 0.0042610  | 9                                        | 9.9049683  | 0.0966529  |
| <i>Phyllobates</i>    | <i>vittatus</i>      | 110    | 72.65              | 10.3  | 3704                           | 0.0278407 | 0.0041983 | 3653                                    | 0.0716061 | 0.0071731  | 51                                       | 13.9745328 | 0.3603917  |
| <i>Rheobates</i>      | <i>palmatum</i>      | 28     | 160.25             | 51.2  | 1923                           | 0.0455460 | 0.0060619 | 1912                                    | 0.1086532 | 0.0136605  | 1923                                     | 9.3767026  | 0.3568515  |
| <i>Rheobates</i>      | <i>palmatum</i>      | 27     | 274.25             | 101.3 | 2194                           | 0.0435725 | 0.0087171 | 2187                                    | 0.0917531 | 0.0095110  | 2194                                     | 10.9755038 | 0.4814412  |
| <i>Silverstoneia</i>  | <i>flotator</i>      | 62     | 132.00             | 23.1  | 593                            | 0.0403710 | 0.0071023 | 589                                     | 0.2975722 | 0.0590597  | 6                                        | 3.3718047  | 0.3554388  |
| <i>Silverstoneia</i>  | <i>flotator</i>      | 63     | 49.86              | 7.2   | 382                            | 0.0300288 | 0.0076228 | 380                                     | 0.2000053 | 0.0230256  | 8                                        | 4.9876514  | 0.2140103  |
| <i>Silverstoneia</i>  | <i>nubicola</i>      | 66     | 17.90              | 2.5   | 756                            | 0.0283479 | 0.0052701 | 754                                     | 0.1084615 | 0.0144757  | 39                                       | 9.3497839  | 0.4217109  |
| <i>Silverstoneia</i>  | <i>nubicola</i>      | 65     | 127.00             | 4.2   | 247                            | 0.0880121 | 0.0037725 | 247                                     | 0.4396356 | 0.0277330  | 2                                        | 2.3356569  | 0.0672923  |
| <i>Silverstoneia</i>  | <i>nubicola</i>      | 64     | 96.57              | 51.2  | 729                            | 0.0211303 | 0.0043568 | 729                                     | 0.0866941 | 0.0108048  | 9                                        | 11.4138255 | 0.5252124  |
| <i>Anomaloglossus</i> | <i>stepheni</i>      | NA     | 6.0                | 1.4   | 150                            | 0.0222867 | 0.0022654 | 125                                     | 0.0538320 | 0.0011621  | 23                                       | 18.5668268 | 0.17074307 |
| <i>Allobates</i>      | <i>goianus</i>       | NA     | 1.00               | 0.0   | 8                              | 0.0362500 | 0.0027646 | 7                                       | 0.3940000 | 0.04714870 | 1                                        | 2.90065264 | 0.0000000  |
| <i>Hyloxalus</i>      | <i>anthracinus</i>   | NA     | 1.00               | 0.0   | 25                             | 0.1341200 | 0.0092706 | 22                                      | 4.0694545 | 0.89724827 | 3                                        | 0.24722956 | 0.01867090 |

Table S1 (Cont.) Temporal, spectral, and scaling variables from calls of poison frogs including phylogeny identifier (Phy ID), locality, call behavior, habit, temperature, size, number of recordings, multinote call features, units of repetition (UR), initial pulse-note, and middle pulse-note parameters.

| Genus            | Species                        | Phy ID | Middle Pulse-Note Rise Time (s) |           |           | Middle Pulse-Note Shape |           |           | Middle Pulse-Note Duty |           |           |
|------------------|--------------------------------|--------|---------------------------------|-----------|-----------|-------------------------|-----------|-----------|------------------------|-----------|-----------|
|                  |                                |        | N                               | $\bar{X}$ | SD        | N                       | $\bar{X}$ | SD        | N                      | $\bar{X}$ | SD        |
| <i>Allobates</i> | <i>algorei</i>                 | 60     | 108                             | 0.0330648 | 0.0116581 | 107                     | 0.6634112 | 0.2341092 | 106                    | 0.0694669 | 0.0212635 |
| <i>Allobates</i> | <i>brunneus</i>                | 37     | 261                             | 0.0118889 | 0.0022649 | 250                     | 0.2631834 | 0.0487823 | 247                    | 0.1174016 | 0.0391459 |
| <i>Allobates</i> | <i>caeruleodactylus</i>        | 48     | 476                             | 0.0062710 | 0.0027446 | 475                     | 0.2198105 | 0.0910626 | 492                    | 0.0603276 | 0.0190611 |
| <i>Allobates</i> | <i>crombiei</i>                | 52     | 591                             | 0.0110220 | 0.0039417 | 592                     | 0.2802786 | 0.0872654 | 572                    | 0.4331499 | 0.0779151 |
| <i>Allobates</i> | <i>femorialis</i>              | 43     | 596                             | 0.0370375 | 0.0123791 | 596                     | 0.3512586 | 0.1246984 | 586                    | 0.3863178 | 0.1038642 |
| <i>Allobates</i> | <i>femorialis</i>              | 46     | 72                              | 0.0320000 | 0.0056644 | 72                      | 0.4686697 | 0.0799884 | 24                     | 0.4825541 | 0.0762984 |
| <i>Allobates</i> | <i>femorialis</i>              | 44     | 30                              | 0.0316000 | 0.0050895 | 30                      | 0.3605654 | 0.0528371 | 15                     | 0.5329186 | 0.0270769 |
| <i>Allobates</i> | <i>femorialis</i>              | 40     | 84                              | 0.0172381 | 0.0043648 | 84                      | 0.3470257 | 0.0800290 | 42                     | 0.3474342 | 0.0195293 |
| <i>Allobates</i> | <i>femorialis</i>              | 41     | 182                             | 0.0172308 | 0.0034387 | 249                     | 0.2075361 | 0.0669728 | 239                    | 0.5365231 | 0.0529662 |
| <i>Allobates</i> | <i>femorialis</i>              | 45     | 66                              | 0.0472879 | 0.0094572 | 64                      | 0.5431535 | 0.0863586 | 34                     | 0.3924235 | 0.0323665 |
| <i>Allobates</i> | <i>granti</i>                  | 49     | 68                              | 0.0091912 | 0.0019259 | 68                      | 0.2852989 | 0.0591638 | 68                     | 0.6236771 | 0.0629945 |
| <i>Allobates</i> | <i>humilis</i>                 | 59     | 21                              | 0.0131905 | 0.0025616 | 21                      | 0.3377197 | 0.0501009 | 20                     | 0.1389570 | 0.0134131 |
| <i>Allobates</i> | <i>insperatus</i>              | 54     | 492                             | 0.0202053 | 0.0074021 | 490                     | 0.5670118 | 0.1978257 | 490                    | 0.4389565 | 0.0750280 |
| <i>Allobates</i> | <i>aff. insperatus</i>         | 55     | 65                              | 0.0183077 | 0.0034952 | 61                      | 0.5871967 | 0.0751795 | 64                     | 0.4071304 | 0.0367730 |
| <i>Allobates</i> | <i>juanii</i>                  | 47     | 215                             | 0.0186047 | 0.0074355 | 219                     | 0.4278530 | 0.1811290 | 218                    | 0.1343973 | 0.0395504 |
| <i>Allobates</i> | <i>kingsburyi</i>              | 39     | 992                             | 0.0107732 | 0.0040121 | 994                     | 0.2837240 | 0.1061993 | 990                    | 0.4801642 | 0.1412065 |
| <i>Allobates</i> | <i>marchesianus</i>            | 50     | 349                             | 0.0114413 | 0.0071964 | 329                     | 0.2384033 | 0.1489610 | 358                    | 0.2123252 | 0.0577469 |
| <i>Allobates</i> | <i>masniger</i>                | 58     | 481                             | 0.0297942 | 0.0113938 | 485                     | 0.4474982 | 0.1645063 | 496                    | 0.2441424 | 0.0660015 |
| <i>Allobates</i> | <i>midicola</i>                | 36     | 647                             | 0.0109892 | 0.0077568 | 648                     | 0.2836317 | 0.1060198 | 645                    | 0.1631505 | 0.0679518 |
| <i>Allobates</i> | <i>olfersioides</i>            | 1      | 260                             | 0.0087131 | 0.0027694 | 260                     | 0.2055701 | 0.0739388 | 258                    | 0.1185869 | 0.0182534 |
| <i>Allobates</i> | <i>ornatus</i>                 | 51     | 179                             | 0.0064413 | 0.0019861 | 188                     | 0.1834972 | 0.0601687 | 184                    | 0.0770337 | 0.0190828 |
| <i>Allobates</i> | <i>sp. Ducke</i>               | 61     | 807                             | 0.0144201 | 0.0042608 | 777                     | 0.3487880 | 0.1214639 | 782                    | 0.1680235 | 0.1052359 |
| <i>Allobates</i> | <i>sp. Neblina</i>             | 29     | 8                               | 0.0087500 | 0.0017525 | 10                      | 0.2658014 | 0.0826230 | 8                      | 0.0037879 | 0.0011470 |
| <i>Allobates</i> | <i>sp. Negro</i>               | 38     | 974                             | 0.0104045 | 0.0074231 | 972                     | 0.2893316 | 0.2087424 | 1002                   | 0.3527267 | 0.0654632 |
| <i>Allobates</i> | <i>sp. Shushufindi</i>         | 53     | 33                              | 0.0468485 | 0.0041917 | 33                      | 0.5840429 | 0.0598929 | 32                     | 0.2284268 | 0.0345553 |
| <i>Allobates</i> | <i>sp. Treviso (sp. small)</i> | 57     | 333                             | 0.0168328 | 0.0056956 | 333                     | 0.4753181 | 0.1423359 | 332                    | 0.1077074 | 0.0566224 |
| <i>Allobates</i> | <i>talamancae</i>              | 34     | 37                              | 0.0160541 | 0.0032570 | 38                      | 0.3467553 | 0.0799159 | 41                     | 0.6457490 | 0.0628059 |
| <i>Allobates</i> | <i>talamancae</i>              | 32     | 10                              | 0.0379167 | 0.0133720 | 11                      | 0.4363036 | 0.1592431 | 11                     | 0.6732289 | 0.1073654 |
| <i>Allobates</i> | <i>talamancae</i>              | 35     | 62                              | 0.0191613 | 0.0058343 | 61                      | 0.4376385 | 0.1221493 | 46                     | 0.3750640 | 0.0842841 |
| <i>Allobates</i> | <i>talamancae</i>              | 31     | 82                              | 0.0156098 | 0.0071315 | 81                      | 0.2471945 | 0.1147908 | 81                     | 0.7447007 | 0.0868726 |
| <i>Allobates</i> | <i>talamancae</i>              | 33     | 31                              | 0.0221290 | 0.0049715 | 30                      | 0.4900269 | 0.1111794 | 31                     | 0.5533149 | 0.0644312 |
| <i>Allobates</i> | <i>talamancae</i>              | 30     | 29                              | 0.0275862 | 0.0073218 | 26                      | 0.4763955 | 0.1485097 | 33                     | 0.6797647 | 0.0596741 |
| <i>Allobates</i> | <i>trilineatus</i>             | 56     | 132                             | 0.0047803 | 0.0018340 | 153                     | 0.1794854 | 0.0448856 | 153                    | 0.7984192 | 0.1431858 |
| <i>Allobates</i> | <i>zaparo</i>                  | 42     | 330                             | 0.0317485 | 0.0119018 | 332                     | 0.3881641 | 0.1534548 | 333                    | 0.8043987 | 0.1173595 |
| <i>Ameerega</i>  | <i>altamazonica</i>            | 103    | 456                             | 0.0301579 | 0.0091419 | 439                     | 0.5037717 | 0.1678136 | 435                    | 0.1121452 | 0.0171969 |

Table S1 (Cont.) Temporal, spectral, and scaling variables from calls of poison frogs including phylogeny identifier (Phy ID), locality, call behavior, habit, temperature, size, number of recordings, multinote call features, units of repetition (UR), initial pulse-note, and middle pulse-note parameters.

| Genus                 | Species                  | Phy ID | Middle Pulse-Note Rise Time (s) |           |           | Middle Pulse-Note Shape |           |           | Middle Pulse-Note Duty |           |           |
|-----------------------|--------------------------|--------|---------------------------------|-----------|-----------|-------------------------|-----------|-----------|------------------------|-----------|-----------|
|                       |                          |        | N                               | $\bar{X}$ | SD        | N                       | $\bar{X}$ | SD        | N                      | $\bar{X}$ | SD        |
| <i>Ameerega</i>       | <i>bassleri</i>          | 89     | 161                             | 0.0687081 | 0.0197017 | 156                     | 0.4029788 | 0.1630025 | 158                    | 0.3792967 | 0.1065206 |
| <i>Ameerega</i>       | <i>bilinguis</i>         | 87     | 1806                            | 0.0078815 | 0.0034106 | 1790                    | 0.2773218 | 0.1203660 | 1887                   | 0.4149509 | 0.0808697 |
| <i>Ameerega</i>       | <i>braccata</i>          | 94     | 79                              | 0.0127089 | 0.0035775 | 64                      | 0.3901309 | 0.0862029 | 78                     | 0.1683222 | 0.0161633 |
| <i>Ameerega</i>       | <i>cainarachi</i>        | 102    | 375                             | 0.0067147 | 0.0035729 | 374                     | 0.2215235 | 0.1454349 | 435                    | 0.2793312 | 0.0513741 |
| <i>Ameerega</i>       | <i>flavopicta</i>        | 95     | 484                             | 0.0063244 | 0.0032520 | 484                     | 0.4662159 | 0.2511903 | 424                    | 0.7020103 | 0.1539324 |
| <i>Ameerega</i>       | <i>hahneli</i>           | 96     | 38                              | 0.0089211 | 0.0032581 | 37                      | 0.2584160 | 0.0789233 | 37                     | 0.2332782 | 0.0480723 |
| <i>Ameerega</i>       | <i>hahneli</i>           | 97     | 1656                            | 0.0050664 | 0.0018628 | 1662                    | 0.3034801 | 0.1193283 | 1658                   | 0.0755908 | 0.0181624 |
| <i>Ameerega</i>       | <i>hahneli</i>           | 98     | 126                             | 0.0040317 | 0.0013968 | 128                     | 0.2450064 | 0.0935756 | 134                    | 0.1410349 | 0.0177896 |
| <i>Ameerega</i>       | <i>hahneli</i>           | 99     | 585                             | 0.0032239 | 0.0009842 | 592                     | 0.2260116 | 0.0670036 | 592                    | 0.0980333 | 0.0176234 |
| <i>Ameerega</i>       | <i>ignipedis</i>         | 90     | 22                              | 0.0368636 | 0.0039436 | 22                      | 0.3964230 | 0.0678240 | 21                     | 0.1603681 | 0.0378680 |
| <i>Ameerega</i>       | <i>parvula</i>           | 86     | 652                             | 0.0038037 | 0.0014596 | 648                     | 0.2955808 | 0.0993112 | 666                    | 0.3250642 | 0.0831121 |
| <i>Ameerega</i>       | <i>petersi</i>           | 101    | 247                             | 0.0228340 | 0.0035039 | 240                     | 0.7354466 | 0.0904933 | 241                    | 0.2680795 | 0.0426175 |
| <i>Ameerega</i>       | <i>picta</i>             | 91     | 46                              | 0.0115435 | 0.0021365 | 46                      | 0.2299342 | 0.0523866 | 45                     | 0.1397378 | 0.0172178 |
| <i>Ameerega</i>       | <i>picta</i>             | 92     | 1212                            | 0.0173218 | 0.0082582 | 1171                    | 0.3540239 | 0.1708448 | 1210                   | 0.1594757 | 0.0328317 |
| <i>Ameerega</i>       | <i>picta</i>             | 93     | 322                             | 0.0082081 | 0.0026446 | 321                     | 0.2991176 | 0.1063399 | 321                    | 0.1814615 | 0.0212197 |
| <i>Ameerega</i>       | <i>pongoensis</i>        | 88     | 7                               | 0.0144286 | 0.0052236 | 7                       | 0.1860674 | 0.0536466 | 4                      | 0.0352097 | 0.0072166 |
| <i>Ameerega</i>       | <i>silverstonei</i>      | 85     | 165                             | 0.0286303 | 0.0090744 | 157                     | 0.3529811 | 0.1170298 | 172                    | 0.2881531 | 0.0519432 |
| <i>Ameerega</i>       | <i>smaragdina</i>        | 100    | 47                              | 0.0124255 | 0.0091408 | 47                      | 0.2150455 | 0.0856520 | 47                     | 0.4311118 | 0.0579724 |
| <i>Ameerega</i>       | <i>trivittata</i>        | 105    | 92                              | 0.0296322 | 0.0111283 | 92                      | 0.4156166 | 0.1482436 | 91                     | 0.3165358 | 0.0491300 |
| <i>Ameerega</i>       | <i>trivittata</i>        | 107    | 109                             | 0.0281743 | 0.0060244 | 109                     | 0.4703710 | 0.1114375 | 109                    | 0.2986946 | 0.0525195 |
| <i>Ameerega</i>       | <i>trivittata</i>        | 106    | 506                             | 0.0216245 | 0.0046518 | 506                     | 0.3575383 | 0.0922566 | 503                    | 0.2743670 | 0.0488979 |
| <i>Ameerega</i>       | <i>trivittata</i>        | 104    | 69                              | 0.0238261 | 0.0063012 | 53                      | 0.4608394 | 0.0855914 | 69                     | 0.3127291 | 0.0612971 |
| <i>Anomaloglossus</i> | <i>baeobatrachus</i>     | 3      | 255                             | 0.0085412 | 0.0030529 | 256                     | 0.3271672 | 0.1135228 | 236                    | 0.3981216 | 0.0480935 |
| <i>Anomaloglossus</i> | <i>degranvillei</i>      | 4      | 32                              | 0.0477813 | 0.0163623 | 32                      | 0.4398042 | 0.1440832 | 30                     | 0.0783025 | 0.0075383 |
| <i>Anomaloglossus</i> | <i>rufilus</i>           | 5      | 13                              | 0.0168462 | 0.0023038 | 13                      | 0.3279465 | 0.0468532 | 17                     | 0.3181278 | 0.0295714 |
| <i>Anomaloglossus</i> | <i>verbeeksnyderorum</i> | 2      | 2144                            | 0.0119090 | 0.0053866 | 2144                    | 0.4332131 | 0.1929941 | 2129                   | 0.2536950 | 0.0523753 |
| <i>Aromobates</i>     | <i>meridensis</i>        | 7      | 17                              | 0.0341176 | 0.0102034 | 10                      | 0.6029578 | 0.0353266 | 16                     | 0.4828178 | 0.0366032 |
| <i>Aromobates</i>     | <i>saluensis</i>         | 11     | 273                             | 0.0111832 | 0.0065240 | 273                     | 0.2754576 | 0.1506447 | 271                    | 0.4094882 | 0.0372127 |
| <i>Aromobates</i>     | <i>cannatellai</i>       | 9      | 149                             | 0.0217092 | 0.0065493 | 149                     | 0.4742687 | 0.1240039 | 147                    | 0.2507718 | 0.0553440 |
| <i>Aromobates</i>     | aff. <i>saluensis</i>    | 10     | 304                             | 0.0453984 | 0.0215824 | 304                     | 0.4072456 | 0.2183427 | 301                    | 0.1531705 | 0.0502898 |
| <i>Aromobates</i>     | <i>ericksonae</i>        | 8      | 185                             | 0.0225000 | 0.0097646 | 185                     | 0.4330024 | 0.1805378 | 185                    | 0.7040179 | 0.2294547 |
| <i>Aromobates</i>     | <i>ornatissimus</i>      | 6      | 15                              | 0.0280667 | 0.0146554 | 15                      | 0.3119339 | 0.1418128 | 9                      | 0.0296418 | 0.0087487 |
| <i>Colostethus</i>    | <i>argyrogaster</i>      | 83     | 27                              | 0.0541481 | 0.0149324 | 29                      | 0.4671425 | 0.1446528 | 27                     | 0.0995231 | 0.0175930 |
| <i>Colostethus</i>    | <i>fraterdanieli</i>     | 81     | 397                             | 0.0293622 | 0.0074219 | 386                     | 0.4633070 | 0.1593409 | 387                    | 0.1110402 | 0.0233546 |
| <i>Colostethus</i>    | <i>fraterdanieli</i>     | 82     | 869                             | 0.0235512 | 0.0078424 | 868                     | 0.4357842 | 0.1755155 | 870                    | 0.1531024 | 0.0651150 |



Table S1 (Cont.) Temporal, spectral, and scaling variables from calls of poison frogs including phylogeny identifier (Phy ID), locality, call behavior, habit, temperature, size, number of recordings, multinote call features, units of repetition (UR), initial pulse-note, and middle pulse-note parameters.

| Genus               | Species                  | Phy ID | Middle Pulse-Note Rise Time (s) |           |           | Middle Pulse-Note Shape |           |           | Middle Pulse-Note Duty |           |           |
|---------------------|--------------------------|--------|---------------------------------|-----------|-----------|-------------------------|-----------|-----------|------------------------|-----------|-----------|
|                     |                          |        | N                               | $\bar{X}$ | SD        | N                       | $\bar{X}$ | SD        | N                      | $\bar{X}$ | SD        |
| <i>Colostethus</i>  | <i>fugax</i>             | 84     | 131                             | 0.0427008 | 0.0109945 | 127                     | 0.4377629 | 0.1200288 | 123                    | 0.0456354 | 0.0147331 |
| <i>Colostethus</i>  | <i>panamansis</i>        | 76     | 118                             | 0.0183644 | 0.0086397 | 108                     | 0.4001342 | 0.1770980 | 111                    | 0.4357834 | 0.0372315 |
| <i>Colostethus</i>  | <i>panamansis</i>        | 75     | 142                             | 0.0177254 | 0.0073919 | 138                     | 0.5032804 | 0.1904150 | 137                    | 0.4293984 | 0.0416227 |
| <i>Colostethus</i>  | <i>pratti</i>            | 80     | 301                             | 0.0329635 | 0.0054260 | 300                     | 0.4702322 | 0.0953584 | 306                    | 0.3553289 | 0.0518576 |
| <i>Colostethus</i>  | <i>pratti</i>            | 79     | 275                             | 0.0318691 | 0.0081843 | 274                     | 0.5328009 | 0.1416073 | 277                    | 0.2929472 | 0.0553721 |
| <i>Colostethus</i>  | <i>pratti</i>            | 77     | 19                              | 0.0214737 | 0.0082622 | 16                      | 0.3337183 | 0.1153700 | 17                     | 0.3502506 | 0.0288445 |
| <i>Colostethus</i>  | aff. <i>pratti</i>       | 78     | 178                             | 0.0224326 | 0.0077895 | 178                     | 0.5554061 | 0.2051669 | 175                    | 0.3444335 | 0.0580444 |
| <i>Dendrobates</i>  | <i>auratus</i>           | 116    | 318                             | 0.0046981 | 0.0024060 | 297                     | 0.6803070 | 0.3479475 | 367                    | 0.4204355 | 0.0775776 |
| <i>Dendrobates</i>  | <i>bombetes</i>          | 126    | 1800                            | 0.0016244 | 0.0006661 | 1697                    | 0.6744619 | 0.2709660 | 2268                   | 0.4482456 | 0.2862875 |
| <i>Dendrobates</i>  | <i>captivus</i>          | 125    | 294                             | 0.0062857 | 0.0026009 | 291                     | 0.4222537 | 0.1674385 | 284                    | 0.7294448 | 0.1094840 |
| <i>Dendrobates</i>  | <i>castaneoticus</i>     | 114    | 582                             | 0.0019759 | 0.0008062 | 498                     | 0.3959050 | 0.1328811 | 624                    | 0.4724639 | 0.0886171 |
| <i>Dendrobates</i>  | <i>claudiae</i>          | 130    | 173                             | 0.0033873 | 0.0022008 | 173                     | 0.4570626 | 0.2293916 | 268                    | 0.4028542 | 0.0765119 |
| <i>Dendrobates</i>  | <i>defleri</i>           | 133    | 205                             | 0.0023951 | 0.0009777 | 200                     | 0.4454762 | 0.1816884 | 192                    | 0.5290725 | 0.1114048 |
| <i>Dendrobates</i>  | <i>fantasticus</i>       | 137    | 77                              | 0.0092338 | 0.0026601 | 76                      | 0.5323168 | 0.1514630 | 81                     | 0.7601834 | 0.0937657 |
| <i>Dendrobates</i>  | <i>galactonotus</i>      | 113    | 467                             | 0.0030578 | 0.0015692 | 416                     | 0.4353596 | 0.1957725 | 554                    | 0.4538214 | 0.1209767 |
| <i>Dendrobates</i>  | <i>granuliferus</i>      | 119    | 932                             | 0.0035526 | 0.0017424 | 821                     | 0.8607810 | 0.4134147 | 1395                   | 0.5560250 | 0.1435498 |
| <i>Dendrobates</i>  | <i>histrionicus</i>      | 121    | 331                             | 0.0015317 | 0.0005837 | 323                     | 0.6104747 | 0.2630208 | 445                    | 0.7703745 | 0.1868168 |
| <i>Dendrobates</i>  | <i>imitator</i>          | 131    | 1297                            | 0.0028234 | 0.0011904 | 1229                    | 0.2814171 | 0.1096499 | 1327                   | 0.3718492 | 0.0982734 |
| <i>Dendrobates</i>  | <i>lamasi (sirensis)</i> | 132    | 80                              | 0.0026750 | 0.0008233 | 95                      | 0.2555457 | 0.0993579 | 101                    | 0.2362839 | 0.0338517 |
| <i>Dendrobates</i>  | <i>leucomelas</i>        | 118    | 2429                            | 0.0070807 | 0.0033089 | 2416                    | 0.4829780 | 0.1843199 | 2412                   | 0.2538342 | 0.0597575 |
| <i>Dendrobates</i>  | <i>minutus</i>           | 128    | 54                              | 0.0031111 | 0.0017555 | 26                      | 0.4250000 | 0.1827111 | 88                     | 0.3102941 | 0.1019126 |
| <i>Dendrobates</i>  | <i>mysteriosus</i>       | 124    | 1231                            | 0.0032242 | 0.0011007 | 1226                    | 0.3162028 | 0.1060814 | 1281                   | 0.5317772 | 0.1099836 |
| <i>Dendrobates</i>  | <i>pumilio</i>           | 123    | 705                             | 0.0014170 | 0.0004934 | 606                     | 0.7057206 | 0.2481082 | 1112                   | 0.7232464 | 0.2506915 |
| <i>Dendrobates</i>  | <i>pumilio</i>           | 122    | 324                             | 0.0026392 | 0.0012324 | 324                     | 0.8800469 | 0.3918458 | 293                    | 0.7757551 | 0.2550365 |
| <i>Dendrobates</i>  | <i>reticulatus</i>       | 136    | 237                             | 0.0014093 | 0.0004927 | 215                     | 0.8441860 | 0.2321198 | 363                    | 0.4739691 | 0.2210597 |
| <i>Dendrobates</i>  | <i>sp. Quibdo</i>        | 129    | 774                             | 0.0016848 | 0.0007656 | 738                     | 0.5554426 | 0.2523583 | 967                    | 0.3594209 | 0.1200733 |
| <i>Dendrobates</i>  | <i>sylvaticus</i>        | 120    | 231                             | 0.0015541 | 0.0004981 | 225                     | 0.7490370 | 0.2513265 | 355                    | 0.7717706 | 0.2765205 |
| <i>Dendrobates</i>  | <i>tinctorius</i>        | 117    | 240                             | 0.0015750 | 0.0006226 | 240                     | 0.7388889 | 0.3130015 | 345                    | 0.3014623 | 0.0803668 |
| <i>Dendrobates</i>  | <i>truncatus</i>         | 115    | 541                             | 0.0073826 | 0.0039604 | 525                     | 0.7132043 | 0.3900544 | 694                    | 0.5182223 | 0.1014080 |
| <i>Dendrobates</i>  | <i>uakarii</i>           | 138    | 37                              | 0.0062432 | 0.0026709 | 30                      | 0.5320109 | 0.1835721 | 29                     | 0.6671347 | 0.0599082 |
| <i>Dendrobates</i>  | <i>variabilis</i>        | 135    | 627                             | 0.0014211 | 0.0005205 | 627                     | 0.9537480 | 0.3816031 | 1128                   | 0.4542413 | 0.2308406 |
| <i>Dendrobates</i>  | <i>ventrimaculatus</i>   | 134    | 520                             | 0.0024704 | 0.0012615 | 520                     | 0.8691429 | 0.3735810 | 505                    | 0.6203865 | 0.2179025 |
| <i>Dendrobates</i>  | <i>ventrimaculatus</i>   | 139    | 355                             | 0.0010000 | 0.0000000 | 355                     | 0.7415254 | 0.2502100 | 565                    | 0.4086796 | 0.2187823 |
| <i>Dendrobates</i>  | <i>virelinensis</i>      | 127    | 2210                            | 0.0011166 | 0.0008833 | 1571                    | 0.6512913 | 0.3595729 | 2170                   | 0.2845081 | 0.2662268 |
| <i>Epipedobates</i> | <i>anthonyi</i>          | 71     | 435                             | 0.0099908 | 0.0029363 | 435                     | 0.3398331 | 0.1112966 | 435                    | 0.4813956 | 0.0743734 |

Table S1 (Cont.) Temporal, spectral, and scaling variables from calls of poison frogs including phylogeny identifier (Phy ID), locality, call behavior, habit, temperature, size, number of recordings, multinote call features, units of repetition (UR), initial pulse-note, and middle pulse-note parameters.

| Genus               | Species                     | Phy ID | Middle Pulse-Note Rise Time (s) |           |           | Middle Pulse-Note Shape |           |           | Middle Pulse-Note Duty |           |           |
|---------------------|-----------------------------|--------|---------------------------------|-----------|-----------|-------------------------|-----------|-----------|------------------------|-----------|-----------|
|                     |                             |        | N                               | $\bar{X}$ | SD        | N                       | $\bar{X}$ | SD        | N                      | $\bar{X}$ | SD        |
| <i>Epipedobates</i> | <i>anthonyi</i>             | 70     | 1041                            | 0.0099885 | 0.0032769 | 1021                    | 0.3948542 | 0.1160797 | 1077                   | 0.4856616 | 0.0943870 |
| <i>Epipedobates</i> | <i>boulengeri</i>           | 67     | 252                             | 0.0052976 | 0.0026933 | 240                     | 0.3989530 | 0.2035503 | 253                    | 0.5868460 | 0.0920582 |
| <i>Epipedobates</i> | <i>espinosai</i>            | 69     | 738                             | 0.0030591 | 0.0016475 | 738                     | 0.3748180 | 0.1713293 | 723                    | 0.3927811 | 0.1368654 |
| <i>Epipedobates</i> | <i>machalilla</i>           | 73     | 331                             | 0.0045992 | 0.0021072 | 331                     | 0.2463988 | 0.1254379 | 332                    | 0.3578173 | 0.0586020 |
| <i>Epipedobates</i> | <i>machalilla</i>           | 72     | 3947                            | 0.0036018 | 0.0012976 | 3947                    | 0.2963875 | 0.1069409 | 3947                   | 0.3668982 | 0.0642383 |
| <i>Epipedobates</i> | <i>sp. F darwinwallacei</i> | 68     | 1350                            | 0.0031696 | 0.0015417 | 1257                    | 0.3442192 | 0.1293911 | 1329                   | 0.3397777 | 0.0578523 |
| <i>Epipedobates</i> | <i>tricolor</i>             | 74     | 776                             | 0.0063170 | 0.0021451 | 755                     | 0.3881905 | 0.1352924 | 783                    | 0.4706379 | 0.0614968 |
| <i>Hyloxalus</i>    | <i>sp. Agua Azul</i>        | 142    | 149                             | 0.0112416 | 0.0056779 | 143                     | 0.4871435 | 0.2062897 | 147                    | 0.1849552 | 0.0374478 |
| <i>Hyloxalus</i>    | <i>awa</i>                  | 171    | 466                             | 0.0211481 | 0.0095400 | 467                     | 0.3398655 | 0.1674328 | 477                    | 0.4083662 | 0.0748406 |
| <i>Hyloxalus</i>    | <i>azureiventris</i>        | 165    | 712                             | 0.0042107 | 0.0019139 | 712                     | 0.2779189 | 0.1199471 | 716                    | 0.2447121 | 0.0802164 |
| <i>Hyloxalus</i>    | <i>bocagei</i>              | 151    | 574                             | 0.0046307 | 0.0033126 | 580                     | 0.1670728 | 0.1246736 | 592                    | 0.3116478 | 0.0375284 |
| <i>Hyloxalus</i>    | <i>bocagei</i>              | 150    | 694                             | 0.0110704 | 0.0051921 | 695                     | 0.3941051 | 0.2012171 | 716                    | 0.2970620 | 0.0932062 |
| <i>Hyloxalus</i>    | <i>craspedocephs</i>        | 166    | 127                             | 0.0042992 | 0.0022967 | 120                     | 0.7036508 | 0.3684331 | 147                    | 0.8187156 | 0.1128423 |
| <i>Hyloxalus</i>    | <i>aff. delatorreae</i>     | 163    | 76                              | 0.0046184 | 0.0022684 | 75                      | 0.6405382 | 0.3303245 | 85                     | 0.7181105 | 0.1787721 |
| <i>Hyloxalus</i>    | <i>delatorreae</i>          | 162    | 194                             | 0.0040361 | 0.0019271 | 184                     | 0.5652876 | 0.2663732 | 190                    | 0.6875553 | 0.1124038 |
| <i>Hyloxalus</i>    | <i>elachyhistus</i>         | 169    | 286                             | 0.0172762 | 0.0060845 | 284                     | 0.3227474 | 0.1147484 | 321                    | 0.0506490 | 0.0231093 |
| <i>Hyloxalus</i>    | <i>elachyhistus</i>         | 168    | 153                             | 0.0537320 | 0.0234378 | 165                     | 0.4872597 | 0.2449803 | 164                    | 0.1399832 | 0.0335010 |
| <i>Hyloxalus</i>    | <i>erythromos</i>           | 140    | 436                             | 0.0028960 | 0.0013583 | 268                     | 0.5215935 | 0.1948906 | 433                    | 1.0293897 | 0.2664426 |
| <i>Hyloxalus</i>    | <i>infraguttatus</i>        | 170    | 1607                            | 0.0128245 | 0.0066472 | 1607                    | 0.2102231 | 0.1111281 | 1596                   | 0.1406837 | 0.0297927 |
| <i>Hyloxalus</i>    | <i>insulatus</i>            | 167    | 347                             | 0.0245994 | 0.0155390 | 348                     | 0.3076355 | 0.1977440 | 364                    | 0.2055057 | 0.0531726 |
| <i>Hyloxalus</i>    | <i>italoi</i>               | 144    | 2286                            | 0.0209930 | 0.0095407 | 2257                    | 0.5282690 | 0.2372464 | 2273                   | 0.4642462 | 0.1009102 |
| <i>Hyloxalus</i>    | <i>jacobuspetersi</i>       | 152    | 113                             | 0.1744867 | 0.0370049 | 114                     | 0.5755009 | 0.1086809 | 106                    | 0.0849689 | 0.0324374 |
| <i>Hyloxalus</i>    | <i>maculosus</i>            | 149    | 334                             | 0.0144281 | 0.0070816 | 334                     | 0.3157129 | 0.1567098 | 334                    | 0.4482397 | 0.0572235 |
| <i>Hyloxalus</i>    | <i>sp. Negro</i>            | 164    | 170                             | 0.0391941 | 0.0175426 | 171                     | 0.4498063 | 0.1675173 | 172                    | 0.3458441 | 0.0894154 |
| <i>Hyloxalus</i>    | <i>nexipus</i>              | 154    | 827                             | 0.0127074 | 0.0052577 | 806                     | 0.4344829 | 0.1729922 | 829                    | 0.4103654 | 0.0476349 |
| <i>Hyloxalus</i>    | <i>aff. nexipus</i>         | 156    | 151                             | 0.0111854 | 0.0068444 | 126                     | 0.3799853 | 0.2190058 | 150                    | 0.3524227 | 0.0513674 |
| <i>Hyloxalus</i>    | <i>aff. nexipus</i>         | 155    | 472                             | 0.0100983 | 0.0036252 | 472                     | 0.4771532 | 0.1498212 | 471                    | 0.2962881 | 0.0751507 |
| <i>Hyloxalus</i>    | <i>pulchellus</i>           | 160    | 41                              | 0.0289512 | 0.0026547 | 38                      | 0.4288477 | 0.0388004 | 39                     | 0.1686456 | 0.0211704 |
| <i>Hyloxalus</i>    | <i>pulchellus</i>           | 159    | 215                             | 0.0236744 | 0.0129216 | 216                     | 0.3340474 | 0.1646552 | 150                    | 0.1523539 | 0.0331105 |
| <i>Hyloxalus</i>    | <i>aff. pulchellus</i>      | 161    | 160                             | 0.0200063 | 0.0098316 | 149                     | 0.4551098 | 0.2058757 | 152                    | 0.3868192 | 0.0614877 |
| <i>Hyloxalus</i>    | <i>cf. pulcherrimus</i>     | 153    | 73                              | 0.0186027 | 0.0055521 | 74                      | 0.3810879 | 0.1118532 | 73                     | 0.0876784 | 0.0083101 |
| <i>Hyloxalus</i>    | <i>sauli</i>                | 148    | 7484                            | 0.0040218 | 0.0014513 | 7483                    | 0.2494545 | 0.0784443 | 7476                   | 0.3037792 | 0.0413595 |
| <i>Hyloxalus</i>    | <i>sorditatus</i>           | 141    | 270                             | 0.0281111 | 0.0134143 | 269                     | 0.4311209 | 0.1919032 | 271                    | 0.6091136 | 0.1074789 |
| <i>Hyloxalus</i>    | <i>subpunctatus</i>         | 143    | 43                              | 0.0088974 | 0.0022454 | 37                      | 0.3545067 | 0.0942627 | 39                     | 0.0275960 | 0.0045747 |
| <i>Hyloxalus</i>    | <i>toachi</i>               | 172    | 1115                            | 0.0205112 | 0.0085844 | 1101                    | 0.3321714 | 0.1395326 | 1108                   | 0.1534447 | 0.0370988 |

Table S1 (Cont.) Temporal, spectral, and scaling variables from calls of poison frogs including phylogeny identifier (Phy ID), locality, call behavior, habit, temperature, size, number of recordings, multinote call features, units of repetition (UR), initial pulse-note, and middle pulse-note parameters.

| Genus                 | Species              | Phy ID | Middle Pulse-Note Rise Time (s) |           |            | Middle Pulse-Note Shape |            |            | Middle Pulse-Note Duty |           |            |
|-----------------------|----------------------|--------|---------------------------------|-----------|------------|-------------------------|------------|------------|------------------------|-----------|------------|
|                       |                      |        | N                               | $\bar{X}$ | SD         | N                       | $\bar{X}$  | SD         | N                      | $\bar{X}$ | SD         |
| <i>Hyloxalus</i>      | <i>vertebralis</i>   | 157    | 246                             | 0.0254553 | 0.0095445  | 243                     | 0.3887869  | 0.1561679  | 245                    | 0.1063271 | 0.0138274  |
| <i>Hyloxalus</i>      | <i>vertebralis</i>   | 158    | 300                             | 0.0097700 | 0.0049082  | 301                     | 0.1826414  | 0.0949628  | 295                    | 0.0647460 | 0.0178695  |
| <i>Hyloxalus</i>      | <i>yasuni</i>        | 147    | 1110                            | 0.0207838 | 0.0089411  | 1033                    | 0.5186828  | 0.1664566  | 1032                   | 0.4840162 | 0.0643395  |
| <i>Hyloxalus</i>      | <i>yasuni</i>        | 145    | 1943                            | 0.0148188 | 0.0090733  | 1938                    | 0.3383471  | 0.2312449  | 1927                   | 0.5229896 | 0.1646768  |
| <i>Hyloxalus</i>      | <i>yasuni</i>        | 146    | 1899                            | 0.0213802 | 0.0056058  | 1898                    | 0.7261041  | 0.1773796  | 1905                   | 0.4105204 | 0.0507083  |
| <i>Mannophryne</i>    | <i>urticans</i>      | 25     | 336                             | 0.0070655 | 0.0025360  | 334                     | 0.3988260  | 0.1405884  | 332                    | 0.1886968 | 0.0257223  |
| <i>Mannophryne</i>    | <i>cordilleriana</i> | 20     | 522                             | 0.0085339 | 0.0041602  | 516                     | 0.2220114  | 0.1727558  | 548                    | 0.3771569 | 0.1009642  |
| <i>Mannophryne</i>    | <i>herminae</i>      | 19     | 427                             | 0.0096492 | 0.0050342  | 427                     | 0.3122038  | 0.1657710  | 427                    | 0.4681340 | 0.1577356  |
| <i>Mannophryne</i>    | <i>sp. Guatopo</i>   | 15     | 116                             | 0.0150948 | 0.0083385  | 116                     | 0.3912028  | 0.1596673  | 116                    | 0.5898703 | 0.0809944  |
| <i>Mannophryne</i>    | <i>leonardoi</i>     | 16     | 402                             | 0.0091547 | 0.0045316  | 402                     | 0.3008077  | 0.1548908  | 374                    | 0.4630670 | 0.0800055  |
| <i>Mannophryne</i>    | <i>olmonae</i>       | 12     | 123                             | 0.0509643 | 0.0099040  | 123                     | 0.5930804  | 0.1092226  | 122                    | 0.2623772 | 0.0337258  |
| <i>Mannophryne</i>    | <i>orellana</i>      | 22     | 194                             | 0.0173196 | 0.0056834  | 182                     | 0.4155466  | 0.1341204  | 176                    | 0.4680275 | 0.0578802  |
| <i>Mannophryne</i>    | <i>orellana</i>      | 21     | 1548                            | 0.0256658 | 0.0072095  | 1517                    | 0.5323269  | 0.1415630  | 1498                   | 0.3588589 | 0.0724711  |
| <i>Mannophryne</i>    | <i>riveroi</i>       | 13     | 251                             | 0.0300996 | 0.0128041  | 256                     | 0.2642270  | 0.1249779  | 272                    | 0.3148628 | 0.0477743  |
| <i>Mannophryne</i>    | <i>trinitatis</i>    | 17     | 47                              | 0.0241702 | 0.0069854  | 47                      | 0.5366207  | 0.0987678  | 47                     | 0.5967261 | 0.0455252  |
| <i>Mannophryne</i>    | <i>collaris</i>      | 23     | 680                             | 0.0197897 | 0.0073454  | 646                     | 0.4342811  | 0.1254702  | 648                    | 0.3539728 | 0.0843142  |
| <i>Mannophryne</i>    | <i>collaris</i>      | 24     | 520                             | 0.0182481 | 0.0064085  | 518                     | 0.4821053  | 0.1509634  | 525                    | 0.3356973 | 0.0514813  |
| <i>Mannophryne</i>    | <i>venezuelensis</i> | 18     | 177                             | 0.0241356 | 0.0080343  | 177                     | 0.3116804  | 0.1067731  | 187                    | 0.4740485 | 0.0658528  |
| <i>Mannophryne</i>    | <i>vulcano</i>       | 14     | 47                              | 0.0099333 | 0.0035123  | 47                      | 0.3938879  | 0.1170875  | 44                     | 0.3920457 | 0.0360098  |
| <i>Mannophryne</i>    | <i>yustizi</i>       | 26     | 730                             | 0.0062027 | 0.0026641  | 691                     | 0.2590719  | 0.1024935  | 722                    | 0.2790286 | 0.0361725  |
| <i>Phyllobates</i>    | <i>aurotaenia</i>    | 108    | 566                             | 0.0150141 | 0.0035213  | 567                     | 0.5166973  | 0.1386937  | 555                    | 0.4478024 | 0.0873701  |
| <i>Phyllobates</i>    | <i>lugubris</i>      | 111    | 619                             | 0.0123344 | 0.0024454  | 619                     | 0.5596942  | 0.0927847  | 609                    | 0.3195446 | 0.0384263  |
| <i>Phyllobates</i>    | <i>lugubris</i>      | 112    | 525                             | 0.0112876 | 0.0038576  | 525                     | 0.5307633  | 0.1753462  | 519                    | 0.3388395 | 0.0699175  |
| <i>Phyllobates</i>    | <i>terribilis</i>    | 109    | 309                             | 0.0199094 | 0.0100630  | 303                     | 0.4377032  | 0.2055819  | 333                    | 0.4623317 | 0.0650089  |
| <i>Phyllobates</i>    | <i>vittatus</i>      | 110    | 3704                            | 0.0149104 | 0.0051660  | 3665                    | 0.5436793  | 0.1778246  | 3653                   | 0.3899438 | 0.0589196  |
| <i>Rheobates</i>      | <i>palmatus</i>      | 28     | 1885                            | 0.0122318 | 0.0074812  | 1892                    | 0.2685416  | 0.1563149  | 1912                   | 0.4221010 | 0.0627023  |
| <i>Rheobates</i>      | <i>palmatus</i>      | 27     | 2194                            | 0.0204434 | 0.0072812  | 2194                    | 0.4752307  | 0.1594321  | 2187                   | 0.4762717 | 0.0928472  |
| <i>Silverstoneia</i>  | <i>flotator</i>      | 62     | 593                             | 0.0152142 | 0.0061010  | 586                     | 0.3855525  | 0.1589454  | 589                    | 0.1406392 | 0.0351323  |
| <i>Silverstoneia</i>  | <i>flotator</i>      | 63     | 372                             | 0.0091048 | 0.0040111  | 379                     | 0.3120902  | 0.1495699  | 378                    | 0.1511110 | 0.0301316  |
| <i>Silverstoneia</i>  | <i>nubicola</i>      | 66     | 749                             | 0.0107023 | 0.0048668  | 748                     | 0.3711628  | 0.1422967  | 749                    | 0.2658650 | 0.0592286  |
| <i>Silverstoneia</i>  | <i>nubicola</i>      | 65     | 243                             | 0.0657695 | 0.0081583  | 242                     | 0.7386071  | 0.1199067  | 243                    | 0.2006989 | 0.0130564  |
| <i>Silverstoneia</i>  | <i>nubicola</i>      | 64     | 725                             | 0.0070910 | 0.0032739  | 718                     | 0.3471548  | 0.1643157  | 721                    | 0.2496712 | 0.0641221  |
| <i>Anomaloglossus</i> | <i>stepheni</i>      | NA     | 129                             | 0.0092093 | 0.00233410 | 139                     | 0.4084548  | 0.1214462  | 123                    | 0.4073510 | 0.03694984 |
| <i>Allobates</i>      | <i>goianus</i>       | NA     | 7                               | 0.0230000 | 0.00412311 | 6                       | 0.60970742 | 0.14554611 | 7                      | 0.0929524 | 0.00668119 |
| <i>Hyloxalus</i>      | <i>anthracinus</i>   | NA     | 12                              | 0.0697500 | 0.01763326 | 18                      | 0.54047963 | 0.10193034 | 20                     | 0.0340411 | 0.00612586 |

Table S1 (Cont.) Temporal, spectral, and scaling variables from calls of poison frogs including phylogeny identifier (Phy ID), locality, call behavior, habit, temperature, size, number of recordings, multinote call features, units of repetition (UR), initial pulse-note, and middle pulse-note parameters.

| Genus            | Species                        | Phy ID | Initial Q1 (Hz) |           |         | Initial Peak Frequency (Hz) |           |         | Initial Q3 (Hz) |           |         | Initial Modulation (Q1 – Q3) |
|------------------|--------------------------------|--------|-----------------|-----------|---------|-----------------------------|-----------|---------|-----------------|-----------|---------|------------------------------|
|                  |                                |        | N               | $\bar{X}$ | SD      | N                           | $\bar{X}$ | SD      | N               | $\bar{X}$ | SD      |                              |
| <i>Allobates</i> | <i>algorei</i>                 | 60     | 65              | 4641.248  | 29.265  | 65                          | 4997.162  | 120.777 | 65              | 5011.373  | 29.895  | 370.125                      |
| <i>Allobates</i> | <i>brunneus</i>                | 37     | 261             | 5315.127  | 69.603  | 261                         | 5383.111  | 83.325  | 261             | 5493.356  | 60.232  | 178.230                      |
| <i>Allobates</i> | <i>caeruleodactylus</i>        | 48     | 488             | 6048.718  | 231.419 | 488                         | 6083.891  | 170.529 | 488             | 6459.993  | 298.436 | 411.275                      |
| <i>Allobates</i> | <i>crombiei</i>                | 52     | 47              | 4827.066  | 25.133  | 47                          | 4893.053  | 85.470  | 47              | 5017.694  | 68.317  | 190.628                      |
| <i>Allobates</i> | <i>femorialis</i>              | 43     | 192             | 3199.403  | 120.897 | 192                         | 3292.474  | 150.348 | 192             | 3324.442  | 161.303 | 125.039                      |
| <i>Allobates</i> | <i>femorialis</i>              | 46     | 24              | 3445.300  | 0.000   | 24                          | 3567.346  | 80.000  | 24              | 3631.950  | 48.617  | 186.650                      |
| <i>Allobates</i> | <i>femorialis</i>              | 44     | 15              | 2885.400  | 0.000   | 15                          | 2932.092  | 22.193  | 15              | 3011.017  | 12.413  | 125.617                      |
| <i>Allobates</i> | <i>femorialis</i>              | 40     | 42              | 3327.587  | 34.413  | 42                          | 3407.973  | 45.653  | 42              | 3647.365  | 112.801 | 319.779                      |
| <i>Allobates</i> | <i>femorialis</i>              | 41     | 249             | 3298.883  | 63.581  | 249                         | 3406.543  | 60.219  | 249             | 3475.447  | 61.061  | 176.563                      |
| <i>Allobates</i> | <i>femorialis</i>              | 45     | 38              | 2758.994  | 24.698  | 38                          | 2835.416  | 72.154  | 38              | 2895.135  | 21.426  | 136.142                      |
| <i>Allobates</i> | <i>granti</i>                  | 49     | 51              | 5915.296  | 74.992  | 51                          | 6064.776  | 120.502 | 51              | 6115.435  | 108.617 | 200.139                      |
| <i>Allobates</i> | <i>humilis</i>                 | 59     | 21              | 4505.581  | 21.447  | 21                          | 4542.476  | 22.006  | 21              | 4638.857  | 38.850  | 133.276                      |
| <i>Allobates</i> | <i>insperatus</i>              | 54     | 17              | 4663.835  | 241.106 | 17                          | 4861.968  | 347.779 | 17              | 4907.178  | 324.132 | 243.342                      |
| <i>Allobates</i> | <i>aff. insperatus</i>         | 55     | 7               | 5371.000  | 192.134 | 7                           | 5672.457  | 188.895 | 7               | 5679.388  | 168.284 | 308.388                      |
| <i>Allobates</i> | <i>juanii</i>                  | 47     | 42              | 4096.433  | 240.672 | 44                          | 4337.943  | 273.386 | 38              | 4401.837  | 287.980 | 305.404                      |
| <i>Allobates</i> | <i>kingsburyi</i>              | 39     | 56              | 4470.441  | 38.019  | 56                          | 4572.725  | 51.356  | 56              | 4617.341  | 39.155  | 146.900                      |
| <i>Allobates</i> | <i>marchesianus</i>            | 50     | 326             | 5678.458  | 32.493  | 362                         | 5681.402  | 189.681 | 120             | 6125.501  | 85.920  | 447.043                      |
| <i>Allobates</i> | <i>masniger</i>                | 58     | 98              | 4327.721  | 86.841  | 96                          | 4528.692  | 145.654 | 97              | 4599.660  | 109.201 | 271.938                      |
| <i>Allobates</i> | <i>nidicola</i>                | 36     | 648             | 4477.318  | 183.482 | 648                         | 4572.078  | 164.458 | 648             | 4631.220  | 147.350 | 153.902                      |
| <i>Allobates</i> | <i>olfersioides</i>            | 1      | 258             | 4892.547  | 75.777  | 258                         | 4948.065  | 75.174  | 258             | 5002.040  | 86.648  | 109.493                      |
| <i>Allobates</i> | <i>ornatus</i>                 | 51     | 60              | 5394.063  | 65.202  | 60                          | 5438.560  | 60.434  | 60              | 5566.907  | 63.838  | 172.844                      |
| <i>Allobates</i> | <i>sp. Ducke</i>               | 61     | 801             | 5978.320  | 97.634  | 801                         | 6261.783  | 121.810 | 800             | 6379.185  | 35.654  | 400.865                      |
| <i>Allobates</i> | <i>sp. Neblina</i>             | 29     | 7               | 4423.514  | 115.847 | 7                           | 4626.543  | 102.074 | 9               | 4675.100  | 43.648  | 251.586                      |
| <i>Allobates</i> | <i>sp. Negro</i>               | 38     | 34              | 4307.894  | 83.128  | 41                          | 4462.085  | 163.671 | 32              | 4581.175  | 141.262 | 273.281                      |
| <i>Allobates</i> | <i>sp. Shushufindi</i>         | 53     | 11              | 4431.918  | 44.972  | 10                          | 4776.070  | 68.693  | 11              | 4815.609  | 89.942  | 383.691                      |
| <i>Allobates</i> | <i>sp. Treviso (sp. small)</i> | 57     | 341             | 5402.860  | 99.279  | 341                         | 5568.087  | 149.643 | 341             | 5653.471  | 80.772  | 250.611                      |
| <i>Allobates</i> | <i>talamancae</i>              | 34     | 34              | 3806.300  | 84.148  | 34                          | 4055.818  | 168.123 | 33              | 4189.170  | 56.229  | 382.870                      |
| <i>Allobates</i> | <i>talamancae</i>              | 32     | 15              | 3864.500  | 55.122  | 15                          | 4039.613  | 142.087 | 13              | 4164.177  | 163.410 | 299.677                      |
| <i>Allobates</i> | <i>talamancae</i>              | 35     | 22              | 3969.941  | 57.391  | 21                          | 4253.314  | 101.838 | 22              | 4306.632  | 91.126  | 336.691                      |
| <i>Allobates</i> | <i>talamancae</i>              | 31     | 33              | 4130.458  | 125.726 | 33                          | 4285.758  | 148.058 | 33              | 4370.582  | 110.395 | 240.124                      |
| <i>Allobates</i> | <i>talamancae</i>              | 33     | 27              | 3890.630  | 73.541  | 28                          | 4118.300  | 197.517 | 27              | 4258.678  | 110.063 | 368.048                      |
| <i>Allobates</i> | <i>talamancae</i>              | 30     | 43              | 4266.698  | 179.949 | 43                          | 4428.051  | 110.346 | 43              | 4683.149  | 242.248 | 416.451                      |
| <i>Allobates</i> | <i>trilineatus</i>             | 56     | 153             | 5031.611  | 21.843  | 153                         | 5185.933  | 94.006  | 153             | 5276.842  | 30.001  | 245.231                      |
| <i>Allobates</i> | <i>zaparo</i>                  | 42     | 30              | 2883.997  | 52.412  | 30                          | 2952.900  | 67.551  | 30              | 3125.163  | 156.587 | 241.167                      |
| <i>Ameerega</i>  | <i>altamazonica</i>            | 103    | 447             | 4464.265  | 193.868 | 447                         | 4587.365  | 260.568 | 447             | 4662.892  | 184.192 | 198.627                      |

Table S1 (Cont.) Temporal, spectral, and scaling variables from calls of poison frogs including phylogeny identifier (Phy ID), locality, call behavior, habit, temperature, size, number of recordings, multinote call features, units of repetition (UR), initial pulse-note, and middle pulse-note parameters.

| Genus                 | Species                  | Phy ID | Initial Q1 (Hz) |           |         | Initial Peak Frequency (Hz) |           |         | Initial Q3 (Hz) |           |         | Initial Modulation (Q1 – Q3) |
|-----------------------|--------------------------|--------|-----------------|-----------|---------|-----------------------------|-----------|---------|-----------------|-----------|---------|------------------------------|
|                       |                          |        | N               | $\bar{X}$ | SD      | N                           | $\bar{X}$ | SD      | N               | $\bar{X}$ | SD      |                              |
| <i>Ameerega</i>       | <i>bassleri</i>          | 89     | 7               | 2610.971  | 62.560  | 7                           | 2845.957  | 64.682  | 7               | 2839.271  | 53.138  | 228.300                      |
| <i>Ameerega</i>       | <i>bilinguis</i>         | 87     | 1882            | 5145.864  | 58.950  | 1882                        | 5229.779  | 90.421  | 1882            | 5352.494  | 98.009  | 206.630                      |
| <i>Ameerega</i>       | <i>braccata</i>          | 94     | 79              | 3940.278  | 28.339  | 79                          | 3979.547  | 38.726  | 79              | 4057.486  | 29.801  | 117.208                      |
| <i>Ameerega</i>       | <i>cainarachi</i>        | 102    | 32              | 3582.584  | 44.352  | 32                          | 3654.479  | 36.523  | 32              | 3730.421  | 62.430  | 147.836                      |
| <i>Ameerega</i>       | <i>flavopicta</i>        | 95     | 59              | 3058.431  | 12.633  | 59                          | 3108.677  | 24.411  | 59              | 3127.490  | 21.046  | 69.059                       |
| <i>Ameerega</i>       | <i>hahneli</i>           | 96     | 40              | 3776.880  | 81.713  | 40                          | 3867.745  | 86.798  | 40              | 3906.103  | 44.900  | 129.223                      |
| <i>Ameerega</i>       | <i>hahneli</i>           | 97     | 1650            | 4263.090  | 231.408 | 1650                        | 4296.196  | 228.141 | 1650            | 4403.805  | 238.830 | 140.715                      |
| <i>Ameerega</i>       | <i>hahneli</i>           | 98     | 146             | 4466.799  | 32.294  | 146                         | 4535.637  | 40.499  | 146             | 4590.624  | 36.592  | 123.826                      |
| <i>Ameerega</i>       | <i>hahneli</i>           | 99     | 594             | 4452.344  | 21.871  | 594                         | 4487.172  | 18.757  | 594             | 4520.111  | 13.348  | 67.766                       |
| <i>Ameerega</i>       | <i>ignipedis</i>         | 90     | 20              | 4526.280  | 33.930  | 22                          | 4651.200  | 0.000   | 22              | 4784.264  | 73.862  | 257.984                      |
| <i>Ameerega</i>       | <i>parvula</i>           | 86     | 91              | 3867.435  | 123.869 | 91                          | 3933.753  | 97.251  | 91              | 4056.773  | 112.724 | 189.337                      |
| <i>Ameerega</i>       | <i>petersi</i>           | 101    | 21              | 3314.052  | 187.952 | 21                          | 3469.914  | 82.375  | 21              | 3547.114  | 101.713 | 233.061                      |
| <i>Ameerega</i>       | <i>picta</i>             | 91     | 46              | 4096.922  | 14.676  | 46                          | 4119.409  | 20.755  | 46              | 4213.941  | 15.652  | 117.020                      |
| <i>Ameerega</i>       | <i>picta</i>             | 92     | 1212            | 4096.159  | 80.946  | 1212                        | 4155.137  | 87.481  | 1212            | 4282.587  | 69.540  | 186.428                      |
| <i>Ameerega</i>       | <i>picta</i>             | 93     | 322             | 4558.149  | 24.310  | 322                         | 4589.328  | 24.394  | 322             | 4613.916  | 27.049  | 55.767                       |
| <i>Ameerega</i>       | <i>pongoensis</i>        | 88     | 7               | 4146.686  | 40.954  | 7                           | 4214.371  | 57.931  | 7               | 4269.743  | 76.344  | 123.057                      |
| <i>Ameerega</i>       | <i>silverstonei</i>      | 85     | 27              | 2412.859  | 26.698  | 27                          | 2438.804  | 13.883  | 27              | 2467.911  | 19.396  | 55.052                       |
| <i>Ameerega</i>       | <i>smaragdina</i>        | 100    | 47              | 3448.060  | 43.457  | 47                          | 3514.026  | 27.885  | 47              | 3592.828  | 47.311  | 144.768                      |
| <i>Ameerega</i>       | <i>trivittata</i>        | 105    | 3               | 2354.300  | 89.664  | 3                           | 2454.767  | 74.594  | 3               | 2526.567  | 124.304 | 172.267                      |
| <i>Ameerega</i>       | <i>trivittata</i>        | 107    | 6               | 2519.383  | 70.772  | 6                           | 2555.300  | 80.198  | 6               | 2598.350  | 70.313  | 78.967                       |
| <i>Ameerega</i>       | <i>trivittata</i>        | 106    | 38              | 2523.929  | 52.545  | 38                          | 2569.271  | 63.563  | 38              | 2611.208  | 50.477  | 87.279                       |
| <i>Ameerega</i>       | <i>trivittata</i>        | 104    | 4               | 2444.025  | 41.265  | 4                           | 2487.125  | 21.550  | 4               | 2584.000  | 35.191  | 139.975                      |
| <i>Anomaloglossus</i> | <i>baeobatrachus</i>     | 3      | 19              | 5313.037  | 74.884  | 19                          | 5378.758  | 73.051  | 19              | 5419.553  | 73.570  | 106.516                      |
| <i>Anomaloglossus</i> | <i>degranvillei</i>      | 4      | 32              | 4605.409  | 66.482  | 32                          | 4641.734  | 61.622  | 32              | 4668.659  | 54.533  | 63.250                       |
| <i>Anomaloglossus</i> | <i>rufulus</i>           | 5      | 2               | 3079.250  | 152.240 | 2                           | 3294.550  | 30.476  | 3               | 3258.700  | 138.433 | 179.450                      |
| <i>Anomaloglossus</i> | <i>verbeeksnyderorum</i> | 2      | 22              | 4153.950  | 80.547  | 22                          | 4189.186  | 78.837  | 22              | 4224.405  | 82.901  | 70.455                       |
| <i>Aromobates</i>     | <i>meridensis</i>        | 7      | 3               | 2655.767  | 89.608  | 3                           | 2684.467  | 108.367 | 3               | 2756.233  | 74.594  | 100.467                      |
| <i>Aromobates</i>     | <i>saltuensis</i>        | 11     | 113             | 3885.868  | 50.166  | 113                         | 3919.021  | 48.369  | 113             | 3937.042  | 46.080  | 51.174                       |
| <i>Aromobates</i>     | <i>cannatellai</i>       | 9      | 122             | 3201.034  | 33.897  | 122                         | 3219.048  | 23.873  | 122             | 3239.150  | 30.927  | 38.116                       |
| <i>Aromobates</i>     | aff. <i>saltuensis</i>   | 10     | 304             | 3450.775  | 50.430  | 304                         | 3474.021  | 63.785  | 304             | 3582.024  | 64.964  | 131.249                      |
| <i>Aromobates</i>     | <i>ericksonae</i>        | 8      | 185             | 4019.165  | 56.347  | 185                         | 4051.465  | 80.639  | 185             | 4150.508  | 89.217  | 131.343                      |
| <i>Aromobates</i>     | <i>ornatissimus</i>      | 6      | 21              | 3086.410  | 102.221 | 21                          | 3100.776  | 107.244 | 21              | 3129.505  | 106.663 | 43.095                       |
| <i>Colostethus</i>    | <i>argyrogaster</i>      | 83     | 23              | 4932.043  | 38.657  | 29                          | 5086.450  | 189.115 | 26              | 5330.296  | 87.250  | 398.253                      |
| <i>Colostethus</i>    | <i>fraterdanieli</i>     | 81     | 260             | 3438.852  | 61.791  | 260                         | 3501.936  | 67.065  | 260             | 3547.490  | 34.981  | 108.638                      |
| <i>Colostethus</i>    | <i>fraterdanieli</i>     | 82     | 430             | 4096.017  | 49.990  | 430                         | 4169.304  | 49.360  | 430             | 4185.633  | 35.432  | 89.616                       |

Table S1 (Cont.) Temporal, spectral, and scaling variables from calls of poison frogs including phylogeny identifier (Phy ID), locality, call behavior, habit, temperature, size, number of recordings, multinote call features, units of repetition (UR), initial pulse-note, and middle pulse-note parameters.

| Genus               | Species                  | Phy ID | Initial Q1 (Hz) |           |         | Initial Peak Frequency (Hz) |           |         | Initial Q3 (Hz) |           |         | Initial Modulation (Q1 – Q3) |
|---------------------|--------------------------|--------|-----------------|-----------|---------|-----------------------------|-----------|---------|-----------------|-----------|---------|------------------------------|
|                     |                          |        | N               | $\bar{X}$ | SD      | N                           | $\bar{X}$ | SD      | N               | $\bar{X}$ | SD      |                              |
| <i>Colostethus</i>  | <i>fugax</i>             | 84     | 169             | 4693.209  | 129.361 | 169                         | 4838.923  | 180.455 | 169             | 4930.967  | 149.430 | 237.758                      |
| <i>Colostethus</i>  | <i>panamansis</i>        | 76     | 40              | 3492.665  | 43.389  | 40                          | 3539.366  | 55.624  | 40              | 3636.468  | 47.220  | 143.803                      |
| <i>Colostethus</i>  | <i>panamansis</i>        | 75     | 43              | 3847.900  | 65.701  | 43                          | 3912.023  | 70.284  | 43              | 4027.719  | 45.844  | 179.819                      |
| <i>Colostethus</i>  | <i>pratti</i>            | 80     | 22              | 4153.735  | 60.049  | 22                          | 4257.705  | 104.894 | 22              | 4310.559  | 100.265 | 156.824                      |
| <i>Colostethus</i>  | <i>pratti</i>            | 79     | 9               | 4066.714  | 60.171  | 9                           | 4277.911  | 98.671  | 9               | 4359.256  | 90.782  | 292.541                      |
| <i>Colostethus</i>  | <i>pratti</i>            | 77     | 4               | 3919.050  | 60.905  | 4                           | 4134.400  | 0.000   | 4               | 4155.900  | 55.590  | 236.850                      |
| <i>Colostethus</i>  | aff. <i>pratti</i>       | 78     | 34              | 4494.103  | 47.276  | 34                          | 4838.818  | 132.194 | 34              | 4837.374  | 83.302  | 343.271                      |
| <i>Dendrobates</i>  | <i>auratus</i>           | 116    | 5               | 2816.540  | 165.653 | 10                          | 3092.160  | 387.239 | 7               | 3420.686  | 277.824 | 604.146                      |
| <i>Dendrobates</i>  | <i>bombetes</i>          | 126    | 30              | 4243.470  | 146.460 | 30                          | 4443.252  | 148.356 | 30              | 4708.586  | 125.784 | 465.116                      |
| <i>Dendrobates</i>  | <i>captivus</i>          | 125    | 71              | 5422.735  | 298.177 | 76                          | 5780.234  | 142.986 | 76              | 5867.528  | 122.094 | 444.793                      |
| <i>Dendrobates</i>  | <i>castaneoticus</i>     | 114    | 31              | 3989.890  | 109.847 | 35                          | 4247.563  | 150.298 | 33              | 4426.688  | 80.411  | 436.798                      |
| <i>Dendrobates</i>  | <i>claudiae</i>          | 130    | 4               | 5727.850  | 586.315 | 4                           | 5994.860  | 373.459 | 4               | 6201.540  | 243.616 | 473.690                      |
| <i>Dendrobates</i>  | <i>defleri</i>           | 133    | 24              | 5203.850  | 143.475 | 24                          | 5452.846  | 228.236 | 24              | 5719.220  | 263.149 | 515.370                      |
| <i>Dendrobates</i>  | <i>fantasticus</i>       | 137    | 11              | 3116.427  | 143.174 | 14                          | 3273.007  | 67.562  | 9               | 3617.567  | 227.884 | 501.139                      |
| <i>Dendrobates</i>  | <i>galactonotus</i>      | 113    | 35              | 2625.000  | 0.000   | 35                          | 2700.000  | 152.190 | 35              | 3042.857  | 121.051 | 417.857                      |
| <i>Dendrobates</i>  | <i>granuliferus</i>      | 119    | 950             | 3816.616  | 160.019 | 950                         | 3997.386  | 79.495  | 950             | 4055.255  | 54.665  | 238.639                      |
| <i>Dendrobates</i>  | <i>histrionicus</i>      | 121    | 357             | 2433.926  | 197.530 | 357                         | 2694.898  | 90.953  | 357             | 2787.035  | 75.005  | 353.109                      |
| <i>Dendrobates</i>  | <i>imitator</i>          | 131    | 61              | 5289.403  | 157.155 | 61                          | 5452.960  | 106.014 | 61              | 5621.137  | 98.993  | 331.734                      |
| <i>Dendrobates</i>  | <i>lamasi (sirensis)</i> | 132    | 7               | 4435.829  | 218.197 | 11                          | 4702.073  | 106.915 | 5               | 4849.280  | 78.218  | 413.451                      |
| <i>Dendrobates</i>  | <i>leucomelas</i>        | 118    | 110             | 2717.064  | 72.494  | 113                         | 2794.327  | 96.946  | 108             | 2893.402  | 80.779  | 176.338                      |
| <i>Dendrobates</i>  | <i>minutus</i>           | 128    | 2               | 5469.450  | 60.882  | 2                           | 5706.300  | 152.311 | 2               | 5727.850  | 121.834 | 258.400                      |
| <i>Dendrobates</i>  | <i>mysteriosus</i>       | 124    | 21              | 3082.576  | 129.137 | 21                          | 3355.832  | 88.779  | 21              | 3470.721  | 76.314  | 388.145                      |
| <i>Dendrobates</i>  | <i>pumilio</i>           | 123    | 585             | 4766.597  | 223.979 | 585                         | 5094.362  | 230.894 | 566             | 5340.523  | 148.337 | 573.926                      |
| <i>Dendrobates</i>  | <i>pumilio</i>           | 122    | 144             | 3664.719  | 185.830 | 144                         | 4014.973  | 39.788  | 144             | 4157.674  | 89.909  | 492.955                      |
| <i>Dendrobates</i>  | <i>reticulatus</i>       | 136    | 34              | 3784.753  | 107.988 | 36                          | 4225.275  | 112.647 | 55              | 4422.511  | 81.591  | 637.758                      |
| <i>Dendrobates</i>  | <i>sp. Quibdo</i>        | 129    | 33              | 5361.115  | 170.948 | 32                          | 5717.059  | 154.299 | 32              | 6002.375  | 139.141 | 641.260                      |
| <i>Dendrobates</i>  | <i>sylvaticus</i>        | 120    | 314             | 3030.001  | 143.111 | 314                         | 3388.061  | 147.440 | 314             | 3524.995  | 89.364  | 494.994                      |
| <i>Dendrobates</i>  | <i>tinctorius</i>        | 117    | 25              | 2368.668  | 54.193  | 25                          | 2911.276  | 128.603 | 25              | 3006.024  | 49.725  | 637.356                      |
| <i>Dendrobates</i>  | <i>truncatus</i>         | 115    | 17              | 3141.994  | 110.710 | 17                          | 3303.312  | 186.658 | 20              | 3510.920  | 152.766 | 368.926                      |
| <i>Dendrobates</i>  | <i>uakarii</i>           | 138    | 4               | 3585.275  | 162.584 | 4                           | 3919.025  | 126.792 | 4               | 3972.875  | 95.493  | 387.600                      |
| <i>Dendrobates</i>  | <i>variabilis</i>        | 135    | 97              | 4546.399  | 84.544  | 161                         | 4803.237  | 265.096 | 128             | 5201.612  | 131.583 | 655.213                      |
| <i>Dendrobates</i>  | <i>ventrimaculatus</i>   | 134    | 54              | 4402.341  | 196.677 | 54                          | 4637.762  | 228.030 | 54              | 4909.557  | 220.206 | 507.216                      |
| <i>Dendrobates</i>  | <i>ventrimaculatus</i>   | 139    | 148             | 3962.096  | 98.819  | 166                         | 4366.828  | 208.892 | 132             | 4554.924  | 94.565  | 592.828                      |
| <i>Dendrobates</i>  | <i>virolinensis</i>      | 127    | 127             | 4420.576  | 272.994 | 150                         | 4678.733  | 438.215 | 77              | 5132.171  | 192.273 | 711.596                      |
| <i>Epipedobates</i> | <i>anthonyi</i>          | 71     | 50              | 3972.434  | 98.648  | 50                          | 4031.008  | 99.590  | 50              | 4092.184  | 83.631  | 119.750                      |

Table S1 (Cont.) Temporal, spectral, and scaling variables from calls of poison frogs including phylogeny identifier (Phy ID), locality, call behavior, habit, temperature, size, number of recordings, multinote call features, units of repetition (UR), initial pulse-note, and middle pulse-note parameters.

| Genus               | Species                     | Phy ID | Initial Q1 (Hz) |           |         | Initial Peak Frequency (Hz) |           |         | Initial Q3 (Hz) |           |         | Initial Modulation (Q1 – Q3) |
|---------------------|-----------------------------|--------|-----------------|-----------|---------|-----------------------------|-----------|---------|-----------------|-----------|---------|------------------------------|
|                     |                             |        | N               | $\bar{X}$ | SD      | N                           | $\bar{X}$ | SD      | N               | $\bar{X}$ | SD      |                              |
| <i>Epipedobates</i> | <i>anthonyi</i>             | 70     | 106             | 3977.133  | 298.851 | 121                         | 4136.151  | 267.595 | 120             | 4224.807  | 150.994 | 247.674                      |
| <i>Epipedobates</i> | <i>boulengeri</i>           | 67     | 36              | 4895.214  | 119.615 | 36                          | 5002.032  | 111.760 | 36              | 5094.992  | 102.339 | 199.778                      |
| <i>Epipedobates</i> | <i>espinosai</i>            | 69     | 106             | 5198.021  | 378.635 | 106                         | 5400.700  | 173.682 | 106             | 5498.983  | 265.753 | 300.963                      |
| <i>Epipedobates</i> | <i>machalilla</i>           | 73     | 51              | 5730.359  | 86.309  | 51                          | 5794.156  | 83.093  | 51              | 5844.118  | 76.982  | 113.759                      |
| <i>Epipedobates</i> | <i>machalilla</i>           | 72     | 42              | 5637.595  | 108.372 | 47                          | 5700.345  | 104.124 | 55              | 5790.714  | 141.967 | 153.119                      |
| <i>Epipedobates</i> | <i>sp. F darwinwallacei</i> | 68     | 37              | 4427.692  | 286.904 | 37                          | 4550.971  | 384.338 | 37              | 4727.629  | 245.870 | 299.937                      |
| <i>Epipedobates</i> | <i>tricolor</i>             | 74     | 14              | 3826.757  | 281.077 | 14                          | 3922.107  | 220.548 | 14              | 3995.936  | 204.928 | 169.179                      |
| <i>Hyloxalus</i>    | <i>sp. Agua Azul</i>        | 142    | 12              | 6061.600  | 211.094 | 12                          | 6176.442  | 156.314 | 12              | 6294.867  | 106.807 | 233.267                      |
| <i>Hyloxalus</i>    | <i>awa</i>                  | 171    | 11              | 4435.800  | 0.000   | 11                          | 4545.455  | 22.456  | 11              | 4565.000  | 0.000   | 129.200                      |
| <i>Hyloxalus</i>    | <i>azureiventris</i>        | 165    | 10              | 3992.260  | 29.069  | 14                          | 4106.686  | 46.586  | 14              | 4291.257  | 465.255 | 298.997                      |
| <i>Hyloxalus</i>    | <i>bocagei</i>              | 151    | 43              | 4518.979  | 426.595 | 43                          | 4638.147  | 86.405  | 43              | 4760.333  | 104.370 | 241.353                      |
| <i>Hyloxalus</i>    | <i>bocagei</i>              | 150    | 40              | 4441.203  | 31.125  | 40                          | 4481.053  | 41.312  | 40              | 4593.020  | 35.918  | 151.818                      |
| <i>Hyloxalus</i>    | <i>craspedocephs</i>        | 166    | 100             | 5364.774  | 198.188 | 100                         | 5397.080  | 184.742 | 100             | 5451.350  | 193.107 | 86.576                       |
| <i>Hyloxalus</i>    | <i>aff. delatorreae</i>     | 163    | 16              | 4236.338  | 44.862  | 16                          | 4291.988  | 41.820  | 16              | 4315.431  | 57.964  | 79.094                       |
| <i>Hyloxalus</i>    | <i>delatorreae</i>          | 162    | 43              | 4183.879  | 67.935  | 43                          | 4216.574  | 68.580  | 43              | 4269.986  | 93.074  | 86.107                       |
| <i>Hyloxalus</i>    | <i>elachyhistus</i>         | 169    | 323             | 4635.855  | 22.281  | 323                         | 4759.092  | 95.560  | 323             | 4812.749  | 45.062  | 176.894                      |
| <i>Hyloxalus</i>    | <i>elachyhistus</i>         | 168    | 78              | 4500.438  | 44.854  | 78                          | 4937.115  | 124.582 | 78              | 4949.268  | 51.224  | 448.829                      |
| <i>Hyloxalus</i>    | <i>erythromos</i>           | 140    | 81              | 4132.258  | 59.330  | 81                          | 4179.041  | 65.467  | 81              | 4327.941  | 83.439  | 195.683                      |
| <i>Hyloxalus</i>    | <i>infraguttatus</i>        | 170    | 19              | 4431.300  | 62.406  | 20                          | 4500.435  | 113.088 | 17              | 4565.041  | 69.784  | 133.741                      |
| <i>Hyloxalus</i>    | <i>insulatus</i>            | 167    | 202             | 4180.850  | 41.717  | 202                         | 4268.237  | 123.148 | 202             | 4361.612  | 74.832  | 180.762                      |
| <i>Hyloxalus</i>    | <i>italoi</i>               | 144    | 30              | 3260.117  | 54.416  | 30                          | 3349.110  | 74.732  | 30              | 3402.223  | 39.175  | 142.107                      |
| <i>Hyloxalus</i>    | <i>jacobuspetersi</i>       | 152    | 92              | 2764.670  | 323.992 | 92                          | 3114.242  | 92.226  | 92              | 3718.645  | 539.012 | 953.975                      |
| <i>Hyloxalus</i>    | <i>maculosus</i>            | 149    | 55              | 3930.775  | 74.809  | 60                          | 4056.865  | 86.442  | 60              | 4120.042  | 48.023  | 189.267                      |
| <i>Hyloxalus</i>    | <i>sp. Negro</i>            | 164    | 10              | 4431.530  | 91.814  | 10                          | 4534.880  | 121.886 | 10              | 4593.742  | 123.641 | 162.212                      |
| <i>Hyloxalus</i>    | <i>nexipus</i>              | 154    | 42              | 5200.786  | 157.958 | 39                          | 5406.487  | 211.404 | 38              | 5580.495  | 181.520 | 379.709                      |
| <i>Hyloxalus</i>    | <i>aff. nexipus</i>         | 156    | 7               | 5176.357  | 168.681 | 18                          | 5378.900  | 167.615 | 18              | 5478.500  | 80.947  | 302.143                      |
| <i>Hyloxalus</i>    | <i>aff. nexipus</i>         | 155    | 43              | 5587.623  | 226.158 | 43                          | 5636.688  | 226.946 | 43              | 5682.615  | 232.822 | 94.992                       |
| <i>Hyloxalus</i>    | <i>pulchellus</i>           | 160    | 26              | 4278.465  | 20.893  | 26                          | 4350.538  | 59.828  | 26              | 4390.277  | 22.224  | 111.812                      |
| <i>Hyloxalus</i>    | <i>pulchellus</i>           | 159    | 66              | 4019.978  | 93.746  | 66                          | 4079.310  | 82.889  | 66              | 4118.055  | 97.853  | 98.076                       |
| <i>Hyloxalus</i>    | <i>aff. pulchellus</i>      | 161    | 14              | 3992.879  | 31.289  | 14                          | 4031.677  | 33.052  | 14              | 4096.688  | 27.621  | 103.809                      |
| <i>Hyloxalus</i>    | <i>cf. pulcherrimus</i>     | 153    | 80              | 4088.069  | 22.506  | 80                          | 4156.976  | 41.086  | 80              | 4204.873  | 33.754  | 116.804                      |
| <i>Hyloxalus</i>    | <i>sauli</i>                | 148    | 19              | 3445.300  | 49.729  | 19                          | 3499.695  | 77.098  | 19              | 3563.731  | 65.785  | 118.431                      |
| <i>Hyloxalus</i>    | <i>sorditatus</i>           | 141    | 9               | 2635.680  | 56.700  | 9                           | 2661.500  | 44.453  | 9               | 2691.650  | 24.884  | 55.970                       |
| <i>Hyloxalus</i>    | <i>subpunctatus</i>         | 143    | 25              | 4594.320  | 38.767  | 25                          | 4627.060  | 33.097  | 25              | 4651.172  | 32.880  | 56.852                       |
| <i>Hyloxalus</i>    | <i>toachi</i>               | 172    | 10              | 4151.610  | 146.670 | 10                          | 4194.670  | 205.230 | 9               | 4368.833  | 127.588 | 217.223                      |

Table S1 (Cont.) Temporal, spectral, and scaling variables from calls of poison frogs including phylogeny identifier (Phy ID), locality, call behavior, habit, temperature, size, number of recordings, multinote call features, units of repetition (UR), initial pulse-note, and middle pulse-note parameters.

| Genus                 | Species              | Phy ID | Initial Q1 (Hz) |           |         | Initial Peak Frequency (Hz) |           |         | Initial Q3 (Hz) |           |         | Initial Modulation (Q1 – Q3) |
|-----------------------|----------------------|--------|-----------------|-----------|---------|-----------------------------|-----------|---------|-----------------|-----------|---------|------------------------------|
|                       |                      |        | N               | $\bar{X}$ | SD      | N                           | $\bar{X}$ | SD      | N               | $\bar{X}$ | SD      |                              |
| <i>Hyloxalus</i>      | <i>vertebralis</i>   | 157    | 247             | 3795.753  | 38.955  | 247                         | 3850.872  | 38.062  | 247             | 3879.141  | 44.078  | 83.388                       |
| <i>Hyloxalus</i>      | <i>vertebralis</i>   | 158    | 126             | 4407.133  | 20.351  | 126                         | 4444.016  | 22.931  | 126             | 4476.506  | 18.331  | 69.372                       |
| <i>Hyloxalus</i>      | <i>yasuni</i>        | 147    | 110             | 3255.028  | 72.486  | 132                         | 3349.975  | 88.071  | 132             | 3365.599  | 88.052  | 110.571                      |
| <i>Hyloxalus</i>      | <i>yasuni</i>        | 145    | 45              | 3447.202  | 113.932 | 45                          | 3533.340  | 72.866  | 45              | 3647.236  | 150.547 | 200.033                      |
| <i>Hyloxalus</i>      | <i>yasuni</i>        | 146    | 55              | 3769.838  | 130.097 | 55                          | 3840.604  | 160.124 | 55              | 3937.816  | 133.841 | 167.979                      |
| <i>Mannophryne</i>    | <i>urticans</i>      | 25     | 37              | 3403.389  | 74.943  | 37                          | 3445.300  | 40.611  | 37              | 3664.573  | 108.699 | 261.184                      |
| <i>Mannophryne</i>    | <i>cordilleriana</i> | 20     | 20              | 2825.140  | 141.385 | 20                          | 2859.580  | 86.602  | 20              | 2954.345  | 170.247 | 129.205                      |
| <i>Mannophryne</i>    | <i>herminae</i>      | 19     | 424             | 4015.415  | 123.572 | 424                         | 4070.172  | 124.022 | 424             | 4126.736  | 117.510 | 111.320                      |
| <i>Mannophryne</i>    | <i>sp. Guatopo</i>   | 15     | 110             | 4142.195  | 236.549 | 110                         | 4293.456  | 248.213 | 110             | 4625.935  | 152.692 | 483.741                      |
| <i>Mannophryne</i>    | <i>leonardoi</i>     | 16     | 126             | 4066.346  | 72.349  | 126                         | 4170.945  | 82.437  | 126             | 4225.625  | 58.065  | 159.279                      |
| <i>Mannophryne</i>    | <i>olmonae</i>       | 12     | 73              | 3867.516  | 45.619  | 73                          | 3982.135  | 23.883  | 73              | 3995.427  | 27.531  | 127.910                      |
| <i>Mannophryne</i>    | <i>orellana</i>      | 22     | 70              | 3161.057  | 119.675 | 70                          | 3238.339  | 116.690 | 70              | 3281.900  | 103.786 | 120.843                      |
| <i>Mannophryne</i>    | <i>orellana</i>      | 21     | 307             | 3038.772  | 116.306 | 307                         | 3085.565  | 120.346 | 307             | 3158.459  | 117.086 | 119.687                      |
| <i>Mannophryne</i>    | <i>riveroi</i>       | 13     | 112             | 2793.139  | 133.690 | 112                         | 2858.982  | 116.233 | 112             | 2971.576  | 133.861 | 178.437                      |
| <i>Mannophryne</i>    | <i>trinitatis</i>    | 17     | 38              | 3906.658  | 114.441 | 38                          | 4150.805  | 94.331  | 38              | 4164.677  | 69.334  | 258.019                      |
| <i>Mannophryne</i>    | <i>collaris</i>      | 23     | 133             | 3058.022  | 81.351  | 133                         | 3095.341  | 94.909  | 133             | 3160.397  | 62.400  | 102.375                      |
| <i>Mannophryne</i>    | <i>collaris</i>      | 24     | 82              | 3071.359  | 67.622  | 82                          | 3133.855  | 69.443  | 82              | 3184.823  | 63.419  | 113.464                      |
| <i>Mannophryne</i>    | <i>venezuelensis</i> | 18     | 9               | 4163.089  | 113.945 | 9                           | 4282.722  | 169.708 | 9               | 4316.222  | 126.989 | 153.133                      |
| <i>Mannophryne</i>    | <i>vulcano</i>       | 14     | 46              | 4342.204  | 97.489  | 46                          | 4420.852  | 117.411 | 46              | 4462.404  | 95.696  | 120.200                      |
| <i>Mannophryne</i>    | <i>yustizi</i>       | 26     | 84              | 3560.167  | 111.353 | 84                          | 3639.867  | 124.063 | 84              | 3720.490  | 114.376 | 160.324                      |
| <i>Phyllobates</i>    | <i>aurotaenia</i>    | 108    | 31              | 3345.255  | 97.205  | 31                          | 3450.855  | 104.169 | 31              | 3539.784  | 97.851  | 194.529                      |
| <i>Phyllobates</i>    | <i>lugubris</i>      | 111    | 19              | 4270.368  | 219.249 | 19                          | 4460.763  | 139.443 | 17              | 4529.576  | 146.261 | 259.208                      |
| <i>Phyllobates</i>    | <i>lugubris</i>      | 112    | 12              | 4076.958  | 112.207 | 12                          | 4183.586  | 125.091 | 12              | 4270.859  | 107.563 | 193.901                      |
| <i>Phyllobates</i>    | <i>terribilis</i>    | 109    | 9               | 1914.044  | 57.433  | 9                           | 2009.767  | 86.150  | 9               | 2220.356  | 57.433  | 306.311                      |
| <i>Phyllobates</i>    | <i>vittatus</i>      | 110    | 104             | 3330.185  | 204.528 | 104                         | 3472.669  | 199.501 | 104             | 3558.494  | 178.088 | 228.310                      |
| <i>Rheobates</i>      | <i>palmatus</i>      | 28     | 33              | 2522.661  | 71.450  | 33                          | 2552.700  | 71.647  | 33              | 2563.142  | 71.520  | 40.482                       |
| <i>Rheobates</i>      | <i>palmatus</i>      | 27     | 45              | 2328.482  | 53.860  | 45                          | 2348.114  | 49.568  | 45              | 2364.833  | 53.386  | 36.351                       |
| <i>Silverstoneia</i>  | <i>flotator</i>      | 62     | 13              | 6175.062  | 100.282 | 14                          | 6244.629  | 140.307 | 14              | 6318.457  | 97.653  | 143.396                      |
| <i>Silverstoneia</i>  | <i>flotator</i>      | 63     | 23              | 6392.561  | 64.712  | 22                          | 6477.605  | 82.642  | 23              | 6547.987  | 65.555  | 155.426                      |
| <i>Silverstoneia</i>  | <i>nubicola</i>      | 66     | 14              | 4878.821  | 39.369  | 14                          | 4946.507  | 55.657  | 14              | 4992.621  | 35.719  | 113.800                      |
| <i>Silverstoneia</i>  | <i>nubicola</i>      | 65     | 7               | 5850.886  | 67.773  | 7                           | 6010.843  | 78.065  | 7               | 6017.000  | 59.415  | 166.114                      |
| <i>Silverstoneia</i>  | <i>nubicola</i>      | 64     | 15              | 5808.227  | 138.014 | 13                          | 5916.654  | 81.603  | 14              | 5992.386  | 84.215  | 184.159                      |
| <i>Anomaloglossus</i> | <i>stephensi</i>     | NA     | 25              | 4168.124  | 84.428  | 25                          | 4205.636  | 87.200  | 25              | 4228.140  | 86.648  | 60.016                       |
| <i>Allobates</i>      | <i>goianus</i>       | NA     | 8               | 4941.863  | 71.891  | 8                           | 5119.525  | 122.774 | 8               | 5189.488  | 32.533  | 247.625                      |
| <i>Hyloxalus</i>      | <i>anthracinus</i>   | NA     | 13              | 3735.569  | 29.567  | 13                          | 3894.238  | 86.572  | 13              | 3951.931  | 29.567  | 216.362                      |



Table S1 (Cont.) Temporal, spectral, and scaling variables from calls of poison frogs including phylogeny identifier (Phy ID), locality, call behavior, habit, temperature, size, number of recordings, multinote call features, units of repetition (UR), initial pulse-note, and middle pulse-note parameters.

| Genus            | Species                        | Phy ID | Middle Q1 (Hz) |           |         | Middle Peak Frequency (Hz) |           |         | Middle Q3 (Hz) |           |         | Middle Modulation (Q1 – Q3) |
|------------------|--------------------------------|--------|----------------|-----------|---------|----------------------------|-----------|---------|----------------|-----------|---------|-----------------------------|
|                  |                                |        | N              | $\bar{X}$ | SD      | N                          | $\bar{X}$ | SD      | N              | $\bar{X}$ | SD      |                             |
| <i>Allobates</i> | <i>algorei</i>                 | 60     | 65             | 4641.248  | 29.265  | 65                         | 4997.162  | 120.777 | 65             | 5011.373  | 29.895  | 370.125                     |
| <i>Allobates</i> | <i>brunneus</i>                | 37     | 261            | 5315.127  | 69.603  | 261                        | 5383.111  | 83.325  | 261            | 5493.356  | 60.232  | 178.230                     |
| <i>Allobates</i> | <i>caeruleodactylus</i>        | 48     | 488            | 6048.718  | 231.419 | 488                        | 6083.891  | 170.529 | 488            | 6459.993  | 298.436 | 411.275                     |
| <i>Allobates</i> | <i>crombiei</i>                | 52     | 615            | 4901.005  | 85.795  | 615                        | 4909.690  | 86.779  | 615            | 5232.960  | 98.410  | 331.955                     |
| <i>Allobates</i> | <i>femorialis</i>              | 43     | 586            | 3364.729  | 32.865  | 586                        | 3436.965  | 39.204  | 586            | 3580.058  | 54.184  | 215.329                     |
| <i>Allobates</i> | <i>femorialis</i>              | 46     | 48             | 3560.167  | 82.083  | 48                         | 3707.290  | 106.520 | 48             | 3840.054  | 79.144  | 279.888                     |
| <i>Allobates</i> | <i>femorialis</i>              | 44     | 30             | 2932.092  | 12.168  | 30                         | 2993.096  | 47.509  | 30             | 3161.775  | 50.670  | 229.683                     |
| <i>Allobates</i> | <i>femorialis</i>              | 40     | 84             | 3390.747  | 96.957  | 84                         | 3652.020  | 204.090 | 84             | 3786.519  | 98.905  | 395.773                     |
| <i>Allobates</i> | <i>femorialis</i>              | 41     | 249            | 3392.173  | 41.830  | 249                        | 3505.587  | 129.243 | 249            | 3779.783  | 59.510  | 387.610                     |
| <i>Allobates</i> | <i>femorialis</i>              | 45     | 76             | 2859.039  | 37.984  | 76                         | 3071.597  | 120.479 | 76             | 3143.845  | 56.701  | 284.806                     |
| <i>Allobates</i> | <i>granti</i>                  | 49     | 51             | 6025.082  | 73.219  | 51                         | 6150.902  | 103.604 | 51             | 6204.102  | 80.525  | 179.020                     |
| <i>Allobates</i> | <i>humilis</i>                 | 59     | 21             | 4505.581  | 21.447  | 21                         | 4542.476  | 22.006  | 21             | 4638.857  | 38.850  | 133.276                     |
| <i>Allobates</i> | <i>insperatus</i>              | 54     | 65             | 5028.851  | 23.807  | 65                         | 5338.798  | 109.859 | 65             | 5423.729  | 32.186  | 394.878                     |
| <i>Allobates</i> | <i>aff. insperatus</i>         | 55     | 43             | 5765.891  | 23.428  | 43                         | 5990.244  | 86.031  | 43             | 6061.367  | 37.698  | 295.477                     |
| <i>Allobates</i> | <i>juanii</i>                  | 47     | 64             | 4313.705  | 334.991 | 64                         | 4463.417  | 327.563 | 64             | 4582.114  | 362.831 | 268.409                     |
| <i>Allobates</i> | <i>kingsburyi</i>              | 39     | 56             | 4525.054  | 50.518  | 56                         | 4594.544  | 54.751  | 56             | 4658.225  | 52.904  | 133.172                     |
| <i>Allobates</i> | <i>marchesianus</i>            | 50     | 326            | 5678.458  | 32.493  | 326                        | 5681.402  | 189.681 | 326            | 6125.501  | 85.920  | 447.043                     |
| <i>Allobates</i> | <i>masniger</i>                | 58     | 479            | 4332.791  | 58.035  | 479                        | 4552.946  | 198.989 | 479            | 4732.441  | 50.669  | 399.651                     |
| <i>Allobates</i> | <i>nidicola</i>                | 36     | 648            | 4477.318  | 183.482 | 648                        | 4572.078  | 164.458 | 648            | 4631.220  | 147.350 | 153.902                     |
| <i>Allobates</i> | <i>olfersioides</i>            | 1      | 258            | 4892.547  | 75.777  | 258                        | 4948.065  | 75.174  | 258            | 5002.040  | 86.648  | 109.493                     |
| <i>Allobates</i> | <i>ornatus</i>                 | 51     | 60             | 5394.063  | 65.202  | 60                         | 5438.560  | 60.434  | 60             | 5566.907  | 63.838  | 172.844                     |
| <i>Allobates</i> | <i>sp. Ducke</i>               | 61     | 801            | 5978.320  | 97.634  | 801                        | 6261.783  | 121.810 | 800            | 6379.185  | 35.654  | 400.865                     |
| <i>Allobates</i> | <i>sp. Neblina</i>             | 29     | 7              | 4423.514  | 115.847 | 7                          | 4626.543  | 102.074 | 9              | 4675.100  | 43.648  | 251.586                     |
| <i>Allobates</i> | <i>sp. Negro</i>               | 38     | 985            | 4502.598  | 92.011  | 987                        | 4705.666  | 259.899 | 965            | 4953.082  | 193.538 | 450.484                     |
| <i>Allobates</i> | <i>sp. Shushufindi</i>         | 53     | 34             | 4494.109  | 29.782  | 32                         | 4849.019  | 71.611  | 32             | 4898.159  | 42.807  | 404.050                     |
| <i>Allobates</i> | <i>sp. Treviso (sp. small)</i> | 57     | 341            | 5402.860  | 99.279  | 341                        | 5568.087  | 149.643 | 341            | 5653.471  | 80.772  | 250.611                     |
| <i>Allobates</i> | <i>talamancae</i>              | 34     | 33             | 3998.648  | 45.830  | 34                         | 4126.762  | 71.498  | 34             | 4252.174  | 59.336  | 253.525                     |
| <i>Allobates</i> | <i>talamancae</i>              | 32     | 14             | 3934.414  | 46.597  | 14                         | 4214.357  | 113.134 | 13             | 4266.877  | 90.439  | 332.463                     |
| <i>Allobates</i> | <i>talamancae</i>              | 35     | 8              | 4010.550  | 35.923  | 7                          | 4183.586  | 84.052  | 8              | 4242.025  | 51.479  | 231.475                     |
| <i>Allobates</i> | <i>talamancae</i>              | 31     | 33             | 4139.582  | 87.964  | 32                         | 4297.222  | 156.127 | 30             | 4468.863  | 76.446  | 329.282                     |
| <i>Allobates</i> | <i>talamancae</i>              | 33     | 28             | 3970.986  | 110.363 | 29                         | 4137.928  | 185.346 | 31             | 4271.671  | 127.920 | 300.685                     |
| <i>Allobates</i> | <i>talamancae</i>              | 30     | 41             | 4441.700  | 212.948 | 41                         | 4650.924  | 299.867 | 40             | 4908.985  | 258.905 | 467.285                     |
| <i>Allobates</i> | <i>trilineatus</i>             | 56     | 153            | 5248.111  | 34.400  | 153                        | 5451.472  | 198.402 | 153            | 5589.050  | 38.665  | 340.939                     |
| <i>Allobates</i> | <i>zaparo</i>                  | 42     | 30             | 2934.247  | 40.374  | 30                         | 3001.707  | 99.984  | 30             | 3232.823  | 122.832 | 298.577                     |
| <i>Ameerega</i>  | <i>altamazonica</i>            | 103    | 447            | 4464.265  | 193.868 | 447                        | 4587.365  | 260.568 | 447            | 4662.892  | 184.192 | 198.627                     |

Table S1 (Cont.) Temporal, spectral, and scaling variables from calls of poison frogs including phylogeny identifier (Phy ID), locality, call behavior, habit, temperature, size, number of recordings, multinote call features, units of repetition (UR), initial pulse-note, and middle pulse-note parameters.

| Genus                 | Species                  | Phy ID | Middle Q1 (Hz) |           |         | Middle Peak Frequency (Hz) |           |         | Middle Q3 (Hz) |           |         | Middle Modulation (Q1 – Q3) |
|-----------------------|--------------------------|--------|----------------|-----------|---------|----------------------------|-----------|---------|----------------|-----------|---------|-----------------------------|
|                       |                          |        | N              | $\bar{X}$ | SD      | N                          | $\bar{X}$ | SD      | N              | $\bar{X}$ | SD      |                             |
| <i>Ameerega</i>       | <i>bassleri</i>          | 89     | 67             | 2758.211  | 17.533  | 67                         | 2894.342  | 55.532  | 67             | 2899.225  | 47.043  | 141.015                     |
| <i>Ameerega</i>       | <i>bilinguis</i>         | 87     | 1882           | 5182.090  | 75.028  | 1873                       | 5250.792  | 109.247 | 1882           | 5405.154  | 152.431 | 223.063                     |
| <i>Ameerega</i>       | <i>braccata</i>          | 94     | 79             | 3940.278  | 28.339  | 79                         | 3979.547  | 38.726  | 79             | 4057.486  | 29.801  | 117.208                     |
| <i>Ameerega</i>       | <i>cainarachi</i>        | 102    | 435            | 3622.519  | 37.897  | 435                        | 3681.961  | 80.639  | 435            | 3792.810  | 60.286  | 170.291                     |
| <i>Ameerega</i>       | <i>flavopicta</i>        | 95     | 483            | 3280.075  | 103.651 | 483                        | 3315.118  | 104.217 | 483            | 3340.765  | 100.975 | 60.691                      |
| <i>Ameerega</i>       | <i>hahneli</i>           | 96     | 40             | 3776.880  | 81.713  | 40                         | 3867.745  | 86.798  | 40             | 3906.103  | 44.900  | 129.223                     |
| <i>Ameerega</i>       | <i>hahneli</i>           | 97     | 1650           | 4263.090  | 231.408 | 1650                       | 4296.196  | 228.141 | 1650           | 4403.805  | 238.830 | 140.715                     |
| <i>Ameerega</i>       | <i>hahneli</i>           | 98     | 146            | 4466.799  | 32.294  | 146                        | 4535.637  | 40.499  | 146            | 4590.624  | 36.592  | 123.826                     |
| <i>Ameerega</i>       | <i>hahneli</i>           | 99     | 594            | 4452.344  | 21.871  | 594                        | 4487.172  | 18.757  | 594            | 4520.111  | 13.348  | 67.766                      |
| <i>Ameerega</i>       | <i>ignipedis</i>         | 90     | 20             | 4526.280  | 33.930  | 22                         | 4651.200  | 0.000   | 22             | 4784.264  | 73.862  | 257.984                     |
| <i>Ameerega</i>       | <i>parvula</i>           | 86     | 666            | 3968.309  | 44.888  | 666                        | 4003.752  | 73.824  | 666            | 4124.480  | 40.166  | 156.171                     |
| <i>Ameerega</i>       | <i>petersi</i>           | 101    | 244            | 3436.120  | 38.776  | 244                        | 3582.580  | 69.478  | 244            | 3609.195  | 37.191  | 173.075                     |
| <i>Ameerega</i>       | <i>picta</i>             | 91     | 46             | 4096.922  | 14.676  | 46                         | 4119.409  | 20.755  | 46             | 4213.941  | 15.652  | 117.020                     |
| <i>Ameerega</i>       | <i>picta</i>             | 92     | 1212           | 4096.159  | 80.946  | 1212                       | 4155.137  | 87.481  | 1212           | 4282.587  | 69.540  | 186.428                     |
| <i>Ameerega</i>       | <i>picta</i>             | 93     | 322            | 4558.149  | 24.310  | 322                        | 4589.328  | 24.394  | 322            | 4613.916  | 27.049  | 55.767                      |
| <i>Ameerega</i>       | <i>pongoensis</i>        | 88     | 7              | 4146.686  | 40.954  | 7                          | 4214.371  | 57.931  | 7              | 4269.743  | 76.344  | 123.057                     |
| <i>Ameerega</i>       | <i>silverstonei</i>      | 85     | 160            | 2413.970  | 29.342  | 172                        | 2436.337  | 29.667  | 172            | 2472.554  | 31.139  | 58.584                      |
| <i>Ameerega</i>       | <i>smaragdina</i>        | 100    | 47             | 3515.860  | 32.887  | 47                         | 3566.234  | 89.631  | 47             | 3685.377  | 69.978  | 169.517                     |
| <i>Ameerega</i>       | <i>trivittata</i>        | 105    | 92             | 2389.748  | 55.841  | 92                         | 2447.784  | 57.555  | 92             | 2496.930  | 56.017  | 107.183                     |
| <i>Ameerega</i>       | <i>trivittata</i>        | 107    | 109            | 2589.931  | 25.879  | 109                        | 2653.135  | 29.875  | 109            | 2679.601  | 27.084  | 89.670                      |
| <i>Ameerega</i>       | <i>trivittata</i>        | 106    | 514            | 2581.322  | 38.519  | 514                        | 2623.134  | 39.550  | 514            | 2678.168  | 37.065  | 96.846                      |
| <i>Ameerega</i>       | <i>trivittata</i>        | 104    | 69             | 2451.678  | 23.725  | 69                         | 2510.358  | 24.584  | 69             | 2560.197  | 28.347  | 108.519                     |
| <i>Anomaloglossus</i> | <i>baeobatrachus</i>     | 3      | 255            | 5459.300  | 51.401  | 255                        | 5507.940  | 56.177  | 255            | 5543.401  | 55.618  | 84.101                      |
| <i>Anomaloglossus</i> | <i>degranvillei</i>      | 4      | 32             | 4605.409  | 66.482  | 32                         | 4641.734  | 61.622  | 32             | 4668.659  | 54.533  | 63.250                      |
| <i>Anomaloglossus</i> | <i>rufulus</i>           | 5      | 12             | 3265.833  | 60.452  | 13                         | 3326.054  | 43.631  | 18             | 3347.222  | 28.828  | 81.389                      |
| <i>Anomaloglossus</i> | <i>verbeeksnyderorum</i> | 2      | 1476           | 4298.840  | 44.968  | 1476                       | 4331.791  | 47.481  | 1476           | 4354.319  | 40.983  | 55.478                      |
| <i>Aromobates</i>     | <i>meridensis</i>        | 7      | 17             | 2801.835  | 18.479  | 17                         | 2834.794  | 16.936  | 17             | 2842.394  | 15.220  | 40.559                      |
| <i>Aromobates</i>     | <i>saltuensis</i>        | 11     | 112            | 3929.410  | 34.798  | 112                        | 3950.565  | 35.161  | 112            | 3970.723  | 36.359  | 41.313                      |
| <i>Aromobates</i>     | <i>cannatellai</i>       | 9      | 122            | 3201.034  | 33.897  | 122                        | 3219.048  | 23.873  | 122            | 3239.150  | 30.927  | 38.116                      |
| <i>Aromobates</i>     | aff. <i>saltuensis</i>   | 10     | 304            | 3450.775  | 50.430  | 304                        | 3474.021  | 63.785  | 304            | 3582.024  | 64.964  | 131.249                     |
| <i>Aromobates</i>     | <i>ericksonae</i>        | 8      | 185            | 4220.493  | 99.450  | 185                        | 4307.718  | 97.765  | 185            | 4354.000  | 102.659 | 133.508                     |
| <i>Aromobates</i>     | <i>ornatissimus</i>      | 6      | 21             | 3086.410  | 102.221 | 21                         | 3100.776  | 107.244 | 21             | 3129.505  | 106.663 | 43.095                      |
| <i>Colostethus</i>    | <i>argyrogaster</i>      | 83     | 23             | 4932.043  | 38.657  | 29                         | 5086.450  | 189.115 | 26             | 5330.296  | 87.250  | 398.253                     |
| <i>Colostethus</i>    | <i>fraterdanieli</i>     | 81     | 260            | 3438.852  | 61.791  | 260                        | 3501.936  | 67.065  | 260            | 3547.490  | 34.981  | 108.638                     |
| <i>Colostethus</i>    | <i>fraterdanieli</i>     | 82     | 430            | 4096.017  | 49.990  | 430                        | 4169.304  | 49.360  | 430            | 4185.633  | 35.432  | 89.616                      |

Table S1 (Cont.) Temporal, spectral, and scaling variables from calls of poison frogs including phylogeny identifier (Phy ID), locality, call behavior, habit, temperature, size, number of recordings, multinote call features, units of repetition (UR), initial pulse-note, and middle pulse-note parameters.

| Genus               | Species                  | Phy ID | Middle Q1 (Hz) |           |         | Middle Peak Frequency (Hz) |           |         | Middle Q3 (Hz) |           |         | Middle Modulation (Q1 – Q3) |
|---------------------|--------------------------|--------|----------------|-----------|---------|----------------------------|-----------|---------|----------------|-----------|---------|-----------------------------|
|                     |                          |        | N              | $\bar{X}$ | SD      | N                          | $\bar{X}$ | SD      | N              | $\bar{X}$ | SD      |                             |
| <i>Colostethus</i>  | <i>fugax</i>             | 84     | 169            | 4693.209  | 129.361 | 169                        | 4838.923  | 180.455 | 169            | 4930.967  | 149.430 | 237.758                     |
| <i>Colostethus</i>  | <i>panamansis</i>        | 76     | 66             | 3813.980  | 55.075  | 66                         | 3851.182  | 62.314  | 66             | 3965.581  | 48.901  | 151.600                     |
| <i>Colostethus</i>  | <i>panamansis</i>        | 75     | 55             | 4144.545  | 112.417 | 55                         | 4282.531  | 158.802 | 55             | 4399.652  | 113.236 | 255.107                     |
| <i>Colostethus</i>  | <i>pratti</i>            | 80     | 60             | 4168.406  | 59.460  | 60                         | 4247.579  | 68.089  | 60             | 4318.843  | 62.987  | 150.437                     |
| <i>Colostethus</i>  | <i>pratti</i>            | 79     | 127            | 4079.091  | 75.941  | 127                        | 4260.115  | 95.773  | 127            | 4318.161  | 92.787  | 239.071                     |
| <i>Colostethus</i>  | <i>pratti</i>            | 77     | 19             | 3907.700  | 42.665  | 19                         | 4134.373  | 74.577  | 19             | 4138.905  | 47.383  | 231.205                     |
| <i>Colostethus</i>  | aff. <i>pratti</i>       | 78     | 164            | 4544.124  | 49.510  | 164                        | 4734.930  | 145.166 | 164            | 4806.054  | 81.793  | 261.930                     |
| <i>Dendrobates</i>  | <i>auratus</i>           | 116    | 251            | 2828.639  | 164.654 | 251                        | 3016.355  | 147.481 | 251            | 3167.508  | 106.061 | 338.869                     |
| <i>Dendrobates</i>  | <i>bombetes</i>          | 126    | 2533           | 4604.525  | 126.822 | 2533                       | 4797.654  | 156.330 | 2533           | 4980.304  | 135.054 | 375.779                     |
| <i>Dendrobates</i>  | <i>captivus</i>          | 125    | 165            | 5395.558  | 144.868 | 275                        | 5492.067  | 370.632 | 275            | 5665.707  | 132.527 | 270.150                     |
| <i>Dendrobates</i>  | <i>castaneoticus</i>     | 114    | 621            | 3991.788  | 78.460  | 649                        | 4198.731  | 127.150 | 629            | 4442.467  | 129.509 | 450.679                     |
| <i>Dendrobates</i>  | <i>claudiae</i>          | 130    | 144            | 6365.431  | 51.244  | 144                        | 6492.256  | 80.142  | 144            | 6562.851  | 82.316  | 197.420                     |
| <i>Dendrobates</i>  | <i>defleri</i>           | 133    | 210            | 5314.793  | 157.368 | 210                        | 5479.661  | 267.084 | 210            | 5835.496  | 343.205 | 520.703                     |
| <i>Dendrobates</i>  | <i>fantasticus</i>       | 137    | 210            | 2775.071  | 65.800  | 212                        | 3051.986  | 237.488 | 265            | 3280.814  | 92.092  | 505.743                     |
| <i>Dendrobates</i>  | <i>galactonotus</i>      | 113    | 600            | 2624.375  | 15.309  | 600                        | 2998.125  | 40.495  | 593            | 3197.934  | 187.367 | 573.559                     |
| <i>Dendrobates</i>  | <i>granuliferus</i>      | 119    | 1432           | 3914.521  | 75.804  | 1432                       | 4035.620  | 54.479  | 1432           | 4140.841  | 106.364 | 226.320                     |
| <i>Dendrobates</i>  | <i>histrionicus</i>      | 121    | 498            | 2618.225  | 95.659  | 498                        | 2746.211  | 112.731 | 498            | 2887.639  | 87.936  | 269.413                     |
| <i>Dendrobates</i>  | <i>imitator</i>          | 131    | 521            | 5483.071  | 50.284  | 521                        | 5588.986  | 64.703  | 521            | 5715.077  | 54.339  | 232.005                     |
| <i>Dendrobates</i>  | <i>lamasi (sirensis)</i> | 132    | 95             | 4624.417  | 305.511 | 95                         | 4766.025  | 181.015 | 95             | 4927.427  | 209.119 | 303.010                     |
| <i>Dendrobates</i>  | <i>leucomelas</i>        | 118    | 2566           | 2765.340  | 78.950  | 2566                       | 2845.173  | 105.226 | 2555           | 2936.457  | 83.411  | 171.117                     |
| <i>Dendrobates</i>  | <i>minutus</i>           | 128    | 84             | 5849.856  | 165.496 | 84                         | 6001.712  | 104.743 | 84             | 6101.889  | 59.359  | 252.033                     |
| <i>Dendrobates</i>  | <i>mysteriosus</i>       | 124    | 284            | 3244.436  | 145.481 | 284                        | 3422.378  | 95.124  | 284            | 3505.307  | 74.863  | 260.872                     |
| <i>Dendrobates</i>  | <i>pumilio</i>           | 123    | 1154           | 4980.476  | 140.881 | 1154                       | 5199.322  | 133.036 | 1152           | 5346.048  | 98.410  | 365.571                     |
| <i>Dendrobates</i>  | <i>pumilio</i>           | 122    | 333            | 3825.317  | 147.056 | 333                        | 4046.674  | 61.077  | 333            | 4123.464  | 42.925  | 298.147                     |
| <i>Dendrobates</i>  | <i>reticulatus</i>       | 136    | 332            | 3798.643  | 142.380 | 303                        | 4180.989  | 142.884 | 417            | 4411.965  | 101.741 | 613.322                     |
| <i>Dendrobates</i>  | <i>sp. Quibdo</i>        | 129    | 925            | 5306.147  | 232.478 | 946                        | 5752.313  | 493.830 | 526            | 6102.650  | 194.117 | 796.503                     |
| <i>Dendrobates</i>  | <i>sylvaticus</i>        | 120    | 377            | 3139.604  | 188.418 | 377                        | 3529.852  | 153.655 | 377            | 3617.584  | 97.599  | 477.980                     |
| <i>Dendrobates</i>  | <i>tinctorius</i>        | 117    | 337            | 2415.695  | 48.271  | 337                        | 2948.690  | 118.545 | 337            | 3099.493  | 36.521  | 683.798                     |
| <i>Dendrobates</i>  | <i>truncatus</i>         | 115    | 306            | 2986.523  | 89.742  | 396                        | 3330.668  | 391.737 | 395            | 3445.709  | 356.923 | 459.186                     |
| <i>Dendrobates</i>  | <i>uakarii</i>           | 138    | 26             | 3642.415  | 87.133  | 26                         | 3808.058  | 137.906 | 26             | 3955.477  | 79.596  | 313.062                     |
| <i>Dendrobates</i>  | <i>variabilis</i>        | 135    | 1166           | 4875.886  | 218.541 | 1166                       | 5304.276  | 240.126 | 1166           | 5524.679  | 140.261 | 648.792                     |
| <i>Dendrobates</i>  | <i>ventrimaculatus</i>   | 134    | 514            | 4488.031  | 141.575 | 514                        | 4873.980  | 253.227 | 514            | 5101.842  | 157.272 | 613.812                     |
| <i>Dendrobates</i>  | <i>ventrimaculatus</i>   | 139    | 607            | 4231.428  | 55.844  | 789                        | 4605.266  | 290.596 | 801            | 4885.320  | 141.379 | 653.892                     |
| <i>Dendrobates</i>  | <i>virolinensis</i>      | 127    | 2201           | 4836.812  | 250.008 | 2197                       | 5167.903  | 169.537 | 2170           | 5583.146  | 311.786 | 746.334                     |
| <i>Epipedobates</i> | <i>anthonyi</i>          | 71     | 435            | 4068.911  | 26.373  | 435                        | 4117.247  | 35.100  | 435            | 4156.843  | 27.599  | 87.933                      |

Table S1 (Cont.) Temporal, spectral, and scaling variables from calls of poison frogs including phylogeny identifier (Phy ID), locality, call behavior, habit, temperature, size, number of recordings, multinote call features, units of repetition (UR), initial pulse-note, and middle pulse-note parameters.

| Genus               | Species                     | Phy ID | Middle Q1 (Hz) |           |         | Middle Peak Frequency (Hz) |           |         | Middle Q3 (Hz) |           |         | Middle Modulation (Q1 – Q3) |
|---------------------|-----------------------------|--------|----------------|-----------|---------|----------------------------|-----------|---------|----------------|-----------|---------|-----------------------------|
|                     |                             |        | N              | $\bar{X}$ | SD      | N                          | $\bar{X}$ | SD      | N              | $\bar{X}$ | SD      |                             |
| <i>Epipedobates</i> | <i>anthonyi</i>             | 70     | 1084           | 4262.018  | 125.737 | 1084                       | 4336.539  | 80.830  | 1084           | 4388.570  | 70.320  | 126.552                     |
| <i>Epipedobates</i> | <i>boulengeri</i>           | 67     | 259            | 5283.033  | 103.604 | 259                        | 5370.164  | 103.175 | 259            | 5464.852  | 117.777 | 181.820                     |
| <i>Epipedobates</i> | <i>espinosai</i>            | 69     | 728            | 5443.813  | 106.003 | 728                        | 5544.236  | 114.928 | 728            | 5636.183  | 131.335 | 192.370                     |
| <i>Epipedobates</i> | <i>machalilla</i>           | 73     | 263            | 5802.832  | 64.535  | 263                        | 5854.401  | 64.698  | 263            | 5892.108  | 61.484  | 89.276                      |
| <i>Epipedobates</i> | <i>machalilla</i>           | 72     | 96             | 6013.896  | 54.743  | 96                         | 6074.160  | 45.015  | 96             | 6121.647  | 48.544  | 107.752                     |
| <i>Epipedobates</i> | <i>sp. F darwinwallacei</i> | 68     | 1339           | 4815.959  | 134.959 | 1339                       | 4904.644  | 130.117 | 1339           | 4978.535  | 145.158 | 162.575                     |
| <i>Epipedobates</i> | <i>tricolor</i>             | 74     | 812            | 4515.281  | 101.267 | 812                        | 4592.719  | 101.538 | 812            | 4646.229  | 105.280 | 130.948                     |
| <i>Hyloxalus</i>    | <i>sp. Agua Azul</i>        | 142    | 144            | 6153.115  | 118.890 | 144                        | 6423.484  | 183.732 | 144            | 6488.977  | 106.695 | 335.863                     |
| <i>Hyloxalus</i>    | <i>awa</i>                  | 171    | 122            | 4454.877  | 22.199  | 122                        | 4545.252  | 29.354  | 122            | 4642.339  | 50.730  | 187.462                     |
| <i>Hyloxalus</i>    | <i>azureiventris</i>        | 165    | 398            | 3994.580  | 63.675  | 398                        | 4042.489  | 33.749  | 398            | 4087.187  | 31.811  | 92.607                      |
| <i>Hyloxalus</i>    | <i>bocagei</i>              | 151    | 592            | 4652.058  | 82.129  | 592                        | 4692.425  | 59.565  | 592            | 4792.021  | 76.285  | 139.963                     |
| <i>Hyloxalus</i>    | <i>bocagei</i>              | 150    | 716            | 4444.423  | 19.996  | 716                        | 4478.900  | 9.760   | 716            | 4565.008  | 16.886  | 120.585                     |
| <i>Hyloxalus</i>    | <i>craspedocephs</i>        | 166    | 167            | 5902.161  | 114.509 | 167                        | 5942.650  | 127.803 | 167            | 6002.993  | 129.359 | 100.832                     |
| <i>Hyloxalus</i>    | <i>aff. delatorreae</i>     | 163    | 101            | 4367.250  | 94.231  | 101                        | 4454.514  | 93.165  | 101            | 4514.864  | 72.314  | 147.615                     |
| <i>Hyloxalus</i>    | <i>delatorreae</i>          | 162    | 246            | 4339.933  | 111.553 | 246                        | 4409.100  | 111.578 | 246            | 4478.088  | 95.619  | 138.154                     |
| <i>Hyloxalus</i>    | <i>elachyhistus</i>         | 169    | 323            | 4635.855  | 22.281  | 323                        | 4759.092  | 95.560  | 323            | 4812.749  | 45.062  | 176.894                     |
| <i>Hyloxalus</i>    | <i>elachyhistus</i>         | 168    | 78             | 4500.438  | 44.854  | 78                         | 4937.115  | 124.582 | 78             | 4949.268  | 51.224  | 448.829                     |
| <i>Hyloxalus</i>    | <i>erythromos</i>           | 140    | 433            | 4198.775  | 79.881  | 433                        | 4300.905  | 113.928 | 433            | 4399.661  | 87.045  | 200.886                     |
| <i>Hyloxalus</i>    | <i>infraguttatus</i>        | 170    | 944            | 4499.468  | 56.510  | 944                        | 4566.040  | 87.005  | 944            | 4684.796  | 64.508  | 185.328                     |
| <i>Hyloxalus</i>    | <i>insulatus</i>            | 167    | 202            | 4180.850  | 41.717  | 202                        | 4268.237  | 123.148 | 202            | 4361.612  | 74.832  | 180.762                     |
| <i>Hyloxalus</i>    | <i>italoi</i>               | 144    | 844            | 3496.732  | 44.247  | 844                        | 3592.107  | 112.183 | 844            | 3684.211  | 49.759  | 187.479                     |
| <i>Hyloxalus</i>    | <i>jacobuspetersi</i>       | 152    | 92             | 2764.670  | 323.992 | 92                         | 3114.242  | 92.226  | 92             | 3718.645  | 539.012 | 953.975                     |
| <i>Hyloxalus</i>    | <i>maculosus</i>            | 149    | 57             | 3962.100  | 0.000   | 60                         | 4125.785  | 37.869  | 60             | 4131.528  | 22.244  | 169.428                     |
| <i>Hyloxalus</i>    | <i>sp. Negro</i>            | 164    | 110            | 4680.918  | 86.674  | 119                        | 4820.538  | 199.239 | 112            | 5021.079  | 122.431 | 340.161                     |
| <i>Hyloxalus</i>    | <i>nexipus</i>              | 154    | 797            | 5521.353  | 184.296 | 797                        | 5630.070  | 210.159 | 797            | 5746.800  | 168.719 | 225.448                     |
| <i>Hyloxalus</i>    | <i>aff. nexipus</i>         | 156    | 151            | 5422.543  | 41.580  | 151                        | 5510.287  | 67.579  | 151            | 5563.140  | 53.640  | 140.598                     |
| <i>Hyloxalus</i>    | <i>aff. nexipus</i>         | 155    | 373            | 5786.263  | 61.302  | 373                        | 5867.199  | 85.350  | 373            | 5938.427  | 78.073  | 152.165                     |
| <i>Hyloxalus</i>    | <i>pulchellus</i>           | 160    | 38             | 4280.284  | 23.429  | 38                         | 4349.129  | 49.047  | 38             | 4390.218  | 20.553  | 109.934                     |
| <i>Hyloxalus</i>    | <i>pulchellus</i>           | 159    | 110            | 4050.379  | 99.592  | 110                        | 4089.737  | 107.550 | 110            | 4119.489  | 93.820  | 69.110                      |
| <i>Hyloxalus</i>    | <i>aff. pulchellus</i>      | 161    | 51             | 4081.161  | 49.920  | 51                         | 4118.926  | 69.188  | 51             | 4181.976  | 51.823  | 100.816                     |
| <i>Hyloxalus</i>    | <i>cf. pulcherrimus</i>     | 153    | 80             | 4088.069  | 22.506  | 80                         | 4156.976  | 41.086  | 80             | 4204.873  | 33.754  | 116.804                     |
| <i>Hyloxalus</i>    | <i>sauli</i>                | 148    | 1848           | 3411.568  | 40.355  | 1848                       | 3438.705  | 45.720  | 1848           | 3496.546  | 63.730  | 84.978                      |
| <i>Hyloxalus</i>    | <i>sorditatus</i>           | 141    | 264            | 2690.255  | 34.709  | 264                        | 2708.121  | 35.151  | 264            | 2746.207  | 40.298  | 55.952                      |
| <i>Hyloxalus</i>    | <i>subpunctatus</i>         | 143    | 25             | 4594.320  | 38.767  | 25                         | 4627.060  | 33.097  | 25             | 4651.172  | 32.880  | 56.852                      |
| <i>Hyloxalus</i>    | <i>toachi</i>               | 172    | 178            | 4369.313  | 53.603  | 179                        | 4469.283  | 114.454 | 178            | 4662.297  | 89.126  | 292.984                     |

Table S1 (Cont.) Temporal, spectral, and scaling variables from calls of poison frogs including phylogeny identifier (Phy ID), locality, call behavior, habit, temperature, size, number of recordings, multinote call features, units of repetition (UR), initial pulse-note, and middle pulse-note parameters.

| Genus                 | Species              | Phy ID | Middle Q1 (Hz) |           |         | Middle Peak Frequency (Hz) |           |         | Middle Q3 (Hz) |           |         | Middle Modulation (Q1 – Q3) |
|-----------------------|----------------------|--------|----------------|-----------|---------|----------------------------|-----------|---------|----------------|-----------|---------|-----------------------------|
|                       |                      |        | N              | $\bar{X}$ | SD      | N                          | $\bar{X}$ | SD      | N              | $\bar{X}$ | SD      |                             |
| <i>Hyloxalus</i>      | <i>vertebralis</i>   | 157    | 247            | 3795.753  | 38.955  | 247                        | 3850.872  | 38.062  | 247            | 3879.141  | 44.078  | 83.388                      |
| <i>Hyloxalus</i>      | <i>vertebralis</i>   | 158    | 126            | 4407.133  | 20.351  | 126                        | 4444.016  | 22.931  | 126            | 4476.506  | 18.331  | 69.372                      |
| <i>Hyloxalus</i>      | <i>yasuni</i>        | 147    | 1090           | 3373.508  | 74.261  | 1090                       | 3462.933  | 87.006  | 1090           | 3525.999  | 92.037  | 152.491                     |
| <i>Hyloxalus</i>      | <i>yasuni</i>        | 145    | 617            | 3643.605  | 45.357  | 617                        | 3673.834  | 96.473  | 617            | 3882.597  | 54.108  | 238.992                     |
| <i>Hyloxalus</i>      | <i>yasuni</i>        | 146    | 792            | 3877.158  | 82.191  | 792                        | 3957.735  | 82.861  | 792            | 4028.368  | 33.017  | 151.210                     |
| <i>Mannophryne</i>    | <i>urticans</i>      | 25     | 363            | 3444.825  | 15.678  | 363                        | 3447.199  | 18.012  | 363            | 3610.954  | 47.451  | 166.129                     |
| <i>Mannophryne</i>    | <i>cordilleriana</i> | 20     | 550            | 2888.089  | 77.381  | 550                        | 2892.094  | 74.876  | 550            | 3049.737  | 102.606 | 161.648                     |
| <i>Mannophryne</i>    | <i>herminae</i>      | 19     | 418            | 4126.333  | 136.926 | 418                        | 4167.648  | 138.761 | 418            | 4231.693  | 129.908 | 105.360                     |
| <i>Mannophryne</i>    | <i>sp. Guatopo</i>   | 15     | 111            | 4445.156  | 155.986 | 111                        | 4548.350  | 169.518 | 111            | 4625.935  | 152.692 | 180.779                     |
| <i>Mannophryne</i>    | <i>leonardoi</i>     | 16     | 402            | 4357.950  | 96.382  | 402                        | 4411.628  | 77.153  | 402            | 4493.363  | 75.721  | 135.413                     |
| <i>Mannophryne</i>    | <i>olmonae</i>       | 12     | 73             | 3867.516  | 45.619  | 73                         | 3982.135  | 23.883  | 73             | 3995.427  | 27.531  | 127.910                     |
| <i>Mannophryne</i>    | <i>orellana</i>      | 22     | 194            | 3335.854  | 60.763  | 194                        | 3383.348  | 55.259  | 194            | 3421.778  | 61.073  | 85.924                      |
| <i>Mannophryne</i>    | <i>orellana</i>      | 21     | 1548           | 3159.761  | 56.064  | 1548                       | 3238.836  | 52.603  | 1548           | 3275.214  | 47.362  | 115.453                     |
| <i>Mannophryne</i>    | <i>riveroi</i>       | 13     | 280            | 2931.577  | 30.792  | 280                        | 3004.189  | 85.666  | 280            | 3108.795  | 36.298  | 177.218                     |
| <i>Mannophryne</i>    | <i>trinitatis</i>    | 17     | 40             | 4217.605  | 32.680  | 40                         | 4325.398  | 31.840  | 40             | 4342.436  | 30.024  | 124.831                     |
| <i>Mannophryne</i>    | <i>collaris</i>      | 23     | 680            | 3205.524  | 47.297  | 680                        | 3244.723  | 47.351  | 680            | 3288.231  | 43.956  | 82.707                      |
| <i>Mannophryne</i>    | <i>collaris</i>      | 24     | 536            | 3293.676  | 40.100  | 536                        | 3348.129  | 42.568  | 536            | 3380.171  | 41.708  | 86.495                      |
| <i>Mannophryne</i>    | <i>venezuelensis</i> | 18     | 196            | 4323.331  | 45.593  | 196                        | 4378.279  | 51.037  | 196            | 4499.789  | 42.628  | 176.458                     |
| <i>Mannophryne</i>    | <i>vulcano</i>       | 14     | 47             | 4551.281  | 58.957  | 47                         | 4598.938  | 49.959  | 47             | 4649.328  | 58.158  | 98.047                      |
| <i>Mannophryne</i>    | <i>yustizi</i>       | 26     | 730            | 3671.619  | 79.955  | 730                        | 3785.554  | 26.723  | 730            | 3809.863  | 59.555  | 138.244                     |
| <i>Phyllobates</i>    | <i>aurotaenia</i>    | 108    | 591            | 3555.202  | 118.362 | 591                        | 3676.726  | 142.403 | 591            | 3769.999  | 111.712 | 214.797                     |
| <i>Phyllobates</i>    | <i>lugubris</i>      | 111    | 619            | 4378.978  | 104.363 | 619                        | 4467.766  | 145.618 | 619            | 4513.694  | 139.956 | 134.716                     |
| <i>Phyllobates</i>    | <i>lugubris</i>      | 112    | 525            | 4143.235  | 116.962 | 525                        | 4221.648  | 86.174  | 525            | 4270.859  | 107.563 | 127.624                     |
| <i>Phyllobates</i>    | <i>terribilis</i>    | 109    | 342            | 2032.438  | 72.921  | 342                        | 2109.010  | 132.222 | 342            | 2264.673  | 73.842  | 232.235                     |
| <i>Phyllobates</i>    | <i>vittatus</i>      | 110    | 3681           | 3481.292  | 198.503 | 3681                       | 3577.207  | 181.084 | 3681           | 3666.988  | 183.377 | 185.696                     |
| <i>Rheobates</i>      | <i>palmatus</i>      | 28     | 319            | 2559.184  | 67.621  | 319                        | 2571.746  | 65.295  | 319            | 2600.862  | 69.230  | 41.678                      |
| <i>Rheobates</i>      | <i>palmatus</i>      | 27     | 1149           | 2368.931  | 34.679  | 1149                       | 2393.542  | 26.708  | 1149           | 2408.017  | 33.676  | 39.087                      |
| <i>Silverstoneia</i>  | <i>flotator</i>      | 62     | 593            | 6276.391  | 103.638 | 593                        | 6437.077  | 37.038  | 593            | 6456.200  | 38.266  | 179.809                     |
| <i>Silverstoneia</i>  | <i>flotator</i>      | 63     | 382            | 6425.063  | 50.138  | 382                        | 6500.719  | 74.769  | 382            | 6616.703  | 49.541  | 191.640                     |
| <i>Silverstoneia</i>  | <i>nubicola</i>      | 66     | 121            | 4984.666  | 39.533  | 121                        | 5043.393  | 57.185  | 121            | 5116.350  | 36.735  | 131.684                     |
| <i>Silverstoneia</i>  | <i>nubicola</i>      | 65     | 123            | 5922.860  | 68.276  | 123                        | 6094.430  | 67.838  | 123            | 6099.682  | 51.802  | 176.822                     |
| <i>Silverstoneia</i>  | <i>nubicola</i>      | 64     | 199            | 5903.777  | 73.682  | 199                        | 5968.706  | 82.354  | 199            | 6100.499  | 92.888  | 196.722                     |
| <i>Anomaloglossus</i> | <i>stepheni</i>      | NA     | 150            | 4226.883  | 85.654  | 150                        | 4265.012  | 81.816  | 150            | 4290.629  | 84.408  | 63.745                      |
| <i>Allobates</i>      | <i>goianus</i>       | NA     | 8              | 4941.863  | 71.891  | 8                          | 5119.525  | 122.774 | 8              | 5189.488  | 32.533  | 247.625                     |
| <i>Hyloxalus</i>      | <i>anthracinus</i>   | NA     | 13             | 3735.569  | 29.567  | 13                         | 3894.238  | 86.572  | 13             | 3951.931  | 29.567  | 216.362                     |

Table S1 (Cont.) Sequences for the species used in the comparative analyses. Gene accession numbers from published sequences. Please review the references for the voucher information.

| Genus                 | Species                        | Phy ID | 12S-16S  | Ref | Voucher    | Locality                                               | Latitude | Longitude |
|-----------------------|--------------------------------|--------|----------|-----|------------|--------------------------------------------------------|----------|-----------|
| <i>Adenomera</i>      | <i>andreae</i>                 | NA     | HQ290944 | (1) | --         | --                                                     | --       | --        |
| <i>Bufo</i>           | <i>nebulifer</i>               | NA     | HQ290945 | (1) | --         | --                                                     | --       | --        |
| <i>Centrolene</i>     | <i>grandisonae</i>             | NA     | HQ290946 | (1) | --         | --                                                     | --       | --        |
| <i>Ceratophrys</i>    | <i>cornuta</i>                 | NA     | HQ290947 | (1) | --         | --                                                     | --       | --        |
| <i>Crossodactylus</i> | <i>schmidti</i>                | NA     | HQ290948 | (1) | --         | --                                                     | --       | --        |
| <i>Lithodytes</i>     | <i>lineatus</i>                | NA     | HQ290949 | (1) | --         | --                                                     | --       | --        |
| <i>Allobates</i>      | <i>algorei</i>                 | 60     | HQ290950 | (1) | --         | --                                                     | --       | --        |
| <i>Allobates</i>      | <i>brunneus</i>                | 37     | EU342522 | (2) | --         | --                                                     | --       | --        |
| <i>Allobates</i>      | <i>caeruleodactylus</i>        | 48     | EU342542 | (2) | --         | --                                                     | --       | --        |
| <i>Allobates</i>      | <i>crombiei</i>                | 52     | EU342552 | (2) | --         | --                                                     | --       | --        |
| <i>Allobates</i>      | <i>femorialis</i>              | 43     | HQ290951 | (1) | --         | --                                                     | --       | --        |
| <i>Allobates</i>      | <i>femorialis</i>              | 46     | EU342537 | (2) | --         | --                                                     | --       | --        |
| <i>Allobates</i>      | <i>femorialis</i>              | 44     | EU342536 | (2) | --         | --                                                     | --       | --        |
| <i>Allobates</i>      | <i>femorialis</i>              | 40     | AY326026 | (2) | --         | --                                                     | --       | --        |
| <i>Allobates</i>      | <i>femorialis</i>              | 41     | EU342532 | (2) | --         | --                                                     | --       | --        |
| <i>Allobates</i>      | <i>femorialis</i>              | 45     | DQ502246 | (3) | --         | --                                                     | --       | --        |
| <i>Allobates</i>      | <i>granti</i>                  | 49     | EU342547 | (2) | --         | --                                                     | --       | --        |
| <i>Allobates</i>      | <i>humilis</i>                 | 59     | KJ940454 | --  | CVULA 5690 | Venezuela: Barinas: On the road to San Ramón, Calderas | 8.8678   | -70.4861  |
| <i>Allobates</i>      | <i>insperatus</i>              | 54     | HQ290959 | (1) | --         | --                                                     | --       | --        |
| <i>Allobates</i>      | <i>aff. insperatus</i>         | 55     | EU342553 | (2) | --         | --                                                     | --       | --        |
| <i>Allobates</i>      | <i>juanii</i>                  | 47     | HQ290960 | (1) | --         | --                                                     | --       | --        |
| <i>Allobates</i>      | <i>kingsburyi</i>              | 39     | HQ290963 | (1) | --         | --                                                     | --       | --        |
| <i>Allobates</i>      | <i>marchesianus</i>            | 50     | EU342543 | (2) | --         | --                                                     | --       | --        |
| <i>Allobates</i>      | <i>masniger</i>                | 58     | EU342565 | (2) | --         | --                                                     | --       | --        |
| <i>Allobates</i>      | <i>nidicola</i>                | 36     | EU342518 | (2) | --         | --                                                     | --       | --        |
| <i>Allobates</i>      | <i>olferstoides</i>            | 1      | DQ502126 | (2) | --         | --                                                     | --       | --        |
| <i>Allobates</i>      | <i>ornatus</i>                 | 51     | EU342549 | (2) | --         | --                                                     | --       | --        |
| <i>Allobates</i>      | <i>sp. Ducke</i>               | 61     | DQ502115 | (3) | --         | --                                                     | --       | --        |
| <i>Allobates</i>      | <i>sp. Neblina</i>             | 29     | DQ502074 | (3) | --         | --                                                     | --       | --        |
| <i>Allobates</i>      | <i>sp. Negro</i>               | 38     | EU342525 | (2) | --         | --                                                     | --       | --        |
| <i>Allobates</i>      | <i>sp. Shushufindi</i>         | 53     | EU342555 | (2) | --         | --                                                     | --       | --        |
| <i>Allobates</i>      | <i>sp. Treviso (sp. small)</i> | 57     | EU342563 | (2) | --         | --                                                     | --       | --        |
| <i>Allobates</i>      | <i>talamancae</i>              | 34     | EU342516 | (2) | --         | --                                                     | --       | --        |
| <i>Allobates</i>      | <i>talamancae</i>              | 32     | EU342510 | (2) | --         | --                                                     | --       | --        |
| <i>Allobates</i>      | <i>talamancae</i>              | 35     | EU342517 | (2) | --         | --                                                     | --       | --        |
| <i>Allobates</i>      | <i>talamancae</i>              | 31     | HQ290974 | (1) | --         | --                                                     | --       | --        |

Table S1 (Cont.) Sequences for the species used in the comparative analyses. Gene accession numbers from published sequences. Please review the references for the voucher information.

| Genus                 | Species                  | Phy ID | 12S-16S              | Ref | Voucher          | Locality                                                                                                         | Latitude | Longitude |
|-----------------------|--------------------------|--------|----------------------|-----|------------------|------------------------------------------------------------------------------------------------------------------|----------|-----------|
| <i>Allobates</i>      | <i>talamancae</i>        | 33     | EU342512             | (2) | --               | --                                                                                                               | --       | --        |
| <i>Allobates</i>      | <i>talamancae</i>        | 30     | EU342509             | (2) | --               | --                                                                                                               | --       | --        |
| <i>Allobates</i>      | <i>trilineatus</i>       | 56     | EU342560             | (2) | --               | --                                                                                                               | --       | --        |
| <i>Allobates</i>      | <i>zaparo</i>            | 42     | HQ291003             | (1) | --               | --                                                                                                               | --       | --        |
| <i>Ameerega</i>       | <i>altamazonica</i>      | 103    | EU342623             | (2) | --               | --                                                                                                               | --       | --        |
| <i>Ameerega</i>       | <i>bassleri</i>          | 89     | EU342609             | (2) | --               | --                                                                                                               | --       | --        |
| <i>Ameerega</i>       | <i>bilinguis</i>         | 87     | HQ290996             | (1) | --               | --                                                                                                               | --       | --        |
| <i>Ameerega</i>       | <i>braccata</i>          | 94     | DQ502125             | (3) | --               | --                                                                                                               | --       | --        |
| <i>Ameerega</i>       | <i>cainarachi</i>        | 102    | EU342620             | (2) | --               | --                                                                                                               | --       | --        |
| <i>Ameerega</i>       | <i>flavopicta</i>        | 95     | DQ502124             | (3) | --               | --                                                                                                               | --       | --        |
| <i>Ameerega</i>       | <i>hahneli</i>           | 96     | DQ502270             | (3) | --               | --                                                                                                               | --       | --        |
| <i>Ameerega</i>       | <i>hahneli</i>           | 97     | HQ290998             | (1) | --               | --                                                                                                               | --       | --        |
| <i>Ameerega</i>       | <i>hahneli</i>           | 98     | EU342615             | (2) | --               | --                                                                                                               | --       | --        |
| <i>Ameerega</i>       | <i>hahneli</i>           | 99     | EU342616             | (2) | --               | --                                                                                                               | --       | --        |
| <i>Ameerega</i>       | <i>ignipedis</i>         | 90     | FJ752371<br>FJ752294 | (4) | --               | --                                                                                                               | --       | --        |
| <i>Ameerega</i>       | <i>parvula</i>           | 86     | HQ290999             | (1) | --               | --                                                                                                               | --       | --        |
| <i>Ameerega</i>       | <i>petersi</i>           | 101    | DQ502116             | (3) | --               | --                                                                                                               | --       | --        |
| <i>Ameerega</i>       | <i>picta</i>             | 91     | EU342613             | (2) | --               | --                                                                                                               | --       | --        |
| <i>Ameerega</i>       | <i>picta</i>             | 92     | KJ940455             | --  | TNHCFS<br>5642   | Venezuela: Delta<br>Amacuro: El Palmar,<br>Sierra de Imataca, Reserva<br>Forestal Rio Grande                     | 8.3333   | -61.6667  |
| <i>Ameerega</i>       | <i>picta</i>             | 93     | DQ502252             | (3) | --               | --                                                                                                               | --       | --        |
| <i>Ameerega</i>       | <i>pongoensis</i>        | 88     | DQ522973<br>DQ523044 | (5) | --               | --                                                                                                               | --       | --        |
| <i>Ameerega</i>       | <i>silverstonei</i>      | 85     | DQ283073             | (3) | --               | --                                                                                                               | --       | --        |
| <i>Ameerega</i>       | <i>smaragdina</i>        | 100    | DQ502114             | (3) | --               | --                                                                                                               | --       | --        |
| <i>Ameerega</i>       | <i>trivittata</i>        | 105    | HQ291002             | (1) | --               | --                                                                                                               | --       | --        |
| <i>Ameerega</i>       | <i>trivittata</i>        | 107    | DQ502021             | (3) | --               | --                                                                                                               | --       | --        |
| <i>Ameerega</i>       | <i>trivittata</i>        | 106    | EU342633             | (2) | --               | --                                                                                                               | --       | --        |
| <i>Ameerega</i>       | <i>trivittata</i>        | 104    | EU342626             | (2) | --               | --                                                                                                               | --       | --        |
| <i>Anomaloglossus</i> | <i>baeobatrachus</i>     | 3      | DQ501980             | (3) | --               | --                                                                                                               | --       | --        |
| <i>Anomaloglossus</i> | <i>degranvillei</i>      | 4      | DQ502257             | (3) | --               | --                                                                                                               | --       | --        |
| <i>Anomaloglossus</i> | <i>rufulus</i>           | 5      | KJ940456             | --  | CLBA-<br>Voucher | Venezuela: Bolivar:<br>summit of Churi-tepui                                                                     | 5.3      | -62.1667  |
| <i>Anomaloglossus</i> | <i>verbeeksnyderorum</i> | 2      | HQ290952             | (1) | --               | --                                                                                                               | --       | --        |
| <i>Aromobates</i>     | <i>meridensis</i>        | 7      | JX035992             | --  | CVULA<br>7399    | Venezuela: Merida: Finca<br>El Cedral (Caño Seco)                                                                | 8.65     | -71.43    |
| <i>Aromobates</i>     | <i>saltuensis</i>        | 11     | HQ290970             | (1) | --               | --                                                                                                               | --       | --        |
| <i>Aromobates</i>     | <i>cannatellai</i>       | 9      | JX035995             | --  | CVULA<br>8325    | Venezuela: Tachira:<br>Parque Cascada de la<br>Escalera, en la entrada a<br>Mesa de Perez, municipio<br>Uribante | 8.00308  | -71.7316  |

Table S1 (Cont.) Sequences for the species used in the comparative analyses. Gene accession numbers from published sequences. Please review the references for the voucher information.

| Genus              | Species                  | Phy ID | 12S-16S              | Ref | Voucher    | Locality                                                                                  | Latitude | Longitude |
|--------------------|--------------------------|--------|----------------------|-----|------------|-------------------------------------------------------------------------------------------|----------|-----------|
| <i>Aromobates</i>  | <i>aff. saltuensis</i>   | 10     | JX035993             | --  | CVULA 7180 | Venezuela: Tachira: From a stream that flows into Rio Negro, near Parque Nacional El Tama | 7.57872  | -72.179   |
| <i>Aromobates</i>  | <i>ericksonae</i>        | 8      | HQ290953             | (1) | --         | --                                                                                        | --       | --        |
| <i>Aromobates</i>  | <i>ornatissimus</i>      | 6      | DQ502242             | (3) | --         | --                                                                                        | --       | --        |
| <i>Colostethus</i> | <i>argyrogastrer</i>     | 83     | EU342605             | (2) | --         | --                                                                                        | --       | --        |
| <i>Colostethus</i> | <i>fraterdanieli</i>     | 81     | EU342602             | (2) | --         | --                                                                                        | --       | --        |
| <i>Colostethus</i> | <i>fraterdanieli</i>     | 82     | EU342603             | (2) | --         | --                                                                                        | --       | --        |
| <i>Colostethus</i> | <i>fugax</i>             | 84     | HQ290958             | (1) | --         | --                                                                                        | --       | --        |
| <i>Colostethus</i> | <i>panamansis</i>        | 76     | DQ502169             | (3) | --         | --                                                                                        | --       | --        |
| <i>Colostethus</i> | <i>panamansis</i>        | 75     | HQ290968             | (1) | --         | --                                                                                        | --       | --        |
| <i>Colostethus</i> | <i>pratti</i>            | 80     | DQ502163             | (3) | --         | --                                                                                        | --       | --        |
| <i>Colostethus</i> | <i>pratti</i>            | 79     | EU342595             | (2) | --         | --                                                                                        | --       | --        |
| <i>Colostethus</i> | <i>pratti</i>            | 77     | HQ290969             | (1) | --         | --                                                                                        | --       | --        |
| <i>Colostethus</i> | <i>aff. pratti</i>       | 78     | EU342591             | (2) | --         | --                                                                                        | --       | --        |
| <i>Dendrobates</i> | <i>auratus</i>           | 116    | HQ290980             | (1) | --         | --                                                                                        | --       | --        |
| <i>Dendrobates</i> | <i>bombetes</i>          | 126    | HQ290981             | (1) | --         | --                                                                                        | --       | --        |
| <i>Dendrobates</i> | <i>captivus</i>          | 125    | HQ290982             | (1) | --         | --                                                                                        | --       | --        |
| <i>Dendrobates</i> | <i>castaneoticus</i>     | 114    | EU342642             | (2) | --         | --                                                                                        | --       | --        |
| <i>Dendrobates</i> | <i>claudiae</i>          | 130    | HQ290983             | (1) | --         | --                                                                                        | --       | --        |
| <i>Dendrobates</i> | <i>defleri</i>           | 133    | HQ290979             | (1) | --         | --                                                                                        | --       | --        |
| <i>Dendrobates</i> | <i>fantasticus</i>       | 137    | EU342682             | (2) | --         | --                                                                                        | --       | --        |
| <i>Dendrobates</i> | <i>galactonotus</i>      | 113    | HQ290984             | (1) | --         | --                                                                                        | --       | --        |
| <i>Dendrobates</i> | <i>granuliferus</i>      | 119    | EU342659             | (2) | --         | --                                                                                        | --       | --        |
| <i>Dendrobates</i> | <i>histrionicus</i>      | 121    | HQ290985             | (1) | --         | --                                                                                        | --       | --        |
| <i>Dendrobates</i> | <i>imitator</i>          | 131    | EU342672             | (2) | --         | --                                                                                        | --       | --        |
| <i>Dendrobates</i> | <i>lamasi (sirensis)</i> | 132    | HQ290986             | (1) | --         | --                                                                                        | --       | --        |
| <i>Dendrobates</i> | <i>leucomelas</i>        | 118    | HQ290987             | (1) | --         | --                                                                                        | --       | --        |
| <i>Dendrobates</i> | <i>minutus</i>           | 128    | DQ502168             | (3) | --         | --                                                                                        | --       | --        |
| <i>Dendrobates</i> | <i>mysteriosus</i>       | 124    | DQ371303<br>DQ371314 | (6) | --         | --                                                                                        | --       | --        |
| <i>Dendrobates</i> | <i>pumilio</i>           | 123    | HQ290988             | (1) | --         | --                                                                                        | --       | --        |
| <i>Dendrobates</i> | <i>pumilio</i>           | 122    | EU342664             | (2) | --         | --                                                                                        | --       | --        |
| <i>Dendrobates</i> | <i>reticulatus</i>       | 136    | EU342686             | (2) | --         | --                                                                                        | --       | --        |
| <i>Dendrobates</i> | <i>sp. Quibdo</i>        | 129    | HQ290989             | (1) | --         | --                                                                                        | --       | --        |
| <i>Dendrobates</i> | <i>sylvaticus</i>        | 120    | HQ290990             | (1) | --         | --                                                                                        | --       | --        |
| <i>Dendrobates</i> | <i>tinctorius</i>        | 117    | HQ290991             | (1) | --         | --                                                                                        | --       | --        |
| <i>Dendrobates</i> | <i>truncatus</i>         | 115    | HQ290992             | (1) | --         | --                                                                                        | --       | --        |



Table S1 (Cont.) Sequences for the species used in the comparative analyses. Gene accession numbers from published sequences. Please review the references for the voucher information.

| Genus               | Species                     | Phy ID | 12S-16S  | Ref | Voucher     | Locality                                                 | Latitude | Longitude |
|---------------------|-----------------------------|--------|----------|-----|-------------|----------------------------------------------------------|----------|-----------|
| <i>Dendrobates</i>  | <i>uakarii</i>              | 138    | DQ502266 | (3) | --          | --                                                       | --       | --        |
| <i>Dendrobates</i>  | <i>variabilis</i>           | 135    | EU342679 | (2) | --          | --                                                       | --       | --        |
| <i>Dendrobates</i>  | <i>ventrimaculatus</i>      | 134    | EU342678 | (2) | --          | --                                                       | --       | --        |
| <i>Dendrobates</i>  | <i>ventrimaculatus</i>      | 139    | HQ290993 | (1) | --          | --                                                       | --       | --        |
| <i>Dendrobates</i>  | <i>virolinensis</i>         | 127    | HQ290994 | (1) | --          | --                                                       | --       | --        |
| <i>Epipedobates</i> | <i>anthonyi</i>             | 71     | HQ290995 | (1) | --          | --                                                       | --       | --        |
| <i>Epipedobates</i> | <i>anthonyi</i>             | 70     | EU342574 | (2) | --          | --                                                       | --       | --        |
| <i>Epipedobates</i> | <i>boulengeri</i>           | 67     | HQ290997 | (1) | --          | --                                                       | --       | --        |
| <i>Epipedobates</i> | <i>espinosai</i>            | 69     | EU342571 | (2) | --          | --                                                       | --       | --        |
| <i>Epipedobates</i> | <i>machalilla</i>           | 73     | AY364551 | (2) | --          | --                                                       | --       | --        |
| <i>Epipedobates</i> | <i>machalilla</i>           | 72     | HQ290964 | (1) | --          | --                                                       | --       | --        |
| <i>Epipedobates</i> | <i>sp. F darwinwallacei</i> | 68     | HQ291000 | (1) | --          | --                                                       | --       | --        |
| <i>Epipedobates</i> | <i>tricolor</i>             | 74     | HQ291001 | (1) | --          | --                                                       | --       | --        |
| <i>Hyloxalus</i>    | <i>sp. Agua Azul</i>        | 142    | EU342692 | (2) | --          | --                                                       | --       | --        |
| <i>Hyloxalus</i>    | <i>awa</i>                  | 171    | HQ290954 | (1) | --          | --                                                       | --       | --        |
| <i>Hyloxalus</i>    | <i>azureiventris</i>        | 165    | HQ290977 | (1) | --          | --                                                       | --       | --        |
| <i>Hyloxalus</i>    | <i>bocagei</i>              | 151    | HQ290955 | (1) | --          | --                                                       | --       | --        |
| <i>Hyloxalus</i>    | <i>bocagei</i>              | 150    | AY364545 | (2) | --          | --                                                       | --       | --        |
| <i>Hyloxalus</i>    | <i>craspedoiceps</i>        | 166    | EU342725 | (2) | --          | --                                                       | --       | --        |
| <i>Hyloxalus</i>    | <i>aff. delatorreae</i>     | 163    | EU342719 | (2) | --          | --                                                       | --       | --        |
| <i>Hyloxalus</i>    | <i>delatorreae</i>          | 162    | KJ940457 | --  | JCS-voucher | Ecuador: Carchi: A swamp close to El Moran               | 0.77109  | -78.05596 |
| <i>Hyloxalus</i>    | <i>elachyhistus</i>         | 169    | HQ290956 | (1) | --          | --                                                       | --       | --        |
| <i>Hyloxalus</i>    | <i>elachyhistus</i>         | 168    | EU342737 | (2) | --          | --                                                       | --       | --        |
| <i>Hyloxalus</i>    | <i>erythromos</i>           | 140    | KJ940458 | --  | QCAZ 37750  | Ecuador: Los Rios: Centro Cientifico Rio Palenque (CCRP) | -0.5833  | -79.35    |
| <i>Hyloxalus</i>    | <i>infraguttatus</i>        | 170    | AY364548 | (2) | --          | --                                                       | --       | --        |
| <i>Hyloxalus</i>    | <i>insulatus</i>            | 167    | EU342733 | (2) | --          | --                                                       | --       | --        |
| <i>Hyloxalus</i>    | <i>italoi</i>               | 144    | HQ290972 | (1) | --          | --                                                       | --       | --        |
| <i>Hyloxalus</i>    | <i>jacobuspetersi</i>       | 152    | KJ940459 | --  | QCAZ 37742  | Ecuador: Pichincha Cabeceras del Rio Pita                | -0.43978 | -78.417   |
| <i>Hyloxalus</i>    | <i>maculosus</i>            | 149    | HQ286384 | (7) | --          | --                                                       | --       | --        |
| <i>Hyloxalus</i>    | <i>sp. Negro</i>            | 164    | EU342723 | (2) | --          | --                                                       | --       | --        |
| <i>Hyloxalus</i>    | <i>nexipus</i>              | 154    | HQ290965 | (1) | --          | --                                                       | --       | --        |
| <i>Hyloxalus</i>    | <i>aff. nexipus</i>         | 156    | EU342712 | (2) | --          | --                                                       | --       | --        |
| <i>Hyloxalus</i>    | <i>aff. nexipus</i>         | 155    | EU342711 | (2) | --          | --                                                       | --       | --        |
| <i>Hyloxalus</i>    | <i>pulchellus</i>           | 160    | EU342721 | (2) | --          | --                                                       | --       | --        |
| <i>Hyloxalus</i>    | <i>pulchellus</i>           | 159    | AY364554 | (2) | --          | --                                                       | --       | --        |
| <i>Hyloxalus</i>    | <i>aff. pulchellus</i>      | 161    | EU342716 | (2) | --          | --                                                       | --       | --        |

Table S1 (Cont.) Sequences for the species used in the comparative analyses. Gene accession numbers from published sequences. Please review the references for the voucher information.

| Genus              | Species                 | Phy ID | 12S-16S              | Ref | Voucher     | Locality                                                                                    | Latitude | Longitude |
|--------------------|-------------------------|--------|----------------------|-----|-------------|---------------------------------------------------------------------------------------------|----------|-----------|
| <i>Hyloxalus</i>   | <i>cf. pulcherrimus</i> | 153    | EU342707             | (2) | --          | --                                                                                          | --       | --        |
| <i>Hyloxalus</i>   | <i>sauli</i>            | 148    | HQ290971             | (1) | --          | --                                                                                          | --       | --        |
| <i>Hyloxalus</i>   | <i>sorditatus</i>       | 141    | EU342690             | (2) | --          | --                                                                                          | --       | --        |
| <i>Hyloxalus</i>   | <i>subpunctatus</i>     | 143    | HQ290973             | (1) | --          | --                                                                                          | --       | --        |
| <i>Hyloxalus</i>   | <i>toachi</i>           | 172    | HQ290975             | (1) | --          | --                                                                                          | --       | --        |
| <i>Hyloxalus</i>   | <i>vertebralis</i>      | 157    | EU342715             | (2) | --          | --                                                                                          | --       | --        |
| <i>Hyloxalus</i>   | <i>vertebralis</i>      | 158    | HQ290976             | (1) | --          | --                                                                                          | --       | --        |
| <i>Hyloxalus</i>   | <i>yasuni</i>           | 147    | HQ286388             | (7) | --          | --                                                                                          | --       | --        |
| <i>Hyloxalus</i>   | <i>yasuni</i>           | 145    | EU342697             | (2) | --          | --                                                                                          | --       | --        |
| <i>Hyloxalus</i>   | <i>yasuni</i>           | 146    | AY364559             | (2) | --          | --                                                                                          | --       | --        |
| <i>Mannophryne</i> | <i>urticans</i>         | 25     | KJ940467             | --  | TNHCFS 5520 | Venezuela: Merida: On a stream along a stream near San Juan de Lagunillas                   | 8.520867 | -71.35668 |
| <i>Mannophryne</i> | <i>cordilleriana</i>    | 20     | KJ940460             | --  | TNHCFS 5589 | Venezuela: Merida: A stream near the road to Pueblo Llano                                   | 8.87835  | -70.65482 |
| <i>Mannophryne</i> | <i>herminae</i>         | 19     | KJ940461             | --  | TNHCFS 5676 | Venezuela: Aragua: Near Estacion Biologica Rancho Grande                                    | 10.34958 | -67.68432 |
| <i>Mannophryne</i> | sp. Guatopo             | 15     | KJ940462             | --  | TNHCFS 5666 | Venezuela: Miranda: On road to Altigracia, Guatopo National Park                            | 10.08495 | -66.48908 |
| <i>Mannophryne</i> | <i>leonardo</i>         | 16     | KJ940463             | --  | TNHCFS 5659 | Venezuela: Monagas: Near the Cueva del Guacharo, proximity to Caripe River                  | 10.17088 | -63.5536  |
| <i>Mannophryne</i> | <i>olmonae</i>          | 12     | AY191230<br>AY206717 | (8) | --          | --                                                                                          | --       | --        |
| <i>Mannophryne</i> | <i>orellana</i>         | 22     | KJ940464             | --  | CVULA 7165  | Venezuela: Tachira: A stream along the road from Pregonero to La Trampa                     | 8.03252  | -71.7277  |
| <i>Mannophryne</i> | <i>orellana</i>         | 21     | KJ940465             | --  | CVULA 7231  | Venezuela: Tachira: From a stream that flows into Rio Negro, near Parque Nacional El Tama   | 7.57872  | -72.17898 |
| <i>Mannophryne</i> | <i>riveroi</i>          | 13     | EU342503             | (2) | --          | --                                                                                          | --       | --        |
| <i>Mannophryne</i> | <i>trinitatis</i>       | 17     | EU342504             | (2) | --          | --                                                                                          | --       | --        |
| <i>Mannophryne</i> | <i>collaris</i>         | 23     | KJ940466             | --  | TNHCFS 5515 | Venezuela: Merida: On a stream along the autopista El Vija to Merida near sector Trujillana | 8.543683 | -71.58303 |
| <i>Mannophryne</i> | <i>collaris</i>         | 24     | HQ291004             | (1) | --          | --                                                                                          | --       | --        |
| <i>Mannophryne</i> | <i>venezuelensis</i>    | 18     | KJ940468             | --  | TNHCFS 5649 | Venezuela: Sucre: Peninsula de Paria National Park                                          | 10.68992 | -62.61023 |
| <i>Mannophryne</i> | <i>vulcano</i>          | 14     | KJ940469             | --  | TNHCFS 5679 | Venezuela: Miranda: Northern slope of Cerro El Volcan, Baruta                               | 10.42317 | -66.85782 |
| <i>Mannophryne</i> | <i>yustizi</i>          | 26     | KJ940470             | --  | TNHCFS 5604 | Venezuela: Lara: Stream along the road to Guarico, near Sabana Grande                       | 9.58228  | -69.8498  |
| <i>Phyllobates</i> | <i>aurotaenia</i>       | 108    | HQ291005             | (1) | --          | --                                                                                          | --       | --        |
| <i>Phyllobates</i> | <i>lugubris</i>         | 111    | EU342636             | (2) | --          | --                                                                                          | --       | --        |
| <i>Phyllobates</i> | <i>lugubris</i>         | 112    | DQ283043             | (3) | --          | --                                                                                          | --       | --        |

Table S1 (Cont.) Sequences for the species used in the comparative analyses. Gene accession numbers from published sequences. Please review the references for the voucher information.

| Genus                | Species           | Phy ID | 12S-16S  | Ref | Voucher | Locality | Latitude | Longitude |
|----------------------|-------------------|--------|----------|-----|---------|----------|----------|-----------|
| <i>Phyllobates</i>   | <i>terribilis</i> | 109    | HQ291006 | (1) | --      | --       | --       | --        |
| <i>Phyllobates</i>   | <i>vittatus</i>   | 110    | EU342635 | (2) | --      | --       | --       | --        |
| <i>Rheobates</i>     | <i>palmatus</i>   | 28     | HQ290967 | (1) | --      | --       | --       | --        |
| <i>Rheobates</i>     | <i>palmatus</i>   | 27     | EU342506 | (2) | --      | --       | --       | --        |
| <i>Silverstoneia</i> | <i>flotator</i>   | 62     | HQ290957 | (1) | --      | --       | --       | --        |
| <i>Silverstoneia</i> | <i>flotator</i>   | 63     | EU342587 | (2) | --      | --       | --       | --        |
| <i>Silverstoneia</i> | <i>nubicola</i>   | 66     | EU342581 | (2) | --      | --       | --       | --        |
| <i>Silverstoneia</i> | <i>nubicola</i>   | 65     | EU342580 | (2) | --      | --       | --       | --        |
| <i>Silverstoneia</i> | <i>nubicola</i>   | 64     | HQ290966 | (1) | --      | --       | --       | --        |

Table S1 (Cont.) Metabolic variables from poison frogs including phylogeny identifier (Phy ID).

| Genus            | Species                        | Phy ID | N  | Body Mass (g) |       | RMR (VO <sub>2rest</sub> mL/ h) |       | AMR (VO <sub>2active</sub> mL/ h) |       | Scope:<br>AMR – RMR<br>(VO <sub>2Scope</sub> mL/ h) |
|------------------|--------------------------------|--------|----|---------------|-------|---------------------------------|-------|-----------------------------------|-------|-----------------------------------------------------|
|                  |                                |        |    | $\bar{X}$     | SD    | $\bar{X}$                       | SD    | $\bar{X}$                         | SD    |                                                     |
| <i>Allobates</i> | <i>algorei</i>                 | 60     | 6  | 0.585         | 0.013 | 0.168                           | 0.019 | 0.593                             | 0.071 | 0.425                                               |
| <i>Allobates</i> | <i>brunneus</i>                | 37     | -- | --            | --    | --                              | --    | --                                | --    | --                                                  |
| <i>Allobates</i> | <i>caeruleodactylus</i>        | 48     | -- | --            | --    | --                              | --    | --                                | --    | --                                                  |
| <i>Allobates</i> | <i>crombiei</i>                | 52     | -- | --            | --    | --                              | --    | --                                | --    | --                                                  |
| <i>Allobates</i> | <i>femoralis</i>               | 43     | 6  | 1.246         | 0.103 | 0.223                           | 0.031 | 1.104                             | 0.228 | 0.881                                               |
| <i>Allobates</i> | <i>femoralis</i>               | 46     | -- | --            | --    | --                              | --    | --                                | --    | --                                                  |
| <i>Allobates</i> | <i>femoralis</i>               | 44     | -- | --            | --    | --                              | --    | --                                | --    | --                                                  |
| <i>Allobates</i> | <i>femoralis</i>               | 40     | -- | --            | --    | --                              | --    | --                                | --    | --                                                  |
| <i>Allobates</i> | <i>femoralis</i>               | 41     | -- | --            | --    | --                              | --    | --                                | --    | --                                                  |
| <i>Allobates</i> | <i>femoralis</i>               | 45     | -- | --            | --    | --                              | --    | --                                | --    | --                                                  |
| <i>Allobates</i> | <i>granti</i>                  | 49     | -- | --            | --    | --                              | --    | --                                | --    | --                                                  |
| <i>Allobates</i> | <i>humilis</i>                 | 59     | -- | --            | --    | --                              | --    | --                                | --    | --                                                  |
| <i>Allobates</i> | <i>insperatus</i>              | 54     | 4  | 0.551         | 0.041 | 0.082                           | 0.018 | 0.609                             | 0.03  | 0.527                                               |
| <i>Allobates</i> | <i>aff. insperatus</i>         | 55     | -- | --            | --    | --                              | --    | --                                | --    | --                                                  |
| <i>Allobates</i> | <i>juanii</i>                  | 47     | 2  | 0.685         | 0.085 | 0.147                           | 0.064 | 0.766                             | 0.008 | 0.619                                               |
| <i>Allobates</i> | <i>kingsburyi</i>              | 39     | 8  | 0.875         | 0.102 | 0.126                           | 0.016 | 0.644                             | 0.032 | 0.518                                               |
| <i>Allobates</i> | <i>marchesianus</i>            | 50     | -- | --            | --    | --                              | --    | --                                | --    | --                                                  |
| <i>Allobates</i> | <i>masniger</i>                | 58     | -- | --            | --    | --                              | --    | --                                | --    | --                                                  |
| <i>Allobates</i> | <i>nidicola</i>                | 36     | -- | --            | --    | --                              | --    | --                                | --    | --                                                  |
| <i>Allobates</i> | <i>olfersioides</i>            | 1      | -- | --            | --    | --                              | --    | --                                | --    | --                                                  |
| <i>Allobates</i> | <i>ornatus</i>                 | 51     | -- | --            | --    | --                              | --    | --                                | --    | --                                                  |
| <i>Allobates</i> | <i>sp. Ducke</i>               | 61     | -- | --            | --    | --                              | --    | --                                | --    | --                                                  |
| <i>Allobates</i> | <i>sp. Neblina</i>             | 29     | -- | --            | --    | --                              | --    | --                                | --    | --                                                  |
| <i>Allobates</i> | <i>sp. Negro</i>               | 38     | -- | --            | --    | --                              | --    | --                                | --    | --                                                  |
| <i>Allobates</i> | <i>sp. Shushufindi</i>         | 53     | -- | --            | --    | --                              | --    | --                                | --    | --                                                  |
| <i>Allobates</i> | <i>sp. Treviso (sp. small)</i> | 57     | -- | --            | --    | --                              | --    | --                                | --    | --                                                  |
| <i>Allobates</i> | <i>talamancae</i>              | 34     | -- | --            | --    | --                              | --    | --                                | --    | --                                                  |
| <i>Allobates</i> | <i>talamancae</i>              | 32     | 5  | 0.88          | 0.087 | 0.08                            | 0.014 | 0.714                             | 0.05  | 0.634                                               |
| <i>Allobates</i> | <i>talamancae</i>              | 35     | -- | --            | --    | --                              | --    | --                                | --    | --                                                  |
| <i>Allobates</i> | <i>talamancae</i>              | 31     | -- | --            | --    | --                              | --    | --                                | --    | --                                                  |
| <i>Allobates</i> | <i>talamancae</i>              | 33     | -- | --            | --    | --                              | --    | --                                | --    | --                                                  |
| <i>Allobates</i> | <i>talamancae</i>              | 30     | -- | --            | --    | --                              | --    | --                                | --    | --                                                  |
| <i>Allobates</i> | <i>trilineatus</i>             | 56     | -- | --            | --    | --                              | --    | --                                | --    | --                                                  |
| <i>Allobates</i> | <i>zaparo</i>                  | 42     | 10 | 1.615         | 0.133 | 0.299                           | 0.029 | 1.919                             | 0.108 | 1.62                                                |
| <i>Ameerega</i>  | <i>altamazonica</i>            | 103    | -- | --            | --    | --                              | --    | --                                | --    | --                                                  |

Table S1 (Cont.) Metabolic variables from poison frogs including phylogeny identifier (Phy ID).

| Genus                 | Species                  | Phy ID | N  | Body Mass (g) |       | RMR (VO <sub>2rest</sub> mL/h) |       | AMR (VO <sub>2active</sub> mL/h) |       | Scope:<br>AMR – RMR<br>(VO <sub>2Scope</sub> mL/h) |
|-----------------------|--------------------------|--------|----|---------------|-------|--------------------------------|-------|----------------------------------|-------|----------------------------------------------------|
|                       |                          |        |    | $\bar{X}$     | SD    | $\bar{X}$                      | SD    | $\bar{X}$                        | SD    |                                                    |
| <i>Ameerega</i>       | <i>bassleri</i>          | 89     | -- | --            | --    | --                             | --    | --                               | --    | --                                                 |
| <i>Ameerega</i>       | <i>bilinguis</i>         | 87     | 11 | 0.949         | 0.077 | 0.18                           | 0.011 | 0.974                            | 0.051 | 0.794                                              |
| <i>Ameerega</i>       | <i>braccata</i>          | 94     | -- | --            | --    | --                             | --    | --                               | --    | --                                                 |
| <i>Ameerega</i>       | <i>cainarachi</i>        | 102    | -- | --            | --    | --                             | --    | --                               | --    | --                                                 |
| <i>Ameerega</i>       | <i>flavopicta</i>        | 95     | -- | --            | --    | --                             | --    | --                               | --    | --                                                 |
| <i>Ameerega</i>       | <i>hahneli</i>           | 96     | -- | --            | --    | --                             | --    | --                               | --    | --                                                 |
| <i>Ameerega</i>       | <i>hahneli</i>           | 97     | 6  | 0.343         | 0.02  | 0.1                            | 0.011 | 0.516                            | 0.013 | 0.416                                              |
| <i>Ameerega</i>       | <i>hahneli</i>           | 98     | -- | --            | --    | --                             | --    | --                               | --    | --                                                 |
| <i>Ameerega</i>       | <i>hahneli</i>           | 99     | -- | --            | --    | --                             | --    | --                               | --    | --                                                 |
| <i>Ameerega</i>       | <i>ignipedis</i>         | 90     | -- | --            | --    | --                             | --    | --                               | --    | --                                                 |
| <i>Ameerega</i>       | <i>parvula</i>           | 86     | 8  | 1.569         | 0.049 | 0.293                          | 0.033 | 1.497                            | 0.17  | 1.204                                              |
| <i>Ameerega</i>       | <i>petersi</i>           | 101    | -- | --            | --    | --                             | --    | --                               | --    | --                                                 |
| <i>Ameerega</i>       | <i>picta</i>             | 91     | -- | --            | --    | --                             | --    | --                               | --    | --                                                 |
| <i>Ameerega</i>       | <i>picta</i>             | 92     | -- | --            | --    | --                             | --    | --                               | --    | --                                                 |
| <i>Ameerega</i>       | <i>picta</i>             | 93     | -- | --            | --    | --                             | --    | --                               | --    | --                                                 |
| <i>Ameerega</i>       | <i>pongoensis</i>        | 88     | -- | --            | --    | --                             | --    | --                               | --    | --                                                 |
| <i>Ameerega</i>       | <i>silverstonei</i>      | 85     | -- | --            | --    | --                             | --    | --                               | --    | --                                                 |
| <i>Ameerega</i>       | <i>smaragdina</i>        | 100    | -- | --            | --    | --                             | --    | --                               | --    | --                                                 |
| <i>Ameerega</i>       | <i>trivittata</i>        | 105    | 3  | 5.512         | 0.994 | 0.964                          | 0.178 | 6.632                            | 0.924 | 5.668                                              |
| <i>Ameerega</i>       | <i>trivittata</i>        | 107    | -- | --            | --    | --                             | --    | --                               | --    | --                                                 |
| <i>Ameerega</i>       | <i>trivittata</i>        | 106    | -- | --            | --    | --                             | --    | --                               | --    | --                                                 |
| <i>Ameerega</i>       | <i>trivittata</i>        | 104    | -- | --            | --    | --                             | --    | --                               | --    | --                                                 |
| <i>Anomaloglossus</i> | <i>baeobatrachus</i>     | 3      | -- | --            | --    | --                             | --    | --                               | --    | --                                                 |
| <i>Anomaloglossus</i> | <i>degranvillei</i>      | 4      | -- | --            | --    | --                             | --    | --                               | --    | --                                                 |
| <i>Anomaloglossus</i> | <i>rufulus</i>           | 5      | -- | --            | --    | --                             | --    | --                               | --    | --                                                 |
| <i>Anomaloglossus</i> | <i>verbeeksnyderorum</i> | 2      | 11 | 0.808         | 0.051 | 0.202                          | 0.022 | 0.73                             | 0.068 | 0.528                                              |
| <i>Aromobates</i>     | <i>meridensis</i>        | 7      | -- | --            | --    | --                             | --    | --                               | --    | --                                                 |
| <i>Aromobates</i>     | <i>saltuensis</i>        | 11     | 6  | 1.498         | 0.138 | 0.212                          | 0.046 | 1.249                            | 0.202 | 1.037                                              |
| <i>Aromobates</i>     | <i>cannatellai</i>       | 9      | -- | --            | --    | --                             | --    | --                               | --    | --                                                 |
| <i>Aromobates</i>     | aff. <i>saltuensis</i>   | 10     | -- | --            | --    | --                             | --    | --                               | --    | --                                                 |
| <i>Aromobates</i>     | <i>ericksonae</i>        | 8      | 17 | 1.312         | 0.114 | 0.248                          | 0.022 | 0.916                            | 0.093 | 0.668                                              |
| <i>Aromobates</i>     | <i>ornatissimus</i>      | 6      | -- | --            | --    | --                             | --    | --                               | --    | --                                                 |
| <i>Colostethus</i>    | <i>argyrogastrer</i>     | 83     | -- | --            | --    | --                             | --    | --                               | --    | --                                                 |
| <i>Colostethus</i>    | <i>fraterdanieli</i>     | 81     | -- | --            | --    | --                             | --    | --                               | --    | --                                                 |
| <i>Colostethus</i>    | <i>fraterdanieli</i>     | 82     | -- | --            | --    | --                             | --    | --                               | --    | --                                                 |

Table S6 (Cont.) Metabolic variables from poison frogs including phylogeny identifier (Phy ID).

| Genus               | Species                  | Phy ID | N  | Body Mass (g) |       | RMR (VO <sub>2rest</sub> mL/h) |       | AMR (VO <sub>2active</sub> mL/h) |       | Scope:<br>AMR – RMR<br>(VO <sub>2Scope</sub> mL/h) |
|---------------------|--------------------------|--------|----|---------------|-------|--------------------------------|-------|----------------------------------|-------|----------------------------------------------------|
|                     |                          |        |    | $\bar{X}$     | SD    | $\bar{X}$                      | SD    | $\bar{X}$                        | SD    |                                                    |
| <i>Colostethus</i>  | <i>fugax</i>             | 84     | 4  | 0.959         | 0.089 | 0.124                          | 0.013 | 0.667                            | 0.054 | 0.543                                              |
| <i>Colostethus</i>  | <i>panamansis</i>        | 76     | -- | --            | --    | --                             | --    | --                               | --    | --                                                 |
| <i>Colostethus</i>  | <i>panamansis</i>        | 75     | 5  | 0.973         | 0.093 | 0.096                          | 0.004 | 1.159                            | 0.085 | 1.063                                              |
| <i>Colostethus</i>  | <i>pratti</i>            | 80     | -- | --            | --    | --                             | --    | --                               | --    | --                                                 |
| <i>Colostethus</i>  | <i>pratti</i>            | 79     | -- | --            | --    | --                             | --    | --                               | --    | --                                                 |
| <i>Colostethus</i>  | <i>pratti</i>            | 77     | 12 | 0.806         | 0.031 | 0.111                          | 0.008 | 1.133                            | 0.051 | 1.022                                              |
| <i>Colostethus</i>  | aff. <i>pratti</i>       | 78     | -- | --            | --    | --                             | --    | --                               | --    | --                                                 |
| <i>Dendrobates</i>  | <i>auratus</i>           | 116    | 15 | 1.996         | 0.071 | 0.306                          | 0.039 | 2.81                             | 0.124 | 2.504                                              |
| <i>Dendrobates</i>  | <i>bombetes</i>          | 126    | 8  | 0.528         | 0.036 | 0.085                          | 0.007 | 0.885                            | 0.056 | 0.8                                                |
| <i>Dendrobates</i>  | <i>captivus</i>          | 125    | 6  | 0.484         | 0.025 | 0.087                          | 0.014 | 0.602                            | 0.039 | 0.515                                              |
| <i>Dendrobates</i>  | <i>castaneoticus</i>     | 114    | -- | --            | --    | --                             | --    | --                               | --    | --                                                 |
| <i>Dendrobates</i>  | <i>claudiae</i>          | 130    | 1  | 0.217         |       | 0.06                           |       | 0.652                            |       | 0.592                                              |
| <i>Dendrobates</i>  | <i>defleri</i>           | 133    | -- | --            | --    | --                             | --    | --                               | --    | --                                                 |
| <i>Dendrobates</i>  | <i>fantasticus</i>       | 137    | -- | --            | --    | --                             | --    | --                               | --    | --                                                 |
| <i>Dendrobates</i>  | <i>galactonotus</i>      | 113    | 4  | 3.589         | 0.293 | 0.323                          | 0.009 | 4.97                             | 0.225 | 4.647                                              |
| <i>Dendrobates</i>  | <i>granuliferus</i>      | 119    | -- | --            | --    | --                             | --    | --                               | --    | --                                                 |
| <i>Dendrobates</i>  | <i>histrionicus</i>      | 121    | 4  | 3.32          | 0.119 | 0.205                          | 0.021 | 2.496                            | 0.301 | 2.291                                              |
| <i>Dendrobates</i>  | <i>imitator</i>          | 131    | -- | --            | --    | --                             | --    | --                               | --    | --                                                 |
| <i>Dendrobates</i>  | <i>lamasi (sirensis)</i> | 132    | 2  | 0.39          | 0.07  | 0.068                          | 0.015 | 1.074                            | 0.062 | 1.006                                              |
| <i>Dendrobates</i>  | <i>leucomelas</i>        | 118    | 12 | 2.243         | 0.138 | 0.414                          | 0.055 | 3.167                            | 0.273 | 2.753                                              |
| <i>Dendrobates</i>  | <i>minutus</i>           | 128    | -- | --            | --    | --                             | --    | --                               | --    | --                                                 |
| <i>Dendrobates</i>  | <i>mysteriosus</i>       | 124    | -- | --            | --    | --                             | --    | --                               | --    | --                                                 |
| <i>Dendrobates</i>  | <i>pumilio</i>           | 123    | 17 | 0.538         | 0.017 | 0.067                          | 0.003 | 0.698                            | 0.026 | 0.631                                              |
| <i>Dendrobates</i>  | <i>pumilio</i>           | 122    | -- | --            | --    | --                             | --    | --                               | --    | --                                                 |
| <i>Dendrobates</i>  | <i>reticulatus</i>       | 136    | -- | --            | --    | --                             | --    | --                               | --    | --                                                 |
| <i>Dendrobates</i>  | sp. Quibdo               | 129    | 3  | 0.16          | 0.01  | 0.051                          | 0.019 | 0.577                            | 0.263 | 0.526                                              |
| <i>Dendrobates</i>  | <i>sylvaticus</i>        | 120    | 11 | 2.889         | 0.133 | 0.4                            | 0.054 | 3.328                            | 0.188 | 2.928                                              |
| <i>Dendrobates</i>  | <i>tinctorius</i>        | 117    | 8  | 5.037         | 0.358 | 0.549                          | 0.051 | 5.983                            | 0.767 | 5.434                                              |
| <i>Dendrobates</i>  | <i>truncatus</i>         | 115    | 12 | 1.573         | 0.115 | 0.188                          | 0.016 | 1.926                            | 0.111 | 1.738                                              |
| <i>Dendrobates</i>  | <i>uakarii</i>           | 138    | -- | --            | --    | --                             | --    | --                               | --    | --                                                 |
| <i>Dendrobates</i>  | <i>variabilis</i>        | 135    | -- | --            | --    | --                             | --    | --                               | --    | --                                                 |
| <i>Dendrobates</i>  | <i>ventrimaculatus</i>   | 134    | 7  | 0.414         | 0.03  | 0.095                          | 0.012 | 0.686                            | 0.06  | 0.591                                              |
| <i>Dendrobates</i>  | <i>ventrimaculatus</i>   | 139    | 7  | 0.345         | 0.056 | 0.134                          | 0.044 | 0.661                            | 0.098 | 0.527                                              |
| <i>Dendrobates</i>  | <i>virolinensis</i>      | 127    | 8  | 0.475         | 0.051 | 0.094                          | 0.006 | 0.639                            | 0.03  | 0.545                                              |
| <i>Epipedobates</i> | <i>anthonyi</i>          | 71     | 10 | 1.062         | 0.052 | 0.197                          | 0.009 | 1.207                            | 0.036 | 1.01                                               |

Table S1 (Cont.) Metabolic variables from poison frogs including phylogeny identifier (Phy ID).

| Genus               | Species                     | Phy ID | N  | Body Mass (g) |       | RMR (VO <sub>2rest</sub> mL/h) |       | AMR (VO <sub>2active</sub> mL/h) |       | Scope:<br>AMR – RMR<br>(VO <sub>2Scope</sub> mL/h) |
|---------------------|-----------------------------|--------|----|---------------|-------|--------------------------------|-------|----------------------------------|-------|----------------------------------------------------|
|                     |                             |        |    | $\bar{X}$     | SD    | $\bar{X}$                      | SD    | $\bar{X}$                        | SD    |                                                    |
| <i>Epipedobates</i> | <i>anthonyi</i>             | 70     | -- | --            | --    | --                             | --    | --                               | --    | --                                                 |
| <i>Epipedobates</i> | <i>boulengeri</i>           | 67     | 16 | 0.427         | 0.018 | 0.097                          | 0.012 | 0.329                            | 0.023 | 0.232                                              |
| <i>Epipedobates</i> | <i>espinosai</i>            | 69     | -- | --            | --    | --                             | --    | --                               | --    | --                                                 |
| <i>Epipedobates</i> | <i>machalilla</i>           | 73     | 11 | 0.323         | 0.022 | 0.083                          | 0.009 | 0.385                            | 0.049 | 0.302                                              |
| <i>Epipedobates</i> | <i>machalilla</i>           | 72     | -- | --            | --    | --                             | --    | --                               | --    | --                                                 |
| <i>Epipedobates</i> | <i>sp. F darwinwallacei</i> | 68     | 10 | 0.457         | 0.026 | 0.065                          | 0.005 | 0.596                            | 0.036 | 0.531                                              |
| <i>Epipedobates</i> | <i>tricolor</i>             | 74     | 4  | 0.801         | 0.051 | 0.164                          | 0.022 | 0.836                            | 0.089 | 0.672                                              |
| <i>Hyloxalus</i>    | <i>sp. Agua Azul</i>        | 142    | -- | --            | --    | --                             | --    | --                               | --    | --                                                 |
| <i>Hyloxalus</i>    | <i>awa</i>                  | 171    | 10 | 0.915         | 0.05  | 0.121                          | 0.005 | 0.653                            | 0.038 | 0.532                                              |
| <i>Hyloxalus</i>    | <i>azureiventris</i>        | 165    | 4  | 1.018         | 0.063 | 0.208                          | 0.026 | 1.309                            | 0.017 | 1.101                                              |
| <i>Hyloxalus</i>    | <i>bocagei</i>              | 151    | -- | --            | --    | --                             | --    | --                               | --    | --                                                 |
| <i>Hyloxalus</i>    | <i>bocagei</i>              | 150    | 11 | 1.514         | 0.141 | 0.288                          | 0.029 | 2.307                            | 0.22  | 2.019                                              |
| <i>Hyloxalus</i>    | <i>craspedocephs</i>        | 166    | -- | --            | --    | --                             | --    | --                               | --    | --                                                 |
| <i>Hyloxalus</i>    | <i>aff. delatorreae</i>     | 163    | -- | --            | --    | --                             | --    | --                               | --    | --                                                 |
| <i>Hyloxalus</i>    | <i>delatorreae</i>          | 162    | -- | --            | --    | --                             | --    | --                               | --    | --                                                 |
| <i>Hyloxalus</i>    | <i>elachyhistus</i>         | 169    | 28 | 0.958         | 0.054 | 0.248                          | 0.019 | 0.84                             | 0.06  | 0.592                                              |
| <i>Hyloxalus</i>    | <i>elachyhistus</i>         | 168    | -- | --            | --    | --                             | --    | --                               | --    | --                                                 |
| <i>Hyloxalus</i>    | <i>erythromos</i>           | 140    | -- | --            | --    | --                             | --    | --                               | --    | --                                                 |
| <i>Hyloxalus</i>    | <i>infraguttatus</i>        | 170    | -- | --            | --    | --                             | --    | --                               | --    | --                                                 |
| <i>Hyloxalus</i>    | <i>insulatus</i>            | 167    | -- | --            | --    | --                             | --    | --                               | --    | --                                                 |
| <i>Hyloxalus</i>    | <i>italoi</i>               | 144    | -- | --            | --    | --                             | --    | --                               | --    | --                                                 |
| <i>Hyloxalus</i>    | <i>jacobuspetersi</i>       | 152    | -- | --            | --    | --                             | --    | --                               | --    | --                                                 |
| <i>Hyloxalus</i>    | <i>maculosus</i>            | 149    | 20 | 2.3           | 0.144 | 0.34                           | 0.03  | 2.003                            | 0.152 | 1.663                                              |
| <i>Hyloxalus</i>    | <i>sp. Negro</i>            | 164    | -- | --            | --    | --                             | --    | --                               | --    | --                                                 |
| <i>Hyloxalus</i>    | <i>nexipus</i>              | 154    | 3  | 1.066         | 0.181 | 0.264                          | 0.092 | 1.236                            | 0.084 | 0.972                                              |
| <i>Hyloxalus</i>    | <i>aff. nexipus</i>         | 156    | -- | --            | --    | --                             | --    | --                               | --    | --                                                 |
| <i>Hyloxalus</i>    | <i>aff. nexipus</i>         | 155    | -- | --            | --    | --                             | --    | --                               | --    | --                                                 |
| <i>Hyloxalus</i>    | <i>pulchellus</i>           | 160    | -- | --            | --    | --                             | --    | --                               | --    | --                                                 |
| <i>Hyloxalus</i>    | <i>pulchellus</i>           | 159    | -- | --            | --    | --                             | --    | --                               | --    | --                                                 |
| <i>Hyloxalus</i>    | <i>aff. pulchellus</i>      | 161    | -- | --            | --    | --                             | --    | --                               | --    | --                                                 |
| <i>Hyloxalus</i>    | <i>cf. pulcherrimus</i>     | 153    | -- | --            | --    | --                             | --    | --                               | --    | --                                                 |
| <i>Hyloxalus</i>    | <i>sauli</i>                | 148    | 3  | 1.703         | 0.313 | 0.331                          | 0.093 | 2.365                            | 0.206 | 2.034                                              |
| <i>Hyloxalus</i>    | <i>sorditatus</i>           | 141    | -- | --            | --    | --                             | --    | --                               | --    | --                                                 |
| <i>Hyloxalus</i>    | <i>subpunctatus</i>         | 143    | 7  | 0.799         | 0.07  | 0.151                          | 0.013 | 0.901                            | 0.059 | 0.75                                               |
| <i>Hyloxalus</i>    | <i>toachi</i>               | 172    | 5  | 0.68          | 0.082 | 0.117                          | 0.017 | 0.872                            | 0.074 | 0.755                                              |

Table S1 (Cont.) Metabolic variables from poison frogs including phylogeny identifier (Phy ID).

| Genus                | Species              | Phy ID | N  | Body Mass (g) |       | RMR (VO <sub>2rest</sub> mL/h) |       | AMR (VO <sub>2active</sub> mL/h) |       | Scope:<br>AMR – RMR<br>(VO <sub>2Scope</sub> mL/h) |
|----------------------|----------------------|--------|----|---------------|-------|--------------------------------|-------|----------------------------------|-------|----------------------------------------------------|
|                      |                      |        |    | $\bar{X}$     | SD    | $\bar{X}$                      | SD    | $\bar{X}$                        | SD    |                                                    |
| <i>Hyloxalus</i>     | <i>vertebralis</i>   | 157    | -- | --            | --    | --                             | --    | --                               | --    | --                                                 |
| <i>Hyloxalus</i>     | <i>vertebralis</i>   | 158    | 8  | 0.698         | 0.051 | 0.127                          | 0.021 | 0.567                            | 0.052 | 0.44                                               |
| <i>Hyloxalus</i>     | <i>yasuni</i>        | 147    | -- | --            | --    | --                             | --    | --                               | --    | --                                                 |
| <i>Hyloxalus</i>     | <i>yasuni</i>        | 145    | -- | --            | --    | --                             | --    | --                               | --    | --                                                 |
| <i>Hyloxalus</i>     | <i>yasuni</i>        | 146    | -- | --            | --    | --                             | --    | --                               | --    | --                                                 |
| <i>Mannophryne</i>   | <i>urticans</i>      | 25     | 35 | 1.833         | 0.144 | 0.362                          | 0.042 | 1.502                            | 0.159 | 1.14                                               |
| <i>Mannophryne</i>   | <i>cordilleriana</i> | 20     | -- | --            | --    | --                             | --    | --                               | --    | --                                                 |
| <i>Mannophryne</i>   | <i>herminae</i>      | 19     | -- | --            | --    | --                             | --    | --                               | --    | --                                                 |
| <i>Mannophryne</i>   | <i>sp. Guatopo</i>   | 15     | -- | --            | --    | --                             | --    | --                               | --    | --                                                 |
| <i>Mannophryne</i>   | <i>leonardo</i>      | 16     | -- | --            | --    | --                             | --    | --                               | --    | --                                                 |
| <i>Mannophryne</i>   | <i>olmonae</i>       | 12     | -- | --            | --    | --                             | --    | --                               | --    | --                                                 |
| <i>Mannophryne</i>   | <i>orellana</i>      | 22     | -- | --            | --    | --                             | --    | --                               | --    | --                                                 |
| <i>Mannophryne</i>   | <i>orellana</i>      | 21     | -- | --            | --    | --                             | --    | --                               | --    | --                                                 |
| <i>Mannophryne</i>   | <i>riveroi</i>       | 13     | -- | --            | --    | --                             | --    | --                               | --    | --                                                 |
| <i>Mannophryne</i>   | <i>trinitatis</i>    | 17     | -- | --            | --    | --                             | --    | --                               | --    | --                                                 |
| <i>Mannophryne</i>   | <i>collaris</i>      | 23     | -- | --            | --    | --                             | --    | --                               | --    | --                                                 |
| <i>Mannophryne</i>   | <i>collaris</i>      | 24     | -- | --            | --    | --                             | --    | --                               | --    | --                                                 |
| <i>Mannophryne</i>   | <i>venezuelensis</i> | 18     | -- | --            | --    | --                             | --    | --                               | --    | --                                                 |
| <i>Mannophryne</i>   | <i>vulcano</i>       | 14     | -- | --            | --    | --                             | --    | --                               | --    | --                                                 |
| <i>Mannophryne</i>   | <i>yustizi</i>       | 26     | -- | --            | --    | --                             | --    | --                               | --    | --                                                 |
| <i>Phyllobates</i>   | <i>aurotaenia</i>    | 108    | 3  | 2.017         | 0.447 | 0.184                          | 0.074 | 1.347                            | 0.252 | 1.163                                              |
| <i>Phyllobates</i>   | <i>lugubris</i>      | 111    | -- | --            | --    | --                             | --    | --                               | --    | --                                                 |
| <i>Phyllobates</i>   | <i>lugubris</i>      | 112    | -- | --            | --    | --                             | --    | --                               | --    | --                                                 |
| <i>Phyllobates</i>   | <i>terribilis</i>    | 109    | 5  | 6.013         | 0.125 | 0.787                          | 0.113 | 5.092                            | 0.101 | 4.305                                              |
| <i>Phyllobates</i>   | <i>vittatus</i>      | 110    | -- | --            | --    | --                             | --    | --                               | --    | --                                                 |
| <i>Rheobates</i>     | <i>palmatus</i>      | 28     | 15 | 1.78          | 0.181 | 0.368                          | 0.037 | 1.563                            | 0.154 | 1.195                                              |
| <i>Rheobates</i>     | <i>palmatus</i>      | 27     | -- | --            | --    | --                             | --    | --                               | --    | --                                                 |
| <i>Silverstoneia</i> | <i>flotator</i>      | 62     | 10 | 0.327         | 0.013 | 0.054                          | 0.005 | 0.491                            | 0.027 | 0.437                                              |
| <i>Silverstoneia</i> | <i>flotator</i>      | 63     | -- | --            | --    | --                             | --    | --                               | --    | --                                                 |
| <i>Silverstoneia</i> | <i>nubicola</i>      | 66     | -- | --            | --    | --                             | --    | --                               | --    | --                                                 |
| <i>Silverstoneia</i> | <i>nubicola</i>      | 65     | -- | --            | --    | --                             | --    | --                               | --    | --                                                 |
| <i>Silverstoneia</i> | <i>nubicola</i>      | 64     | 7  | 0.371         | 0.032 | 0.043                          | 0.003 | 0.636                            | 0.048 | 0.593                                              |



Table S1 (Cont.) Coloration and lipophilic alkaloid scores used in the logistic regressions of poison frogs. Coloration score is based on color contrast thresholds to binary state (0, 1) based on the species  $\Sigma S_i$  (Table S3). Alka Score is the evidence of presence or ability to sequester lipophilic alkaloids (i.e., 1 = yes or 0 = no).

| Genus            | Species                        | Phy ID | Color Contrast Threshold |    |    |    |    |    | $\Sigma S_i$ | Alka Score | Alka Ref |
|------------------|--------------------------------|--------|--------------------------|----|----|----|----|----|--------------|------------|----------|
|                  |                                |        | 3                        | 4  | 5  | 6  | 7  | 8  |              |            |          |
| <i>Allobates</i> | <i>algorei</i>                 | 60     | 0                        | 0  | 0  | 0  | 0  | 0  | 2            | --         | --       |
| <i>Allobates</i> | <i>brunneus</i>                | 37     | 1                        | 1  | 0  | 0  | 0  | 0  | 4            | --         | --       |
| <i>Allobates</i> | <i>caeruleodactylus</i>        | 48     | 0                        | 0  | 0  | 0  | 0  | 0  | 2            | --         | --       |
| <i>Allobates</i> | <i>crombiei</i>                | 52     | 1                        | 0  | 0  | 0  | 0  | 0  | 3            | --         | --       |
| <i>Allobates</i> | <i>femoralis</i>               | 43     | 1                        | 1  | 1  | 0  | 0  | 0  | 5            | 0          | (9)      |
| <i>Allobates</i> | <i>femoralis</i>               | 46     | 1                        | 1  | 1  | 0  | 0  | 0  | 5            | 0          | (9)      |
| <i>Allobates</i> | <i>femoralis</i>               | 44     | 1                        | 1  | 1  | 0  | 0  | 0  | 5            | 0          | (9)      |
| <i>Allobates</i> | <i>femoralis</i>               | 40     | 1                        | 1  | 1  | 1  | 0  | 0  | 6            | 0          | (9)      |
| <i>Allobates</i> | <i>femoralis</i>               | 41     | 1                        | 1  | 1  | 1  | 0  | 0  | 6            | 0          | (9)      |
| <i>Allobates</i> | <i>femoralis</i>               | 45     | 1                        | 1  | 1  | 1  | 0  | 0  | 6            | 0          | (9)      |
| <i>Allobates</i> | <i>granti</i>                  | 49     | 0                        | 0  | 0  | 0  | 0  | 0  | 1            | --         | --       |
| <i>Allobates</i> | <i>humilis</i>                 | 59     | 0                        | 0  | 0  | 0  | 0  | 0  | 2            | --         | --       |
| <i>Allobates</i> | <i>insperatus</i>              | 54     | 0                        | 0  | 0  | 0  | 0  | 0  | 2            | 0          | (10)     |
| <i>Allobates</i> | <i>aff. insperatus</i>         | 55     | 0                        | 0  | 0  | 0  | 0  | 0  | 2            | --         | --       |
| <i>Allobates</i> | <i>juanii</i>                  | 47     | 0                        | 0  | 0  | 0  | 0  | 0  | 2            | --         | --       |
| <i>Allobates</i> | <i>kingsburyi</i>              | 39     | 0                        | 0  | 0  | 0  | 0  | 0  | 2            | 0          | (1)      |
| <i>Allobates</i> | <i>marchesianus</i>            | 50     | 0                        | 0  | 0  | 0  | 0  | 0  | 2            | --         | --       |
| <i>Allobates</i> | <i>masniger</i>                | 58     | 0                        | 0  | 0  | 0  | 0  | 0  | 1            | --         | --       |
| <i>Allobates</i> | <i>nidicola</i>                | 36     | 0                        | 0  | 0  | 0  | 0  | 0  | 2            | --         | --       |
| <i>Allobates</i> | <i>olfersioides</i>            | 1      | 1                        | 0  | 0  | 0  | 0  | 0  | 3            | --         | --       |
| <i>Allobates</i> | <i>ornatus</i>                 | 51     | 0                        | 0  | 0  | 0  | 0  | 0  | 2            | --         | --       |
| <i>Allobates</i> | <i>sp. Ducke</i>               | 61     | 0                        | 0  | 0  | 0  | 0  | 0  | 2            | --         | --       |
| <i>Allobates</i> | <i>sp. Neblina</i>             | 29     | --                       | -- | -- | -- | -- | -- | --           | --         | --       |
| <i>Allobates</i> | <i>sp. Negro</i>               | 38     | 0                        | 0  | 0  | 0  | 0  | 0  | 2            | --         | --       |
| <i>Allobates</i> | <i>sp. Shushufindi</i>         | 53     | 0                        | 0  | 0  | 0  | 0  | 0  | 2            | --         | --       |
| <i>Allobates</i> | <i>sp. Treviso (sp. small)</i> | 57     | 0                        | 0  | 0  | 0  | 0  | 0  | 2            | --         | --       |
| <i>Allobates</i> | <i>talamancae</i>              | 34     | 0                        | 0  | 0  | 0  | 0  | 0  | 1            | 0          | (11)     |
| <i>Allobates</i> | <i>talamancae</i>              | 32     | 0                        | 0  | 0  | 0  | 0  | 0  | 1            | 0          | (11)     |
| <i>Allobates</i> | <i>talamancae</i>              | 35     | 0                        | 0  | 0  | 0  | 0  | 0  | 1            | 0          | (11)     |
| <i>Allobates</i> | <i>talamancae</i>              | 31     | 0                        | 0  | 0  | 0  | 0  | 0  | 1            | 0          | (11)     |
| <i>Allobates</i> | <i>talamancae</i>              | 33     | 0                        | 0  | 0  | 0  | 0  | 0  | 1            | 0          | (11)     |
| <i>Allobates</i> | <i>talamancae</i>              | 30     | 0                        | 0  | 0  | 0  | 0  | 0  | 1            | 0          | (11)     |
| <i>Allobates</i> | <i>trilineatus</i>             | 56     | 0                        | 0  | 0  | 0  | 0  | 0  | 2            | --         | --       |
| <i>Allobates</i> | <i>zaparo</i>                  | 42     | 1                        | 1  | 1  | 1  | 0  | 0  | 6            | 0          | (9)      |
| <i>Ameerega</i>  | <i>altamazonica</i>            | 103    | 1                        | 1  | 1  | 0  | 0  | 0  | 5            | --         | --       |

Table S1 (Cont.) Coloration and lipophilic alkaloid scores used in the logistic regressions of poison frogs. Coloration score is based on color contrast thresholds to binary state (0, 1) based on the species  $\Sigma S_i$  (Table S3). Alka Score is the evidence of presence or ability to sequester lipophilic alkaloids (i.e., 1 = yes or 0 = no).

| Genus                 | Species                  | Phy ID | Color Contrast Threshold |   |   |   |   |   | $\Sigma S_i$ | Alka Score | Alka Ref |
|-----------------------|--------------------------|--------|--------------------------|---|---|---|---|---|--------------|------------|----------|
|                       |                          |        | 3                        | 4 | 5 | 6 | 7 | 8 |              |            |          |
| <i>Ameerega</i>       | <i>bassleri</i>          | 89     | 1                        | 1 | 1 | 1 | 0 | 0 | 6            | 1          | (12)     |
| <i>Ameerega</i>       | <i>bilinguis</i>         | 87     | 1                        | 1 | 1 | 1 | 1 | 0 | 7            | 1          | (12)     |
| <i>Ameerega</i>       | <i>braccata</i>          | 94     | 1                        | 1 | 1 | 1 | 1 | 1 | 8            | --         | --       |
| <i>Ameerega</i>       | <i>cainarachi</i>        | 102    | 1                        | 1 | 1 | 1 | 1 | 1 | 8            | 1          | (12)     |
| <i>Ameerega</i>       | <i>flavopicta</i>        | 95     | 1                        | 1 | 1 | 1 | 1 | 1 | 8            | 1          | (13)     |
| <i>Ameerega</i>       | <i>hahneli</i>           | 96     | 1                        | 1 | 1 | 0 | 0 | 0 | 5            | 1          | (14)     |
| <i>Ameerega</i>       | <i>hahneli</i>           | 97     | 1                        | 1 | 1 | 0 | 0 | 0 | 5            | 1          | (14)     |
| <i>Ameerega</i>       | <i>hahneli</i>           | 98     | 1                        | 1 | 1 | 0 | 0 | 0 | 5            | 1          | (14)     |
| <i>Ameerega</i>       | <i>hahneli</i>           | 99     | 1                        | 1 | 1 | 0 | 0 | 0 | 5            | 1          | (14)     |
| <i>Ameerega</i>       | <i>ignipedis</i>         | 90     | 1                        | 1 | 1 | 1 | 0 | 0 | 6            | --         | --       |
| <i>Ameerega</i>       | <i>parvula</i>           | 86     | 1                        | 1 | 1 | 1 | 0 | 0 | 6            | 1          | (14)     |
| <i>Ameerega</i>       | <i>petersi</i>           | 101    | 1                        | 1 | 1 | 0 | 0 | 0 | 5            | 1          | (12)     |
| <i>Ameerega</i>       | <i>picta</i>             | 91     | 1                        | 1 | 1 | 0 | 0 | 0 | 5            | 1          | (15)     |
| <i>Ameerega</i>       | <i>picta</i>             | 92     | 1                        | 1 | 1 | 0 | 0 | 0 | 5            | 1          | (12)     |
| <i>Ameerega</i>       | <i>picta</i>             | 93     | 1                        | 1 | 1 | 0 | 0 | 0 | 5            | 1          | (12)     |
| <i>Ameerega</i>       | <i>pongoensis</i>        | 88     | 1                        | 1 | 1 | 1 | 1 | 0 | 7            | --         | --       |
| <i>Ameerega</i>       | <i>silverstonei</i>      | 85     | 1                        | 1 | 1 | 1 | 0 | 0 | 6            | 1          | (12)     |
| <i>Ameerega</i>       | <i>smaragdina</i>        | 100    | 1                        | 1 | 1 | 1 | 1 | 0 | 7            | --         | --       |
| <i>Ameerega</i>       | <i>trivittata</i>        | 105    | 1                        | 1 | 1 | 1 | 0 | 0 | 6            | 1          | (12)     |
| <i>Ameerega</i>       | <i>trivittata</i>        | 107    | 1                        | 1 | 1 | 1 | 0 | 0 | 6            | 1          | (12)     |
| <i>Ameerega</i>       | <i>trivittata</i>        | 106    | 1                        | 1 | 1 | 1 | 0 | 0 | 6            | 1          | (12)     |
| <i>Ameerega</i>       | <i>trivittata</i>        | 104    | 1                        | 1 | 1 | 1 | 0 | 0 | 6            | 1          | (12)     |
| <i>Anomaloglossus</i> | <i>baeobatrachus</i>     | 3      | 0                        | 0 | 0 | 0 | 0 | 0 | 2            | --         | --       |
| <i>Anomaloglossus</i> | <i>degranvillei</i>      | 4      | 0                        | 0 | 0 | 0 | 0 | 0 | 2            | --         | --       |
| <i>Anomaloglossus</i> | <i>rufulus</i>           | 5      | 0                        | 0 | 0 | 0 | 0 | 0 | 1            | --         | --       |
| <i>Anomaloglossus</i> | <i>verbeeksnyderorum</i> | 2      | 1                        | 0 | 0 | 0 | 0 | 0 | 3            | --         | --       |
| <i>Aromobates</i>     | <i>meridensis</i>        | 7      | 0                        | 0 | 0 | 0 | 0 | 0 | 1            | --         | --       |
| <i>Aromobates</i>     | <i>saluensis</i>         | 11     | 1                        | 1 | 1 | 0 | 0 | 0 | 5            | --         | --       |
| <i>Aromobates</i>     | <i>cannatellai</i>       | 9      | 1                        | 1 | 0 | 0 | 0 | 0 | 4            | --         | --       |
| <i>Aromobates</i>     | aff. <i>saluensis</i>    | 10     | 1                        | 0 | 0 | 0 | 0 | 0 | 3            | --         | --       |
| <i>Aromobates</i>     | <i>ericksonae</i>        | 8      | 1                        | 1 | 0 | 0 | 0 | 0 | 4            | --         | --       |
| <i>Aromobates</i>     | <i>ornatissimus</i>      | 6      | 0                        | 0 | 0 | 0 | 0 | 0 | 2            | --         | --       |
| <i>Colostethus</i>    | <i>argyrogaster</i>      | 83     | 1                        | 1 | 0 | 0 | 0 | 0 | 4            | --         | --       |
| <i>Colostethus</i>    | <i>fraterdanieli</i>     | 81     | 1                        | 1 | 1 | 0 | 0 | 0 | 5            | --         | --       |
| <i>Colostethus</i>    | <i>fraterdanieli</i>     | 82     | 1                        | 1 | 1 | 0 | 0 | 0 | 5            | --         | --       |

Table S1 (Cont.) Coloration and lipophilic alkaloid scores used in the logistic regressions of poison frogs. Coloration score is based on color contrast thresholds to binary state (0, 1) based on the species  $\Sigma S_i$  (Table S3). Alka Score is the evidence of presence or ability to sequester lipophilic alkaloids (i.e., 1 = yes or 0 = no).

| Genus               | Species                  | Phy ID | Color Contrast Threshold |   |   |   |   |   | $\Sigma S_i$ | Alka Score | Alka Ref |
|---------------------|--------------------------|--------|--------------------------|---|---|---|---|---|--------------|------------|----------|
|                     |                          |        | 3                        | 4 | 5 | 6 | 7 | 8 |              |            |          |
| <i>Colostethus</i>  | <i>fugax</i>             | 84     | 1                        | 0 | 0 | 0 | 0 | 0 | 3            | 0          | (1)      |
| <i>Colostethus</i>  | <i>panamansis</i>        | 76     | 1                        | 1 | 1 | 0 | 0 | 0 | 5            | 0          | (11)     |
| <i>Colostethus</i>  | <i>panamansis</i>        | 75     | 1                        | 1 | 1 | 0 | 0 | 0 | 5            | 0          | (11)     |
| <i>Colostethus</i>  | <i>pratti</i>            | 80     | 1                        | 0 | 0 | 0 | 0 | 0 | 3            | 0          | (11)     |
| <i>Colostethus</i>  | <i>pratti</i>            | 79     | 1                        | 0 | 0 | 0 | 0 | 0 | 3            | 0          | (11)     |
| <i>Colostethus</i>  | <i>pratti</i>            | 77     | 1                        | 0 | 0 | 0 | 0 | 0 | 3            | 0          | (11)     |
| <i>Colostethus</i>  | <i>aff. pratti</i>       | 78     | 1                        | 0 | 0 | 0 | 0 | 0 | 3            | 0          | (11)     |
| <i>Dendrobates</i>  | <i>auratus</i>           | 116    | 1                        | 1 | 1 | 1 | 0 | 0 | 6            | 1          | (14)     |
| <i>Dendrobates</i>  | <i>bombetes</i>          | 126    | 1                        | 1 | 1 | 1 | 0 | 0 | 6            | 1          | (14)     |
| <i>Dendrobates</i>  | <i>captivus</i>          | 125    | 1                        | 1 | 1 | 1 | 0 | 0 | 6            | 1          | (1)      |
| <i>Dendrobates</i>  | <i>castaneoticus</i>     | 114    | 1                        | 1 | 1 | 1 | 1 | 1 | 8            | 1          | (12)     |
| <i>Dendrobates</i>  | <i>claudiae</i>          | 130    | 1                        | 1 | 1 | 1 | 0 | 0 | 6            | 1          | (14)     |
| <i>Dendrobates</i>  | <i>defleri</i>           | 133    | 1                        | 1 | 1 | 1 | 1 | 0 | 7            | --         | --       |
| <i>Dendrobates</i>  | <i>fantasticus</i>       | 137    | 1                        | 1 | 1 | 1 | 0 | 0 | 6            | 1          | (16)     |
| <i>Dendrobates</i>  | <i>galactonotus</i>      | 113    | 1                        | 1 | 1 | 1 | 0 | 0 | 6            | 1          | (12)     |
| <i>Dendrobates</i>  | <i>granuliferus</i>      | 119    | 1                        | 1 | 1 | 1 | 0 | 0 | 6            | 1          | (14)     |
| <i>Dendrobates</i>  | <i>histrionicus</i>      | 121    | 1                        | 1 | 1 | 1 | 0 | 0 | 6            | 1          | (14)     |
| <i>Dendrobates</i>  | <i>imitator</i>          | 131    | 1                        | 1 | 1 | 1 | 0 | 0 | 6            | 1          | (16)     |
| <i>Dendrobates</i>  | <i>lamasi (sirensis)</i> | 132    | 1                        | 1 | 1 | 1 | 1 | 1 | 8            | --         | --       |
| <i>Dendrobates</i>  | <i>leucomelas</i>        | 118    | 1                        | 1 | 1 | 1 | 0 | 0 | 6            | 1          | (14)     |
| <i>Dendrobates</i>  | <i>minutus</i>           | 128    | 1                        | 1 | 1 | 1 | 1 | 1 | 9            | 1          | (14)     |
| <i>Dendrobates</i>  | <i>mysteriosus</i>       | 124    | 1                        | 1 | 1 | 1 | 0 | 0 | 6            | --         | --       |
| <i>Dendrobates</i>  | <i>pumilio</i>           | 123    | 1                        | 1 | 1 | 1 | 0 | 0 | 6            | 1          | (14)     |
| <i>Dendrobates</i>  | <i>pumilio</i>           | 122    | 1                        | 1 | 1 | 1 | 0 | 0 | 6            | 1          | (14)     |
| <i>Dendrobates</i>  | <i>reticulatus</i>       | 136    | 1                        | 1 | 1 | 1 | 0 | 0 | 6            | 1          | (14)     |
| <i>Dendrobates</i>  | <i>sp. Quibdo</i>        | 129    | 1                        | 1 | 1 | 1 | 1 | 1 | 9            | 1          | (14)     |
| <i>Dendrobates</i>  | <i>sylvaticus</i>        | 120    | 1                        | 1 | 1 | 1 | 0 | 0 | 6            | 1          | (14)     |
| <i>Dendrobates</i>  | <i>tinctorius</i>        | 117    | 1                        | 1 | 1 | 1 | 0 | 0 | 6            | 1          | (14)     |
| <i>Dendrobates</i>  | <i>truncatus</i>         | 115    | 1                        | 1 | 1 | 1 | 0 | 0 | 6            | 1          | (14)     |
| <i>Dendrobates</i>  | <i>uakarii</i>           | 138    | 1                        | 1 | 1 | 1 | 1 | 1 | 8            | --         | --       |
| <i>Dendrobates</i>  | <i>variabilis</i>        | 135    | 1                        | 1 | 1 | 1 | 0 | 0 | 6            | 1          | (16)     |
| <i>Dendrobates</i>  | <i>ventrimaculatus</i>   | 134    | 1                        | 1 | 1 | 1 | 1 | 0 | 7            | --         | --       |
| <i>Dendrobates</i>  | <i>ventrimaculatus</i>   | 139    | 1                        | 1 | 1 | 1 | 1 | 0 | 7            | 1          | (14)     |
| <i>Dendrobates</i>  | <i>virolinensis</i>      | 127    | 1                        | 1 | 1 | 1 | 0 | 0 | 6            | --         | --       |
| <i>Epipedobates</i> | <i>anthonyi</i>          | 71     | 1                        | 1 | 1 | 1 | 1 | 1 | 9            | 1          | (14)     |

Table S1 (Cont.) Coloration and lipophilic alkaloid scores used in the logistic regressions of poison frogs. Coloration score is based on color contrast thresholds to binary state (0, 1) based on the species  $\Sigma S_i$  (Table S3). Alka Score is the evidence of presence or ability to sequester lipophilic alkaloids (i.e., 1 = yes or 0 = no).

| Genus               | Species                       | Phy ID | Color Contrast Threshold |   |   |   |   |   | $\Sigma S_i$ | Alka Score | Alka Ref |
|---------------------|-------------------------------|--------|--------------------------|---|---|---|---|---|--------------|------------|----------|
|                     |                               |        | 3                        | 4 | 5 | 6 | 7 | 8 |              |            |          |
| <i>Epipedobates</i> | <i>anthonyi</i>               | 70     | 1                        | 1 | 1 | 1 | 1 | 1 | 11           | 1          | (14)     |
| <i>Epipedobates</i> | <i>boulengeri</i>             | 67     | 1                        | 1 | 0 | 0 | 0 | 0 | 4            | 0          | (10)     |
| <i>Epipedobates</i> | <i>espinosai</i>              | 69     | 1                        | 1 | 0 | 0 | 0 | 0 | 4            | 1          | (14)     |
| <i>Epipedobates</i> | <i>machalilla</i>             | 73     | 1                        | 1 | 0 | 0 | 0 | 0 | 4            | 0          | (1)      |
| <i>Epipedobates</i> | <i>machalilla</i>             | 72     | 1                        | 1 | 0 | 0 | 0 | 0 | 4            | 0          | (1)      |
| <i>Epipedobates</i> | <i>sp. F (darwinwallacei)</i> | 68     | 1                        | 1 | 1 | 1 | 1 | 0 | 7            | 1          | (14)     |
| <i>Epipedobates</i> | <i>tricolor</i>               | 74     | 1                        | 1 | 1 | 1 | 1 | 1 | 10           | --         | --       |
| <i>Hyloxalus</i>    | <i>sp. Agua Azul</i>          | 142    | 0                        | 0 | 0 | 0 | 0 | 0 | 2            | --         | --       |
| <i>Hyloxalus</i>    | <i>awa</i>                    | 171    | 1                        | 0 | 0 | 0 | 0 | 0 | 3            | 0          | (17)     |
| <i>Hyloxalus</i>    | <i>azureiventris</i>          | 165    | 1                        | 1 | 1 | 1 | 1 | 1 | 8            | 1          | (18)     |
| <i>Hyloxalus</i>    | <i>bocagei</i>                | 151    | 1                        | 0 | 0 | 0 | 0 | 0 | 3            | --         | --       |
| <i>Hyloxalus</i>    | <i>bocagei</i>                | 150    | 1                        | 0 | 0 | 0 | 0 | 0 | 3            | --         | --       |
| <i>Hyloxalus</i>    | <i>craspedocephs</i>          | 166    | 1                        | 0 | 0 | 0 | 0 | 0 | 3            | --         | --       |
| <i>Hyloxalus</i>    | <i>aff. delatorreae</i>       | 163    | 1                        | 0 | 0 | 0 | 0 | 0 | 3            | --         | --       |
| <i>Hyloxalus</i>    | <i>delatorreae</i>            | 162    | 1                        | 0 | 0 | 0 | 0 | 0 | 3            | --         | --       |
| <i>Hyloxalus</i>    | <i>elachyhistus</i>           | 169    | 1                        | 0 | 0 | 0 | 0 | 0 | 3            | 0          | (11)     |
| <i>Hyloxalus</i>    | <i>elachyhistus</i>           | 168    | 1                        | 0 | 0 | 0 | 0 | 0 | 3            | 0          | (11)     |
| <i>Hyloxalus</i>    | <i>erythromos</i>             | 140    | 0                        | 0 | 0 | 0 | 0 | 0 | 2            | 1          | (19)     |
| <i>Hyloxalus</i>    | <i>infraguttatus</i>          | 170    | 1                        | 0 | 0 | 0 | 0 | 0 | 3            | --         | --       |
| <i>Hyloxalus</i>    | <i>insulatus</i>              | 167    | 1                        | 0 | 0 | 0 | 0 | 0 | 3            | --         | --       |
| <i>Hyloxalus</i>    | <i>italoi</i>                 | 144    | 0                        | 0 | 0 | 0 | 0 | 0 | 2            | --         | --       |
| <i>Hyloxalus</i>    | <i>jacobuspetersi</i>         | 152    | 0                        | 0 | 0 | 0 | 0 | 0 | 1            | --         | --       |
| <i>Hyloxalus</i>    | <i>maculosus</i>              | 149    | 0                        | 0 | 0 | 0 | 0 | 0 | 1            | 0          | (9)      |
| <i>Hyloxalus</i>    | <i>sp. Negro</i>              | 164    | 1                        | 0 | 0 | 0 | 0 | 0 | 3            | --         | --       |
| <i>Hyloxalus</i>    | <i>nexipus</i>                | 154    | 1                        | 1 | 1 | 1 | 0 | 0 | 6            | 0          | (1)      |
| <i>Hyloxalus</i>    | <i>aff. nexipus</i>           | 156    | 1                        | 1 | 1 | 1 | 0 | 0 | 6            | 0          | (1)      |
| <i>Hyloxalus</i>    | <i>aff. nexipus</i>           | 155    | 1                        | 1 | 1 | 1 | 0 | 0 | 6            | 0          | (1)      |
| <i>Hyloxalus</i>    | <i>pulchellus</i>             | 160    | 0                        | 0 | 0 | 0 | 0 | 0 | 2            | --         | --       |
| <i>Hyloxalus</i>    | <i>pulchellus</i>             | 159    | 0                        | 0 | 0 | 0 | 0 | 0 | 2            | --         | --       |
| <i>Hyloxalus</i>    | <i>aff. pulchellus</i>        | 161    | 0                        | 0 | 0 | 0 | 0 | 0 | 2            | --         | --       |
| <i>Hyloxalus</i>    | <i>cf. pulcherrimus</i>       | 153    | 0                        | 0 | 0 | 0 | 0 | 0 | 2            | --         | --       |
| <i>Hyloxalus</i>    | <i>sauli</i>                  | 148    | 1                        | 1 | 0 | 0 | 0 | 0 | 4            | 0          | (10)     |
| <i>Hyloxalus</i>    | <i>sorditatus</i>             | 141    | 0                        | 0 | 0 | 0 | 0 | 0 | 0            | --         | --       |
| <i>Hyloxalus</i>    | <i>subpunctatus</i>           | 143    | 0                        | 0 | 0 | 0 | 0 | 0 | 2            | --         | --       |
| <i>Hyloxalus</i>    | <i>toachi</i>                 | 172    | 1                        | 0 | 0 | 0 | 0 | 0 | 3            | --         | --       |

Table S1 (Cont.) Coloration and lipophilic alkaloid scores used in the logistic regressions of poison frogs. Coloration score is based on color contrast thresholds to binary state (0, 1) based on the species  $\Sigma S_i$  (Table S3). Alka Score is the evidence of presence or ability to sequester lipophilic alkaloids (i.e., 1 = yes or 0 = no).

| Genus                | Species              | Phy ID | Color Constrast Threshold |   |   |   |   |   | $\Sigma S_i$ | Alka Score | Alka Ref |
|----------------------|----------------------|--------|---------------------------|---|---|---|---|---|--------------|------------|----------|
|                      |                      |        | 3                         | 4 | 5 | 6 | 7 | 8 |              |            |          |
| <i>Hyloxalus</i>     | <i>vertebralis</i>   | 157    | 0                         | 0 | 0 | 0 | 0 | 0 | 1            | 0          | (1)      |
| <i>Hyloxalus</i>     | <i>vertebralis</i>   | 158    | 0                         | 0 | 0 | 0 | 0 | 0 | 1            | 0          | (1)      |
| <i>Hyloxalus</i>     | <i>yasuni</i>        | 147    | 0                         | 0 | 0 | 0 | 0 | 0 | 1            | 0          | (10)     |
| <i>Hyloxalus</i>     | <i>yasuni</i>        | 145    | 0                         | 0 | 0 | 0 | 0 | 0 | 1            | 0          | (10)     |
| <i>Hyloxalus</i>     | <i>yasuni</i>        | 146    | 0                         | 0 | 0 | 0 | 0 | 0 | 1            | 0          | (10)     |
| <i>Mannophryne</i>   | <i>urticans</i>      | 25     | 0                         | 0 | 0 | 0 | 0 | 0 | 2            | 0          | (11)     |
| <i>Mannophryne</i>   | <i>cordilleriana</i> | 20     | 0                         | 0 | 0 | 0 | 0 | 0 | 2            | --         | --       |
| <i>Mannophryne</i>   | <i>herminae</i>      | 19     | 1                         | 0 | 0 | 0 | 0 | 0 | 3            | --         | --       |
| <i>Mannophryne</i>   | <i>sp. Guatopo</i>   | 15     | 1                         | 0 | 0 | 0 | 0 | 0 | 3            | --         | --       |
| <i>Mannophryne</i>   | <i>leonardo</i>      | 16     | 1                         | 0 | 0 | 0 | 0 | 0 | 3            | --         | --       |
| <i>Mannophryne</i>   | <i>olmonae</i>       | 12     | 0                         | 0 | 0 | 0 | 0 | 0 | 2            | 0          | (20)     |
| <i>Mannophryne</i>   | <i>orellana</i>      | 22     | 0                         | 0 | 0 | 0 | 0 | 0 | 2            | --         | --       |
| <i>Mannophryne</i>   | <i>orellana</i>      | 21     | 0                         | 0 | 0 | 0 | 0 | 0 | 2            | --         | --       |
| <i>Mannophryne</i>   | <i>riveroi</i>       | 13     | 0                         | 0 | 0 | 0 | 0 | 0 | 2            | 0          | (20)     |
| <i>Mannophryne</i>   | <i>trinitatis</i>    | 17     | 0                         | 0 | 0 | 0 | 0 | 0 | 2            | 0          | (20)     |
| <i>Mannophryne</i>   | <i>collaris</i>      | 23     | 1                         | 0 | 0 | 0 | 0 | 0 | 3            | --         | --       |
| <i>Mannophryne</i>   | <i>collaris</i>      | 24     | 1                         | 0 | 0 | 0 | 0 | 0 | 3            | --         | --       |
| <i>Mannophryne</i>   | <i>venezuelensis</i> | 18     | 0                         | 0 | 0 | 0 | 0 | 0 | 2            | --         | --       |
| <i>Mannophryne</i>   | <i>vulcano</i>       | 14     | 1                         | 0 | 0 | 0 | 0 | 0 | 3            | --         | --       |
| <i>Mannophryne</i>   | <i>yusttizi</i>      | 26     | 1                         | 0 | 0 | 0 | 0 | 0 | 3            | --         | --       |
| <i>Phyllobates</i>   | <i>aurotaenia</i>    | 108    | 1                         | 1 | 1 | 1 | 0 | 0 | 6            | 1          | (14)     |
| <i>Phyllobates</i>   | <i>lugubris</i>      | 111    | 1                         | 1 | 1 | 1 | 0 | 0 | 6            | 1          | (14)     |
| <i>Phyllobates</i>   | <i>lugubris</i>      | 112    | 1                         | 1 | 1 | 1 | 0 | 0 | 6            | 1          | (14)     |
| <i>Phyllobates</i>   | <i>terribilis</i>    | 109    | 1                         | 1 | 1 | 1 | 0 | 0 | 6            | 1          | (14)     |
| <i>Phyllobates</i>   | <i>vittatus</i>      | 110    | 1                         | 1 | 1 | 1 | 1 | 0 | 7            | 1          | (14)     |
| <i>Rheobates</i>     | <i>palmatus</i>      | 28     | 1                         | 0 | 0 | 0 | 0 | 0 | 3            | --         | --       |
| <i>Rheobates</i>     | <i>palmatus</i>      | 27     | 1                         | 0 | 0 | 0 | 0 | 0 | 3            | --         | --       |
| <i>Silverstoneia</i> | <i>flotator</i>      | 62     | 1                         | 0 | 0 | 0 | 0 | 0 | 3            | 0          | (21)     |
| <i>Silverstoneia</i> | <i>flotator</i>      | 63     | 1                         | 0 | 0 | 0 | 0 | 0 | 3            | 0          | (21)     |
| <i>Silverstoneia</i> | <i>nubicola</i>      | 66     | 0                         | 0 | 0 | 0 | 0 | 0 | 2            | 0          | (21)     |
| <i>Silverstoneia</i> | <i>nubicola</i>      | 65     | 0                         | 0 | 0 | 0 | 0 | 0 | 2            | 0          | (21)     |
| <i>Silverstoneia</i> | <i>nubicola</i>      | 64     | 0                         | 0 | 0 | 0 | 0 | 0 | 2            | 0          | (21)     |

## References Table S1

1. Santos JC & Cannatella DC (2011) Phenotypic integration emerges from aposematism and scale in poison frogs. *Proc Natl Acad Sci USA* 108(15):6175-6180.
2. Santos JC, *et al.* (2009) Amazonian amphibian diversity is primarily derived from late Miocene Andean lineages. *PLoS Biol* 7(3):e56  
doi:10.1371/journal.pbio.1000056
3. Grant T, *et al.* (2006) Phylogenetic systematics of dart-poison frogs and their relatives (Anura: Athesphatanura: Dendrobatidae). *Bulletin of the American Museum of Natural History* 299:1-262.
4. Brown JL & Twomey E (2009) Complicated histories: three new species of poison frogs of the genus *Ameerega* (Anura: Dendrobatidae) from north-central Peru. *Zootaxa* (2049):1-38.
5. Roberts JL, *et al.* (2006) Genetic divergence and speciation in lowland and montane peruvian poison frogs. *Mol Phylogenet Evol* 41(1):149-164.
6. Roberts JL, *et al.* (2006) Phylogenetic relationships among poison frogs of the genus *Dendrobates* (Dendrobatidae): A molecular perspective from increased taxon sampling. *Herpetological Journal* 16(4):377-385.
7. Paez-Vacas MI, Coloma LA, & Santos JC (2010) Systematics of the *Hyloxalus bocagei* complex (Anura: Dendrobatidae), description of two new cryptic species, and recognition of *H. maculosus*. *Zootaxa* 2711:1-75.
8. Manzanilla J, La Marca E, & Garcia-Paris M (2009) Phylogenetic patterns of diversification in a clade of Neotropical frogs (Anura: Aromobatidae: Mannophryne). *Biol J Linn Soc* 97(1):185-199.
9. Darst CR, Cummings ME, & Cannatella DC (2006) A mechanism for diversity in warning signals: conspicuousness versus toxicity in poison frogs. *Proc Natl Acad Sci USA* 103(15):58252-55857.
10. Darst CR, Menendez-Guerrero PA, Coloma LA, & Cannatella DC (2005) Evolution of dietary specialization and chemical defense in poison frogs (Dendrobatidae): a comparative analysis. *Am Nat* 165(1):56-69.
11. Daly JW, Gusovsky F, Myers CW, Yotsu-Yamashita M, & Yasumoto T (1994) First occurrence of tetrodotoxin in a dendrobatid frog (*Colostethus inguinalis*), with further reports for the bufonid genus *Atelopus*. *Toxicon* 32(3):279-285.
12. Daly JW, Ware N, Saporito RA, Spande TF, & Garraffo HM (2009) N-Methyldecahydroquinolines: An Unexpected Class of Alkaloids from Amazonian Poison Frogs (Dendrobatidae). *J Nat Prod* 72(6):1110-1114.
13. Mortari MR, *et al.* (2004) Main alkaloids from the Brazilian dendrobatidae frog *Epipedobates flavopictus*: pumiliotoxin 251D, histrionicotoxin and decahydroquinolines. *Toxicon* 43(3):303-310.
14. Daly JW, Myers CW, & Whittaker N (1987) Further classification of skin alkaloids from neotropical poison frogs (Dendrobatidae), with a general survey of toxic/noxious substances in the Amphibia. *Toxicon* 25(10):1023-1095.
15. Mebs D, Jansen M, Kohler G, Pogoda W, & Kauert G (2010) Myrmecophagy and alkaloid sequestration in amphibians: a study on *Ameerega picta* (Dendrobatidae) and *Elachistocleis* sp (Microhylidae) frogs. *Salamandra* 46(1):11-15.

16. Spande TF, *et al.* (1999) Occurrence and significance of decahydroquinolines from dendrobatid poison frogs and a myrmicine ant: Use of <sup>1</sup>H and <sup>13</sup>C NMR in their conformational analysis. *J Nat Prod* 62:5-21.
17. Darst CR & Cummings ME (2006) Predator learning favours mimicry of a less-toxic model in poison frogs. *Nature* 440(7081):208-211.
18. Saporito RA, Spande TF, Garraffo HM, & Donnelly MA (2009) Arthropod alkaloids in poison frogs: A review of the 'dietary hypothesis'. *Heterocycles* 79(1):277-297.
19. Myers CW & Burrowes PA (1987) A new poison frog (*Dendrobates*) from Andean Colombia, with notes on a lowland relative. *America Museum Novitates* 2899:1-17.
20. Myers CW, Paolillo A, & Daly JW (1991) Discovery of a defensively malodorous and nocturnal frog in the family Dendrobatidae: phylogenetic significance of a new genus and species from the venezuelan Andes. *Am Mus Novit* 3002:1-33.
21. Poulin B, *et al.* (2001) Avian predation upon lizards and frogs in a neotropical forest understorey. *Journal of Tropical Ecology* 17(1):21-40.

Table S2. Binary coloration classification and composite conspicuousness (i.e., total contrast score TCS or  $\Sigma S_i$  measured as the sum of all binary  $S_i$  points) of the species of poison frogs included in the analysis. Description of coloration is based on specimen descriptions from the literature, as well as from scoring of photographs of live animals. Nomenclature of the regions in the male frog's body is provided in the Fig. S3.

| Genus            | Species                 | Phy ID | Dorsal Background (a) |   | Dorsal Stripe (b) |   | Dorsolateral Stripe (c) |   | Lateral Background (d) |   | Ventrolateral Stripe (e) |   | Oblique Lateral Stripe (f) |    | Arm Dorsal (g) |      | Flash Mark (h) |    | Thigh Dorsal (i) |      | Throat (j) |    | Abdomen (k) |    | $\Sigma S_i$ | Ref           |             |             |        |
|------------------|-------------------------|--------|-----------------------|---|-------------------|---|-------------------------|---|------------------------|---|--------------------------|---|----------------------------|----|----------------|------|----------------|----|------------------|------|------------|----|-------------|----|--------------|---------------|-------------|-------------|--------|
|                  |                         |        | Color                 | S | Color             | S | Color                   | S | Color                  | S | Color                    | S | Color                      | S  | Color          | S    | Color          | S  | Color            | S    | Color      | S  | Color       | S  |              |               | Color       | S           |        |
| <i>Allobates</i> | <i>algorei</i>          | 60     | D-Br                  | 0 | --                | 0 | L-Br                    | 0 | D-Br                   | 0 | Cr                       | 1 | L-Br                       | 0  | Br             | 0    | --             | 0  | D-Br             | 0    | Gray       | 0  | Cr          | 1  | 2            | (1), Obs      |             |             |        |
| <i>Allobates</i> | <i>brunneus</i>         | 37     | Br                    | 0 | --                | 0 | --                      | 0 | D-Br                   | 0 | Cr                       | 1 | Or                         | Br | 1              | L-Br | 0              | -- | 0                | D-Br | 0          | Y  | 1           | Y  | 1            | 4             | (2, 3), Obs |             |        |
| <i>Allobates</i> | <i>caeruleodactylus</i> | 48     | L-Br                  | 0 | --                | 0 | --                      | 0 | D-Br                   | 0 | Cr                       | 1 | --                         | 0  | L-Br           | 0    | --             | 0  | L-Br             | 0    | Bl         | 0  | Cr          | 1  | 2            | (4), Obs      |             |             |        |
| <i>Allobates</i> | <i>crombiei</i>         | 52     | Br                    | 0 | --                | 0 | D-Br                    | 0 | D-Br                   | 0 | Cr                       | 1 | --                         | 0  | Br             | 0    | --             | 0  | Br               | 0    | Wh         | 1  | Wh          | 1  | 3            | (3)           |             |             |        |
| <i>Allobates</i> | <i>femorialis</i>       | 43     | Bl                    | 0 | --                | 0 | Y                       | 1 | Bl                     | 0 | Wh                       | 1 | Wh                         | 1  | L-Br           | Y    | 1              | -- | 0                | D-Br | 0          | Bl | 0           | Wh | Bl           | 1             | 5           | (5, 6), Obs |        |
| <i>Allobates</i> | <i>femorialis</i>       | 46     | Bl                    | 0 | --                | 0 | Y                       | 1 | Bl                     | 0 | Wh                       | 1 | Wh                         | 1  | L-Br           | Y    | 1              | -- | 0                | D-Br | 0          | Bl | 0           | Wh | Bl           | 1             | 5           | (6-8)       |        |
| <i>Allobates</i> | <i>femorialis</i>       | 44     | Bl                    | 0 | --                | 0 | Y                       | 1 | Bl                     | 0 | Wh                       | 1 | Wh                         | 1  | L-Br           | Y    | 1              | -- | 0                | D-Br | 0          | Bl | 0           | Wh | Bl           | 1             | 5           | (6-8)       |        |
| <i>Allobates</i> | <i>femorialis</i>       | 40     | Bl                    | 0 | --                | 0 | Y                       | 1 | Bl                     | 0 | Wh                       | 1 | Wh                         | 1  | L-Br           | Y    | 1              | -- | 0                | D-Br | Y          | 1  | Bl          | 0  | Wh           | Bl            | 1           | 6           | (6, 7) |
| <i>Allobates</i> | <i>femorialis</i>       | 41     | Bl                    | 0 | --                | 0 | Y                       | 1 | Bl                     | 0 | Wh                       | 1 | Wh                         | 1  | L-Br           | Y    | 1              | -- | 0                | D-Br | Y          | 1  | Bl          | 0  | Wh           | Bl            | 1           | 6           | (6-8)  |
| <i>Allobates</i> | <i>femorialis</i>       | 45     | Bl                    | 0 | --                | 0 | Y                       | 1 | Bl                     | 0 | Wh                       | 1 | Wh                         | 1  | L-Br           | Y    | 1              | -- | 0                | D-Br | Y          | 1  | Bl          | 0  | Wh           | Bl            | 1           | 6           | (6-8)  |
| <i>Allobates</i> | <i>granti</i>           | 49     | Br                    | 0 | --                | 0 | Br                      | 0 | D-Br                   | 0 | Cr                       | 1 | L-Br                       | 0  | Br             | 0    | --             | 0  | Br               | 0    | Gray       | 0  | Gray        | 0  | 1            | (9)           |             |             |        |
| <i>Allobates</i> | <i>humilis</i>          | 59     | D-Br                  | 0 | --                | 0 | D-Br                    | 0 | D-Br                   | 0 | Cr                       | 1 | --                         | 0  | Br             | 0    | --             | 0  | D-Br             | 0    | Gray       | 0  | Cr          | 1  | 2            | (1, 10), Obs  |             |             |        |
| <i>Allobates</i> | <i>insperatus</i>       | 54     | D-Br                  | 0 | --                | 0 | L-Br                    | 0 | D-Br                   | 0 | Cr                       | 1 | --                         | 0  | L-Br           | 0    | --             | 0  | L-Br             | 0    | Gray       | 0  | Cr          | 1  | 2            | (5), Obs      |             |             |        |
| <i>Allobates</i> | <i>aff. insperatus</i>  | 55     | Br                    | 0 | --                | 0 | L-Br                    | 0 | D-Br                   | 0 | Cr                       | 1 | --                         | 0  | L-Br           | 0    | --             | 0  | L-Br             | 0    | Gray       | 0  | Cr          | 1  | 2            | Obs           |             |             |        |
| <i>Allobates</i> | <i>juanii</i>           | 47     | Br                    | 0 | --                | 0 | L-Br                    | 0 | Bl                     | 0 | Cr                       | 1 | L-Br                       | 0  | L-Br           | 0    | --             | 0  | L-Br             | 0    | Gray       | 0  | Cr          | 1  | 2            | (11), Obs     |             |             |        |
| <i>Allobates</i> | <i>kingsburyi</i>       | 39     | D-Br                  | 0 | --                | 0 | L-Br                    | 0 | D-Br                   | 0 | Cr                       | 1 | --                         | 0  | L-Br           | 0    | --             | 0  | Br               | 0    | Gray       | 0  | Cr          | 1  | 2            | (12, 13), Obs |             |             |        |
| <i>Allobates</i> | <i>marchesianus</i>     | 50     | L-Br                  | 0 | --                | 0 | --                      | 0 | D-Br                   | 0 | Cr                       | 1 | --                         | 0  | L-Br           | 0    | --             | 0  | L-Br             | 0    | Bl         | 0  | Cr          | 1  | 2            | (3, 14)       |             |             |        |
| <i>Allobates</i> | <i>masniger</i>         | 58     | D-Br                  | 0 | --                | 0 | Br                      | 0 | D-Br                   | 0 | Cr                       | 1 | --                         | 0  | L-Br           | 0    | --             | 0  | D-Br             | 0    | Gray       | 0  | Gray        | 0  | 1            | (3)           |             |             |        |
| <i>Allobates</i> | <i>nidicola</i>         | 36     | Br                    | 0 | --                | 0 | --                      | 0 | D-Br                   | 0 | Wh                       | 1 | Wh                         | 1  | D-Br           | 0    | --             | 0  | D-Br             | 0    | Gray       | 0  | Gray        | 0  | 2            | (15)          |             |             |        |
| <i>Allobates</i> | <i>olfersioides</i>     | 1      | D-Br                  | 0 | --                | 0 | --                      | 0 | Bl                     | 0 | Wh                       | 1 | Wh                         | 1  | Br             | 0    | --             | 0  | Br               | 0    | L-Br       | 0  | Cr          | 1  | 3            | (13, 16)      |             |             |        |
| <i>Allobates</i> | <i>ornatus</i>          | 51     | L-Br                  | 0 | D-Br              | 0 | L-Br                    | 0 | D-Br                   | 0 | Cr                       | 1 | L-Br                       | 0  | L-Br           | 0    | --             | 0  | Br               | 0    | Gray       | 0  | Cr          | 1  | 2            | (17), Obs     |             |             |        |
| <i>Allobates</i> | <i>sp. Ducke</i>        | 61     | L-Br                  | 0 | D-Br              | 0 | L-Br                    | 0 | D-Br                   | 0 | Cr                       | 1 | L-Br                       | 0  | L-Br           | 0    | --             | 0  | Br               | 0    | Gray       | 0  | Cr          | 1  | 2            | (18), Obs     |             |             |        |
| <i>Allobates</i> | <i>sp. Neblina</i>      | 29     | --                    | - | --                | - | --                      | - | --                     | - | --                       | - | --                         | -  | --             | -    | --             | -  | --               | -    | --         | -  | --          | -  | --           | --            |             |             |        |

Color codes: Black (Bl), blue (B), brown (Br), cream (Cr), dark brown (D-Br), gray (Gray), green (Gr), light brown (L-Br), light green (L-Gr), light yellow (L-Y), orange (Or), red (R), yellow (Y), and white (Wh).



Table S2 (Cont.) Binary coloration classification and composite conspicuousness (i.e., total contrast score TCS or  $\sum S_i$  measured as the sum of all binary  $S_i$  points) of the species of poison frogs included in the analysis. Description of coloration is based on specimen descriptions from the literature, as well as from scoring of photographs of live animals. Nomenclature of the regions in the male frog's body is provided in the Fig. S3.

| Genus            | Species                        | Phy ID | Dorsal Background (a) |   | Dorsal Stripe (b) |   | Dorsolateral Stripe (c) |    | Lateral Background (d) |    | Ventrolateral Stripe (e) |    | Oblique Lateral Stripe (f) |   | Arm Dorsal (g) |      | Flash Mark (h) |   | Thigh Dorsal (i) |      | Throat (j) |     | Abdomen (k) |     | $\sum S_i$ | Ref                   |       |                         |                  |
|------------------|--------------------------------|--------|-----------------------|---|-------------------|---|-------------------------|----|------------------------|----|--------------------------|----|----------------------------|---|----------------|------|----------------|---|------------------|------|------------|-----|-------------|-----|------------|-----------------------|-------|-------------------------|------------------|
|                  |                                |        | Color                 | S | Color             | S | Color                   | S  | Color                  | S  | Color                    | S  | Color                      | S | Color          | S    | Color          | S | Color            | S    | Color      | S   | Color       | S   |            |                       | Color | S                       |                  |
| <i>Allobates</i> | <i>sp. Negro</i>               | 38     | Br                    | 0 | --                | 0 | L-Br                    | 0  | D-Br                   | 0  | Cr                       | 1  | --                         | 0 | L-Br           | 0    | --             | 0 | L-Br             | 0    | Gray       | 0   | Cr          | 1   | 2          | Obs                   |       |                         |                  |
| <i>Allobates</i> | <i>sp. Shushufindi</i>         | 53     | D-Br                  | 0 | --                | 0 | L-Br                    | 0  | D-Br                   | 0  | Cr                       | 1  | --                         | 0 | L-Br           | 0    | --             | 0 | L-Br             | 0    | Gray       | 0   | Cr          | 1   | 2          | Obs                   |       |                         |                  |
| <i>Allobates</i> | <i>sp. Treviso (sp. small)</i> | 57     | L-Br                  | 0 | D-Br              | 0 | L-Br                    | 0  | D-Br                   | 0  | Cr                       | 1  | L-Br                       | 0 | L-Br           | 0    | --             | 0 | Br               | 0    | Gray       | 0   | Cr          | 1   | 2          | Obs                   |       |                         |                  |
| <i>Allobates</i> | <i>talamancae</i>              | 34     | D-Br                  | 0 | --                | 0 | L-Br                    | 0  | Bl                     | 0  | Cr                       | 1  | --                         | 0 | L-Br           | 0    | --             | 0 | L-Br             | 0    | Bl         | 0   | Gray        | 0   | 1          | (12, 13, 19, 20), Obs |       |                         |                  |
| <i>Allobates</i> | <i>talamancae</i>              | 32     | D-Br                  | 0 | --                | 0 | L-Br                    | 0  | Bl                     | 0  | Cr                       | 1  | --                         | 0 | L-Br           | 0    | --             | 0 | L-Br             | 0    | Bl         | 0   | Gray        | 0   | 1          | (12, 13, 19, 20), Obs |       |                         |                  |
| <i>Allobates</i> | <i>talamancae</i>              | 35     | D-Br                  | 0 | --                | 0 | L-Br                    | 0  | Bl                     | 0  | Cr                       | 1  | --                         | 0 | L-Br           | 0    | --             | 0 | L-Br             | 0    | Bl         | 0   | Gray        | 0   | 1          | (12, 13, 19, 20), Obs |       |                         |                  |
| <i>Allobates</i> | <i>talamancae</i>              | 31     | D-Br                  | 0 | --                | 0 | L-Br                    | 0  | Bl                     | 0  | Cr                       | 1  | --                         | 0 | L-Br           | 0    | --             | 0 | L-Br             | 0    | Bl         | 0   | Gray        | 0   | 1          | (12, 13, 19, 20), Obs |       |                         |                  |
| <i>Allobates</i> | <i>talamancae</i>              | 33     | D-Br                  | 0 | --                | 0 | L-Br                    | 0  | Bl                     | 0  | Cr                       | 1  | --                         | 0 | L-Br           | 0    | --             | 0 | L-Br             | 0    | Bl         | 0   | Gray        | 0   | 1          | (12, 13, 19, 20), Obs |       |                         |                  |
| <i>Allobates</i> | <i>talamancae</i>              | 30     | D-Br                  | 0 | --                | 0 | L-Br                    | 0  | Bl                     | 0  | Cr                       | 1  | --                         | 0 | L-Br           | 0    | --             | 0 | L-Br             | 0    | Bl         | 0   | Gray        | 0   | 1          | (12, 13, 19, 20), Obs |       |                         |                  |
| <i>Allobates</i> | <i>trilineatus</i>             | 56     | D-Br                  | 0 | L-Br              | 0 | Br                      | 0  | D-Br                   | 0  | Wh                       | 1  | --                         | 0 | L-Br           | 0    | --             | 0 | D-Br             | 0    | Gray       | 0   | Cr          | 1   | 2          | (13, 21)              |       |                         |                  |
| <i>Allobates</i> | <i>zaparo</i>                  | 42     | R                     | 1 | --                | 0 | R                       | Cr | 1                      | Bl | 0                        | Bl | 0                          | B | 1              | L-Br | Y              | 1 | Y                | 1    | Gray       | 0   | Bl          | 0   | Wh         | Bl                    | 1     | 6                       | (6, 22, 23), Obs |
| <i>Ameerega</i>  | <i>altamazonica</i>            | 103    | D-Br                  | 0 | --                | 0 | Bl                      | 0  | Bl                     | 0  | B                        | 1  | Cr                         | 1 | D-Br           | 0    | Y              | 1 | D-Br             | 0    | B          | Bl  | 1           | B   | Bl         | 1                     | 5     | (24), Obs               |                  |
| <i>Ameerega</i>  | <i>bassleri</i>                | 89     | Y/Or                  | 1 | --                | 0 | Y/Or                    | 1  | Bl                     | 0  | Cr                       | 1  | Y/Or                       | 1 | Y              | 1    | --             | 0 | Y                | 1    | Bl         | 0   | Bl          | 0   | 6          | (6, 22, 25, 26), Obs  |       |                         |                  |
| <i>Ameerega</i>  | <i>bilinguis</i>               | 87     | R                     | 1 | --                | 0 | Bl                      | 0  | Bl                     | 0  | B                        | 1  | B                          | 1 | Gray           | Y    | 1              | Y | 1                | Gray | 0          | B   | Bl          | 1   | B          | Bl                    | 1     | 7                       | (22, 23), Obs    |
| <i>Ameerega</i>  | <i>braccata</i>                | 94     | Bl                    | 0 | L-Y               | 1 | Or                      | 1  | Bl                     | 0  | L-Y                      | 1  | L-Y                        | 1 | L-Y            | 1    | Or             | 1 | Bl               | L-Br | 0          | L-Y | 1           | L-Y | Gray       | 1                     | 8     | (22, 27), Obs           |                  |
| <i>Ameerega</i>  | <i>cainarachi</i>              | 102    | R/Or                  | 1 | --                | 0 | Bl                      | 0  | Bl                     | 0  | B                        | 1  | Y                          | 1 | Gray           | Y    | 1              | Y | 1                | Gray | B          | 1   | B           | 1   | B          | 1                     | 8     | (22, 23, 28), Obs       |                  |
| <i>Ameerega</i>  | <i>flavopicta</i>              | 95     | Bl                    | 0 | Cr                | 1 | Or                      | 1  | Bl                     | 0  | Y                        | 1  | Or                         | 1 | Y              | 1    | Or             | 1 | Bl               | L-Br | 0          | Y   | Gray        | 1   | Y          | Gray                  | 1     | 8                       | (22, 27)         |
| <i>Ameerega</i>  | <i>hahneli</i>                 | 96     | D-Br                  | 0 | --                | 0 | Bl                      | 0  | Bl                     | 0  | B                        | 1  | Cr                         | 1 | D-Br           | 0    | Y              | 1 | D-Br             | 0    | B          | Bl  | 1           | B   | Bl         | 1                     | 5     | (5, 22, 27), Obs        |                  |
| <i>Ameerega</i>  | <i>hahneli</i>                 | 97     | D-Br                  | 0 | --                | 0 | Bl                      | 0  | Bl                     | 0  | B                        | 1  | Cr                         | 1 | D-Br           | 0    | Y              | 1 | D-Br             | 0    | B          | Bl  | 1           | B   | Bl         | 1                     | 5     | (5, 22, 27), Obs        |                  |
| <i>Ameerega</i>  | <i>hahneli</i>                 | 98     | D-Br                  | 0 | --                | 0 | Bl                      | 0  | Bl                     | 0  | B                        | 1  | Cr                         | 1 | D-Br           | 0    | Y              | 1 | D-Br             | 0    | B          | Bl  | 1           | B   | Bl         | 1                     | 5     | (5, 22, 27), Obs        |                  |
| <i>Ameerega</i>  | <i>hahneli</i>                 | 99     | D-Br                  | 0 | --                | 0 | Bl                      | 0  | Bl                     | 0  | B                        | 1  | Cr                         | 1 | D-Br           | 0    | Y              | 1 | D-Br             | 0    | B          | Bl  | 1           | B   | Bl         | 1                     | 5     | (5, 22, 27), Obs        |                  |
| <i>Ameerega</i>  | <i>ignipedis</i>               | 90     | D-Br                  | 0 | --                | 0 | Bl                      | 0  | Bl                     | 0  | Cr                       | 1  | Y                          | 1 | L-Br           | Y    | 1              | Y | 1                | L-Br | 0          | B   | Bl          | 1   | B          | Bl                    | 1     | 6                       | (25, 28)         |
| <i>Ameerega</i>  | <i>parvula</i>                 | 86     | R                     | 1 | --                | 0 | Bl                      | 0  | Bl                     | 0  | B                        | 1  | B                          | 1 | Gray           | 0    | B              | 1 | Gray             | 0    | B          | Bl  | 1           | B   | Bl         | 1                     | 6     | (5, 6, 22, 23, 29), Obs |                  |

Color codes: Black (Bl), blue (B), brown (Br), cream (Cr), dark brown (D-Br), gray (Gray), green (Gr), light brown (L-Br), light green (L-Gr), light yellow (L-Y), orange (Or), red (R), yellow (Y), and white (Wh).

Table S2 (Cont.) Binary coloration classification and composite conspicuousness (i.e., total contrast score TCS or  $\Sigma S_i$  measured as the sum of all binary  $S_i$  points) of the species of poison frogs included in the analysis. Description of coloration is based on specimen descriptions from the literature, as well as from scoring of photographs of live animals. Nomenclature of the regions in the male frog's body is provided in the Fig. S3.

| Genus                 | Species                  | Phy ID | Dorsal Background (a) |      | Dorsal Stripe (b) |    | Dorsolateral Stripe (c) |    | Lateral Background (d) |      | Ventrolateral Stripe (e) |      | Oblique Lateral Stripe (f) |    | Arm Dorsal (g) |      | Flash Mark (h) |    | Thigh Dorsal (i) |      | Throat (j) |    | Abdomen (k) |      | $\Sigma S_i$ | Ref  |              |                   |               |             |
|-----------------------|--------------------------|--------|-----------------------|------|-------------------|----|-------------------------|----|------------------------|------|--------------------------|------|----------------------------|----|----------------|------|----------------|----|------------------|------|------------|----|-------------|------|--------------|------|--------------|-------------------|---------------|-------------|
|                       |                          |        | Color                 | S    | Color             | S  | Color                   | S  | Color                  | S    | Color                    | S    | Color                      | S  | Color          | S    | Color          | S  | Color            | S    | Color      | S  | Color       | S    |              |      |              |                   |               |             |
| <i>Ameerega</i>       | <i>petersi</i>           | 101    | Br                    | 0    | --                | 0  | Bl                      | 0  | Bl                     | 0    | L-Gr                     | 1    | L-Gr                       | 1  | Br             | 0    | L-Gr           | 1  | Br               | 0    | L-Gr       | 1  | L-Gr        | Bl   | 1            | 5    | (22, 25, 28) |                   |               |             |
| <i>Ameerega</i>       | <i>picta</i>             | 91     | D-Br                  | 0    | --                | 0  | Bl                      | 0  | Bl                     | 0    | Cr                       | 1    | Y                          | 1  | Br             | Y    | 1              | Or | 1                | Br   | 0          | Bl | 0           | Bl   | Y            | 1    | 5            | (22, 27, 28)      |               |             |
| <i>Ameerega</i>       | <i>picta</i>             | 92     | D-Br                  | 0    | --                | 0  | Bl                      | 0  | Bl                     | 0    | Cr                       | 1    | Y                          | 1  | Br             | Y    | 1              | Or | 1                | Br   | 0          | Bl | 0           | Bl   | Y            | 1    | 5            | (22, 27, 28), Obs |               |             |
| <i>Ameerega</i>       | <i>picta</i>             | 93     | D-Br                  | 0    | --                | 0  | Bl                      | 0  | Bl                     | 0    | Cr                       | 1    | Y                          | 1  | Br             | Y    | 1              | Or | 1                | Br   | 0          | Bl | 0           | Bl   | Y            | 1    | 5            | (22, 27, 28)      |               |             |
| <i>Ameerega</i>       | <i>pongoensis</i>        | 88     | Bl                    | L-Gr | 1                 | -- | 0                       | Bl | 0                      | L-Gr | 1                        | L-Gr | 1                          | Bl | 0              | Gray | 0              | B  | 1                | Gray | B          | 1  | B           | 1    | Gray         | B    | 1            | 7                 | (22, 28), Obs |             |
| <i>Ameerega</i>       | <i>silverstonei</i>      | 85     | Or                    | Bl   | 1                 | -- | 0                       | -- | 0                      | Or   | Bl                       | 1    | Bl                         | 0  | --             | 0    | Or             | 1  | --               | 0    | Or         | Bl | 1           | Or   | Bl           | 1    | 6            | (22, 28, 30)      |               |             |
| <i>Ameerega</i>       | <i>smaragdina</i>        | 100    | Br                    | L-Gr | 1                 | -- | 0                       | Bl | 0                      | L-Gr | 1                        | L-Gr | 1                          | Bl | 0              | L-Gr | 1              | -- | 0                | Gray | L-Gr       | 1  | Gray        | L-Gr | 1            | Gray | L-Gr         | 1                 | 7             | (6, 22, 28) |
| <i>Ameerega</i>       | <i>trivittata</i>        | 105    | Bl                    | 0    | L-Gr              | 1  | L-Gr                    | 1  | Bl                     | 0    | L-Gr                     | 1    | L-Gr                       | 1  | L-Gr           | 1    | --             | 0  | L-Gr             | 1    | Bl         | 0  | Bl          | 0    | Bl           | 0    | 6            | (6, 22, 28), Obs  |               |             |
| <i>Ameerega</i>       | <i>trivittata</i>        | 107    | L-Gr                  | 1    | --                | 0  | L-Gr                    | 1  | Bl                     | 0    | L-Gr                     | 1    | L-Gr                       | 1  | L-Gr           | 1    | --             | 0  | L-Gr             | 1    | Bl         | 0  | Bl          | 0    | Bl           | 0    | 6            | (6, 22, 28), Obs  |               |             |
| <i>Ameerega</i>       | <i>trivittata</i>        | 106    | L-Gr                  | 1    | L-Gr              | 1  | L-Gr                    | 1  | Bl                     | 0    | L-Gr                     | 1    | --                         | 0  | L-Gr           | 1    | --             | 0  | L-Gr             | 1    | Bl         | 0  | Bl          | 0    | Bl           | 0    | 6            | (6, 22, 28), Obs  |               |             |
| <i>Ameerega</i>       | <i>trivittata</i>        | 104    | Bl                    | 0    | L-Gr              | 1  | L-Gr                    | 1  | Bl                     | 0    | L-Gr                     | 1    | L-Gr                       | 1  | L-Gr           | 1    | --             | 0  | L-Gr             | 1    | Bl         | 0  | Bl          | 0    | Bl           | 0    | 6            | (6, 22, 28), Obs  |               |             |
| <i>Anomaloglossus</i> | <i>baeobatrachus</i>     | 3      | Br                    | 0    | --                | 0  | D-Br                    | 0  | D-Br                   | 0    | Wh                       | 1    | Wh                         | 1  | Br             | 0    | --             | 0  | D-Br             | 0    | Gray       | 0  | Gray        | 0    | Gray         | 0    | 2            | (31)              |               |             |
| <i>Anomaloglossus</i> | <i>degravellei</i>       | 4      | Br                    | 0    | --                | 0  | D-Br                    | 0  | D-Br                   | 0    | Wh                       | 1    | Cr                         | 1  | D-Br           | 0    | --             | 0  | D-Br             | 0    | Gray       | 0  | Gray        | 0    | Gray         | 0    | 2            | (31)              |               |             |
| <i>Anomaloglossus</i> | <i>rufulus</i>           | 5      | D-Br                  | 0    | --                | 0  | --                      | 0  | D-Br                   | 0    | --                       | 0    | --                         | 0  | D-Br           | 0    | --             | 0  | D-Br             | 0    | D-Br       | 0  | D-Br        | 0    | Gray         | Y    | 1            | 1                 | (22, 32), Obs |             |
| <i>Anomaloglossus</i> | <i>verbeeksnyderorum</i> | 2      | Br                    | 0    | --                | 0  | D-Br                    | 0  | D-Br                   | 0    | Cr                       | 1    | Cr                         | 1  | L-Br           | 0    | Y              | 1  | L-Br             | 0    | Gray       | 0  | Gray        | 0    | Gray         | 0    | 3            | (33), Obs         |               |             |
| <i>Aromobates</i>     | <i>meridensis</i>        | 7      | Bl                    | 0    | Bl                | 0  | --                      | 0  | Bl                     | 0    | --                       | 0    | --                         | 0  | Bl             | 0    | --             | 0  | Bl               | 0    | Gray       | 0  | Y           | 1    | Y            | 1    | 1            | (34), Obs         |               |             |
| <i>Aromobates</i>     | <i>saluensis</i>         | 11     | D-Br                  | 0    | --                | 0  | Cr                      | 1  | D-Br                   | 0    | Wh                       | 1    | Wh                         | 1  | Br             | 0    | Y              | 1  | D-Br             | 0    | Gray       | 0  | Gray        | 0    | Cr           | 1    | 5            | Obs               |               |             |
| <i>Aromobates</i>     | <i>cannatellai</i>       | 9      | Br                    | 0    | --                | 0  | Cr                      | 1  | Br                     | 0    | Cr                       | 1    | Wh                         | 1  | L-Br           | 0    | Y              | 1  | Br               | 0    | Gray       | 0  | Gray        | 0    | Gray         | 0    | 4            | Obs               |               |             |
| <i>Aromobates</i>     | aff. <i>saluensis</i>    | 10     | Br                    | 0    | --                | 0  | Cr                      | 1  | Br                     | 0    | Cr                       | 1    | Wh                         | 1  | L-Br           | 0    | --             | 0  | Br               | 0    | Gray       | 0  | Gray        | 0    | Gray         | 0    | 3            | Obs               |               |             |
| <i>Aromobates</i>     | <i>ericksonae</i>        | 8      | Br                    | 0    | --                | 0  | Cr                      | 1  | D-Br                   | 0    | Wh                       | 1    | Wh                         | 1  | L-Br           | 0    | --             | 0  | L-Br             | 0    | Gray       | 0  | Gray        | 0    | Cr           | 1    | 4            | Obs               |               |             |
| <i>Aromobates</i>     | <i>ornatissimus</i>      | 6      | Br                    | 0    | Bl                | 0  | Bl                      | 0  | Br                     | 0    | Wh                       | 1    | --                         | 0  | L-Br           | 0    | --             | 0  | Br               | 0    | Gray       | 0  | Gray        | 0    | Cr           | 1    | 2            | (35), Obs         |               |             |
| <i>Colostethus</i>    | <i>argyrogaster</i>      | 83     | D-Br                  | 0    | --                | 0  | Bl                      | 0  | Bl                     | 0    | Cr                       | 1    | Cr                         | 1  | L-Br           | 0    | --             | 0  | D-Br             | 0    | Cr         | 1  | Cr          | 1    | Cr           | 1    | 4            | (17), Obs         |               |             |
| <i>Colostethus</i>    | <i>fraterdanieli</i>     | 81     | Br                    | 0    | --                | 0  | D-Br                    | 0  | D-Br                   | 0    | Cr                       | 1    | Cr                         | 1  | L-Br           | 0    | Y              | 1  | Br               | 0    | Cr         | 1  | Cr          | 1    | Cr           | 1    | 5            | (36), Obs         |               |             |

Color codes: Black (Bl), blue (B), brown (Br), cream (Cr), dark brown (D-Br), gray (Gray), green (Gr), light brown (L-Br), light green (L-Gr), light yellow (L-Y), orange (Or), red (R), yellow (Y), and white (Wh).

Table S2 (Cont.) Binary coloration classification and composite conspicuousness (i.e., total contrast score TCS or  $\Sigma S_i$  measured as the sum of all binary  $S_i$  points) of the species of poison frogs included in the analysis. Description of coloration is based on specimen descriptions from the literature, as well as from scoring of photographs of live animals. Nomenclature of the regions in the male frog's body is provided in the Fig. S3.

| Genus              | Species                  | Phy ID | Dorsal Background (a) |      | Dorsal Stripe (b) |      | Dorsolateral Stripe (c) |    | Lateral Background (d) |      | Ventrolateral Stripe (e) |      | Oblique Lateral Stripe (f) |    | Arm Dorsal (g) |      | Flash Mark (h) |    | Thigh Dorsal (i) |    | Throat (j) |      | Abdomen (k) |      | $\Sigma S_i$ | Ref           |      |               |               |                       |                   |
|--------------------|--------------------------|--------|-----------------------|------|-------------------|------|-------------------------|----|------------------------|------|--------------------------|------|----------------------------|----|----------------|------|----------------|----|------------------|----|------------|------|-------------|------|--------------|---------------|------|---------------|---------------|-----------------------|-------------------|
|                    |                          |        | Color                 | S    | Color             | S    | Color                   | S  | Color                  | S    | Color                    | S    | Color                      | S  | Color          | S    | C              | S  | Color            | S  | Color      | S    | Color       | S    |              |               |      |               |               |                       |                   |
| <i>Colostethus</i> | <i>fraterdanieli</i>     | 82     | Br                    | 0    | --                | 0    | D-Br                    | 0  | D-Br                   | 0    | Cr                       | 1    | Cr                         | 1  | L-Br           | 0    | Y              | 1  | Br               | 0  | Cr         | 1    | Cr          | 1    | 5            | (36), Obs     |      |               |               |                       |                   |
| <i>Colostethus</i> | <i>fugax</i>             | 84     | L-Br                  | 0    | --                | 0    | D-Br                    | 0  | D-Br                   | 0    | Cr                       | 1    | Cr                         | 1  | L-Br           | 0    | --             | 0  | L-Br             | 0  | Gray       | 0    | Cr          | 1    | 3            | Obs           |      |               |               |                       |                   |
| <i>Colostethus</i> | <i>panamansis</i>        | 76     | Br                    | 0    | --                | 0    | D-Br                    | 0  | D-Br                   | 0    | Cr                       | 1    | Y                          | 1  | L-Br           | 0    | Y              | 1  | Br               | 0  | Cr         | 1    | Cr          | 1    | 5            | (20), Obs     |      |               |               |                       |                   |
| <i>Colostethus</i> | <i>panamansis</i>        | 75     | Br                    | 0    | --                | 0    | D-Br                    | 0  | D-Br                   | 0    | Cr                       | 1    | Y                          | 1  | L-Br           | 0    | Y              | 1  | Br               | 0  | Cr         | 1    | Cr          | 1    | 5            | (20), Obs     |      |               |               |                       |                   |
| <i>Colostethus</i> | <i>pratti</i>            | 80     | L-Br                  | 0    | --                | 0    | D-Br                    | 0  | D-Br                   | 0    | Cr                       | 1    | Cr                         | 1  | L-Br           | 0    | --             | 0  | L-Br             | 0  | Gray       | 0    | Cr          | 1    | 3            | (19), Obs     |      |               |               |                       |                   |
| <i>Colostethus</i> | <i>pratti</i>            | 79     | L-Br                  | 0    | --                | 0    | D-Br                    | 0  | D-Br                   | 0    | Cr                       | 1    | Cr                         | 1  | L-Br           | 0    | --             | 0  | L-Br             | 0  | Gray       | 0    | Cr          | 1    | 3            | (19), Obs     |      |               |               |                       |                   |
| <i>Colostethus</i> | <i>pratti</i>            | 77     | L-Br                  | 0    | --                | 0    | D-Br                    | 0  | D-Br                   | 0    | Cr                       | 1    | Cr                         | 1  | L-Br           | 0    | --             | 0  | L-Br             | 0  | Gray       | 0    | Cr          | 1    | 3            | (19), Obs     |      |               |               |                       |                   |
| <i>Colostethus</i> | aff. <i>pratti</i>       | 78     | L-Br                  | 0    | --                | 0    | D-Br                    | 0  | D-Br                   | 0    | Cr                       | 1    | Cr                         | 1  | L-Br           | 0    | --             | 0  | L-Br             | 0  | Gray       | 0    | Cr          | 1    | 3            | Obs           |      |               |               |                       |                   |
| <i>Dendrobates</i> | <i>auratus</i>           | 116    | Bl                    | L-Gr | 1                 | --   | 0                       | -- | 0                      | Bl   | L-Gr                     | 1    | --                         | 0  | Bl             | L-Gr | 1              | -- | 0                | Bl | L-Gr       | 1    | Bl          | B    | 1            | Bl            | B    | 1             | 6             | (19, 20, 22, 37), Obs |                   |
| <i>Dendrobates</i> | <i>bombetes</i>          | 126    | R                     | Gray | 1                 | Gray | 0                       | R  | 1                      | Gray | 0                        | Cr   | 1                          | -- | 0              | Bl   | R              | 1  | --               | 0  | Bl         | Wh   | 1           | Bl   | Wh           | 1             | 6    | (22, 38), Obs |               |                       |                   |
| <i>Dendrobates</i> | <i>captivus</i>          | 125    | Bl                    | Or   | 1                 | --   | 0                       | Or | 1                      | Bl   | 0                        | --   | 0                          | -- | 0              | Bl   | Y              | 1  | Y                | 1  | Bl         | Y    | 1           | Bl   | Y            | 1             | 6    | Obs           |               |                       |                   |
| <i>Dendrobates</i> | <i>castaneoticus</i>     | 114    | Bl                    | Cr   | 1                 | Cr   | 1                       | Bl | 0                      | --   | 0                        | Cr   | 1                          | Bl | Or             | 1    | Or             | 1  | Bl               | Or | 1          | Bl   | Cr          | 1    | Bl           | Or            | 1    | 8             | (22, 39)      |                       |                   |
| <i>Dendrobates</i> | <i>claudiae</i>          | 130    | Bl                    | --   | 0                 | Or   | 1                       | Bl | 0                      | Cr   | 1                        | Cr   | 1                          | Y  | 1              | Y    | 1              | Bl | 0                | Bl | 0          | Bl   | B           | 1    | 6            | (22, 40), Obs |      |               |               |                       |                   |
| <i>Dendrobates</i> | <i>defleri</i>           | 133    | Bl                    | Y    | 1                 | Bl   | 0                       | Bl | 0                      | L-Gr | 1                        | Y    | 1                          | Bl | Y              | B    | 1              | -- | 0                | Bl | B          | 1    | Bl          | Y    | 1            | Bl            | B    | 1             | 7             | (28, 41)              |                   |
| <i>Dendrobates</i> | <i>fantasticus</i>       | 137    | Bl                    | Or   | B                 | 1    | --                      | 0  | --                     | 0    | Bl                       | L-Gr | 1                          | -- | 0              | Bl   | L-Gr           | 1  | --               | 0  | Bl         | L-Gr | 1           | Bl   | Or           | 1             | Bl   | B             | 1             | 6                     | (22, 28, 41), Obs |
| <i>Dendrobates</i> | <i>galactonotus</i>      | 113    | Or                    | 1    | --                | 0    | Or                      | 1  | Or                     | 1    | --                       | 0    | --                         | 0  | Bl             | Or   | 1              | Or | 1                | Bl | Or         | 1    | Bl          | 0    | Bl           | 0             | 6    | (22, 37), Obs |               |                       |                   |
| <i>Dendrobates</i> | <i>granuliferus</i>      | 119    | R                     | L-Gr | 1                 | --   | 0                       | -- | 0                      | L-Gr | 1                        | --   | 0                          | -- | 0              | L-Gr | Gray           | 1  | --               | 0  | L-Gr       | Gray | 1           | L-Gr | 1            | L-Gr          | Gray | 1             | 6             | (22, 37, 42), Obs     |                   |
| <i>Dendrobates</i> | <i>histrionicus</i>      | 121    | Bl                    | R    | 1                 | --   | 0                       | -- | 0                      | Bl   | R                        | 1    | --                         | 0  | Bl             | R    | 1              | -- | 0                | Bl | R          | 1    | Bl          | R    | 1            | Bl            | R    | 1             | 6             | (22, 28, 37, 43), Obs |                   |
| <i>Dendrobates</i> | <i>imitator</i>          | 131    | Bl                    | Y    | 1                 | --   | 0                       | -- | 0                      | Bl   | Y                        | 1    | --                         | 0  | Bl             | B    | 1              | -- | 0                | Bl | B          | 1    | Bl          | Or   | 1            | Bl            | Or   | 1             | 6             | (22, 28, 41, 44), Obs |                   |
| <i>Dendrobates</i> | <i>lamasi (sirensis)</i> | 132    | Bl                    | 0    | L-Gr              | 1    | Y                       | 1  | Bl                     | 0    | L-Gr                     | 1    | Y                          | 1  | Bl             | L-Gr | 1              | -- | 0                | Bl | L-Gr       | 1    | Bl          | L-Gr | 1            | Bl            | L-Gr | 1             | 8             | (22, 28, 41, 45), Obs |                   |
| <i>Dendrobates</i> | <i>leucomelas</i>        | 118    | Bl                    | Y    | 1                 | Bl   | Y                       | 1  | --                     | 0    | Bl                       | Y    | 1                          | -- | 0              | Bl   | Y              | 1  | Y                | 1  | Bl         | Y    | 1           | Bl   | 0            | Bl            | 0    | 6             | (22, 37), Obs |                       |                   |
| <i>Dendrobates</i> | <i>minutus</i>           | 128    | Or                    | Gray | 1                 | Gray | 0                       | Or | 1                      | Bl   | 0                        | B    | 1                          | Or | 1              | Y    | 1              | Or | 1                | Bl | B          | 1    | Bl          | B    | 1            | Bl            | B    | 1             | 9             | (20, 22, 37), Obs     |                   |
| <i>Dendrobates</i> | <i>mysteriosus</i>       | 124    | R                     | Wh   | 1                 | --   | 0                       | -- | 0                      | R    | Wh                       | 1    | --                         | 0  | R              | Wh   | 1              | -- | 0                | R  | Wh         | 1    | R           | Wh   | 1            | R             | Wh   | 1             | 6             | (22, 28, 46), Obs     |                   |

Color codes: Black (Bl), blue (B), brown (Br), cream (Cr), dark brown (D-Br), gray (Gray), green (Gr), light brown (L-Br), light green (L-Gr), light yellow (L-Y), orange (Or), red (R), yellow (Y), and white (Wh).

Table S2 (Cont.) Binary coloration classification and composite conspicuousness (i.e., total contrast score TCS or  $\Sigma S_i$  measured as the sum of all binary  $S_i$  points) of the species of poison frogs included in the analysis. Description of coloration is based on specimen descriptions from the literature, as well as from scoring of photographs of live animals. Nomenclature of the regions in the male frog's body is provided in the Fig. S3.

| Genus               | Species                     | Phy ID | Dorsal Background (a) |      | Dorsal Stripe (b) |      | Dorsolateral Stripe (c) |    | Lateral Background (d) |      | Ventrolateral Stripe (e) |    | Oblique Lateral Stripe (f) |    | Arm Dorsal (g) |    | Flash Mark (h) |    | Thigh Dorsal (i) |      | Throat (j) |    | Abdomen (k) |    | $\Sigma S_i$ | Ref           |           |                   |               |                      |                          |                   |
|---------------------|-----------------------------|--------|-----------------------|------|-------------------|------|-------------------------|----|------------------------|------|--------------------------|----|----------------------------|----|----------------|----|----------------|----|------------------|------|------------|----|-------------|----|--------------|---------------|-----------|-------------------|---------------|----------------------|--------------------------|-------------------|
|                     |                             |        | Color                 | S    | Color             | S    | Color                   | S  | Color                  | S    | Color                    | S  | Color                      | S  | Color          | S  | C              | S  | Color            | S    | Color      | S  | Color       | S  |              |               |           |                   |               |                      |                          |                   |
| <i>Dendrobates</i>  | <i>pumilio</i>              | 123    | R                     | 1    | --                | 0    | --                      | 0  | R                      | 1    | --                       | 0  | --                         | 0  | R              | 1  | --             | 0  | R                | 1    | R          | 1  | R           | 1  | 6            | (22, 37), Obs |           |                   |               |                      |                          |                   |
| <i>Dendrobates</i>  | <i>pumilio</i>              | 122    | R                     | 1    | --                | 0    | --                      | 0  | R                      | 1    | --                       | 0  | --                         | 0  | R              | 1  | --             | 0  | R                | 1    | R          | 1  | R           | 1  | 6            | (22, 37), Obs |           |                   |               |                      |                          |                   |
| <i>Dendrobates</i>  | <i>reticulatus</i>          | 136    | R                     | 1    | --                | 0    | --                      | 0  | Bl                     | B    | 1                        | -- | 0                          | -- | 0              | Bl | B              | 1  | Bl               | B    | 1          | R  | 1           | Bl | B            | 1             | 6         | (22, 28, 41), Obs |               |                      |                          |                   |
| <i>Dendrobates</i>  | <i>sp. Quibdo</i>           | 129    | Or                    | Gray | 1                 | Gray | 0                       | Or | 1                      | Bl   | 0                        | B  | 1                          | Or | 1              | Or | 1              | Y  | 1                | Or   | 1          | Bl | B           | 1  | Bl           | B             | 1         | 9                 | Obs           |                      |                          |                   |
| <i>Dendrobates</i>  | <i>sylvaticus</i>           | 120    | Bl                    | R    | 1                 | --   | 0                       | -- | 0                      | Bl   | R                        | 1  | --                         | 0  | --             | 0  | Bl             | R  | 1                | Bl   | R          | 1  | Bl          | R  | 1            | Bl            | R         | 1                 | 6             | (22, 43, 47), Obs    |                          |                   |
| <i>Dendrobates</i>  | <i>tinctorius</i>           | 117    | Bl                    | Y    | B                 | 1    | --                      | 0  | --                     | 0    | Bl                       | Y  | B                          | 1  | --             | 0  | --             | 0  | Bl               | B    | 1          | Bl | B           | 1  | Bl           | B             | 1         | 6                 | (22, 37), Obs |                      |                          |                   |
| <i>Dendrobates</i>  | <i>truncatus</i>            | 115    | Bl                    | 0    | --                | 0    | Y                       | 1  | Bl                     | 0    | Y                        | 1  | --                         | 0  | Bl             | 0  | Y              | 1  | Bl               | 0    | Y          | 1  | Bl          | 0  | Y            | 1             | 6         | (22, 37), Obs     |               |                      |                          |                   |
| <i>Dendrobates</i>  | <i>uakarii</i>              | 138    | Bl                    | 0    | R                 | 1    | R                       | 1  | Bl                     | 0    | Y                        | 1  | --                         | 0  | Bl             | Y  | B              | 1  | Y                | 1    | Bl         | B  | 1           | Bl | Y            | 1             | Bl        | B                 | 1             | 8                    | (22, 28, 48)             |                   |
| <i>Dendrobates</i>  | <i>variabilis</i>           | 135    | Bl                    | Y    | 1                 | --   | 0                       | -- | 0                      | Bl   | Y                        | 1  | --                         | 0  | --             | 0  | Bl             | B  | 1                | --   | 0          | Bl | B           | 1  | Bl           | Y             | 1         | Bl                | Y             | 1                    | 6                        | (22, 28, 41), Obs |
| <i>Dendrobates</i>  | <i>ventrimaculatus</i>      | 134    | Bl                    | 0    | Y                 | 1    | Y                       | 1  | Bl                     | 0    | Y                        | 1  | --                         | 0  | Bl             | Y  | B              | 1  | --               | 0    | Bl         | B  | 1           | Bl | Y            | 1             | Bl        | B                 | 1             | 7                    | (5, 22, 28, 29, 41), Obs |                   |
| <i>Dendrobates</i>  | <i>ventrimaculatus</i>      | 139    | Bl                    | 0    | Y                 | 1    | Y                       | 1  | Bl                     | 0    | Y                        | 1  | --                         | 0  | Bl             | Y  | B              | 1  | --               | 0    | Bl         | B  | 1           | Bl | Y            | 1             | Bl        | B                 | 1             | 7                    | (5, 22, 28, 29, 41), Obs |                   |
| <i>Dendrobates</i>  | <i>virolinensis</i>         | 127    | R                     | 1    | --                | 0    | --                      | 0  | R                      | 1    | Cr                       | 1  | --                         | 0  | Bl             | R  | 1              | -- | 0                | Bl   | 0          | Bl | Wh          | 1  | Bl           | Wh            | 1         | 6                 | (22, 49), Obs |                      |                          |                   |
| <i>Epipedobates</i> | <i>anthonyi</i>             | 71     | L-Gr                  | 1    | L-Gr              | 1    | Br                      | 0  | Br                     | 0    | L-Gr                     | 1  | L-Gr                       | 1  | L-Gr           | Br | 1              | Or | 1                | L-Gr | R          | 1  | L-Gr        | R  | 1            | L-Gr          | R         | 1                 | 9             | (6, 22, 28, 50), Obs |                          |                   |
| <i>Epipedobates</i> | <i>anthonyi</i>             | 70     | L-Gr                  | 1    | L-Gr              | 1    | R                       | 1  | R                      | 1    | L-Gr                     | 1  | L-Gr                       | 1  | L-Gr           | R  | 1              | Or | 1                | L-Gr | R          | 1  | L-Gr        | R  | 1            | L-Gr          | R         | 1                 | 11            | (6, 22, 28, 50), Obs |                          |                   |
| <i>Epipedobates</i> | <i>boulengeri</i>           | 67     | Br                    | 0    | --                | 0    | Bl                      | 0  | Bl                     | 0    | Wh                       | 1  | Cr                         | 1  | Br             | 0  | --             | 0  | Br               | 0    | Gray       | Wh | 1           | Bl | Wh           | 1             | 4         | (6, 22), Obs      |               |                      |                          |                   |
| <i>Epipedobates</i> | <i>espinosai</i>            | 69     | Br                    | 0    | --                | 0    | Bl                      | 0  | Bl                     | 0    | Cr                       | 1  | Cr                         | 1  | Br             | 0  | --             | 0  | Br               | 0    | Gray       | Wh | 1           | Bl | Wh           | 1             | 4         | (6), Obs          |               |                      |                          |                   |
| <i>Epipedobates</i> | <i>machalilla</i>           | 73     | D-Br                  | 0    | --                | 0    | D-Br                    | 0  | D-Br                   | 0    | Cr                       | 1  | Cr                         | 1  | L-Br           | 0  | Y              | 1  | Br               | 0    | Gray       | 0  | Cr          | 1  | 4            | (12, 22), Obs |           |                   |               |                      |                          |                   |
| <i>Epipedobates</i> | <i>machalilla</i>           | 72     | D-Br                  | 0    | --                | 0    | D-Br                    | 0  | D-Br                   | 0    | Cr                       | 1  | Cr                         | 1  | L-Br           | 0  | Y              | 1  | Br               | 0    | Gray       | 0  | Cr          | 1  | 4            | (12, 22), Obs |           |                   |               |                      |                          |                   |
| <i>Epipedobates</i> | <i>sp. F darwinwallacei</i> | 68     | Br                    | Y    | 1                 | --   | 0                       | Br | 0                      | D-Br | 0                        | Y  | 1                          | Y  | 1              | Br | Y              | 1  | --               | 0    | Br         | Y  | 1           | Br | Y            | 1             | Br        | Y                 | 1             | 7                    | (6, 51), Obs             |                   |
| <i>Epipedobates</i> | <i>tricolor</i>             | 74     | L-Gr                  | 1    | L-Gr              | 1    | Br                      | 0  | L-Gr                   | 1    | L-Gr                     | 1  | L-Gr                       | 1  | L-Gr           | Br | 1              | Or | 1                | L-Gr | Br         | 1  | L-Gr        | Br | 1            | L-Gr          | Br        | 1                 | 10            | (6, 22), Obs         |                          |                   |
| <i>Hyloxalus</i>    | <i>sp. Agua Azul</i>        | 142    | Br                    | 0    | --                | 0    | L-Br                    | 0  | D-Br                   | 0    | Cr                       | 1  | L-Br                       | 0  | Br             | 0  | --             | 0  | Br               | 0    | Gray       | 0  | Cr          | 1  | 2            | Obs           |           |                   |               |                      |                          |                   |
| <i>Hyloxalus</i>    | <i>awa</i>                  | 171    | Br                    | 0    | --                | 0    | D-Br                    | 0  | D-Br                   | 0    | Cr                       | 1  | Cr                         | 1  | L-Br           | 0  | --             | 0  | L-Br             | 0    | Gray       | 0  | Gray        | Wh | 1            | 3             | (12), Obs |                   |               |                      |                          |                   |

Color codes: Black (Bl), blue (B), brown (Br), cream (Cr), dark brown (D-Br), gray (Gray), green (Gr), light brown (L-Br), light green (L-Gr), light yellow (L-Y), orange (Or), red (R), yellow (Y), and white (Wh).

Table S2 (Cont.) Binary coloration classification and composite conspicuousness (i.e., total contrast score TCS or  $\sum S_i$  measured as the sum of all binary  $S_i$  points) of the species of poison frogs included in the analysis. Description of coloration is based on specimen descriptions from the literature, as well as from scoring of photographs of live animals. Nomenclature of the regions in the male frog's body is provided in the Fig. S3.

| Genus            | Species                 | Phy ID | Dorsal Background (a) |   | Dorsal Stripe (b) |   | Dorsolateral Stripe (c) |   | Lateral Background (d) |   | Ventrolateral Stripe (e) |    | Oblique Lateral Stripe (f) |    | Arm Dorsal (g) |      | Flash Mark (h) |    | Thigh Dorsal (i) |      | Throat (j) |      | Abdomen (k) |      | $\sum S_i$ | Ref               |                  |                   |               |
|------------------|-------------------------|--------|-----------------------|---|-------------------|---|-------------------------|---|------------------------|---|--------------------------|----|----------------------------|----|----------------|------|----------------|----|------------------|------|------------|------|-------------|------|------------|-------------------|------------------|-------------------|---------------|
|                  |                         |        | Color                 | S | Color             | S | Color                   | S | Color                  | S | Color                    | S  | Color                      | S  | Color          | S    | Col            | S  | Color            | S    | Color      | S    | Color       | S    |            |                   | Color            | S                 |               |
| <i>Hyloxalus</i> | <i>azureiventris</i>    | 165    | Bl                    | 0 | --                | 0 | Or                      | 1 | Bl                     | 0 | B                        | 1  | Or                         | 1  | Or             | B    | 1              | B  | 1                | Bl   | B          | 1    | Bl          | B    | 1          | 8                 | (28, 52), Obs    |                   |               |
| <i>Hyloxalus</i> | <i>bocagei</i>          | 151    | D-Br                  | 0 | --                | 0 | --                      | 0 | D-Br                   | 0 | D-Br                     | 0  | Cr                         | 1  | D-Br           | Y    | 1              | -- | 0                | D-Br | 0          | Gray | 0           | Cr   | 1          | 3                 | (12, 53), Obs    |                   |               |
| <i>Hyloxalus</i> | <i>bocagei</i>          | 150    | D-Br                  | 0 | --                | 0 | --                      | 0 | D-Br                   | 0 | D-Br                     | 0  | Cr                         | 1  | D-Br           | Y    | 1              | -- | 0                | D-Br | 0          | Gray | 0           | Cr   | 1          | 3                 | (12, 53), Obs    |                   |               |
| <i>Hyloxalus</i> | <i>craspedoiceps</i>    | 166    | L-Br                  | 0 | --                | 0 | D-Br                    | 0 | L-Br                   | 0 | Cr                       | 1  | Cr                         | 1  | L-Br           | 0    | --             | 0  | L-Br             | 0    | Gray       | 0    | Cr          | 1    | 3          | (17), Obs         |                  |                   |               |
| <i>Hyloxalus</i> | aff. <i>delatorreae</i> | 163    | Br                    | 0 | --                | 0 | D-Br                    | 0 | Bl                     | 0 | Cr                       | 1  | Cr                         | 1  | L-Br           | 0    | --             | 0  | Br               | 0    | Gray       | 0    | Cr          | 1    | 3          | (54), Obs         |                  |                   |               |
| <i>Hyloxalus</i> | <i>delatorreae</i>      | 162    | Br                    | 0 | --                | 0 | D-Br                    | 0 | Bl                     | 0 | Cr                       | 1  | Cr                         | 1  | L-Br           | 0    | --             | 0  | Br               | 0    | Gray       | 0    | Cr          | 1    | 3          | (12, 54), Obs     |                  |                   |               |
| <i>Hyloxalus</i> | <i>elachyhistus</i>     | 169    | D-Br                  | 0 | --                | 0 | D-Br                    | 0 | D-Br                   | 0 | Cr                       | 1  | Cr                         | 1  | Br             | 0    | --             | 0  | D-Br             | 0    | Gray       | 0    | Cr          | 1    | 3          | (12, 13), Obs     |                  |                   |               |
| <i>Hyloxalus</i> | <i>elachyhistus</i>     | 168    | D-Br                  | 0 | --                | 0 | D-Br                    | 0 | D-Br                   | 0 | Cr                       | 1  | Cr                         | 1  | Br             | 0    | --             | 0  | D-Br             | 0    | Gray       | 0    | Cr          | 1    | 3          | (12, 13), Obs     |                  |                   |               |
| <i>Hyloxalus</i> | <i>erythromos</i>       | 140    | D-Br                  | 0 | --                | 0 | Br                      | 0 | D-Br                   | 0 | D-Br                     | 0  | L-Br                       | 0  | L-Br           | 0    | --             | 0  | D-Br             | 0    | Bl         | Wh   | 1           | Bl   | Wh         | 1                 | 2                | (22, 55, 56), Obs |               |
| <i>Hyloxalus</i> | <i>infraguttatus</i>    | 170    | Br                    | 0 | --                | 0 | D-Br                    | 0 | D-Br                   | 0 | Cr                       | 1  | Cr                         | 1  | L-Br           | 0    | --             | 0  | L-Br             | 0    | Gray       | 0    | Cr          | 1    | 3          | (12, 13), Obs     |                  |                   |               |
| <i>Hyloxalus</i> | <i>insulatus</i>        | 167    | D-Br                  | 0 | --                | 0 | D-Br                    | 0 | D-Br                   | 0 | Cr                       | 1  | Cr                         | 1  | D-Br           | 0    | --             | 0  | D-Br             | 0    | Gray       | 0    | Cr          | 1    | 3          | (17), Obs         |                  |                   |               |
| <i>Hyloxalus</i> | <i>italoi</i>           | 144    | L-Br                  | 0 | --                | 0 | --                      | 0 | L-Br                   | 0 | Cr                       | 1  | L-Br                       | 0  | L-Br           | 0    | --             | 0  | L-Br             | 0    | Gray       | 0    | Cr          | 1    | 2          | (12, 53), Obs     |                  |                   |               |
| <i>Hyloxalus</i> | <i>jacobuspetersi</i>   | 152    | D-Br                  | 0 | --                | 0 | L-Br                    | 0 | D-Br                   | 0 | Cr                       | 1  | L-Br                       | 0  | L-Br           | 0    | --             | 0  | D-Br             | 0    | Gray       | 0    | Gray        | 0    | 1          | (12, 13), Obs     |                  |                   |               |
| <i>Hyloxalus</i> | <i>maculosus</i>        | 149    | D-Br                  | 0 | --                | 0 | --                      | 0 | D-Br                   | 0 | D-Br                     | 0  | D-Br                       | 0  | D-Br           | 0    | --             | 0  | D-Br             | 0    | Gray       | 0    | Cr          | 1    | 1          | (12, 53), Obs     |                  |                   |               |
| <i>Hyloxalus</i> | <i>sp. Negro</i>        | 164    | D-Br                  | 0 | --                | 0 | Br                      | 0 | D-Br                   | 0 | Cr                       | 1  | Cr                         | 1  | L-Br           | 0    | --             | 0  | L-Br             | 0    | Gray       | 0    | Cr          | 1    | 3          | Obs               |                  |                   |               |
| <i>Hyloxalus</i> | <i>nexipus</i>          | 154    | Gray                  | 0 | --                | 0 | Or                      | 1 | Gray                   | 0 | Gray                     | Cr | 1                          | Or | 1              | Gray | B              | 1  | --               | 0    | Gray       | B    | 1           | Gray | 0          | Cr                | 1                | 6                 | (12, 17), Obs |
| <i>Hyloxalus</i> | aff. <i>nexipus</i>     | 156    | Gray                  | 0 | --                | 0 | Or                      | 1 | Gray                   | 0 | Gray                     | Cr | 1                          | Or | 1              | Gray | B              | 1  | --               | 0    | Gray       | B    | 1           | Gray | 0          | Cr                | 1                | 6                 | (12, 17), Obs |
| <i>Hyloxalus</i> | aff. <i>nexipus</i>     | 155    | Gray                  | 0 | --                | 0 | Or                      | 1 | Gray                   | 0 | Gray                     | Cr | 1                          | Or | 1              | Gray | B              | 1  | --               | 0    | Gray       | B    | 1           | Gray | 0          | Cr                | 1                | 6                 | (12, 17), Obs |
| <i>Hyloxalus</i> | <i>pulchellus</i>       | 160    | D-Br                  | 0 | --                | 0 | D-Br                    | 0 | D-Br                   | 0 | Cr                       | 1  | L-Br                       | 0  | L-Br           | 0    | --             | 0  | Br               | 0    | Gray       | 0    | Cr          | 1    | 2          | (12, 13, 57), Obs |                  |                   |               |
| <i>Hyloxalus</i> | <i>pulchellus</i>       | 159    | D-Br                  | 0 | --                | 0 | D-Br                    | 0 | D-Br                   | 0 | Cr                       | 1  | L-Br                       | 0  | L-Br           | 0    | --             | 0  | Br               | 0    | Gray       | 0    | Cr          | 1    | 2          | (12, 13, 57), Obs |                  |                   |               |
| <i>Hyloxalus</i> | aff. <i>pulchellus</i>  | 161    | D-Br                  | 0 | --                | 0 | D-Br                    | 0 | D-Br                   | 0 | Cr                       | 1  | L-Br                       | 0  | L-Br           | 0    | --             | 0  | Br               | 0    | Gray       | 0    | Cr          | 1    | 2          | Obs               |                  |                   |               |
| <i>Hyloxalus</i> | cf. <i>pulcherrimus</i> | 153    | Gray                  | 0 | --                | 0 | D-Br                    | 0 | D-Br                   | 0 | D-Br                     | 0  | Wh                         | 1  | D-Br           | 0    | --             | 0  | D-Br             | 0    | Gray       | 0    | Cr          | 1    | 2          | (17)              |                  |                   |               |
| <i>Hyloxalus</i> | <i>sauli</i>            | 148    | D-Br                  | 0 | --                | 0 | --                      | 0 | D-Br                   | 0 | Cr                       | 1  | Cr                         | 1  | D-Br           | Y    | 1              | -- | 0                | D-Br | 0          | Gray | 0           | Cr   | 1          | 4                 | (5, 12, 53), Obs |                   |               |

Color codes: Black (Bl), blue (B), brown (Br), cream (Cr), dark brown (D-Br), gray (Gray), green (Gr), light brown (L-Br), light green (L-Gr), light yellow (L-Y), orange (Or), red (R), yellow (Y), and white (Wh).

Table S2 (Cont.) Binary coloration classification and composite conspicuousness (i.e., total contrast score TCS or  $\Sigma S_i$  measured as the sum of all binary  $S_i$  points) of the species of poison frogs included in the analysis. Description of coloration is based on specimen descriptions from the literature, as well as from scoring of photographs of live animals. Nomenclature of the regions in the male frog's body is provided in the Fig. S3.

| Genus              | Species              | Phy ID | Dorsal Background (a) |   | Dorsal Stripe (b) |   | Dorsolateral Stripe (c) |   | Lateral Background (d) |   | Ventrolateral Stripe (e) |   | Oblique Lateral Stripe (f) |   | Arm Dorsal (g) |      | Flash Mark (h) |    | Thigh Dorsal (i) |      | Throat (j) |      | Abdomen (k) |      | $\Sigma S_i$ | Ref           |           |
|--------------------|----------------------|--------|-----------------------|---|-------------------|---|-------------------------|---|------------------------|---|--------------------------|---|----------------------------|---|----------------|------|----------------|----|------------------|------|------------|------|-------------|------|--------------|---------------|-----------|
|                    |                      |        | Color                 | S | Color             | S | Color                   | S | Color                  | S | Color                    | S | Color                      | S | Color          | S    | Color          | S  | Color            | S    | Color      | S    | Color       | S    |              |               | Color     |
| <i>Hyloxalus</i>   | <i>sorditatus</i>    | 141    | D-Br                  | 0 | --                | 0 | --                      | 0 | D-Br                   | 0 | D-Br                     | 0 | --                         | 0 | D-Br           | 0    | --             | 0  | D-Br             | 0    | Gray       | 0    | Gray        | 0    | 0            | (17), Obs     |           |
| <i>Hyloxalus</i>   | <i>subpunctatus</i>  | 143    | Br                    | 0 | --                | 0 | L-Br                    | 0 | D-Br                   | 0 | Cr                       | 1 | L-Br                       | 0 | Br             | 0    | --             | 0  | Br               | 0    | Gray       | 0    | Cr          | 1    | 2            | (13), Obs     |           |
| <i>Hyloxalus</i>   | <i>toachi</i>        | 172    | Br                    | 0 | --                | 0 | D-Br                    | 0 | D-Br                   | 0 | Cr                       | 1 | Cr                         | 1 | Br             | 0    | --             | 0  | Br               | 0    | Gray       | 0    | Cr          | 1    | 3            | (12), Obs     |           |
| <i>Hyloxalus</i>   | <i>vertebralis</i>   | 157    | Br                    | 0 | L-Br              | 0 | L-Br                    | 0 | D-Br                   | 0 | D-Br                     | 0 | L-Br                       | 0 | L-Br           | 0    | --             | 0  | L-Br             | 0    | Gray       | 0    | Cr          | 1    | 1            | (12, 13), Obs |           |
| <i>Hyloxalus</i>   | <i>vertebralis</i>   | 158    | Br                    | 0 | L-Br              | 0 | L-Br                    | 0 | D-Br                   | 0 | D-Br                     | 0 | L-Br                       | 0 | L-Br           | 0    | --             | 0  | L-Br             | 0    | Gray       | 0    | Cr          | 1    | 1            | (12, 13), Obs |           |
| <i>Hyloxalus</i>   | <i>yasuni</i>        | 147    | D-Br                  | 0 | --                | 0 | --                      | 0 | D-Br                   | 0 | D-Br                     | 0 | L-Br                       | 0 | D-Br           | 0    | --             | 0  | D-Br             | 0    | Gray       | 0    | Cr          | 1    | 1            | (12, 53), Obs |           |
| <i>Hyloxalus</i>   | <i>yasuni</i>        | 145    | D-Br                  | 0 | --                | 0 | --                      | 0 | D-Br                   | 0 | D-Br                     | 0 | L-Br                       | 0 | D-Br           | 0    | --             | 0  | D-Br             | 0    | Gray       | 0    | Cr          | 1    | 1            | (12, 53), Obs |           |
| <i>Hyloxalus</i>   | <i>yasuni</i>        | 146    | D-Br                  | 0 | --                | 0 | --                      | 0 | D-Br                   | 0 | D-Br                     | 0 | L-Br                       | 0 | D-Br           | 0    | --             | 0  | D-Br             | 0    | Gray       | 0    | Cr          | 1    | 1            | (12, 53), Obs |           |
| <i>Mannophryne</i> | <i>urticans</i>      | 25     | Br                    | 0 | --                | 0 | D-Br                    | 0 | D-Br                   | 0 | Cr                       | 1 | Cr                         | 1 | L-Br           | 0    | --             | 0  | L-Br             | 0    | Gray       | 0    | Gray        | 0    | 2            | (13, 58), Obs |           |
| <i>Mannophryne</i> | <i>cordilleriana</i> | 20     | Br                    | 0 | --                | 0 | D-Br                    | 0 | D-Br                   | 0 | Cr                       | 1 | Cr                         | Y | 1              | Br   | 0              | -- | 0                | D-Br | 0          | Gray | 0           | Gray | 0            | 2             | (58), Obs |
| <i>Mannophryne</i> | <i>herminae</i>      | 19     | Br                    | 0 | --                | 0 | L-Br                    | 0 | D-Br                   | 0 | Cr                       | 1 | Wh                         | 1 | L-Br           | 0    | --             | 0  | Br               | 0    | Gray       | 0    | Cr          | 1    | 3            | (13, 58), Obs |           |
| <i>Mannophryne</i> | <i>sp. Guatopo</i>   | 15     | Br                    | 0 | --                | 0 | L-Br                    | 0 | D-Br                   | 0 | Cr                       | 1 | Wh                         | 1 | L-Br           | 0    | --             | 0  | Br               | 0    | Gray       | 0    | Cr          | 1    | 3            | (13, 58), Obs |           |
| <i>Mannophryne</i> | <i>leonardo</i>      | 16     | L-Br                  | 0 | --                | 0 | L-Br                    | 0 | D-Br                   | 0 | Cr                       | 1 | Cr                         | 1 | L-Br           | 0    | --             | 0  | Br               | 0    | Gray       | 0    | Cr          | 1    | 3            | (59), Obs     |           |
| <i>Mannophryne</i> | <i>olmonae</i>       | 12     | Br                    | 0 | --                | 0 | D-Br                    | 0 | Br                     | 0 | Cr                       | 1 | Wh                         | 1 | L-Br           | 0    | --             | 0  | L-Br             | 0    | Gray       | 0    | Gray        | 0    | 2            | (13, 58, 60)  |           |
| <i>Mannophryne</i> | <i>orellana</i>      | 22     | D-Br                  | 0 | --                | 0 | L-Br                    | 0 | Bl                     | 0 | Cr                       | 1 | Wh                         | 1 | D-Br           | 0    | --             | 0  | D-Br             | 0    | Gray       | 0    | Gray        | 0    | 2            | (61), Obs     |           |
| <i>Mannophryne</i> | <i>orellana</i>      | 21     | D-Br                  | 0 | --                | 0 | L-Br                    | 0 | Bl                     | 0 | Cr                       | 1 | Wh                         | 1 | D-Br           | 0    | --             | 0  | D-Br             | 0    | Gray       | 0    | Gray        | 0    | 2            | (61), Obs     |           |
| <i>Mannophryne</i> | <i>riveroi</i>       | 13     | D-Br                  | 0 | --                | 0 | D-Br                    | 0 | D-Br                   | 0 | --                       | 0 | --                         | 0 | D-Br           | 0    | Or             | 1  | D-Br             | 0    | Gray       | 0    | Y/Or        | 1    | 2            | (13, 62), Obs |           |
| <i>Mannophryne</i> | <i>trinitatis</i>    | 17     | D-Br                  | 0 | --                | 0 | D-Br                    | 0 | Bl                     | 0 | Cr                       | 1 | Wh                         | 1 | L-Br           | 0    | --             | 0  | Br               | 0    | Gray       | 0    | Bl          | 0    | 2            | (13, 58, 63)  |           |
| <i>Mannophryne</i> | <i>collaris</i>      | 23     | D-Br                  | 0 | --                | 0 | Bl                      | 0 | D-Br                   | 0 | Cr                       | 1 | Cr                         | Y | 1              | L-Br | 0              | Y  | 1                | L-Br | 0          | Gray | 0           | Gray | 0            | 3             | (61), Obs |
| <i>Mannophryne</i> | <i>collaris</i>      | 24     | D-Br                  | 0 | --                | 0 | Bl                      | 0 | D-Br                   | 0 | Cr                       | 1 | Cr                         | Y | 1              | L-Br | 0              | Y  | 1                | L-Br | 0          | Gray | 0           | Gray | 0            | 3             | (61), Obs |
| <i>Mannophryne</i> | <i>venezuelensis</i> | 18     | D-Br                  | 0 | --                | 0 | L-Br                    | 0 | D-Br                   | 0 | Cr                       | 1 | Wh                         | 1 | D-Br           | 0    | --             | 0  | D-Br             | 0    | Gray       | 0    | Gray        | 0    | 2            | (13, 64), Obs |           |
| <i>Mannophryne</i> | <i>vulcano</i>       | 14     | L-Br                  | 0 | --                | 0 | D-Br                    | 0 | D-Br                   | 0 | Cr                       | 1 | Cr                         | 1 | L-Br           | 0    | --             | 0  | L-Br             | 0    | Gray       | 0    | Cr          | 1    | 3            | (13, 61), Obs |           |
| <i>Mannophryne</i> | <i>yustizi</i>       | 26     | Bl                    | 0 | --                | 0 | D-Br                    | 0 | Bl                     | 0 | Y                        | 1 | Cr                         | Y | 1              | D-Br | 0              | Y  | 1                | D-Br | 0          | Gray | 0           | Gray | 0            | 3             | Obs       |

Color codes: Black (Bl), blue (B), brown (Br), cream (Cr), dark brown (D-Br), gray (Gray), green (Gr), light brown (L-Br), light green (L-Gr), light yellow (L-Y), orange (Or), red (R), yellow (Y), and white (Wh).

Table S2 (Cont.) Binary coloration classification and composite conspicuousness (i.e., total contrast score TCS or  $\Sigma S_i$  measured as the sum of all binary  $S_i$  points) of the species of poison frogs included in the analysis. Description of coloration is based on specimen descriptions from the literature, as well as from scoring of photographs of live animals. Nomenclature of the regions in the male frog's body is provided in the Fig. S3.

| Genus                | Species           | Phy ID | Dorsal Background (a) |   | Dorsal Stripe (b) |   | Dorsolateral Stripe (c) |    |       | Lateral Background (d) |       | Ventrolateral Stripe (e) |       | Oblique Lateral Stripe (f) |       | Arm Dorsal (g) |       |    | Flash Mark (h) |    | Thigh Dorsal (i) |      | Throat (j) |      | Abdomen (k) |    | $\Sigma S_i$  | Ref |       |               |
|----------------------|-------------------|--------|-----------------------|---|-------------------|---|-------------------------|----|-------|------------------------|-------|--------------------------|-------|----------------------------|-------|----------------|-------|----|----------------|----|------------------|------|------------|------|-------------|----|---------------|-----|-------|---------------|
|                      |                   |        | Color                 | S | Color             | S | Color                   | S  | Color | S                      | Color | S                        | Color | S                          | Color | S              | Color | S  | Col            | S  | Color            | S    | Color      | S    | Color       | S  |               |     | Color | S             |
| <i>Phyllobates</i>   | <i>aurotaenia</i> | 108    | Bl                    | 0 | --                | 0 | L-Gr                    | Or | 1     | Bl                     | 0     | B                        | 1     | --                         | 0     | Bl             | B     | 1  | L-Gr           | 1  | Bl               | B    | 1          | Bl   | 0           | Bl | B             | 1   | 6     | (6, 22), Obs  |
| <i>Phyllobates</i>   | <i>lugubris</i>   | 111    | Bl                    | 0 | --                | 0 | Y                       |    | 1     | Bl                     | 0     | B                        | 1     | --                         | 0     | Bl             | Wh    | 1  | B              | 1  | Bl               | B    | 1          | Bl   | 0           | Bl | B             | 1   | 6     | (6, 22), Obs  |
| <i>Phyllobates</i>   | <i>lugubris</i>   | 112    | Bl                    | 0 | --                | 0 | Y                       |    | 1     | Bl                     | 0     | B                        | 1     | --                         | 0     | Bl             | Wh    | 1  | B              | 1  | Bl               | B    | 1          | Bl   | 0           | Bl | B             | 1   | 6     | (6, 22), Obs  |
| <i>Phyllobates</i>   | <i>terribilis</i> | 109    | Wh                    | 1 | --                | 0 | --                      |    | 0     | Wh                     | 1     | --                       | 0     | --                         | 0     | Wh             |       | 1  | --             | 0  | Wh               |      | 1          | Wh   | 1           | Wh |               | 1   | 6     | (22, 65), Obs |
| <i>Phyllobates</i>   | <i>vittatus</i>   | 110    | Bl                    | 0 | Or                | 1 | Or                      |    | 1     | Bl                     | 0     | B                        | 1     | --                         | 0     | Bl             | B     | 1  | B              | 1  | Bl               | B    | 1          | Bl   | 0           | Bl | B             | 1   | 7     | (6, 22), Obs  |
| <i>Rheobates</i>     | <i>palmatus</i>   | 28     | D-Br                  | 0 | --                | 0 | --                      |    | 0     | D-Br                   | 0     | Wh                       | 1     | Wh                         | 1     | D-Br           | 0     | -- | 0              | Br | 0                | Gray | 0          | Cr   | 1           | 3  | (13, 66), Obs |     |       |               |
| <i>Rheobates</i>     | <i>palmatus</i>   | 27     | D-Br                  | 0 | --                | 0 | --                      |    | 0     | D-Br                   | 0     | Wh                       | 1     | Wh                         | 1     | D-Br           | 0     | -- | 0              | Br | 0                | Gray | 0          | Cr   | 1           | 3  | (13, 66), Obs |     |       |               |
| <i>Silverstoneia</i> | <i>flotator</i>   | 62     | Br                    | 0 | --                | 0 | L-Br                    |    | 0     | D-Br                   | 0     | Cr                       | 1     | Cr                         | 1     | Br             | 0     | -- | 0              | Br | 0                | Gray | 0          | Cr   | 1           | 3  | (20, 67), Obs |     |       |               |
| <i>Silverstoneia</i> | <i>flotator</i>   | 63     | Br                    | 0 | --                | 0 | L-Br                    |    | 0     | D-Br                   | 0     | Cr                       | 1     | Cr                         | 1     | Br             | 0     | -- | 0              | Br | 0                | Gray | 0          | Cr   | 1           | 3  | (20, 67), Obs |     |       |               |
| <i>Silverstoneia</i> | <i>nubicola</i>   | 66     | Br                    | 0 | L-Br              | 0 | D-Br                    |    | 0     | Bl                     | 0     | Cr                       | 1     | Cr                         | 1     | Br             | 0     | -- | 0              | Br | 0                | Bl   | 0          | Bl   | 0           | 2  | (13, 67)      |     |       |               |
| <i>Silverstoneia</i> | <i>nubicola</i>   | 65     | Br                    | 0 | L-Br              | 0 | D-Br                    |    | 0     | Bl                     | 0     | Cr                       | 1     | Cr                         | 1     | Br             | 0     | -- | 0              | Br | 0                | Bl   | 0          | Bl   | 0           | 2  | (13, 67)      |     |       |               |
| <i>Silverstoneia</i> | <i>nubicola</i>   | 64     | D-Br                  | 0 | --                | 0 | Br                      |    | 0     | D-Br                   | 0     | Cr                       | 1     | Cr                         | 1     | Br             | 0     | -- | 0              | Br | 0                | Gray | 0          | Gray | 0           | 2  | Obs           |     |       |               |

Color codes: Black (Bl), blue (B), brown (Br), cream (Cr), dark brown (D-Br), gray (Gray), green (Gr), light brown (L-Br), light green (L-Gr), light yellow (L-Y), orange (Or), red (R), yellow (Y), and white (Wh).

References Table S2:

1. Barrio-Amoros CL & Santos JC (2009) Description of a new *Allobates* (Anura, Dendrobatidae) from the eastern Andean piedmont, Venezuela. *Phyllomedusa* 8(2):89-104.
2. Lima AP, Caldwell JP, & Strussmann C (2009) Redescription of *Allobates brunneus* (Cope) 1887 (Anura: Aromobatidae: Allobatinae), with a description of the tadpole, call, and reproductive behavior. *Zootaxa* (1988):1-16.
3. Morales VR (2002 [2000]) Sistemática y biogeografía del grupo *trilineatus* (Amphibia, Anura, Dendrobatidae, *Colostethus*) con descripción de once nuevas especies. *Publicaciones de la Asociación de Amigos de Doñana* 13:1-59.
4. Lima AP & Caldwell JP (2001) A new Amazonian species of *Colostethus* with sky blue digits. *Herpetologica* 57(2):180-189.
5. Duellman WE (1978) The biology of an equatorial herpetofauna in amazonian Ecuador. *Misc Publ Mus Nat Hist Univ Kansas* 65:1-352.
6. Silverstone PA (1976) A revision of the poison-arrow frogs of the genus *Phyllobates* Bibron in Sagra (Family Dendrobatidae). *Bulletin of the Natural History Museum of Los Angeles County Science* 27:1-53.
7. Amezcua A, et al. (2009) Calls, colours, shape, and genes: a multi-trait approach to the study of geographic variation in the Amazonian frog *Allobates femoralis*. *Biological Journal of the Linnean Society. Linnean Society of London* 98(4):826-838.
8. Simoes PI, Lima AP, & Farias IP (2010) The description of a cryptic species related to the pan-Amazonian frog *Allobates femoralis* (Boulenger 1883) (Anura: Aromobatidae). *Zootaxa* 2406:1-28.
9. Kok PJR, et al. (2006) A new species of *Colostethus* (Anura, Dendrobatidae) from French Guiana with a redescription of *Colostethus beebei* (Noble, 1923) from its type locality. *Phyllomedusa* 5(1):43-66.
10. Rivero JA (1980 [1978]) Notas sobre los anfibios de Venezuela III. Nuevos *Colostethus* de los Andes venezolanos. *Memorias de la Sociedad de Ciencias Naturales, La Salle* 109:95-111.
11. Grant T & Rodriguez LO (2001) Two new species of frogs of the genus *Colostethus* (Dendrobatidae) from Peru and a redescription of *C. trilineatus* (Boulenger, 1883). *American Museum Novitates* 3355:1-24.
12. Coloma LA (1995) Ecuadorian frogs of the genus *Colostethus* (Anura:Dendrobatidae). *Misc Publ Mus Nat Hist Univ Kansas* 87:1-72.
13. Edwards SR (1974) A Phenetic Analysis of the Genus *Colostethus* (Anura: Dendrobatidae). Ph.D. Dissertation (University of Kansas, Lawrence).
14. Caldwell JP, Lima AP, & Keller R (2002) Redescription of *Colostethus marchesianus* (Melin, 1941) from its type locality. *Copeia* 2002 (1):157-165.
15. Caldwell JP & Lima AP (2003) A new amazonian species of *Colostethus* (Anura : Dendrobatidae) with a nidicolous tadpole. *Herpetologica* 59(2):219-234.
16. Verdade VK & Rodrigues MT (2007) Taxonomic review of *Allobates* (Anura, Aromobatidae) from the Atlantic Forest, Brazil. *J Herp* 41(4):566-580.
17. Duellman WE (2004) Frogs of the genus *Colostethus* (Anura: Dendrobatidae) in the Andes of Northern Peru. *Scientific Papers, Natural History Museum, The University of Kansas* 35:1-49.



18. Lima AP, et al. (2006) *Guia de Sapos da Reserva Adolpho Ducke, Amazônia Central* (INPA, PPBio, Fundación BBVA, CNPq, Attema, Manaus, Brazil).
19. Savage JM (2002) *The Amphibians and Reptiles of Costa Rica* (The University of Chicago Press, Chicago, IL) p 934.
20. Ibanez DR, Rand AS, & Jaramillo C (1999) *Los anfibios del Monumento Natural Barro Colorado, Parque Nacional Soberania y areas adyacentes / The amphibians of Barro Colorado Nature Monument, Soberania National Park and adjacent areas. Panama* (Editorial Mizraqui & Pujol, S.A., Panama City, Panama) p 192.
21. Duellman WE (2005) *Cusco Amazónico: The Lives of Amphibians and Reptiles in an Amazonian Rainforest*. (Cornell University Press, Ithaca, NY) p 433.
22. Lötters S, Jungfer KH, Henkel FW, & Schmidt W (2007) *Poison Frogs. Biology, Species & Captive Husbandry* (Edition Chimaira, Frankfurt am Main) p 668.
23. Jungfer KH (1989) Pfeilgiftfrosche der Gattung *Epipedobates* mit rot granuliertem Rücken aus dem Oriente von Ecuador und Peru. *Salamandra* 25(2):81-98.
24. Lötters S, Debold P, Henle K, Glaw F, & Kneller M (1997) Ein neuer Pfeilgiftfrosch aus der *Epipedobates pictus*-Gruppe vom Osthang der Cordillera Azul in Peru. *Herpetofauna* 19(110):25-34.
25. Brown JL & Twomey E (2009) Complicated histories: three new species of poison frogs of the genus *Ameerega* (Anura: Dendrobatidae) from north-central Peru. *Zootaxa* (2049):1-38.
26. Schulte R (1981) *Dendrobates bassleri* - Freilandbeobachtungen Haltung und Zucht. *Herpetofauna* 12:23-28.
27. Haddad CFB & Martins M (1994) Four species of Brazilian poison frogs related to *Epipedobates pictus* (Dendrobatidae): taxonomy and natural history observations. *Herpetologica* 50(3):282-295.
28. Schulte R (1999) *Pfeilgiftfrösche "Artenteil - Peru"* (INIBICO, Waiblingen, Germany) p 292.
29. Rodriguez LO & Duellman WE (1994) *Guide to the frogs of the Iquitos Region, Amazonian Peru* (The University of Kansas Natural History Museum, Lawrence, KS) p 80.
30. Myers CW & Daly JW (1979) A name for the poison frog of Cordillera Azul, eastern Peru, with notes on its biology and skin toxins (Dendrobatidae). *Am Mus Novit* 2674:1-24.
31. Lescure J & Marty C (2000) *Atlas des Amphibiens de Guyane* (Muséum National d'Histoire Naturelle. Patrimoines Naturels, Paris, France) p 388.
32. Barrio-Amoros CL & Santos JC (2011) Redescription and generic assignation of *Dendrobates rufulus* GORZULA, 1990 (Anura: Dendrobatidae) from the Chimanta Massif, Venezuela. *Salamandra* 47(3):155-160.
33. Barrio-Amoros CL, Santos JC, & Jovanovic O (2010) A new dendrobatid frog (Anura: Dendrobatidae: *Anomaloglossus*) from the Orinoquian rainforest, southern Venezuela. *Zootaxa* (2413):37-50.
34. Barrio-Amoros CL, Romero E, & infante E (2010) The critically endangered Venezuelan dendrobatid frog *Aromobates meridensis* (Amphibia: Anura): redescription, natural history and conservation. *Rev Ecol Lat Am* 15(1):1-12.
35. Barrio-Amoros CL, Rivero R, & Santos JC (2011) A new striking dendrobatid frog (Dendrobatidae: Aromobatinae, *Aromobates*) from the Venezuelan Andes. *Zootaxa* (3063):39-52.
36. Grant T & Castro F (1998) The cloud forest *Colostethus* (Anura: Dendrobatidae) of a region of the Cordillera Occidental of Colombia. *J Herp* 32(3):378-392.

37. Silverstone PA (1975) A revision of the poison-arrow frogs of the genus *Dendrobates* Wagler. *Bulletin of the Natural History Museum of Los Angeles County Science* (21):1-55.
38. Myers CW & Daly JW (1980) Taxonomy and ecology of *Dendrobates bombetes*, a new Andean poison frog with new skin toxins. *Amer. Mus. Novitates* (2692):1-23.
39. Caldwell JP & Myers CW (1990) A new poison frog from Amazonian Brazil, with further revision of the *quinquevittatus* group of *Dendrobates*. *Am Mus Novit* (2988):1-21.
40. Jungfer K, H, Lötters S, & Jörgens D (2000) Der kleinste Pfeilgiftfrosch - eine neue *Dendrobates* - Art aus West-Panama. *Herpetofauna* 22(129):11-18.
41. Brown JL, et al. (2011) A taxonomic revision of the Neotropical poison frog genus *Ranitomeya* (Amphibia: Dendrobatidae). *Zootaxa* 3083:1-120.
42. Myers CW, Daly JW, Garraffo HM, Wisnieski A, & Cover JF (1995) Discovery of the Costa Rican poison frog *Dendrobates granuliferus* in sympatry with *Dendrobates pumilio*, and comments on the taxonomic use of skin alkaloids. *American Museum Novitates* 3144:1-21.
43. Myers CW & Daly JW (1976) Preliminary evaluation of skin toxins and vocalizations in taxonomic and evolutionary studies of poison-dart frogs (Dendrobatidae). *Bull Amer Mus Nat Hist* 157:173-262.
44. Symula R, Schulte R, & Summers K (2001) Molecular phylogenetic evidence for a mimetic radiation in Peruvian poison frogs supports a Mullerian mimicry hypothesis. *Proc. R. Soc. Lond., B, Biol. Sci.* 268(1484):2415-2421.
45. Morales VR (1992) Dos especies nuevas de *Dendrobates* (Anura: Dendrobatidae) para Peru. *Carib J Sci* 28(3-4):191-199.
46. Schulte R (1990) Redescubrimiento y redefinición de *Dendrobates mysterious* (Myers, 1982) de la Cordillera del Condor. *Boletín de Lima* 12:57-68.
47. Lötters S, Glaw F, Kohler J, & Castro F (1999) On the geographic variation of the advertisement call of *Dendrobates histrionicus* Berthold, 1845 and related forms from north-western South America. *Herpetozoa* 12(1/2):23-38.
48. Brown JL, Schulte R, & Summers K (2006) A new species of *Dendrobates* (Anura : Dendrobatidae) from the Amazonian lowlands in Peru. *Zootaxa* (1152):45-58.
49. Ruiz-Carranza PM & Ramirez-Pinilla MP (1992) Una nueva especie de *Minyobates* (Anura:Dendrobatidae) de Colombia. *Lozania* 61:1-16.
50. Duellman WE & Wild ER (1993) Anuran amphibians from the Cordillera de Huancabamba, Northern Peru: systematics, ecology, and biogeography. *Univ. Kans. Occ. Pap. Mus. Nat. Hist.* 157:1-53.
51. Cisneros-Heredia DF & Yáñez-Muñoz MH (2010) A new poison frog of the genus *Epipedobates* (Dendrobatoidea: Dendrobatidae) from the north-western Andes of Ecuador. *Avances* 2(3):B83-B86.
52. Kneller M & Henle K (1985) Ein neuer Blattsteiger-Frosch (Salientia: Dendrobatidae: *Phyllobates*) aus Peru. *Salamandra* 21(1):62-69.
53. Paez-Vacas MI, Coloma LA, & Santos JC (2010) Systematics of the *Hyloxalus bocagei* complex (Anura: Dendrobatidae), description of two new cryptic species, and recognition of *H. maculosus*. *Zootaxa* 2711:1-75.
54. Yáñez-Muñoz MH, Meza-Ramos P, Altamirano M, & Castro C (2010) Estado poblacional de una de rana nodriza (Anura: Dendrobatidae: *Hyloxalus delatorreae*), críticamente amenazada, en los Andes Norte de Ecuador. *Boletín Técnico, Serie Zoológica. Laboratorios IASA I* 9(6):38-64.

55. Vigle GO & Miyata K (1980) A new species of *Dendrobates* (Anura: Dendrobatidae) from the lowland rain forests of western Ecuador. *Breviora* 459:1-7.
56. Myers CW & Burrowes PA (1987) A new poison frog (*Dendrobates*) from Andean Colombia, with notes on a lowland relative. *Amer. Mus. Novitates* 2899:1-17.
57. Guayasamin JM & Funk WC (2009) The amphibian community at Yanayacu Biological Station, Ecuador, with a comparison of vertical microhabitat use among *Pristimantis* species and the description of a new species of the *Pristimantis myersi* group. *Zootaxa* 2220:41-66.
58. La Marca E (1995 [1994]) Taxonomy of the frogs of the genus *Mannophryne* (Amphibia; Anura: Dendrobatidae). *Pub Asoc Amigos de Doñana* 4:1-75.
59. Manzanilla J, La Marca E, Jowers M, Sanchez D, & Garcia-Paris M (2007 [2005]) Un nuevo *Mannophryne* (Amphibia: Anura: Dendrobatidae) del macizo del Turimiquire, noreste de Venezuela. *Herpetotropicos* 2(2):105-113.
60. Hardy JDJ (1983) A new frog of the genus *Colostethus* from the island of Tobago, West Indies (Anura: Dendrobatidae). *Bulletin of the Maryland Herpetological Society* 19:47-57.
61. Barrio-Amoros CL, Santos JC, & Molina CR (2010) An addition to the diversity of dendrobatid frogs in Venezuela: description of three new collared frogs (Anura: Dendrobatidae: *Mannophryne*). *Phyllomedusa* 9(1):3-35.
62. Barrio-Amoros CL, Rivas GA, Molina C, Santos JC, & Kaiser H (2010) Intraspecific variation in the endangered frog *Mannophryne riveroi* (Anura, Dendrobatidae, Aromobatinae), with comments on coloration and natural history. *Herpetology Notes* 3:151-160.
63. Murphy JC (1997) *Amphibians and Reptiles of Trinidad and Tobago* (Krieger Publishing Company, Malabar, FL) p 245.
64. Manzanilla J, Jowers MJ, La Marca E, & Garcia-Paris M (2007) Taxonomic reassessment of *Mannophryne trinitatis* (Anura: Dendrobatidae) with a description of a new species from Venezuela. *Herp J* 17:31-42.
65. Myers CW, Daly JW, & Malkin B (1978) A dangerously toxic new frog (*Phyllobates*) used by Embera Indians of western Colombia, with discussion of blowgun fabrication and dart poisoning. *Bull Amer Mus Nat Hist* 161(2):307-366.
66. Luddecke H (1999) Behavioral aspects of the reproductive biology of the Andean frog *Colostethus palmatus* (Amphibia: Dendrobatidae). *Rev Acad Colomb Cienc* 23:303-316.
67. Ibanez R & Smith EM (1995) Systematic status of *Colostethus flotator* and *C. nubicola* (Anura: Dendrobatidae) in Panama. *Copeia* 1995:446-456.

Table S3. Phylogenetic signal and model character evolution of the poison frog call parameters, and the three principal components summarizing the call parameters. Lambda ( $\lambda$ ) estimates for color variables (TCS3, TCS4, ..., TCS8) and ability to sequester alkaloids in poison frogs.

| Trait ( $N = 169$ )                                   | Lambda ( $\lambda$ ) |                         | Blomberg <i>et al.</i> 's $K$ |                         | White Noise Model |          | BM Model |          | OU Model |          | Lambda Model |          | Best Model |
|-------------------------------------------------------|----------------------|-------------------------|-------------------------------|-------------------------|-------------------|----------|----------|----------|----------|----------|--------------|----------|------------|
|                                                       | Estimate             | $P$ -value <sup>b</sup> | Estimate                      | $P$ -value <sup>c</sup> | $ln$ -L           | AICc     | $ln$ -L  | AICc     | $ln$ -L  | AICc     | $ln$ -L      | AICc     |            |
| SVL                                                   | 0.864                | <0.001                  | 0.263                         | 0.001                   | 147.091           | -290.110 | 173.399  | -342.726 | 193.224  | -380.301 | 186.714      | -367.282 | OU         |
| Temperature                                           | 0.433                | <0.001                  | 0.055                         | 0.367                   | 190.041           | -376.009 | 80.659   | -157.246 | 191.036  | -375.925 | 203.975      | -401.804 | Lambda     |
| Initial Pulse-Note Duration                           | 0.909                | <0.001                  | 0.325                         | 0.001                   | 196.683           | -389.293 | 240.374  | -476.674 | 255.803  | -505.459 | 256.984      | -507.821 | Lambda/OU  |
| Interval between Initial Pulse-Notes                  | 0.938                | <0.001                  | 0.340                         | 0.001                   | -281.180          | 566.433  | -235.322 | 474.717  | -222.780 | 451.707  | -220.567     | 447.280  | Lambda     |
| Middle Pulse-Note Duration                            | 0.921                | <0.001                  | 0.319                         | 0.001                   | 192.492           | -380.912 | 235.085  | -466.096 | 250.925  | -495.704 | 251.841      | -497.535 | Lambda/OU  |
| Interval between Middle Pulse-Notes                   | 0.987                | <0.001                  | 0.437                         | 0.001                   | -270.999          | 546.071  | -203.277 | 410.626  | -196.768 | 399.682  | -200.601     | 407.347  | OU         |
| Middle Pulse-Note Rise Time                           | 0.775                | <0.001                  | 0.208                         | 0.001                   | 263.996           | -523.920 | 270.349  | -536.625 | 295.831  | -585.516 | 297.195      | -588.243 | Lambda/OU  |
| Middle Pulse-Note Shape                               | 0.506                | <0.001                  | 0.090                         | 0.004                   | 124.182           | -244.292 | 58.541   | -113.009 | 125.376  | -244.606 | 140.433      | -274.721 | Lambda     |
| Middle Pulse-Note Duty                                | 0.916                | <0.001                  | 0.239                         | 0.001                   | 56.023            | -107.974 | 73.390   | -142.707 | 88.923   | -171.699 | 79.791       | -153.436 | OU         |
| Middle Pulse-Note Rate                                | 0.990                | <0.001                  | 0.476                         | 0.001                   | -162.223          | 328.519  | -87.055  | 178.182  | -81.288  | 168.723  | -84.739      | 175.624  | OU         |
| Initial Q1                                            | 0.895                | <0.001                  | 0.254                         | 0.001                   | -227.623          | 459.319  | -204.389 | 412.851  | -187.339 | 380.824  | -184.548     | 375.242  | Lambda     |
| Initial Peak Frequency                                | 0.897                | <0.001                  | 0.261                         | 0.001                   | -230.746          | 465.565  | -204.941 | 413.955  | -188.307 | 382.760  | -186.309     | 378.764  | Lambda     |
| Initial Q3                                            | 0.901                | <0.001                  | 0.269                         | 0.001                   | -233.305          | 470.683  | -205.157 | 414.387  | -189.345 | 384.836  | -188.180     | 382.506  | Lambda/OU  |
| Initial Modulation (Q1 – Q3)                          | 0.731                | <0.001                  | 0.152                         | 0.001                   | -25.060           | 54.192   | -53.296  | 110.665  | -12.018  | 30.181   | 27.689       | -49.232  | Lambda     |
| Middle Q1                                             | 0.915                | <0.001                  | 0.286                         | 0.001                   | -232.873          | 469.819  | -199.509 | 403.091  | -185.384 | 376.915  | -186.410     | 378.966  | Lambda/OU  |
| Middle Peak Frequency                                 | 0.917                | <0.001                  | 0.293                         | 0.001                   | -235.089          | 474.251  | -199.664 | 403.401  | -185.790 | 377.727  | -187.113     | 380.373  | Lambda/OU  |
| Middle Q3                                             | 0.918                | <0.001                  | 0.298                         | 0.001                   | -238.051          | 480.174  | -201.184 | 406.441  | -187.730 | 381.607  | -188.915     | 383.976  | Lambda/OU  |
| Middle Modulation (Q1 – Q3)                           | 0.806                | <0.001                  | 0.256                         | 0.001                   | -27.957           | 59.987   | -12.609  | 29.290   | 8.874    | -11.601  | 32.109       | -58.072  | Lambda     |
| PC1-Size-Spectral (Morphology)                        | 0.913                | <0.001                  | 0.284                         | 0.001                   | -239.299          | 482.671  | -206.554 | 417.182  | -192.138 | 390.422  | -192.473     | 391.093  | Lambda/OU  |
| PC2-Fine-Temporal (Physiology)                        | 0.949                | <0.001                  | 0.317                         | 0.001                   | -239.299          | 482.671  | -197.151 | 398.375  | -182.935 | 372.017  | -181.462     | 369.071  | Lambda/OU  |
| PC3-Temperature-Modulation (Environment)              | 0.772                | <0.001                  | 0.183                         | 0.001                   | -239.299          | 482.671  | -253.210 | 510.493  | -218.335 | 442.816  | -198.461     | 403.068  | Lambda     |
| Color3 (Discrete) $\Sigma S_i \geq 3$                 | 1.000                | <0.001                  | --                            | --                      | --                | --       | --       | --       | --       | --       | --           | --       | --         |
| Color4 (Discrete) $\Sigma S_i \geq 4$                 | 1.000                | <0.001                  | --                            | --                      | --                | --       | --       | --       | --       | --       | --           | --       | --         |
| Color5 (Discrete) $\Sigma S_i \geq 5$                 | 0.938                | <0.001                  | --                            | --                      | --                | --       | --       | --       | --       | --       | --           | --       | --         |
| Color6 (Discrete) $\Sigma S_i \geq 6$                 | 0.906                | <0.001                  | --                            | --                      | --                | --       | --       | --       | --       | --       | --           | --       | --         |
| Color7 (Discrete) $\Sigma S_i \geq 7$                 | 0.000                | 1.000                   | --                            | --                      | --                | --       | --       | --       | --       | --       | --           | --       | --         |
| Color8 (Discrete) $\Sigma S_i \geq 8$                 | 0.000                | 1.000                   | --                            | --                      | --                | --       | --       | --       | --       | --       | --           | --       | --         |
| Alkaloid Presence <sup>a</sup> ( $N = 96$ ; Discrete) | 1.000                | <0.001                  | --                            | --                      | --                | --       | --       | --       | --       | --       | --           | --       | --         |

<sup>a</sup> The number of taxa with information about presence of alkaloids is 96 of the 169 species in the long dataset.

<sup>b</sup>  $P$ -value of rejecting  $H_0: \lambda = 0$  (no phylogenetic signal).

<sup>c</sup>  $P$ -value of the observed  $K$  is significantly higher than the random values.

Table S3 (Cont.) Correlations between discrete binary variables: Alkaloid presence and conspicuousness variables.

| Color Binary Variables | Phylogenetic Logistic Regression with Firth Correction |            |                     |                  |                |                  |                    |                  |         |                |                  | Pagel's 1994 Correlation of Two Binary Characters |                    |                |                  |                                      |                    |                |                  |
|------------------------|--------------------------------------------------------|------------|---------------------|------------------|----------------|------------------|--------------------|------------------|---------|----------------|------------------|---------------------------------------------------|--------------------|----------------|------------------|--------------------------------------|--------------------|----------------|------------------|
|                        | Phylogenetic Signal                                    |            | Intercept ( $b_0$ ) |                  |                |                  | Alkaloid ( $b_1$ ) |                  |         |                |                  | BayesTraits Method Alkaloid                       |                    |                |                  | Midford and Maddison Method Alkaloid |                    |                |                  |
|                        | $a$                                                    | $P$ -value | Value $\pm$ SE      | $P$ -value       | BTSP $\bar{X}$ | BTSP $P$ -value  | Value $\pm$ SE     | $P$ -value       | Odds %  | BTSP $\bar{X}$ | BTSP $P$ -value  | Dependent log-LH                                  | Independent log-LH | $2^*\Delta LH$ | $P$ -value       | Dependent log-LH                     | Independent log-LH | $2^*\Delta LH$ | $P$ -value       |
| TCS3                   | 0.409                                                  | 0.066      | 0.556 $\pm$ 0.930   | 0.551            | 0.320          | 0.820            | 0.763 $\pm$ 0.320  | <b>0.019</b>     | ↑114.39 | 0.853          | <b>0.032</b>     | -40.34302                                         | -44.05065          | 7.41525        | 0.116            | -40.43380                            | -44.06675          | 7.26590        | 0.122            |
| TCS4                   | -0.821                                                 | 0.137      | 1.173 $\pm$ 0.494   | 0.020            | 1.158          | 0.012            | 1.928 $\pm$ 0.440  | <b>&lt;0.001</b> | ↑587.57 | 1.947          | <b>&lt;0.001</b> | -38.75321                                         | -44.73237          | 11.95833       | <b>0.018</b>     | -38.75888                            | -44.76257          | 12.00738       | <b>0.017</b>     |
| TCS5                   | -0.617                                                 | 0.167      | 0.834 $\pm$ 0.496   | 0.096            | 0.853          | 0.084            | 1.967 $\pm$ 0.411  | <b>&lt;0.001</b> | ↑614.85 | 2.019          | <b>&lt;0.001</b> | -37.98090                                         | -50.41314          | 24.86447       | <b>&lt;0.001</b> | -40.47500                            | -50.42091          | 19.89181       | <b>0.001</b>     |
| TCS6                   | -0.782                                                 | 0.148      | -0.016 $\pm$ 0.408  | 0.968            | 0.001          | 0.976            | 1.703 $\pm$ 0.344  | <b>&lt;0.001</b> | ↑448.82 | 1.746          | <b>&lt;0.001</b> | -52.96357                                         | -67.35238          | 28.77761       | <b>&lt;0.001</b> | -54.25038                            | -67.35463          | 26.20849       | <b>&lt;0.001</b> |
| TCS7                   | -2.524                                                 | 0.291      | -2.896 $\pm$ 0.794  | <b>&lt;0.001</b> | -2.541         | <b>&lt;0.001</b> | 1.779 $\pm$ 0.808  | <b>0.030</b>     | ↑492.27 | 1.469          | <b>&lt;0.001</b> | -45.63354                                         | -55.39872          | 19.53036       | <b>0.001</b>     | -47.14687                            | -55.83869          | 17.38363       | <b>0.002</b>     |
| TCS8                   | -2.378                                                 | 0.276      | -3.076 $\pm$ 0.810  | <b>&lt;0.001</b> | -2.676         | <b>&lt;0.001</b> | 1.611 $\pm$ 0.822  | 0.053            | ↑400.73 | 1.299          | <b>&lt;0.001</b> | -41.29217                                         | -48.34157          | 14.09879       | <b>0.007</b>     | -42.34318                            | -48.40178          | 12.11720       | <b>0.017</b>     |

\*BTSP are  $P$ -values estimated from bootstraps using a statistic derived from 1000 simulated data sets. See Ives and Garland (2010) Syst Biol 59:9-26.

Table S3 (Cont.) Correlations between discrete binary variables: Call behavior (exposed/concealed), alkaloid sequestration ability (able/unable), and conspicuousness (yes/no) variables.

|                  |          | Pagel's 1994 Correlation of Two Binary Characters |                               |               |                  |
|------------------|----------|---------------------------------------------------|-------------------------------|---------------|------------------|
| Binary Variables | <i>N</i> | Midford and Maddison Method<br>Call Behavior      |                               |               |                  |
|                  |          | Dependent<br>log- <i>LH</i>                       | Independent<br>log- <i>LH</i> | $2*\Delta LH$ | <i>P</i> -value* |
| Alkaloid         | 83       | -61.99066                                         | -66.76505                     | 9.54877       | <b>0.015</b>     |
| TCS3             | 146      | -123.56906                                        | -134.54857                    | 10.97951      | <b>&lt;0.001</b> |
| TCS4             | 146      | -119.53305                                        | -119.53305                    | 12.94026      | <b>0.020</b>     |
| TCS5             | 146      | -116.82326                                        | -123.34971                    | 13.05291      | <b>0.006</b>     |
| TCS6             | 146      | -126.26347                                        | -133.44236                    | 14.35778      | <b>&lt;0.001</b> |
| TCS7             | 146      | -115.55913                                        | -122.48985                    | 13.86145      | <b>&lt;0.001</b> |
| TCS8             | 146      | -105.10623                                        | -108.91964                    | 7.62682       | 0.060            |

\* *P*-value from 1000 simulations.

Table S3 (Cont.) Correlation matrices for the long (169 taxa) dataset of call and other life history traits of poison frogs used for the Phylogenetic Principal Component Analyses (PPCAs) of the poison frog call.

Best-IC model for each pairwise correlation (Independent Contrasts,  $N = 168$ )

| Model                  | OU      | $\lambda$ | $\lambda$ | $\lambda$ | $\lambda$ | OU      | $\lambda$ | $\lambda$ | OU      | OU      | $\lambda$ | $\lambda$ | $\lambda$ | $\lambda$ | OU     | OU      | OU     | $\lambda$ |
|------------------------|---------|-----------|-----------|-----------|-----------|---------|-----------|-----------|---------|---------|-----------|-----------|-----------|-----------|--------|---------|--------|-----------|
| Variables <sup>a</sup> | SVL     | Temp      | IniDur    | IniInt    | MidDur    | MidInt  | MidRise   | MidShape  | MidDuty | MidRate | IniQ1     | IniPeak   | IniQ3     | IniFreq   | MidQ1  | MidPeak | MidQ3  | MidFreq   |
| SVL                    | 1.0000  |           |           |           |           |         |           |           |         |         |           |           |           |           |        |         |        |           |
| Temp                   | -0.1217 | 1.0000    |           |           |           |         |           |           |         |         |           |           |           |           |        |         |        |           |
| IniDur                 | 0.2099  | -0.0947   | 1.0000    |           |           |         |           |           |         |         |           |           |           |           |        |         |        |           |
| IniInt                 | 0.0057  | -0.1896   | 0.6737    | 1.0000    |           |         |           |           |         |         |           |           |           |           |        |         |        |           |
| MidDur                 | 0.2355  | -0.0934   | 0.9558    | 0.6956    | 1.0000    |         |           |           |         |         |           |           |           |           |        |         |        |           |
| MidInt                 | -0.0208 | -0.1988   | 0.6609    | 0.9322    | 0.6918    | 1.0000  |           |           |         |         |           |           |           |           |        |         |        |           |
| MidRise                | 0.2037  | -0.0435   | 0.8562    | 0.5567    | 0.8494    | 0.5620  | 1.0000    |           |         |         |           |           |           |           |        |         |        |           |
| MidShape               | 0.0444  | 0.0801    | 0.0160    | -0.1732   | -0.0418   | -0.1695 | 0.4069    | 1.0000    |         |         |           |           |           |           |        |         |        |           |
| MidDuty                | 0.2216  | 0.1462    | -0.1606   | -0.6855   | -0.1731   | -0.7426 | -0.1514   | 0.1296    | 1.0000  |         |           |           |           |           |        |         |        |           |
| MidRate                | 0.0112  | 0.1885    | -0.6659   | -0.9257   | -0.7017   | -0.9960 | -0.5672   | 0.1904    | 0.7273  | 1.0000  |           |           |           |           |        |         |        |           |
| IniQ1                  | -0.7431 | 0.1908    | -0.2762   | -0.0685   | -0.3026   | -0.0424 | -0.2691   | -0.1067   | -0.2051 | 0.0469  | 1.0000    |           |           |           |        |         |        |           |
| IniPeak                | -0.7499 | 0.2068    | -0.2646   | -0.0859   | -0.2968   | -0.0589 | -0.2467   | -0.0670   | -0.1921 | 0.0651  | 0.9934    | 1.0000    |           |           |        |         |        |           |
| IniQ3                  | -0.7422 | 0.2091    | -0.2726   | -0.0866   | -0.3029   | -0.0523 | -0.2578   | -0.0673   | -0.2026 | 0.0585  | 0.9893    | 0.9938    | 1.0000    |           |        |         |        |           |
| IniFreq                | -0.1044 | 0.1978    | 0.0424    | -0.0738   | 0.0248    | -0.0217 | 0.0837    | 0.1891    | 0.0238  | 0.0267  | 0.1053    | 0.1724    | 0.2307    | 1.0000    |        |         |        |           |
| MidQ1                  | -0.7175 | 0.1748    | -0.3205   | -0.1303   | -0.3357   | -0.1193 | -0.2842   | -0.0854   | -0.1765 | 0.1251  | 0.9516    | 0.9477    | 0.9426    | 0.0966    | 1.0000 |         |        |           |
| MidPeak                | -0.7255 | 0.1995    | -0.3147   | -0.1444   | -0.3318   | -0.1294 | -0.2597   | -0.0323   | -0.1725 | 0.1368  | 0.9466    | 0.9504    | 0.9471    | 0.1518    | 0.9932 | 1.0000  |        |           |
| MidQ3                  | -0.7267 | 0.2094    | -0.3188   | -0.1478   | -0.3323   | -0.1261 | -0.2747   | -0.0458   | -0.1782 | 0.1332  | 0.9430    | 0.9462    | 0.9494    | 0.1870    | 0.9881 | 0.9949  | 1.0000 |           |
| MidFreq                | -0.1622 | 0.2517    | 0.0530    | -0.0604   | 0.0725    | -0.0005 | 0.1067    | 0.2148    | 0.0074  | 0.0114  | 0.1223    | 0.1669    | 0.2162    | 0.7701    | 0.0989 | 0.1715  | 0.2264 | 1.0000    |
| IC-Std                 | 0.0444  | 0.0134    | 0.0152    | 0.2739    | 0.0161    | 0.3716  | 0.0099    | 0.0203    | 0.0818  | 0.1852  | 0.2014    | 0.2043    | 0.2079    | 0.0467    | 0.3885 | 0.3885  | 0.3905 | 0.0491    |

<sup>a</sup> Snout Vent Length: SVL, Temperature: Temp, Initial Pulse-Note Duration: IniDur, Interval between Initial Pulse-Notes: IniInt, Middle Pulse-Note Duration: MidDur, Interval between Middle Pulse-Notes: MidInt, Middle Pulse-Note Rise Time: MidRise, Middle Pulse-Note Shape: MidShape, Middle Pulse-Note Duty: MidDuty, Middle Pulse-Note Rate: MidRate, Initial Q1: IniQ1, Initial Peak Frequency: IniPeak, Initial Q3: IniQ3, Initial Modulation (Q1 – Q3): IniFreq, Middle Q1: MidQ1, Middle Peak Frequency: MidPeak, Middle Q3: MidQ3, Middle Modulation (Q1 – Q3): MidFreq, and IC-Standard Deviations: IC-Std.

Table S3 (Cont.) Correlation matrices for the long (169 taxa) dataset of call and other life history traits of poison frogs used for the Phylogenetic Principal Component Analyses (PPCAs) of the poison frog call.

Lambda-IC model for each pairwise correlation (Independent Contrasts,  $N = 168$ )

| Variables <sup>a</sup> | SVL     | Temp    | IniDur  | IniInt  | MidDur  | MidInt  | MidRise | MidShape | MidDuty | MidRate | IniQ1  | IniPeak | IniQ3  | IniFreq | MidQ1  | MidPeak | MidQ3  | MidFreq |
|------------------------|---------|---------|---------|---------|---------|---------|---------|----------|---------|---------|--------|---------|--------|---------|--------|---------|--------|---------|
| SVL                    | 1.0000  |         |         |         |         |         |         |          |         |         |        |         |        |         |        |         |        |         |
| Temp                   | -0.1165 | 1.0000  |         |         |         |         |         |          |         |         |        |         |        |         |        |         |        |         |
| IniDur                 | 0.2433  | -0.0947 | 1.0000  |         |         |         |         |          |         |         |        |         |        |         |        |         |        |         |
| IniInt                 | 0.0274  | -0.1896 | 0.6737  | 1.0000  |         |         |         |          |         |         |        |         |        |         |        |         |        |         |
| MidDur                 | 0.2747  | -0.0934 | 0.9558  | 0.6956  | 1.0000  |         |         |          |         |         |        |         |        |         |        |         |        |         |
| MidInt                 | 0.0076  | -0.1688 | 0.6649  | 0.9480  | 0.6992  | 1.0000  |         |          |         |         |        |         |        |         |        |         |        |         |
| MidRise                | 0.2366  | -0.0435 | 0.8562  | 0.5567  | 0.8494  | 0.5646  | 1.0000  |          |         |         |        |         |        |         |        |         |        |         |
| MidShape               | 0.0359  | 0.0801  | 0.0160  | -0.1732 | -0.0418 | -0.1596 | 0.4069  | 1.0000   |         |         |        |         |        |         |        |         |        |         |
| MidDuty                | 0.2115  | 0.1312  | -0.1562 | -0.6933 | -0.1710 | -0.7428 | -0.1323 | 0.1449   | 1.0000  |         |        |         |        |         |        |         |        |         |
| MidRate                | -0.0185 | 0.1596  | -0.6697 | -0.9401 | -0.7093 | -0.9956 | -0.5697 | 0.1813   | 0.7242  | 1.0000  |        |         |        |         |        |         |        |         |
| IniQ1                  | -0.7585 | 0.1908  | -0.2762 | -0.0685 | -0.3026 | -0.0457 | -0.2691 | -0.1067  | -0.1958 | 0.0508  | 1.0000 |         |        |         |        |         |        |         |
| IniPeak                | -0.7655 | 0.2068  | -0.2646 | -0.0859 | -0.2968 | -0.0624 | -0.2467 | -0.0670  | -0.1859 | 0.0693  | 0.9934 | 1.0000  |        |         |        |         |        |         |
| IniQ3                  | -0.7565 | 0.2091  | -0.2726 | -0.0866 | -0.3029 | -0.0548 | -0.2578 | -0.0673  | -0.1955 | 0.0616  | 0.9893 | 0.9938  | 1.0000 |         |        |         |        |         |
| IniFreq                | -0.1000 | 0.1978  | 0.0424  | -0.0738 | 0.0248  | -0.0079 | 0.0837  | 0.1891   | 0.0068  | 0.0122  | 0.1053 | 0.1724  | 0.2307 | 1.0000  |        |         |        |         |
| MidQ1                  | -0.7314 | 0.1721  | -0.3236 | -0.1293 | -0.3434 | -0.1089 | -0.2944 | -0.0737  | -0.1469 | 0.1161  | 0.9820 | 0.9781  | 0.9734 | 0.1172  | 1.0000 |         |        |         |
| MidPeak                | -0.7390 | 0.1975  | -0.3150 | -0.1437 | -0.3370 | -0.1187 | -0.2653 | -0.0167  | -0.1431 | 0.1281  | 0.9758 | 0.9806  | 0.9774 | 0.1735  | 0.9923 | 1.0000  |        |         |
| MidQ3                  | -0.7399 | 0.2055  | -0.3200 | -0.1477 | -0.3386 | -0.1179 | -0.2826 | -0.0336  | -0.1474 | 0.1273  | 0.9737 | 0.9773  | 0.9807 | 0.2049  | 0.9882 | 0.9951  | 1.0000 |         |
| MidFreq                | -0.1640 | 0.2517  | 0.0530  | -0.0604 | 0.0725  | 0.0033  | 0.1067  | 0.2148   | 0.0188  | 0.0076  | 0.1223 | 0.1669  | 0.2162 | 0.7701  | 0.1152 | 0.1904  | 0.2426 | 1.0000  |
| IC Std                 | 0.0213  | 0.0134  | 0.0152  | 0.2739  | 0.0161  | 0.2892  | 0.0099  | 0.0203   | 0.0440  | 0.1475  | 0.2014 | 0.2043  | 0.2079 | 0.0467  | 0.2116 | 0.2133  | 0.2162 | 0.0491  |

<sup>a</sup> Snout Vent Length: SVL, Temperature: Temp, Initial Pulse-Note Duration: IniDur, Interval between Initial Pulse-Notes: IniInt, Middle Pulse-Note Duration: MidDur, Interval between Middle Pulse-Notes: MidInt, Middle Pulse-Note Rise Time: MidRise, Middle Pulse-Note Shape: MidShape, Middle Pulse-Note Duty: MidDuty, Middle Pulse-Note Rate: MidRate, Initial Q1: IniQ1, Initial Peak Frequency: IniPeak, Initial Q3: IniQ3, Initial Modulation (Q1 – Q3): IniFreq, Middle Q1: MidQ1, Middle Peak Frequency: MidPeak, Middle Q3: MidQ3, Middle Modulation (Q1 – Q3): MidFreq, and IC-Standard Deviations: IC-Std.



Table S3 (Cont.) Component loadings, communalities ( $h^2$ ), and percent of variance explained of non-phylogenetic principal component analysis (PCA), phylogenetic principal component analysis using independent contrasts estimated with models of character evolution (PPCA-Best Model PICs), and phylogenetic principal component analysis using independent contrasts estimated with lambda-model of character evolution (PPCA-Lambda PICs).

| Variables              | PCA           |               |              |       | PPCA-Best Model PICs |               |              |       | PPCA-Lambda PICs |               |              |       |
|------------------------|---------------|---------------|--------------|-------|----------------------|---------------|--------------|-------|------------------|---------------|--------------|-------|
|                        | Comp-1        | Comp-2        | Comp-3       | $h^2$ | Comp-1               | Comp-2        | Comp-3       | $h^2$ | Comp-1           | Comp-2        | Comp-3       | $h^2$ |
| SVL                    | <b>-0.860</b> | 0.112         | -0.083       | 0.759 | <b>-0.801</b>        | -0.008        | -0.026       | 0.643 | <b>-0.808</b>    | 0.023         | -0.015       | 0.653 |
| Temp                   | 0.096         | -0.087        | <b>0.571</b> | 0.342 | 0.178                | -0.160        | <b>0.423</b> | 0.236 | 0.176            | -0.145        | <b>0.413</b> | 0.222 |
| IniDur                 | -0.196        | <b>0.929</b>  | -0.094       | 0.909 | -0.285               | <b>0.822</b>  | 0.194        | 0.794 | -0.289           | <b>0.819</b>  | 0.196        | 0.793 |
| IniInt                 | 0.032         | <b>0.907</b>  | -0.356       | 0.951 | -0.005               | <b>0.929</b>  | -0.204       | 0.905 | -0.006           | <b>0.936</b>  | -0.209       | 0.920 |
| MidDur                 | -0.206        | <b>0.934</b>  | -0.088       | 0.922 | -0.301               | <b>0.838</b>  | 0.169        | 0.821 | -0.308           | <b>0.837</b>  | 0.170        | 0.824 |
| MidInt                 | 0.052         | <b>0.925</b>  | -0.335       | 0.971 | 0.026                | <b>0.954</b>  | -0.175       | 0.942 | 0.025            | <b>0.959</b>  | -0.162       | 0.946 |
| MidRise                | -0.246        | <b>0.883</b>  | 0.102        | 0.850 | -0.280               | <b>0.741</b>  | 0.368        | 0.762 | -0.289           | <b>0.734</b>  | 0.374        | 0.763 |
| MidShape               | -0.173        | -0.288        | <b>0.560</b> | 0.427 | -0.134               | -0.069        | <b>0.552</b> | 0.328 | -0.130           | -0.072        | <b>0.558</b> | 0.333 |
| MidDuty                | -0.296        | <b>-0.579</b> | 0.361        | 0.553 | -0.323               | <b>-0.637</b> | 0.303        | 0.602 | -0.305           | <b>-0.636</b> | 0.313        | 0.596 |
| MidRate                | -0.053        | <b>-0.925</b> | 0.335        | 0.970 | -0.018               | <b>-0.953</b> | 0.180        | 0.941 | -0.016           | <b>-0.957</b> | 0.166        | 0.943 |
| IniQ1                  | <b>0.992</b>  | 0.008         | 0.002        | 0.984 | <b>0.977</b>         | -0.054        | 0.012        | 0.957 | <b>0.984</b>     | -0.050        | 0.012        | 0.972 |
| IniPeak                | <b>0.990</b>  | -0.017        | 0.078        | 0.986 | <b>0.974</b>         | -0.057        | 0.079        | 0.959 | <b>0.982</b>     | -0.053        | 0.078        | 0.974 |
| IniQ3                  | <b>0.987</b>  | -0.045        | 0.119        | 0.990 | <b>0.975</b>         | -0.054        | 0.113        | 0.966 | <b>0.982</b>     | -0.050        | 0.112        | 0.980 |
| IniFreq                | 0.232         | -0.237        | <b>0.826</b> | 0.793 | 0.148                | 0.051         | <b>0.780</b> | 0.632 | 0.154            | 0.057         | <b>0.773</b> | 0.625 |
| MidQ1                  | <b>0.985</b>  | -0.044        | 0.012        | 0.973 | <b>0.965</b>         | -0.116        | 0.013        | 0.945 | <b>0.973</b>     | -0.111        | 0.027        | 0.960 |
| MidPeak                | <b>0.983</b>  | -0.061        | 0.091        | 0.979 | <b>0.964</b>         | -0.116        | 0.087        | 0.951 | <b>0.971</b>     | -0.110        | 0.105        | 0.966 |
| MidQ3                  | <b>0.981</b>  | -0.075        | 0.130        | 0.985 | <b>0.965</b>         | -0.115        | 0.115        | 0.958 | <b>0.972</b>     | -0.111        | 0.129        | 0.974 |
| MidFreq                | 0.235         | -0.132        | <b>0.859</b> | 0.811 | 0.164                | 0.077         | <b>0.803</b> | 0.679 | 0.167            | 0.075         | <b>0.803</b> | 0.678 |
| Variance explained (%) | 38.676        | 30.960        | 14.567       |       | 37.456               | 28.342        | 12.084       |       | 38.011           | 28.361        | 12.076       |       |

**Bold** indicates component loadings > 0.400 and < -0.400. Variable identification; Snout Vent Length: SVL, Temperature: Temp, Initial Pulse-Note Duration: IniDur, Interval between Initial Pulse-Notes: IniInt, Middle Pulse-Note Duration: MidDur, Interval between Middle Pulse-Notes: MidInt, Middle Pulse-Note Rise Time: MidRise, Middle Pulse-Note Shape: MidShape, Middle Pulse-Note Duty: MidDuty, Middle Pulse-Note Rate: MidRate, Initial Q1: IniQ1, Initial Peak Frequency: IniPeak, Initial Q3: IniQ3, Initial Modulation (Q1 – Q3): IniFreq, Middle Q1: MidQ1, Middle Peak Frequency: MidPeak, Middle Q3: MidQ3, and Middle Modulation (Q1 – Q3): MidFreq

Table S3 (Cont.) Phylogenetic signal and model of character evolution of the poison frog call parameters with metabolic data.

| Trait ( $N = 52$ )                   | Lambda ( $\lambda$ ) |                         | Blomberg <i>et al.</i> 's $K$ |                         | White Noise Model |          | BM Model |          | OU Model |          | Lambda Model |          | Best Model |
|--------------------------------------|----------------------|-------------------------|-------------------------------|-------------------------|-------------------|----------|----------|----------|----------|----------|--------------|----------|------------|
|                                      | Estimate             | $P$ -value <sup>a</sup> | Estimate                      | $P$ -value <sup>b</sup> | $\ln$ -L          | AICc     | $\ln$ -L | AICc     | $\ln$ -L | AICc     | $\ln$ -L     | AICc     |            |
| RMR-Mass Specific                    | 0.525                | 0.100                   | 0.318                         | 0.017                   | 24.003            | -43.757  | 16.409   | -28.569  | 26.883   | -47.255  | 25.354       | -44.197  | OU         |
| AMR-Mass Specific                    | 0.676                | <0.001                  | 0.441                         | 0.001                   | 23.267            | -42.284  | 21.823   | -39.396  | 29.577   | -52.643  | 31.220       | -55.929  | Lambda     |
| Scope (AMR - RMR) -Mass Specific     | 0.644                | <0.001                  | 0.427                         | 0.001                   | 17.007            | -29.765  | 14.475   | -24.699  | 22.546   | -38.582  | 25.217       | -43.923  | Lambda     |
| Body Mass                            | 0.631                | 0.001                   | 0.331                         | 0.011                   | -19.418           | 42.836   | -26.653  | 57.555   | -15.708  | 37.926   | -13.954      | 34.418   | Lambda     |
| SVL                                  | 0.600                | 0.003                   | 0.277                         | 0.052                   | 39.264            | -74.278  | 27.688   | -51.127  | 41.169   | -75.828  | 43.697       | -80.883  | Lambda     |
| Temperature                          | 0.293                | 0.069                   | 0.218                         | 0.255                   | 55.130            | -106.011 | 37.549   | -70.848  | 56.067   | -105.624 | 56.783       | -107.056 | No Signal  |
| Initial Pulse-Note Duration          | 0.977                | <0.001                  | 0.976                         | <0.001                  | 60.281            | -116.312 | 79.983   | -155.716 | 80.835   | -155.160 | 80.286       | -154.062 | BM         |
| Interval between Initial Pulse-Notes | 0.934                | <0.001                  | 0.836                         | <0.001                  | -90.259           | 184.768  | -74.754  | 153.757  | -73.020  | 152.550  | -73.235      | 152.981  | BM         |
| Middle Pulse-Note Duration           | 0.989                | <0.001                  | 1.065                         | <0.001                  | 60.072            | -115.894 | 82.121   | -159.991 | 82.763   | -159.016 | 82.190       | -157.869 | BM         |
| Interval between Middle Pulse-Notes  | 0.991                | <0.001                  | 0.980                         | <0.001                  | -85.871           | 175.992  | -65.865  | 135.981  | -65.235  | 136.981  | -65.798      | 138.107  | BM         |
| Middle Pulse-Note Rise Time          | 0.981                | <0.001                  | 0.873                         | <0.001                  | 85.469            | -166.688 | 102.668  | -201.085 | 103.737  | -200.964 | 102.908      | -199.305 | BM         |
| Middle Pulse-Note Shape              | 0.830                | <0.001                  | 0.593                         | <0.001                  | 39.061            | -73.871  | 46.916   | -89.582  | 51.560   | -96.610  | 51.670       | -96.829  | Lambda/OU  |
| Middle Pulse-Note Duty               | 0.821                | 0.007                   | 0.421                         | 0.002                   | 16.109            | -27.968  | 15.592   | -26.935  | 20.878   | -35.245  | 19.710       | -32.909  | Lambda/OU  |
| Middle Pulse-Note Rate               | 0.986                | <0.001                  | 1.040                         | <0.001                  | -53.026           | 110.302  | -31.605  | 67.460   | -30.947  | 68.404   | -31.451      | 69.414   | BM         |
| Initial Q1                           | 0.597                | 0.004                   | 0.255                         | 0.078                   | -71.905           | 148.059  | -85.612  | 175.475  | -71.409  | 149.328  | -67.793      | 142.096  | Lambda     |
| Initial Peak Frequency               | 0.614                | 0.007                   | 0.262                         | 0.070                   | -72.557           | 149.365  | -85.782  | 175.814  | -72.085  | 150.681  | -68.951      | 144.413  | Lambda     |
| Initial Q3                           | 0.610                | 0.007                   | 0.261                         | 0.063                   | -72.511           | 149.272  | -85.998  | 176.246  | -72.060  | 150.632  | -68.894      | 144.299  | Lambda     |
| Initial Modulation (Q1 – Q3)         | 0.791                | <0.001                  | 0.626                         | <0.001                  | -9.990            | 24.229   | -3.536   | 11.322   | -0.247   | 7.004    | 2.655        | 1.200    | Lambda     |
| Middle Q1                            | 0.654                | 0.001                   | 0.317                         | 0.013                   | -74.496           | 153.241  | -82.669  | 169.588  | -71.721  | 149.952  | -69.076      | 144.662  | Lambda     |
| Middle Peak Frequency                | 0.666                | 0.002                   | 0.320                         | 0.013                   | -74.402           | 153.053  | -82.611  | 169.473  | -71.735  | 149.980  | -69.385      | 145.281  | Lambda     |
| Middle Q3                            | 0.675                | 0.001                   | 0.322                         | 0.012                   | -74.667           | 153.584  | -82.899  | 170.048  | -71.948  | 150.407  | -69.395      | 145.300  | Lambda     |
| Middle Modulation (Q1 – Q3)          | 0.738                | <0.001                  | 0.543                         | <0.001                  | -11.867           | 27.983   | -8.774   | 21.798   | -4.339   | 15.188   | -1.123       | 8.757    | Lambda     |
| PC1-Scale (Spectral Features)        | 0.648                | 0.001                   | 0.291                         | 0.029                   | -76.294           | 156.839  | -86.650  | 177.550  | -74.525  | 155.560  | -71.102      | 148.715  | Lambda     |
| PC2 -Temporal Features               | 0.999                | <0.001                  | 1.005                         | <0.001                  | -73.484           | 151.217  | -52.362  | 108.973  | -51.903  | 110.318  | -52.361      | 111.234  | BM         |
| PC3-Temperature and Modulation       | 0.872                | <0.001                  | 0.636                         | <0.001                  | -78.709           | 161.669  | -70.139  | 144.529  | -68.100  | 142.710  | -67.299      | 141.109  | Lambda/OU  |

<sup>a</sup>  $P$ -value of rejecting  $H_0: \lambda = 0$  (no phylogenetic signal).

<sup>b</sup>  $P$ -value of the observed  $K$  is significantly higher than the random values.

Table S3 (Cont.) Phylogenetic regressions of mass-specific metabolic rates on poison frog call parameters, body size (snout vent length, SVL), and principal components. In bold, traits with significant values.

| Traits                                   | Body Mass |                      |                       |                  |               |                  | RMR-Mass Specific |                     |                       |                  |               |                  | AMR-Mass Specific |                      |                       |                 |               |                 |
|------------------------------------------|-----------|----------------------|-----------------------|------------------|---------------|------------------|-------------------|---------------------|-----------------------|------------------|---------------|------------------|-------------------|----------------------|-----------------------|-----------------|---------------|-----------------|
|                                          | <i>N</i>  | $\lambda^a$          | $\beta_1 \pm SE$      | <i>P</i> -value  | <i>r</i>      | <i>P</i> -value  | <i>N</i>          | $\lambda^a$         | $\beta_1 \pm SE$      | <i>P</i> -value  | <i>r</i>      | <i>P</i> -value  | <i>N</i>          | $\lambda^a$          | $\beta_1 \pm SE$      | <i>P</i> -value | <i>r</i>      | <i>P</i> -value |
| SVL                                      | 51        | 0.029 <sup>NS</sup>  | <b>2.905 ± 0.142</b>  | <b>&lt;0.001</b> | <b>0.946</b>  | <b>&lt;0.001</b> | 52                | 0.000 <sup>NS</sup> | <b>-0.634 ± 0.167</b> | <b>&lt;0.001</b> | <b>-0.473</b> | <b>&lt;0.001</b> | 52                | 0.550 <sup>***</sup> | <b>-0.465 ± 0.168</b> | <b>0.008</b>    | <b>-0.364</b> | <b>0.001</b>    |
| Initial Pulse-Note Duration              | 51        | 0.628 <sup>**</sup>  | 1.413 ± 0.771         | 0.073            | 0.253         | 0.043            | 52                | 0.511 <sup>*</sup>  | -0.451 ± 0.362        | 0.219            | -0.174        | 0.222            | 51                | 0.605 <sup>*</sup>   | -0.549 ± 0.331        | 0.104           | -0.230        | 0.074           |
| Interval between Initial Pulse-Notes     | 51        | 0.621 <sup>**</sup>  | -0.012 ± 0.043        | 0.773            | -0.041        | 0.919            | 52                | 0.539 <sup>NS</sup> | 0.011 ± 0.020         | 0.583            | 0.078         | 0.739            | 52                | 0.652 <sup>**</sup>  | -0.007 ± 0.018        | 0.722           | -0.051        | 0.880           |
| Middle Pulse-Note Duration               | 51        | 0.638 <sup>***</sup> | 1.413 ± 0.799         | 0.083            | 0.245         | 0.053            | 52                | 0.519 <sup>*</sup>  | -0.454 ± 0.373        | 0.230            | -0.169        | 0.238            | 51                | 0.580 <sup>*</sup>   | -0.599 ± 0.336        | 0.081           | -0.247        | 0.050           |
| Interval between Middle Pulse-Notes      | 51        | 0.621 <sup>**</sup>  | -0.019 ± 0.047        | 0.691            | -0.057        | 0.852            | 52                | 0.551 <sup>NS</sup> | 0.020 ± 0.022         | 0.360            | 0.130         | 0.432            | 52                | 0.640 <sup>**</sup>  | -0.012 ± 0.020        | 0.540           | -0.087        | 0.685           |
| Middle Pulse-Note Rise Time              | 51        | 0.640 <sup>***</sup> | 2.164 ± 1.208         | 0.079            | 0.248         | 0.042            | 52                | 0.493 <sup>NS</sup> | -0.683 ± 0.565        | 0.233            | -0.168        | 0.242            | 51                | 0.599 <sup>*</sup>   | -0.929 ± 0.511        | 0.075           | -0.252        | 0.045           |
| Middle Pulse-Note Shape                  | 51        | 0.625 <sup>**</sup>  | 0.311 ± 0.490         | 0.529            | 0.090         | 0.671            | 52                | 0.510 <sup>NS</sup> | -0.037 ± 0.229        | 0.874            | -0.023        | 0.975            | 52                | 0.714 <sup>***</sup> | -0.230 ± 0.206        | 0.270           | -0.156        | 0.300           |
| Middle Pulse-Note Duty                   | 52        | 0.640 <sup>***</sup> | 0.471 ± 0.260         | 0.077            | 0.248         | 0.046            | 52                | 0.456 <sup>NS</sup> | <b>-0.284 ± 0.118</b> | <b>0.020</b>     | <b>-0.321</b> | <b>0.006</b>     | 51                | 0.718 <sup>***</sup> | -0.169 ± 0.118        | 0.159           | -0.200        | 0.140           |
| Middle Pulse-Note Rate                   | 51        | 0.621 <sup>**</sup>  | 0.035 ± 0.092         | 0.704            | 0.054         | 0.865            | 52                | 0.545 <sup>NS</sup> | -0.039 ± 0.042        | 0.361            | -0.129        | 0.433            | 52                | 0.647 <sup>**</sup>  | 0.019 ± 0.039         | 0.626           | 0.069         | 0.787           |
| Initial Q1                               | 52        | 0.560 <sup>**</sup>  | <b>-0.301 ± 0.027</b> | <b>&lt;0.001</b> | <b>-0.845</b> | <b>&lt;0.001</b> | 52                | 0.000 <sup>NS</sup> | <b>0.062 ± 0.021</b>  | <b>0.004</b>     | <b>0.390</b>  | <b>&lt;0.001</b> | 52                | 0.603 <sup>***</sup> | 0.041 ± 0.020         | 0.051           | 0.272         | 0.024           |
| Initial Peak Frequency                   | 52        | 0.444 <sup>NS</sup>  | <b>-0.294 ± 0.027</b> | <b>&lt;0.001</b> | <b>-0.842</b> | <b>&lt;0.001</b> | 52                | 0.000 <sup>NS</sup> | <b>0.060 ± 0.020</b>  | <b>0.005</b>     | <b>0.387</b>  | <b>&lt;0.001</b> | 52                | 0.587 <sup>***</sup> | <b>0.042 ± 0.020</b>  | <b>0.041</b>    | <b>0.285</b>  | <b>0.017</b>    |
| Initial Q3                               | 52        | 0.427 <sup>NS</sup>  | <b>-0.296 ± 0.026</b> | <b>&lt;0.001</b> | <b>-0.847</b> | <b>&lt;0.001</b> | 52                | 0.000 <sup>NS</sup> | <b>0.060 ± 0.020</b>  | <b>0.005</b>     | <b>0.385</b>  | <b>&lt;0.001</b> | 52                | 0.572 <sup>***</sup> | <b>0.045 ± 0.020</b>  | <b>0.025</b>    | <b>0.310</b>  | <b>0.008</b>    |
| Initial Modulation (Q1 – Q3)             | 51        | 0.609 <sup>**</sup>  | -0.066 ± 0.190        | 0.730            | -0.050        | 0.886            | 52                | 0.526 <sup>NS</sup> | 0.002 ± 0.089         | 0.980            | 0.001         | 0.999            | 52                | 0.614 <sup>*</sup>   | 0.137 ± 0.078         | 0.090           | 0.239         | 0.057           |
| Middle Q1                                | 52        | 0.350 <sup>NS</sup>  | <b>-0.295 ± 0.026</b> | <b>&lt;0.001</b> | <b>-0.851</b> | <b>&lt;0.001</b> | 52                | 0.000 <sup>NS</sup> | <b>0.059 ± 0.020</b>  | <b>0.004</b>     | <b>0.390</b>  | <b>&lt;0.001</b> | 52                | 0.594 <sup>***</sup> | 0.039 ± 0.020         | 0.056           | 0.266         | 0.029           |
| Middle Peak Frequency                    | 52        | 0.190 <sup>NS</sup>  | <b>-0.297 ± 0.025</b> | <b>&lt;0.001</b> | <b>-0.860</b> | <b>&lt;0.001</b> | 52                | 0.000 <sup>NS</sup> | <b>0.056 ± 0.020</b>  | <b>0.006</b>     | <b>0.374</b>  | <b>&lt;0.001</b> | 52                | 0.576 <sup>***</sup> | <b>0.041 ± 0.020</b>  | <b>0.043</b>    | <b>0.281</b>  | <b>0.019</b>    |
| Middle Q3                                | 52        | 0.000 <sup>NS</sup>  | <b>-0.304 ± 0.023</b> | <b>&lt;0.001</b> | <b>-0.881</b> | <b>&lt;0.001</b> | 52                | 0.000 <sup>NS</sup> | <b>0.057 ± 0.020</b>  | <b>0.006</b>     | <b>0.378</b>  | <b>&lt;0.001</b> | 52                | 0.559 <sup>***</sup> | <b>0.043 ± 0.019</b>  | <b>0.032</b>    | <b>0.298</b>  | <b>0.012</b>    |
| Middle Modulation (Q1 – Q3)              | 51        | 0.606 <sup>**</sup>  | -0.128 ± 0.179        | 0.477            | -0.102        | 0.602            | 52                | 0.476 <sup>NS</sup> | -0.061 ± 0.083        | 0.461            | -0.104        | 0.580            | 51                | 0.636 <sup>**</sup>  | 0.059 ± 0.076         | 0.443           | 0.110         | 0.554           |
| PC1-Size-Spectral (Morphology)           | 52        | 0.469 <sup>*</sup>   | <b>-0.293 ± 0.022</b> | <b>&lt;0.001</b> | <b>-0.880</b> | <b>&lt;0.001</b> | 52                | 0.000 <sup>NS</sup> | <b>0.063 ± 0.019</b>  | <b>0.001</b>     | <b>0.431</b>  | <b>&lt;0.001</b> | 52                | 0.585 <sup>***</sup> | <b>0.044 ± 0.019</b>  | <b>0.024</b>    | <b>0.312</b>  | <b>0.008</b>    |
| PC2-Fine-Temporal (Physiology)           | 51        | 0.618 <sup>**</sup>  | 0.017 ± 0.060         | 0.777            | 0.041         | 0.922            | 52                | 0.519 <sup>NS</sup> | -0.003 ± 0.028        | 0.906            | -0.017        | 0.968            | 52                | 0.637 <sup>**</sup>  | -0.019 ± 0.025        | 0.464           | -0.104        | 0.583           |
| PC3-Temperature-Modulation (Environment) | 51        | 0.630 <sup>**</sup>  | 0.036 ± 0.049         | 0.459            | 0.106         | 0.577            | 52                | 0.327 <sup>NS</sup> | -0.032 ± 0.022        | 0.146            | -0.204        | 0.124            | 51                | 0.673 <sup>***</sup> | 0.002 ± 0.021         | 0.927           | 0.013         | 0.992           |

<sup>a</sup> Significance of rejecting  $H_0: \lambda = 0$  (no phylogenetic signal). Significance is given by <sup>NS</sup>,  $P > 0.05$ ; <sup>\*</sup>,  $P < 0.05$ ; <sup>\*\*</sup>,  $P < 0.01$ ; <sup>\*\*\*</sup>,  $P < 0.001$ .

Table S4. Standard and phylogenetic logistic regression analyses between discrete binary variables (TCS3, TCS4, ..., TCS8 for coloration conspicuousness and ability to sequester alkaloids) and principal components.

| Standard Logistic Regression with Firth Correction |           |                 |                     |                 |                |                      |                          |                 |          |                |                      |                          |                 |          |                |                      |                             |                 |          |                |                      |
|----------------------------------------------------|-----------|-----------------|---------------------|-----------------|----------------|----------------------|--------------------------|-----------------|----------|----------------|----------------------|--------------------------|-----------------|----------|----------------|----------------------|-----------------------------|-----------------|----------|----------------|----------------------|
| Binary Var.                                        | Model Fit |                 | Intercept ( $b_0$ ) |                 |                |                      | PC1→Morphology ( $b_1$ ) |                 |          |                |                      | PC2→Physiology ( $b_2$ ) |                 |          |                |                      | PC3→Environmental ( $b_3$ ) |                 |          |                |                      |
|                                                    | $\chi^2$  | <i>P</i> -value | Value ± SE          | <i>P</i> -value | BTSP $\bar{X}$ | BTSP <i>P</i> -value | Value ± SE               | <i>P</i> -value | Odds %   | BTSP $\bar{X}$ | BTSP <i>P</i> -value | Value ± SE               | <i>P</i> -value | Odds %   | BTSP $\bar{X}$ | BTSP <i>P</i> -value | Value ± SE                  | <i>P</i> -value | Odds %   | BTSP $\bar{X}$ | BTSP <i>P</i> -value |
| Alkaloid                                           | 53.03     | <0.001          | -0.371 ± 0.282      | 0.190           | -0.363         | 0.182                | -1.200 ± 0.341           | <b>0.001</b>    | ↓ 69.869 | -1.207         | <0.001               | -2.244 ± 0.503           | <0.001          | ↓ 89.397 | -2.229         | <0.001               | -0.376 ± 0.318              | 0.240           | ↓ 31.347 | -0.386         | 0.228                |
| TCS3                                               | 18.66     | <0.001          | 0.831 ± 0.178       | <0.001          | 0.845          | <0.001               | -0.300 ± 0.174           | 0.086           | ↓ 25.936 | -0.308         | 0.074                | -0.679 ± 0.188           | <0.001          | ↓ 49.294 | -0.674         | <0.001               | 0.103 ± 0.179               | 0.564           | ↑ 10.872 | 0.101          | 0.570                |
| TCS4                                               | 37.38     | <0.001          | -0.017 ± 0.170      | 0.921           | -0.009         | 0.940                | -0.459 ± 0.175           | <b>0.010</b>    | ↓ 36.837 | -0.464         | <b>0.002</b>         | -0.889 ± 0.200           | <0.001          | ↓ 58.893 | -0.884         | <0.001               | 0.451 ± 0.186               | <b>0.016</b>    | ↑ 57.007 | 0.456          | <b>0.012</b>         |
| TCS5                                               | 45.16     | <0.001          | -0.286 ± 0.176      | 0.106           | -0.282         | 0.110                | -0.669 ± 0.189           | <b>0.001</b>    | ↓ 48.803 | -0.681         | <0.001               | -0.894 ± 0.207           | <0.001          | ↓ 59.108 | -0.892         | <0.001               | 0.575 ± 0.195               | <b>0.004</b>    | ↑ 77.679 | 0.576          | <b>0.002</b>         |
| TCS6                                               | 67.87     | <0.001          | -0.919 ± 0.210      | <0.001          | -0.914         | <0.001               | -0.757 ± 0.225           | <b>0.001</b>    | ↓ 53.081 | -0.766         | <0.001               | -1.347 ± 0.271           | <0.001          | ↓ 73.988 | -1.344         | <0.001               | 0.976 ± 0.244               | <0.001          | ↑ 165.28 | 0.984          | <0.001               |
| TCS7                                               | 14.09     | <b>0.003</b>    | -2.324 ± 0.312      | <0.001          | -2.330         | <0.001               | 0.128 ± 0.252            | 0.613           | ↑ 13.650 | 0.126          | 0.568                | -0.973 ± 0.303           | <b>0.002</b>    | ↓ 62.221 | -0.967         | <0.001               | -0.103 ± 0.251              | 0.682           | ↑ 9.817  | -0.104         | 0.692                |
| TCS8                                               | 11.42     | <b>0.010</b>    | -2.923 ± 0.426      | <0.001          | -2.920         | <0.001               | 0.079 ± 0.310            | 0.800           | ↑ 8.193  | 0.069          | 0.852                | -1.114 ± 0.395           | <b>0.005</b>    | ↓ 67.189 | -1.097         | <0.001               | -0.327 ± 0.307              | 0.288           | ↓ 27.868 | -0.315         | 0.292                |

| Phylogenetic Logistic Regression with Firth Correction |              |                 |                     |                 |                |                      |                          |                 |          |                |                      |                          |                 |          |                |                      |                             |                 |          |                |                      |
|--------------------------------------------------------|--------------|-----------------|---------------------|-----------------|----------------|----------------------|--------------------------|-----------------|----------|----------------|----------------------|--------------------------|-----------------|----------|----------------|----------------------|-----------------------------|-----------------|----------|----------------|----------------------|
| Binary Var.                                            | Phyl. Signal |                 | Intercept ( $b_0$ ) |                 |                |                      | PC1→Morphology ( $b_1$ ) |                 |          |                |                      | PC2→Physiology ( $b_2$ ) |                 |          |                |                      | PC3→Environmental ( $b_3$ ) |                 |          |                |                      |
|                                                        | <i>a</i>     | <i>P</i> -value | Value ± SE          | <i>P</i> -value | BTSP $\bar{X}$ | BTSP <i>P</i> -value | Value ± SE               | <i>P</i> -value | Odds %   | BTSP $\bar{X}$ | BTSP <i>P</i> -value | Value ± SE               | <i>P</i> -value | Odds %   | BTSP $\bar{X}$ | BTSP <i>P</i> -value | Value ± SE                  | <i>P</i> -value | Odds %   | BTSP $\bar{X}$ | BTSP <i>P</i> -value |
| Alkaloid                                               | 0.932        | 0.067           | -0.339 ± 0.849      | 0.691           | -0.395         | 0.690                | -0.806 ± 0.247           | <b>0.002</b>    | ↓ 55.314 | -0.951         | <b>0.024</b>         | -1.583 ± 0.388           | <0.001          | ↓ 79.456 | -1.867         | <b>0.018</b>         | 0.152 ± 0.256               | 0.553           | ↑ 16.443 | 0.196          | 0.568                |
| TCS3                                                   | -0.354       | <b>0.002</b>    | 0.745 ± 0.594       | 0.211           | 0.614          | 0.294                | 0.003 ± 0.178            | 0.984           | ↑ 0.348  | 0.011          | 0.924                | -0.481 ± 0.204           | <b>0.019</b>    | ↓ 38.196 | -0.492         | <b>0.016</b>         | 0.045 ± 0.173               | 0.798           | ↑ 4.550  | 0.049          | 0.760                |
| TCS4                                                   | 0.648        | <b>0.028</b>    | -0.280 ± 0.790      | 0.723           | -0.406         | 0.776                | -0.219 ± 0.143           | 0.128           | ↓ 19.685 | -0.285         | 0.158                | -0.573 ± 0.175           | <b>0.001</b>    | ↓ 43.617 | -0.748         | <b>0.008</b>         | 0.232 ± 0.150               | 0.124           | ↑ 26.154 | 0.300          | 0.138                |
| TCS5                                                   | 0.315        | <b>0.038</b>    | -0.912 ± 0.756      | 0.230           | -0.863         | 0.404                | -0.603 ± 0.201           | <b>0.003</b>    | ↓ 45.260 | -0.721         | <b>0.008</b>         | -0.542 ± 0.206           | <b>0.009</b>    | ↓ 41.818 | -0.650         | <b>0.012</b>         | 0.090 ± 0.170               | 0.598           | ↑ 9.405  | 0.092          | 0.614                |
| TCS6                                                   | -0.039       | <b>0.034</b>    | -1.309 ± 0.676      | 0.055           | -1.187         | 0.094                | -0.883 ± 0.246           | <0.001          | ↓ 58.642 | -0.922         | <b>0.002</b>         | -0.745 ± 0.246           | <b>0.003</b>    | ↓ 52.524 | -0.801         | <b>0.004</b>         | 0.404 ± 0.210               | 0.056           | ↑ 49.816 | 0.431          | 0.064                |
| TCS7                                                   | -2.438       | 0.135           | -2.415 ± 0.361      | <0.001          | -2.557         | <b>0.002</b>         | -0.050 ± 0.278           | 0.857           | ↓ 4.899  | -0.033         | 0.890                | -0.937 ± 0.324           | <b>0.004</b>    | ↓ 60.831 | -0.980         | <b>0.004</b>         | -0.084 ± 0.271              | 0.756           | ↓ 8.093  | -0.121         | 0.774                |
| TCS8                                                   | -3.176       | 0.265           | -2.956 ± 0.439      | <0.001          | -3.022         | <0.001               | -0.038 ± 0.320           | 0.907           | ↓ 3.685  | -0.019         | 0.864                | -1.084 ± 0.396           | <b>0.007</b>    | ↓ 66.176 | -1.058         | <b>0.014</b>         | -0.291 ± 0.311              | 0.350           | ↓ 25.232 | -0.299         | 0.354                |

\*BTSP are *P*-values estimated from bootstraps using a statistic derived from 1000 simulated data sets. See Ives and Garland (2010) Syst Biol 59:9-26.

Table S4 (Cont.) Standard and phylogenetic logistic regression analyses between discrete binary variables (TCS3, TCS4, ..., TCS8 for coloration conspicuousness and ability to sequester alkaloids) and continuous variables of call, body size (snout vent length, SVL), and external temperature.

| Standard Logistic Regression with Firth Correction |                |           |                   |                         |                 |           |                |                      |                    |                 |                |                      |                   |                 |                |                       |                   |                 |                |                      |
|----------------------------------------------------|----------------|-----------|-------------------|-------------------------|-----------------|-----------|----------------|----------------------|--------------------|-----------------|----------------|----------------------|-------------------|-----------------|----------------|-----------------------|-------------------|-----------------|----------------|----------------------|
| Binary Variables                                   | Call Variables | Model Fit |                   | Call Variable ( $b_1$ ) |                 |           |                | Intercept ( $b_0$ )  |                    |                 |                | SVL ( $b_2$ )        |                   |                 |                | Temperature ( $b_3$ ) |                   |                 |                |                      |
|                                                    |                | $\chi^2$  | <i>P</i> -value   | Value $\pm$ SE          | <i>P</i> -value | Odds %    | BTSP $\bar{X}$ | BTSP <i>P</i> -value | Value $\pm$ SE     | <i>P</i> -value | BTSP $\bar{X}$ | BTSP <i>P</i> -value | Value $\pm$ SE    | <i>P</i> -value | BTSP $\bar{X}$ | BTSP <i>P</i> -value  | Value $\pm$ SE    | <i>P</i> -value | BTSP $\bar{X}$ | BTSP <i>P</i> -value |
| Alkaloid                                           | IniDur         | 57.614    | <0.001            | -2.302 $\pm$ 0.482      | <0.001          | ↓ 89.989  | -2.306         | <0.001               | -0.405 $\pm$ 0.305 | 0.188           | -0.401         | 0.182                | 1.545 $\pm$ 0.376 | <0.001          | 1.567          | <0.001                | 0.039 $\pm$ 0.365 | 0.915           | 0.034          | 0.910                |
|                                                    | IniInt         | 42.021    | <0.001            | -1.953 $\pm$ 0.471      | <0.001          | ↓ 85.815  | -1.941         | <0.001               | -0.571 $\pm$ 0.307 | 0.066           | -0.569         | 0.038                | 0.981 $\pm$ 0.297 | 0.001           | 0.989          | <0.001                | 0.003 $\pm$ 0.319 | 0.993           | -0.003         | 0.986                |
|                                                    | MidDur         | 63.393    | <0.001            | -2.505 $\pm$ 0.526      | <0.001          | ↓ 91.829  | -2.506         | <0.001               | -0.411 $\pm$ 0.312 | 0.190           | -0.408         | 0.188                | 1.704 $\pm$ 0.424 | <0.001          | 1.724          | <0.001                | 0.075 $\pm$ 0.376 | 0.843           | 0.068          | 0.848                |
|                                                    | MidRise        | 58.742    | <0.001            | -2.494 $\pm$ 0.524      | <0.001          | ↓ 91.739  | -2.504         | <0.001               | -0.487 $\pm$ 0.305 | 0.114           | -0.476         | 0.124                | 1.601 $\pm$ 0.383 | <0.001          | 1.633          | <0.001                | 0.211 $\pm$ 0.324 | 0.515           | 0.210          | 0.492                |
|                                                    | MidShape       | 11.348    | 0.010             | 0.448 $\pm$ 0.214       | 0.039           | ↑ 56.560  | 0.458          | 0.022                | -0.126 $\pm$ 0.223 | 0.574           | -0.125         | 0.602                | 0.412 $\pm$ 0.200 | 0.042           | 0.426          | 0.032                 | 0.201 $\pm$ 0.238 | 0.401           | 0.189          | 0.420                |
|                                                    | MidDuty        | 6.744     | 0.081             | 0.134 $\pm$ 0.234       | 0.568           | ↑ 14.331  | 0.133          | 0.576                | -0.092 $\pm$ 0.219 | 0.676           | -0.087         | 0.686                | 0.393 $\pm$ 0.197 | 0.049           | 0.405          | 0.038                 | 0.223 $\pm$ 0.232 | 0.340           | 0.214          | 0.366                |
|                                                    | MidRate        | 43.637    | <0.001            | 2.013 $\pm$ 0.505       | <0.001          | ↑ 64.424  | 1.996          | <0.001               | -0.447 $\pm$ 0.291 | 0.128           | -0.448         | 0.108                | 1.019 $\pm$ 0.310 | 0.001           | 1.022          | <0.001                | 0.038 $\pm$ 0.327 | 0.907           | 0.036          | 0.956                |
|                                                    | IniPeak        | 6.558     | 0.087             | -0.162 $\pm$ 0.382      | 0.672           | ↓ 14.990  | -0.165         | 0.672                | -0.076 $\pm$ 0.217 | 0.727           | -0.072         | 0.722                | 0.271 $\pm$ 0.365 | 0.460           | 0.282          | 0.458                 | 0.249 $\pm$ 0.224 | 0.269           | 0.241          | 0.286                |
|                                                    | IniFreq        | 12.819    | 0.005             | 0.602 $\pm$ 0.256       | 0.021           | ↑ 82.666  | 0.610          | 0.014                | -0.185 $\pm$ 0.230 | 0.422           | -0.179         | 0.462                | 0.543 $\pm$ 0.219 | 0.015           | 0.559          | 0.008                 | 0.165 $\pm$ 0.243 | 0.498           | 0.151          | 0.540                |
|                                                    | MidPeak        | 6.613     | 0.085             | -0.182 $\pm$ 0.372      | 0.627           | ↓ 16.601  | -0.181         | 0.594                | -0.077 $\pm$ 0.217 | 0.724           | -0.074         | 0.696                | 0.256 $\pm$ 0.358 | 0.476           | 0.271          | 0.484                 | 0.248 $\pm$ 0.223 | 0.269           | 0.239          | 0.294                |
| MidFreq                                            | 6.576          | 0.087     | 0.105 $\pm$ 0.246 | 0.671                   | ↑ 11.059        | 0.112     | 0.658          | -0.091 $\pm$ 0.219   | 0.679              | -0.088          | 0.692          | 0.418 $\pm$ 0.201    | 0.040             | 0.433           | 0.034          | 0.230 $\pm$ 0.232     | 0.325             | 0.219           | 0.344          |                      |
| TCS3                                               | IniDur         | 21.834    | <0.001            | -0.740 $\pm$ 0.199      | <0.001          | ↓ 52.292  | -0.735         | <0.001               | 0.858 $\pm$ 0.181  | <0.001          | 0.871          | <0.001               | 0.602 $\pm$ 0.210 | 0.005           | 0.611          | <0.001                | 0.164 $\pm$ 0.184 | 0.376           | 0.169          | 0.366                |
|                                                    | IniInt         | 20.143    | <0.001            | -0.672 $\pm$ 0.191      | 0.001           | ↓ 48.930  | -0.664         | <0.001               | 0.832 $\pm$ 0.178  | <0.001          | 0.843          | <0.001               | 0.420 $\pm$ 0.192 | 0.030           | 0.425          | 0.016                 | 0.073 $\pm$ 0.187 | 0.698           | 0.083          | 0.702                |
|                                                    | MidDur         | 23.476    | <0.001            | -0.791 $\pm$ 0.205      | <0.001          | ↓ 54.674  | -0.784         | <0.001               | 0.873 $\pm$ 0.183  | <0.001          | 0.885          | <0.001               | 0.635 $\pm$ 0.215 | 0.004           | 0.643          | <0.001                | 0.175 $\pm$ 0.186 | 0.348           | 0.180          | 0.354                |
|                                                    | MidRise        | 23.109    | <0.001            | -0.753 $\pm$ 0.196      | <0.001          | ↓ 52.925  | -0.747         | <0.001               | 0.853 $\pm$ 0.181  | <0.001          | 0.870          | <0.001               | 0.616 $\pm$ 0.213 | 0.004           | 0.624          | 0.002                 | 0.214 $\pm$ 0.185 | 0.249           | 0.220          | 0.240                |
|                                                    | MidShape       | 6.091     | 0.107             | 0.117 $\pm$ 0.167       | 0.484           | ↑ 12.446  | 0.121          | 0.510                | 0.769 $\pm$ 0.168  | <0.001          | 0.784          | <0.001               | 0.347 $\pm$ 0.181 | 0.058           | 0.355          | 0.040                 | 0.208 $\pm$ 0.173 | 0.231           | 0.212          | 0.228                |
|                                                    | MidDuty        | 6.551     | 0.088             | 0.167 $\pm$ 0.169       | 0.326           | ↑ 18.133  | 0.166          | 0.352                | 0.771 $\pm$ 0.168  | <0.001          | 0.780          | <0.001               | 0.322 $\pm$ 0.183 | 0.079           | 0.328          | 0.050                 | 0.187 $\pm$ 0.175 | 0.286           | 0.192          | 0.296                |
|                                                    | MidRate        | 21.352    | <0.001            | 0.720 $\pm$ 0.201       | <0.001          | ↑ 105.363 | 0.719          | <0.001               | 0.847 $\pm$ 0.180  | <0.001          | 0.859          | <0.001               | 0.429 $\pm$ 0.194 | 0.028           | 0.434          | 0.014                 | 0.088 $\pm$ 0.188 | 0.641           | 0.095          | 0.638                |
|                                                    | IniPeak        | 5.663     | 0.129             | -0.098 $\pm$ 0.296      | 0.740           | ↓ 9.370   | -0.104         | 0.724                | 0.767 $\pm$ 0.167  | <0.001          | 0.781          | <0.001               | 0.266 $\pm$ 0.309 | 0.390           | 0.266          | 0.390                 | 0.232 $\pm$ 0.173 | 0.181           | 0.235          | 0.180                |
|                                                    | IniFreq        | 6.914     | 0.075             | 0.212 $\pm$ 0.186       | 0.257           | ↑ 23.642  | 0.214          | 0.234                | 0.774 $\pm$ 0.168  | <0.001          | 0.786          | <0.001               | 0.405 $\pm$ 0.191 | 0.035           | 0.409          | 0.014                 | 0.148 $\pm$ 0.183 | 0.419           | 0.151          | 0.410                |
|                                                    | MidPeak        | 5.553     | 0.135             | -0.005 $\pm$ 0.292      | 0.986           | ↓ 0.524   | -0.011         | 0.968                | 0.767 $\pm$ 0.167  | <0.001          | 0.780          | <0.001               | 0.345 $\pm$ 0.305 | 0.260           | 0.344          | 0.276                 | 0.224 $\pm$ 0.172 | 0.196           | 0.225          | 0.204                |
| MidFreq                                            | 6.260          | 0.100     | 0.156 $\pm$ 0.189 | 0.411                   | ↑ 16.825        | 0.160     | 0.394          | 0.771 $\pm$ 0.168    | <0.001             | 0.783           | <0.001         | 0.394 $\pm$ 0.192    | 0.041             | 0.402           | 0.014          | 0.167 $\pm$ 0.184     | 0.366             | 0.170           | 0.364          |                      |
| TCS4                                               | IniDur         | 57.830    | <0.001            | -1.185 $\pm$ 0.241      | <0.001          | ↓ 69.438  | -1.177         | <0.001               | -0.003 $\pm$ 0.181 | 0.987           | 0.003          | 0.966                | 1.027 $\pm$ 0.244 | <0.001          | 1.033          | <0.001                | 0.808 $\pm$ 0.223 | <0.001          | 0.817          | <0.001               |
|                                                    | IniInt         | 54.658    | <0.001            | -1.085 $\pm$ 0.230      | <0.001          | ↓ 66.203  | -1.074         | <0.001               | -0.057 $\pm$ 0.180 | 0.753           | -0.051         | 0.784                | 0.729 $\pm$ 0.210 | 0.001           | 0.740          | <0.001                | 0.641 $\pm$ 0.211 | 0.003           | 0.653          | <0.001               |
|                                                    | MidDur         | 57.138    | <0.001            | -1.175 $\pm$ 0.240      | <0.001          | ↓ 69.124  | -1.171         | <0.001               | 0.016 $\pm$ 0.181  | 0.930           | 0.018          | 0.924                | 1.041 $\pm$ 0.247 | <0.001          | 1.046          | <0.001                | 0.814 $\pm$ 0.220 | <0.001          | 0.824          | <0.001               |
|                                                    | MidRise        | 54.632    | <0.001            | -1.127 $\pm$ 0.241      | <0.001          | ↓ 67.590  | -1.120         | <0.001               | -0.017 $\pm$ 0.179 | 0.923           | -0.010         | 0.942                | 0.998 $\pm$ 0.242 | <0.001          | 1.008          | <0.001                | 0.837 $\pm$ 0.219 | <0.001          | 0.847          | <0.001               |
|                                                    | MidShape       | 25.816    | <0.001            | 0.227 $\pm$ 0.167       | 0.175           | ↑ 25.478  | 0.231          | 0.156                | -0.025 $\pm$ 0.164 | 0.878           | -0.017         | 0.884                | 0.498 $\pm$ 0.180 | 0.006           | 0.506          | 0.004                 | 0.701 $\pm$ 0.193 | <0.001          | 0.708          | <0.001               |
|                                                    | MidDuty        | 24.716    | <0.001            | 0.154 $\pm$ 0.171       | 0.367           | ↑ 16.697  | 0.149          | 0.394                | -0.028 $\pm$ 0.164 | 0.866           | -0.018         | 0.882                | 0.476 $\pm$ 0.180 | 0.009           | 0.485          | 0.004                 | 0.690 $\pm$ 0.194 | <0.001          | 0.697          | <0.001               |
|                                                    | MidRate        | 49.213    | <0.001            | 0.967 $\pm$ 0.222       | <0.001          | ↑ 162.917 | 0.958          | <0.001               | -0.031 $\pm$ 0.176 | 0.859           | -0.025         | 0.888                | 0.693 $\pm$ 0.204 | 0.001           | 0.700          | <0.001                | 0.683 $\pm$ 0.209 | 0.001           | 0.691          | <0.001               |
|                                                    | IniPeak        | 25.002    | <0.001            | -0.311 $\pm$ 0.299      | 0.300           | ↓ 26.730  | -0.310         | 0.332                | -0.026 $\pm$ 0.164 | 0.872           | -0.017         | 0.886                | 0.237 $\pm$ 0.307 | 0.441           | 0.245          | 0.430                 | 0.745 $\pm$ 0.193 | <0.001          | 0.752          | <0.001               |
|                                                    | IniFreq        | 30.224    | <0.001            | 0.461 $\pm$ 0.192       | 0.018           | ↑ 58.537  | 0.462          | 0.012                | -0.027 $\pm$ 0.166 | 0.874           | -0.022         | 0.868                | 0.645 $\pm$ 0.200 | 0.002           | 0.659          | <0.001                | 0.596 $\pm$ 0.201 | 0.004           | 0.603          | 0.004                |
|                                                    | MidPeak        | 24.352    | <0.001            | -0.200 $\pm$ 0.291      | 0.494           | ↓ 18.102  | -0.197         | 0.530                | -0.027 $\pm$ 0.163 | 0.871           | -0.018         | 0.884                | 0.331 $\pm$ 0.303 | 0.275           | 0.341          | 0.260                 | 0.734 $\pm$ 0.192 | <0.001          | 0.741          | <0.001               |
| MidFreq                                            | 26.054         | <0.001    | 0.269 $\pm$ 0.188 | 0.155                   | ↑ 30.881        | 0.271     | 0.146          | -0.024 $\pm$ 0.164   | 0.882              | -0.017          | 0.926          | 0.583 $\pm$ 0.193    | 0.003             | 0.594           | <0.001         | 0.633 $\pm$ 0.201     | 0.002             | 0.637           | 0.002          |                      |

\*BTSP are *P*-values estimated from bootstraps using a statistic derived from 1000 simulated data sets. See Ives and Garland (2010) Syst Biol 59:9-26.

Table S4 (Cont.) Standard and phylogenetic logistic regression analyses between discrete binary variables (TCS3, TCS4, ..., TCS8 for coloration conspicuousness and ability to sequester alkaloids) and continuous variables of call, body size (snout vent length, SVL), and external temperature.

| Standard Logistic Regression with Firth Correction |                |           |                 |                         |                 |           |                |                      |                    |                 |                |                      |                   |                 |                |                       |                   |                 |                |                      |
|----------------------------------------------------|----------------|-----------|-----------------|-------------------------|-----------------|-----------|----------------|----------------------|--------------------|-----------------|----------------|----------------------|-------------------|-----------------|----------------|-----------------------|-------------------|-----------------|----------------|----------------------|
| Binary Variables                                   | Call Variables | Model Fit |                 | Call Variable ( $b_1$ ) |                 |           |                | Intercept ( $b_0$ )  |                    |                 |                | SVL ( $b_2$ )        |                   |                 |                | Temperature ( $b_3$ ) |                   |                 |                |                      |
|                                                    |                | $\chi^2$  | <i>P</i> -value | Value $\pm$ SE          | <i>P</i> -value | Odds %    | BTSP $\bar{X}$ | BTSP <i>P</i> -value | Value $\pm$ SE     | <i>P</i> -value | BTSP $\bar{X}$ | BTSP <i>P</i> -value | Value $\pm$ SE    | <i>P</i> -value | BTSP $\bar{X}$ | BTSP <i>P</i> -value  | Value $\pm$ SE    | <i>P</i> -value | BTSP $\bar{X}$ | BTSP <i>P</i> -value |
| TCS5                                               | IniDur         | 59.428    | <0.001          | -1.230 $\pm$ 0.249      | <0.001          | ↓ 70.777  | -1.233         | <0.001               | -0.292 $\pm$ 0.184 | 0.114           | -0.290         | 0.116                | 1.209 $\pm$ 0.256 | <0.001          | 1.213          | <0.001                | 0.693 $\pm$ 0.222 | 0.002           | 0.705          | <0.001               |
|                                                    | IniInt         | 57.697    | <0.001          | -1.178 $\pm$ 0.246      | <0.001          | ↓ 69.208  | -1.176         | <0.001               | -0.356 $\pm$ 0.186 | 0.057           | -0.352         | 0.066                | 0.931 $\pm$ 0.222 | <0.001          | 0.942          | <0.001                | 0.523 $\pm$ 0.210 | 0.014           | 0.538          | 0.004                |
|                                                    | MidDur         | 59.601    | <0.001          | -1.237 $\pm$ 0.249      | <0.001          | ↓ 70.963  | -1.239         | <0.001               | -0.272 $\pm$ 0.183 | 0.141           | -0.270         | 0.148                | 1.234 $\pm$ 0.261 | <0.001          | 1.241          | <0.001                | 0.701 $\pm$ 0.220 | 0.002           | 0.715          | 0.002                |
|                                                    | MidRise        | 55.879    | <0.001          | -1.179 $\pm$ 0.252      | <0.001          | ↓ 69.235  | -1.175         | <0.001               | -0.303 $\pm$ 0.182 | 0.099           | -0.297         | 0.130                | 1.176 $\pm$ 0.252 | <0.001          | 1.181          | <0.001                | 0.721 $\pm$ 0.217 | 0.001           | 0.732          | <0.001               |
|                                                    | MidShape       | 29.148    | <0.001          | 0.354 $\pm$ 0.171       | 0.040           | ↑ 42.417  | 0.358          | 0.044                | -0.263 $\pm$ 0.167 | 0.117           | -0.254         | 0.120                | 0.640 $\pm$ 0.186 | 0.001           | 0.646          | <0.001                | 0.594 $\pm$ 0.194 | 0.003           | 0.601          | <0.001               |
|                                                    | MidDuty        | 25.530    | <0.001          | 0.166 $\pm$ 0.173       | 0.340           | ↑ 18.007  | 0.161          | 0.360                | -0.262 $\pm$ 0.165 | 0.115           | -0.251         | 0.142                | 0.610 $\pm$ 0.184 | 0.001           | 0.615          | <0.001                | 0.589 $\pm$ 0.193 | 0.003           | 0.600          | <0.001               |
|                                                    | MidRate        | 52.289    | <0.001          | 1.044 $\pm$ 0.233       | <0.001          | ↑ 183.942 | 1.043          | <0.001               | -0.314 $\pm$ 0.180 | 0.084           | -0.310         | 0.096                | 0.880 $\pm$ 0.215 | <0.001          | 0.886          | <0.001                | 0.570 $\pm$ 0.209 | 0.007           | 0.581          | <0.001               |
|                                                    | IniPeak        | 26.108    | <0.001          | -0.368 $\pm$ 0.304      | 0.227           | ↓ 30.799  | -0.377         | 0.226                | -0.264 $\pm$ 0.166 | 0.113           | -0.256         | 0.134                | 0.328 $\pm$ 0.309 | 0.291           | 0.330          | 0.314                 | 0.649 $\pm$ 0.191 | 0.001           | 0.658          | <0.001               |
|                                                    | IniFreq        | 38.291    | <0.001          | 0.717 $\pm$ 0.211       | 0.001           | ↑ 104.754 | 0.715          | <0.001               | -0.275 $\pm$ 0.172 | 0.111           | -0.268         | 0.112                | 0.892 $\pm$ 0.219 | <0.001          | 0.905          | <0.001                | 0.443 $\pm$ 0.206 | 0.032           | 0.453          | 0.014                |
|                                                    | MidPeak        | 25.421    | <0.001          | -0.268 $\pm$ 0.296      | 0.365           | ↓ 23.542  | -0.275         | 0.370                | -0.262 $\pm$ 0.165 | 0.114           | -0.253         | 0.114                | 0.411 $\pm$ 0.304 | 0.179           | 0.415          | 0.198                 | 0.638 $\pm$ 0.190 | 0.001           | 0.646          | <0.001               |
|                                                    | MidFreq        | 33.272    | <0.001          | 0.566 $\pm$ 0.204       | 0.006           | ↑ 76.054  | 0.567          | 0.004                | -0.264 $\pm$ 0.169 | 0.120           | -0.261         | 0.106                | 0.833 $\pm$ 0.210 | <0.001          | 0.846          | <0.001                | 0.449 $\pm$ 0.204 | 0.029           | 0.458          | 0.018                |
| TCS6                                               | IniDur         | 64.754    | <0.001          | -1.594 $\pm$ 0.294      | <0.001          | ↓ 79.681  | -1.600         | <0.001               | -0.959 $\pm$ 0.212 | <0.001          | -0.960         | <0.001               | 1.160 $\pm$ 0.261 | <0.001          | 1.178          | <0.001                | 0.526 $\pm$ 0.229 | 0.023           | 0.540          | 0.014                |
|                                                    | IniInt         | 75.155    | <0.001          | -1.948 $\pm$ 0.358      | <0.001          | ↓ 85.746  | -1.950         | <0.001               | -1.171 $\pm$ 0.243 | <0.001          | -1.171         | <0.001               | 1.053 $\pm$ 0.256 | <0.001          | 1.061          | <0.001                | 0.396 $\pm$ 0.229 | 0.085           | 0.406          | 0.074                |
|                                                    | MidDur         | 61.764    | <0.001          | -1.495 $\pm$ 0.278      | <0.001          | ↓ 77.573  | -1.504         | <0.001               | -0.912 $\pm$ 0.206 | <0.001          | -0.914         | <0.001               | 1.119 $\pm$ 0.255 | <0.001          | 1.139          | <0.001                | 0.519 $\pm$ 0.223 | 0.021           | 0.534          | 0.010                |
|                                                    | MidRise        | 55.255    | <0.001          | -1.437 $\pm$ 0.291      | <0.001          | ↓ 76.236  | -1.438         | <0.001               | -0.934 $\pm$ 0.207 | <0.001          | -0.934         | <0.001               | 1.063 $\pm$ 0.246 | <0.001          | 1.072          | <0.001                | 0.550 $\pm$ 0.214 | 0.011           | 0.567          | 0.010                |
|                                                    | MidShape       | 26.919    | <0.001          | 0.560 $\pm$ 0.182       | 0.002           | ↑ 75.020  | 0.566          | <0.001               | -0.760 $\pm$ 0.178 | <0.001          | -0.757         | <0.001               | 0.492 $\pm$ 0.176 | 0.006           | 0.494          | 0.006                 | 0.468 $\pm$ 0.197 | 0.019           | 0.473          | 0.024                |
|                                                    | MidDuty        | 25.217    | <0.001          | 0.544 $\pm$ 0.195       | 0.006           | ↑ 72.273  | 0.538          | 0.004                | -0.767 $\pm$ 0.178 | <0.001          | -0.768         | <0.001               | 0.429 $\pm$ 0.174 | 0.015           | 0.429          | 0.008                 | 0.429 $\pm$ 0.193 | 0.028           | 0.438          | 0.014                |
|                                                    | MidRate        | 69.457    | <0.001          | 1.739 $\pm$ 0.327       | <0.001          | ↑ 469.279 | 1.733          | <0.001               | -1.036 $\pm$ 0.221 | <0.001          | -1.035         | <0.001               | 0.968 $\pm$ 0.241 | <0.001          | 0.976          | <0.001                | 0.477 $\pm$ 0.228 | 0.038           | 0.487          | 0.018                |
|                                                    | IniPeak        | 17.460    | 0.001           | -0.320 $\pm$ 0.316      | 0.313           | ↓ 27.410  | -0.327         | 0.298                | -0.722 $\pm$ 0.171 | <0.001          | -0.721         | <0.001               | 0.219 $\pm$ 0.307 | 0.477           | 0.216          | 0.494                 | 0.537 $\pm$ 0.187 | 0.005           | 0.544          | 0.002                |
|                                                    | IniFreq        | 54.831    | <0.001          | 1.399 $\pm$ 0.275       | <0.001          | ↑ 305.196 | 1.411          | <0.001               | -0.925 $\pm$ 0.205 | <0.001          | -0.921         | <0.001               | 0.985 $\pm$ 0.242 | <0.001          | 1.005          | <0.001                | 0.191 $\pm$ 0.222 | 0.392           | 0.192          | 0.398                |
|                                                    | MidPeak        | 16.751    | 0.001           | -0.183 $\pm$ 0.308      | 0.552           | ↓ 16.748  | -0.191         | 0.566                | -0.718 $\pm$ 0.171 | <0.001          | -0.715         | <0.001               | 0.331 $\pm$ 0.302 | 0.274           | 0.329          | 0.286                 | 0.526 $\pm$ 0.186 | 0.005           | 0.531          | 0.002                |
|                                                    | MidFreq        | 37.081    | <0.001          | 0.961 $\pm$ 0.239       | <0.001          | ↑ 161.363 | 0.967          | <0.001               | -0.815 $\pm$ 0.187 | <0.001          | -0.810         | <0.001               | 0.806 $\pm$ 0.210 | <0.001          | 0.821          | <0.001                | 0.219 $\pm$ 0.212 | 0.304           | 0.223          | 0.288                |

\*BTSP are *P*-values estimated from bootstraps using a statistic derived from 1000 simulated data sets. See Ives and Garland (2010) Syst Biol 59:9-26.

Table S4 (Cont.) Standard and phylogenetic logistic regression analyses between discrete binary variables (TCS3, TCS4, ..., TCS8 for coloration conspicuousness and ability to sequester alkaloids) and continuous variables of call, body size (snout vent length, SVL), and external temperature.

| Standard Logistic Regression with Firth Correction |                |           |                    |                         |                 |           |                |                      |                    |                 |                |                      |                    |                 |                |                       |                    |                 |                |                      |
|----------------------------------------------------|----------------|-----------|--------------------|-------------------------|-----------------|-----------|----------------|----------------------|--------------------|-----------------|----------------|----------------------|--------------------|-----------------|----------------|-----------------------|--------------------|-----------------|----------------|----------------------|
| Binary Variables                                   | Call Variables | Model Fit |                    | Call Variable ( $b_1$ ) |                 |           |                | Intercept ( $b_0$ )  |                    |                 |                | SVL ( $b_2$ )        |                    |                 |                | Temperature ( $b_3$ ) |                    |                 |                |                      |
|                                                    |                | $\chi^2$  | <i>P</i> -value    | Value $\pm$ SE          | <i>P</i> -value | Odds %    | BTSP $\bar{X}$ | BTSP <i>P</i> -value | Value $\pm$ SE     | <i>P</i> -value | BTSP $\bar{X}$ | BTSP <i>P</i> -value | Value $\pm$ SE     | <i>P</i> -value | BTSP $\bar{X}$ | BTSP <i>P</i> -value  | Value $\pm$ SE     | <i>P</i> -value | BTSP $\bar{X}$ | BTSP <i>P</i> -value |
| TCS7                                               | IniDur         | 14.155    | <b>0.003</b>       | -0.916 $\pm$ 0.295      | <b>0.002</b>    | ↓ 59.978  | -0.903         | <0.001               | -2.314 $\pm$ 0.306 | <0.001          | -2.323         | <0.001               | -0.168 $\pm$ 0.261 | 0.522           | -0.175         | 0.538                 | -0.113 $\pm$ 0.244 | 0.643           | -0.109         | 0.618                |
|                                                    | IniInt         | 12.933    | <b>0.005</b>       | -0.800 $\pm$ 0.271      | <b>0.004</b>    | ↓ 55.072  | -0.782         | 0.004                | -2.253 $\pm$ 0.289 | <0.001          | -2.254         | <0.001               | -0.266 $\pm$ 0.266 | 0.319           | -0.268         | 0.272                 | -0.132 $\pm$ 0.246 | 0.590           | -0.129         | 0.580                |
|                                                    | MidDur         | 15.273    | <b>0.002</b>       | -0.956 $\pm$ 0.293      | <b>0.001</b>    | ↓ 61.550  | -0.945         | 0.002                | -2.342 $\pm$ 0.311 | <0.001          | -2.350         | <0.001               | -0.162 $\pm$ 0.259 | 0.533           | -0.164         | 0.532                 | -0.116 $\pm$ 0.241 | 0.632           | -0.109         | 0.616                |
|                                                    | MidRise        | 19.206    | <b>&lt;0.001</b>   | -1.292 $\pm$ 0.384      | <b>0.001</b>    | ↓ 72.533  | -1.272         | <0.001               | -2.536 $\pm$ 0.370 | <0.001          | -2.535         | <0.001               | -0.107 $\pm$ 0.260 | 0.681           | -0.115         | 0.680                 | -0.113 $\pm$ 0.237 | 0.634           | -0.113         | 0.652                |
|                                                    | MidShape       | 2.973     | 0.396              | -0.061 $\pm$ 0.238      | 0.797           | ↓ 5.943   | -0.059         | 0.832                | -2.044 $\pm$ 0.248 | <0.001          | -2.057         | <0.001               | -0.410 $\pm$ 0.275 | 0.138           | -0.400         | 0.130                 | 0.040 $\pm$ 0.253  | 0.876           | 0.054          | 0.828                |
|                                                    | MidDuty        | 4.533     | 0.209              | 0.309 $\pm$ 0.249       | 0.216           | ↑ 36.242  | 0.308          | 0.202                | -2.078 $\pm$ 0.255 | <0.001          | -2.087         | <0.001               | -0.460 $\pm$ 0.279 | 0.101           | -0.451         | 0.084                 | -0.037 $\pm$ 0.254 | 0.885           | -0.024         | 0.930                |
|                                                    | MidRate        | 11.562    | <b>0.009</b>       | 0.709 $\pm$ 0.246       | <b>0.004</b>    | ↑ 103.147 | 0.694          | 0.008                | -2.218 $\pm$ 0.280 | <0.001          | -2.223         | <0.001               | -0.295 $\pm$ 0.261 | 0.259           | -0.296         | 0.220                 | -0.114 $\pm$ 0.241 | 0.637           | -0.107         | 0.638                |
|                                                    | IniPeak        | 5.963     | 0.113              | -0.733 $\pm$ 0.433      | 0.092           | ↓ 51.956  | -0.724         | 0.104                | -2.108 $\pm$ 0.261 | <0.001          | -2.117         | <0.001               | -1.030 $\pm$ 0.454 | 0.025           | -1.019         | 0.024                 | 0.079 $\pm$ 0.246  | 0.747           | 0.081          | 0.734                |
|                                                    | IniFreq        | 6.002     | 0.112              | 0.480 $\pm$ 0.282       | 0.091           | ↑ 61.532  | 0.463          | 0.106                | -2.107 $\pm$ 0.261 | <0.001          | -2.114         | <0.001               | -0.279 $\pm$ 0.275 | 0.312           | -0.278         | 0.292                 | -0.126 $\pm$ 0.273 | 0.645           | -0.116         | 0.674                |
|                                                    | MidPeak        | 5.086     | 0.166              | -0.601 $\pm$ 0.411      | 0.145           | ↓ 45.191  | -0.591         | 0.154                | -2.091 $\pm$ 0.258 | <0.001          | -2.098         | <0.001               | -0.920 $\pm$ 0.441 | 0.038           | -0.904         | 0.044                 | 0.064 $\pm$ 0.245  | 0.795           | 0.072          | 0.768                |
| MidFreq                                            | 3.516          | 0.319     | 0.215 $\pm$ 0.278  | 0.440                   | ↑ 23.991        | 0.214     | 0.420          | -2.053 $\pm$ 0.250   | <0.001             | -2.063          | <0.001         | -0.341 $\pm$ 0.283   | 0.230              | -0.331          | 0.226          | -0.041 $\pm$ 0.269    | 0.878              | -0.027          | 0.932          |                      |
| TCS8                                               | IniDur         | 9.042     | <b>0.029</b>       | -0.876 $\pm$ 0.354      | <b>0.014</b>    | ↓ 58.337  | -0.845         | 0.016                | -2.779 $\pm$ 0.376 | <0.001          | -2.784         | <0.001               | -0.155 $\pm$ 0.310 | 0.617           | -0.166         | 0.666                 | -0.054 $\pm$ 0.291 | 0.854           | -0.035         | 0.904                |
|                                                    | IniInt         | 8.207     | <b>0.042</b>       | -0.759 $\pm$ 0.324      | <b>0.020</b>    | ↓ 53.202  | -0.732         | 0.018                | -2.717 $\pm$ 0.353 | <0.001          | -2.717         | <0.001               | -0.249 $\pm$ 0.319 | 0.435           | -0.250         | 0.442                 | -0.072 $\pm$ 0.294 | 0.807           | -0.057         | 0.846                |
|                                                    | MidDur         | 10.209    | <b>0.017</b>       | -0.944 $\pm$ 0.352      | <b>0.008</b>    | ↓ 61.109  | -0.917         | 0.010                | -2.829 $\pm$ 0.388 | <0.001          | -2.836         | <0.001               | -0.144 $\pm$ 0.306 | 0.639           | -0.156         | 0.694                 | -0.062 $\pm$ 0.286 | 0.827           | -0.049         | 0.842                |
|                                                    | MidRise        | 12.132    | <b>0.007</b>       | -1.226 $\pm$ 0.462      | <b>0.009</b>    | ↓ 70.642  | -1.197         | <0.001               | -2.988 $\pm$ 0.454 | <0.001          | -2.978         | <0.001               | -0.100 $\pm$ 0.306 | 0.745           | -0.102         | 0.804                 | -0.056 $\pm$ 0.282 | 0.843           | -0.047         | 0.848                |
|                                                    | MidShape       | 2.785     | 0.426              | -0.226 $\pm$ 0.303      | 0.455           | ↓ 20.267  | -0.229         | 0.460                | -2.523 $\pm$ 0.307 | <0.001          | -2.532         | <0.001               | -0.399 $\pm$ 0.342 | 0.246           | -0.376         | 0.250                 | 0.108 $\pm$ 0.317  | 0.732           | 0.120          | 0.712                |
|                                                    | MidDuty        | 3.397     | 0.334              | 0.339 $\pm$ 0.305       | 0.267           | ↑ 40.422  | 0.330          | 0.266                | -2.548 $\pm$ 0.313 | <0.001          | -2.556         | <0.001               | -0.455 $\pm$ 0.341 | 0.184           | -0.445         | 0.170                 | 0.004 $\pm$ 0.313  | 0.989           | 0.017          | 0.922                |
|                                                    | MidRate        | 7.413     | 0.060              | 0.680 $\pm$ 0.293       | <b>0.021</b>    | ↑ 97.305  | 0.657          | 0.024                | -2.686 $\pm$ 0.343 | <0.001          | -2.691         | <0.001               | -0.277 $\pm$ 0.312 | 0.376           | -0.282         | 0.374                 | -0.058 $\pm$ 0.288 | 0.841           | -0.041         | 0.890                |
|                                                    | IniPeak        | 4.659     | 0.199              | -0.812 $\pm$ 0.517      | 0.118           | ↓ 55.591  | -0.803         | 0.128                | -2.590 $\pm$ 0.322 | <0.001          | -2.603         | <0.001               | -1.084 $\pm$ 0.539 | 0.046           | -1.076         | 0.052                 | 0.123 $\pm$ 0.300  | 0.682           | 0.137          | 0.650                |
|                                                    | IniFreq        | 2.524     | 0.471              | 0.226 $\pm$ 0.336       | 0.503           | ↑ 25.300  | 0.219          | 0.532                | -2.513 $\pm$ 0.303 | <0.001          | -2.521         | <0.001               | -0.330 $\pm$ 0.343 | 0.337           | -0.317         | 0.354                 | 0.005 $\pm$ 0.330  | 0.988           | 0.019          | 0.944                |
|                                                    | MidPeak        | 4.187     | 0.242              | -0.711 $\pm$ 0.487      | 0.146           | ↓ 50.903  | -0.705         | 0.156                | -2.576 $\pm$ 0.318 | <0.001          | -2.581         | <0.001               | -1.002 $\pm$ 0.522 | 0.057           | -0.991         | 0.080                 | 0.108 $\pm$ 0.299  | 0.720           | 0.125          | 0.682                |
| MidFreq                                            | 2.241          | 0.524     | -0.146 $\pm$ 0.330 | 0.658                   | ↓ 13.612        | -0.148    | 0.634          | -2.508 $\pm$ 0.303   | <0.001             | -2.514          | <0.001         | -0.443 $\pm$ 0.356   | 0.215              | -0.423          | 0.210          | 0.128 $\pm$ 0.326     | 0.696              | 0.146           | 0.616          |                      |

\*BTSP are *P*-values estimated from bootstraps using a statistic derived from 1000 simulated data sets. See Ives and Garland (2010) Syst Biol 59:9-26.

Table S4 (Cont.) Standard and phylogenetic logistic regression analyses between discrete binary variables (TCS3, TCS4, ..., TCS8 for coloration conspicuousness and ability to sequester alkaloids) and continuous variables of call, body size (snout vent length, SVL), and external temperature.

| Phylogenetic Logistic Regression with Firth Correction |                |                  |                    |                         |                  |           |                |                    |                     |            |                |                    |                    |                  |                |                    |                       |            |                |                 |
|--------------------------------------------------------|----------------|------------------|--------------------|-------------------------|------------------|-----------|----------------|--------------------|---------------------|------------|----------------|--------------------|--------------------|------------------|----------------|--------------------|-----------------------|------------|----------------|-----------------|
| Binary Variables                                       | Call Variables | Phyl. Signal     |                    | Call Variable ( $b_1$ ) |                  |           |                |                    | Intercept ( $b_0$ ) |            |                |                    | SVL ( $b_2$ )      |                  |                |                    | Temperature ( $b_3$ ) |            |                |                 |
|                                                        |                | $a$              | $P$ -value         | Value $\pm$ SE          | $P$ -value       | Odds %    | BTSP $\bar{X}$ | BTSP $P$ -value    | Value $\pm$ SE      | $P$ -value | BTSP $\bar{X}$ | BTSP $P$ -value    | Value $\pm$ SE     | $P$ -value       | BTSP $\bar{X}$ | BTSP $P$ -value    | Value $\pm$ SE        | $P$ -value | BTSP $\bar{X}$ | BTSP $P$ -value |
| Alkaloid                                               | IniDur         | 0.049            | <b>0.038</b>       | -1.184 $\pm$ 0.335      | <b>0.001</b>     | ↓ 69.389  | -1.351         | 0.012              | -0.627 $\pm$ 0.706  | 0.376      | -0.681         | 0.446              | 0.918 $\pm$ 0.271  | 0.001            | 1.028          | 0.016              | -0.137 $\pm$ 0.229    | 0.552      | -0.162         | 0.536           |
|                                                        | IniInt         | 0.944            | 0.052              | -1.229 $\pm$ 0.340      | <b>&lt;0.001</b> | ↓ 70.730  | -1.557         | 0.012              | -0.273 $\pm$ 0.852  | 0.749      | -0.287         | 0.724              | 0.665 $\pm$ 0.220  | 0.003            | 0.850          | 0.020              | -0.083 $\pm$ 0.198    | 0.676      | -0.079         | 0.640           |
|                                                        | MidDur         | 0.515            | 0.061              | -1.346 $\pm$ 0.354      | <b>&lt;0.001</b> | ↓ 73.962  | -1.555         | 0.006              | -0.832 $\pm$ 0.824  | 0.315      | -0.774         | 0.474              | 1.110 $\pm$ 0.293  | <b>&lt;0.001</b> | 1.288          | 0.004              | -0.128 $\pm$ 0.230    | 0.580      | -0.112         | 0.608           |
|                                                        | MidRise        | 0.496            | <b>0.048</b>       | -1.187 $\pm$ 0.316      | <b>&lt;0.001</b> | ↓ 69.474  | -1.414         | 0.010              | -0.007 $\pm$ 0.787  | 0.993      | -0.098         | 0.944              | 0.948 $\pm$ 0.278  | 0.001            | 1.114          | 0.014              | -0.093 $\pm$ 0.201    | 0.646      | -0.061         | 0.708           |
|                                                        | MidShape       | 0.892            | <b>0.037</b>       | 0.006 $\pm$ 0.141       | 0.967            | ↑ 0.580   | 0.065          | 0.971              | -0.492 $\pm$ 1.074  | 0.648      | -0.907         | 0.748              | 0.334 $\pm$ 0.169  | 0.052            | 0.533          | 0.068              | -0.023 $\pm$ 0.133    | 0.863      | -0.032         | 0.796           |
|                                                        | MidDuty        | 1.056            | <b>0.030</b>       | 0.064 $\pm$ 0.150       | 0.672            | ↑ 6.559   | 0.048          | 0.726              | -0.343 $\pm$ 1.177  | 0.771      | -0.569         | 0.829              | 0.237 $\pm$ 0.155  | 0.129            | 0.314          | 0.121              | -0.057 $\pm$ 0.123    | 0.642      | -0.046         | 0.611           |
|                                                        | MidRate        | 0.907            | 0.053              | 1.447 $\pm$ 0.382       | <b>&lt;0.001</b> | ↑ 324.907 | 1.756          | 0.012              | -0.105 $\pm$ 0.849  | 0.902      | -0.176         | 0.762              | 0.649 $\pm$ 0.222  | 0.004            | 0.808          | 0.026              | -0.158 $\pm$ 0.217    | 0.468      | -0.187         | 0.458           |
|                                                        | IniPeak        | 0.784            | <b>0.029</b>       | -0.262 $\pm$ 0.288      | 0.366            | ↓ 23.022  | -0.373         | 0.383              | -0.712 $\pm$ 1.052  | 0.500      | -1.705         | 0.622              | 0.151 $\pm$ 0.269  | 0.575            | 0.181          | 0.568              | 0.024 $\pm$ 0.136     | 0.862      | 0.018          | 0.921           |
|                                                        | IniFreq        | 1.029            | <b>0.021</b>       | 0.345 $\pm$ 0.190       | 0.073            | ↑ 41.137  | 0.536          | 0.092              | -0.459 $\pm$ 1.044  | 0.661      | -0.506         | 0.768              | 0.304 $\pm$ 0.163  | 0.065            | 0.437          | 0.078              | -0.078 $\pm$ 0.127    | 0.541      | -0.097         | 0.495           |
|                                                        | MidPeak        | 0.845            | <b>0.030</b>       | -0.270 $\pm$ 0.267      | 0.314            | ↓ 23.699  | -0.323         | 0.344              | -0.708 $\pm$ 1.054  | 0.503      | -0.957         | 0.622              | 0.153 $\pm$ 0.251  | 0.545            | 0.200          | 0.590              | 0.031 $\pm$ 0.132     | 0.817      | 0.010          | 0.837           |
| MidFreq                                                | 1.091          | <b>0.038</b>     | -0.051 $\pm$ 0.191 | 0.791                   | ↓ 4.952          | -0.033    | 0.808          | -0.201 $\pm$ 1.182 | 0.865               | -0.163     | 0.931          | 0.247 $\pm$ 0.153  | 0.109              | 0.335            | 0.129          | -0.034 $\pm$ 0.112 | 0.760                 | -0.053     | 0.687          |                 |
| TCS3                                                   | IniDur         | -0.120           | <b>0.008</b>       | -0.452 $\pm$ 0.198      | <b>0.024</b>     | ↓ 36.359  | -0.470         | 0.030              | 0.620 $\pm$ 0.694   | 0.373      | 0.507          | 0.480              | 0.076 $\pm$ 0.174  | 0.664            | 0.079          | 0.692              | -0.021 $\pm$ 0.136    | 0.878      | -0.011         | 0.902           |
|                                                        | IniInt         | -0.204           | <b>0.009</b>       | -0.365 $\pm$ 0.193      | 0.060            | ↓ 30.587  | -0.375         | 0.050              | 0.704 $\pm$ 0.688   | 0.308      | 0.521          | 0.398              | -0.030 $\pm$ 0.165 | 0.856            | -0.042         | 0.842              | -0.092 $\pm$ 0.137    | 0.504      | -0.095         | 0.566           |
|                                                        | MidDur         | -0.228           | <b>0.004</b>       | -0.455 $\pm$ 0.201      | <b>0.025</b>     | ↓ 36.529  | -0.474         | 0.034              | 0.705 $\pm$ 0.651   | 0.280      | 0.535          | 0.380              | 0.104 $\pm$ 0.181  | 0.568            | 0.107          | 0.610              | -0.028 $\pm$ 0.130    | 0.831      | -0.034         | 0.884           |
|                                                        | MidRise        | -0.093           | <b>0.002</b>       | -0.370 $\pm$ 0.168      | <b>0.029</b>     | ↓ 30.901  | -0.379         | 0.016              | 0.517 $\pm$ 0.708   | 0.467      | 0.397          | 0.574              | 0.072 $\pm$ 0.165  | 0.664            | 0.072          | 0.676              | 0.002 $\pm$ 0.124     | 0.985      | 0.016          | 0.946           |
|                                                        | MidShape       | -0.080           | <b>0.001</b>       | -0.035 $\pm$ 0.096      | 0.718            | ↓ 3.422   | -0.086         | 0.676              | 0.248 $\pm$ 0.817   | 0.762      | 0.211          | 0.820              | -0.038 $\pm$ 0.123 | 0.756            | -0.062         | 0.742              | -0.039 $\pm$ 0.093    | 0.678      | -0.064         | 0.730           |
|                                                        | MidDuty        | 0.076            | <b>0.002</b>       | 0.140 $\pm$ 0.123       | 0.255            | ↑ 15.063  | 0.146          | 0.298              | 0.225 $\pm$ 0.857   | 0.793      | 0.127          | 0.850              | -0.088 $\pm$ 0.133 | 0.506            | -0.103         | 0.490              | -0.052 $\pm$ 0.100    | 0.603      | -0.055         | 0.650           |
|                                                        | MidRate        | -0.415           | <b>0.006</b>       | 0.543 $\pm$ 0.215       | <b>0.013</b>     | ↑ 72.125  | 0.566          | 0.010              | 0.687 $\pm$ 0.557   | 0.219      | 0.597          | 0.300              | 0.004 $\pm$ 0.179  | 0.983            | 0.008          | 0.960              | -0.082 $\pm$ 0.148    | 0.578      | -0.084         | 0.624           |
|                                                        | IniPeak        | -0.075           | <b>&lt;0.001</b>   | 0.003 $\pm$ 0.181       | 0.985            | ↑ 0.337   | 0.006          | 0.952              | 0.274 $\pm$ 0.829   | 0.742      | 0.217          | 0.798              | -0.038 $\pm$ 0.177 | 0.829            | -0.045         | 0.788              | -0.041 $\pm$ 0.093    | 0.659      | -0.026         | 0.698           |
|                                                        | IniFreq        | -0.030           | <b>&lt;0.001</b>   | -0.063 $\pm$ 0.118      | 0.595            | ↓ 6.075   | -0.078         | 0.618              | 0.277 $\pm$ 0.843   | 0.743      | 0.200          | 0.782              | -0.046 $\pm$ 0.126 | 0.716            | -0.040         | 0.716              | -0.033 $\pm$ 0.091    | 0.716      | -0.067         | 0.752           |
|                                                        | MidPeak        | -0.068           | <b>&lt;0.001</b>   | 0.052 $\pm$ 0.183       | 0.778            | ↑ 5.319   | 0.043          | 0.790              | 0.317 $\pm$ 0.828   | 0.702      | 0.319          | 0.746              | -0.009 $\pm$ 0.175 | 0.959            | -0.002         | 0.914              | -0.050 $\pm$ 0.097    | 0.609      | -0.042         | 0.644           |
| MidFreq                                                | -0.082         | <b>&lt;0.001</b> | -0.025 $\pm$ 0.125 | 0.842                   | ↓ 2.467          | -0.020    | 0.872          | 0.269 $\pm$ 0.823  | 0.744               | 0.177      | 0.792          | -0.043 $\pm$ 0.122 | 0.728              | -0.057           | 0.680          | -0.033 $\pm$ 0.091 | 0.720                 | -0.011     | 0.760          |                 |
| TCS4                                                   | IniDur         | 0.609            | <b>0.029</b>       | -0.550 $\pm$ 0.196      | <b>0.006</b>     | ↓ 42.328  | -0.684         | 0.012              | -0.678 $\pm$ 0.789  | 0.391      | -0.624         | 0.536              | 0.530 $\pm$ 0.180  | 0.004            | 0.672          | 0.010              | 0.284 $\pm$ 0.142     | 0.047      | 0.371          | 0.066           |
|                                                        | IniInt         | 0.674            | <b>0.029</b>       | -0.623 $\pm$ 0.181      | <b>0.001</b>     | ↓ 46.350  | -0.787         | 0.014              | -0.296 $\pm$ 0.741  | 0.690      | -0.446         | 0.722              | 0.374 $\pm$ 0.152  | 0.015            | 0.445          | 0.030              | 0.192 $\pm$ 0.131     | 0.144      | 0.249          | 0.162           |
|                                                        | MidDur         | 0.618            | <b>0.018</b>       | -0.570 $\pm$ 0.185      | <b>0.002</b>     | ↓ 43.455  | -0.786         | 0.008              | -0.410 $\pm$ 0.750  | 0.585      | -0.555         | 0.718              | 0.566 $\pm$ 0.174  | 0.001            | 0.701          | 0.006              | 0.272 $\pm$ 0.135     | 0.045      | 0.287          | 0.062           |
|                                                        | MidRise        | 0.702            | <b>0.022</b>       | -0.485 $\pm$ 0.162      | <b>0.003</b>     | ↓ 38.406  | -0.594         | 0.032              | -0.419 $\pm$ 0.785  | 0.595      | -0.413         | 0.698              | 0.514 $\pm$ 0.168  | 0.003            | 0.661          | 0.020              | 0.261 $\pm$ 0.131     | 0.048      | 0.341          | 0.060           |
|                                                        | MidShape       | 0.571            | <b>0.004</b>       | -0.092 $\pm$ 0.087      | 0.290            | ↓ 8.833   | -0.110         | 0.372              | 0.043 $\pm$ 0.956   | 0.964      | -0.243         | 0.970              | 0.201 $\pm$ 0.130  | 0.123            | 0.161          | 0.168              | 0.147 $\pm$ 0.102     | 0.152      | 0.164          | 0.214           |
|                                                        | MidDuty        | 0.628            | <b>0.014</b>       | 0.155 $\pm$ 0.126       | 0.220            | ↑ 16.815  | 0.127          | 0.242              | -0.470 $\pm$ 0.912  | 0.607      | -0.715         | 0.692              | 0.256 $\pm$ 0.150  | 0.091            | 0.353          | 0.106              | 0.169 $\pm$ 0.109     | 0.124      | 0.202          | 0.188           |
|                                                        | MidRate        | 0.562            | <b>0.020</b>       | 0.547 $\pm$ 0.186       | <b>0.004</b>     | ↑ 72.803  | 0.697          | 0.010              | -0.521 $\pm$ 0.775  | 0.502      | -0.523         | 0.628              | 0.315 $\pm$ 0.151  | 0.038            | 0.385          | 0.050              | 0.217 $\pm$ 0.134     | 0.108      | 0.273          | 0.136           |
|                                                        | IniPeak        | 0.304            | <b>0.003</b>       | 0.041 $\pm$ 0.202       | 0.839            | ↑ 4.186   | 0.034          | 0.842              | -0.241 $\pm$ 0.889  | 0.787      | -0.262         | 0.850              | 0.247 $\pm$ 0.206  | 0.232            | 0.312          | 0.250              | 0.134 $\pm$ 0.108     | 0.217      | 0.173          | 0.240           |
|                                                        | IniFreq        | 0.539            | <b>0.007</b>       | -0.054 $\pm$ 0.112      | 0.631            | ↓ 5.249   | -0.088         | 0.691              | -0.102 $\pm$ 1.071  | 0.924      | -0.304         | 0.953              | 0.103 $\pm$ 0.115  | 0.375            | 0.188          | 0.416              | 0.086 $\pm$ 0.093     | 0.357      | 0.136          | 0.406           |
|                                                        | MidPeak        | 0.317            | <b>0.003</b>       | 0.048 $\pm$ 0.195       | 0.805            | ↑ 4.954   | 0.049          | 0.800              | -0.288 $\pm$ 0.895  | 0.748      | -0.472         | 0.788              | 0.242 $\pm$ 0.194  | 0.214            | 0.310          | 0.228              | 0.145 $\pm$ 0.110     | 0.189      | 0.105          | 0.208           |
| MidFreq                                                | 0.733          | <b>0.011</b>     | -0.103 $\pm$ 0.126 | 0.415                   | ↓ 9.819          | -0.183    | 0.504          | -0.092 $\pm$ 1.079 | 0.932               | -0.422     | 0.952          | 0.131 $\pm$ 0.117  | 0.263              | 0.172            | 0.368          | 0.100 $\pm$ 0.096  | 0.295                 | 0.129      | 0.338          |                 |

\*BTSP are  $P$ -values estimated from bootstraps using a statistic derived from 1000 simulated data sets. See Ives and Garland (2010) Syst Biol 59:9-26.



Table S4 (Cont.) Standard and phylogenetic logistic regression analyses between discrete binary variables (TCS3, TCS4, ..., TCS8 for coloration conspicuousness and ability to sequester alkaloids) and continuous variables of call, body size (snout vent length, SVL), and external temperature.

| Phylogenetic Logistic Regression with Firth Correction |                |              |              |                         |              |           |                |                     |                    |            |                |                 |                   |            |                |                       |                    |            |                |                 |
|--------------------------------------------------------|----------------|--------------|--------------|-------------------------|--------------|-----------|----------------|---------------------|--------------------|------------|----------------|-----------------|-------------------|------------|----------------|-----------------------|--------------------|------------|----------------|-----------------|
| Binary Variables                                       | Call Variables | Phyl. Signal |              | Call Variable ( $b_1$ ) |              |           |                | Intercept ( $b_0$ ) |                    |            |                | SVL ( $b_2$ )   |                   |            |                | Temperature ( $b_3$ ) |                    |            |                |                 |
|                                                        |                | $a$          | $P$ -value   | Value $\pm$ SE          | $P$ -value   | Odds %    | BTSP $\bar{X}$ | BTSP $P$ -value     | Value $\pm$ SE     | $P$ -value | BTSP $\bar{X}$ | BTSP $P$ -value | Value $\pm$ SE    | $P$ -value | BTSP $\bar{X}$ | BTSP $P$ -value       | Value $\pm$ SE     | $P$ -value | BTSP $\bar{X}$ | BTSP $P$ -value |
| TCS5                                                   | IniDur         | 0.261        | <b>0.035</b> | -0.574 $\pm$ 0.231      | <b>0.014</b> | ↓ 43.663  | -0.618         | 0.044               | -1.216 $\pm$ 0.810 | 0.135      | -1.152         | 0.274           | 0.757 $\pm$ 0.241 | 0.002      | 0.822          | 0.016                 | -0.033 $\pm$ 0.162 | 0.836      | -0.042         | 0.800           |
|                                                        | IniInt         | 0.303        | <b>0.030</b> | -0.595 $\pm$ 0.224      | <b>0.009</b> | ↓ 44.822  | -0.670         | 0.024               | -1.024 $\pm$ 0.797 | 0.201      | -1.255         | 0.356           | 0.582 $\pm$ 0.203 | 0.005      | 0.507          | 0.020                 | -0.095 $\pm$ 0.148 | 0.523      | -0.067         | 0.606           |
|                                                        | MidDur         | 0.089        | <b>0.045</b> | -0.598 $\pm$ 0.248      | <b>0.017</b> | ↓ 45.035  | -0.676         | 0.036               | -1.418 $\pm$ 0.791 | 0.075      | -1.496         | 0.168           | 0.789 $\pm$ 0.254 | 0.002      | 0.799          | 0.018                 | -0.033 $\pm$ 0.171 | 0.848      | -0.011         | 0.844           |
|                                                        | MidRise        | 0.462        | <b>0.045</b> | -0.526 $\pm$ 0.208      | <b>0.012</b> | ↓ 40.898  | -0.662         | 0.036               | -1.168 $\pm$ 0.817 | 0.155      | -1.350         | 0.336           | 0.737 $\pm$ 0.234 | 0.002      | 0.804          | 0.022                 | -0.020 $\pm$ 0.149 | 0.893      | 0.024          | 0.908           |
|                                                        | MidShape       | 0.624        | <b>0.042</b> | -0.035 $\pm$ 0.126      | 0.782        | ↓ 3.438   | 0.021          | 0.842               | -0.892 $\pm$ 0.903 | 0.325      | -1.108         | 0.468           | 0.490 $\pm$ 0.189 | 0.010      | 0.636          | 0.022                 | 0.031 $\pm$ 0.123  | 0.799      | 0.005          | 0.846           |
|                                                        | MidDuty        | 0.654        | <b>0.040</b> | 0.147 $\pm$ 0.133       | 0.273        | ↑ 15.787  | 0.208          | 0.342               | -0.841 $\pm$ 0.906 | 0.355      | -1.103         | 0.478           | 0.421 $\pm$ 0.182 | 0.022      | 0.538          | 0.036                 | -0.014 $\pm$ 0.123 | 0.911      | -0.073         | 0.874           |
|                                                        | MidRate        | 0.226        | <b>0.031</b> | 0.545 $\pm$ 0.235       | <b>0.022</b> | ↑ 72.394  | 0.611          | 0.032               | -1.244 $\pm$ 0.832 | 0.137      | -1.221         | 0.262           | 0.519 $\pm$ 0.209 | 0.014      | 0.584          | 0.012                 | -0.108 $\pm$ 0.155 | 0.485      | -0.119         | 0.564           |
|                                                        | IniPeak        | 0.665        | <b>0.044</b> | -0.157 $\pm$ 0.233      | 0.503        | ↓ 14.497  | -0.246         | 0.496               | -0.783 $\pm$ 0.854 | 0.361      | -1.376         | 0.496           | 0.383 $\pm$ 0.248 | 0.124      | 0.487          | 0.178                 | 0.066 $\pm$ 0.118  | 0.578      | 0.099          | 0.612           |
|                                                        | IniFreq        | 0.425        | <b>0.026</b> | 0.030 $\pm$ 0.162       | 0.852        | ↑ 3.075   | 0.122          | 0.848               | -1.015 $\pm$ 0.874 | 0.247      | -1.589         | 0.404           | 0.531 $\pm$ 0.202 | 0.009      | 0.533          | 0.032                 | 0.059 $\pm$ 0.134  | 0.662      | 0.102          | 0.762           |
|                                                        | MidPeak        | 0.596        | <b>0.043</b> | -0.097 $\pm$ 0.233      | 0.679        | ↓ 9.214   | -0.113         | 0.660               | -0.923 $\pm$ 0.874 | 0.292      | -0.993         | 0.434           | 0.436 $\pm$ 0.252 | 0.086      | 0.577          | 0.106                 | 0.057 $\pm$ 0.122  | 0.642      | 0.068          | 0.666           |
|                                                        | MidFreq        | 0.623        | <b>0.041</b> | -0.022 $\pm$ 0.166      | 0.894        | ↓ 2.191   | 0.066          | 0.950               | -0.875 $\pm$ 0.892 | 0.328      | -1.186         | 0.476           | 0.500 $\pm$ 0.190 | 0.009      | 0.559          | 0.034                 | 0.046 $\pm$ 0.128  | 0.721      | 0.060          | 0.744           |
| TCS6                                                   | IniDur         | -0.135       | <b>0.018</b> | -0.602 $\pm$ 0.231      | <b>0.010</b> | ↓ 45.212  | -0.655         | 0.016               | -1.108 $\pm$ 0.639 | 0.085      | -0.958         | 0.192           | 0.933 $\pm$ 0.238 | <0.001     | 0.981          | 0.006                 | -0.057 $\pm$ 0.172 | 0.743      | -0.031         | 0.746           |
|                                                        | IniInt         | 0.059        | <b>0.031</b> | -0.994 $\pm$ 0.289      | <b>0.001</b> | ↓ 62.986  | -1.096         | 0.008               | -1.334 $\pm$ 0.726 | 0.068      | -1.300         | 0.114           | 0.931 $\pm$ 0.249 | <0.001     | 1.022          | 0.006                 | -0.117 $\pm$ 0.174 | 0.501      | -0.108         | 0.542           |
|                                                        | MidDur         | -0.142       | <b>0.024</b> | -0.515 $\pm$ 0.223      | <b>0.022</b> | ↓ 40.239  | -0.595         | 0.034               | -1.052 $\pm$ 0.641 | 0.102      | -0.930         | 0.216           | 0.870 $\pm$ 0.230 | <0.001     | 0.919          | 0.006                 | -0.036 $\pm$ 0.169 | 0.831      | -0.032         | 0.812           |
|                                                        | MidRise        | 0.070        | <b>0.027</b> | -0.497 $\pm$ 0.201      | <b>0.015</b> | ↓ 39.135  | -0.549         | 0.032               | -0.804 $\pm$ 0.680 | 0.239      | -0.721         | 0.434           | 0.836 $\pm$ 0.218 | <0.001     | 0.914          | 0.006                 | -0.031 $\pm$ 0.154 | 0.842      | -0.015         | 0.862           |
|                                                        | MidShape       | 0.444        | <b>0.025</b> | -0.021 $\pm$ 0.129      | 0.874        | ↓ 2.031   | -0.018         | 0.902               | -0.579 $\pm$ 0.791 | 0.466      | -0.635         | 0.608           | 0.564 $\pm$ 0.178 | 0.002      | 0.707          | 0.010                 | 0.001 $\pm$ 0.124  | 0.997      | -0.010         | 0.962           |
|                                                        | MidDuty        | 0.263        | <b>0.027</b> | 0.203 $\pm$ 0.151       | 0.180        | ↑ 22.459  | 0.215          | 0.178               | -0.827 $\pm$ 0.787 | 0.295      | -0.760         | 0.462           | 0.500 $\pm$ 0.191 | 0.010      | 0.595          | 0.006                 | -0.053 $\pm$ 0.138 | 0.703      | -0.109         | 0.652           |
|                                                        | MidRate        | -0.420       | <b>0.025</b> | 0.941 $\pm$ 0.277       | <b>0.001</b> | ↑ 156.288 | 0.988          | 0.008               | -1.349 $\pm$ 0.565 | 0.018      | -1.248         | 0.048           | 0.858 $\pm$ 0.234 | <0.001     | 0.869          | 0.008                 | -0.138 $\pm$ 0.186 | 0.460      | -0.117         | 0.502           |
|                                                        | IniPeak        | 0.463        | <b>0.023</b> | -0.254 $\pm$ 0.229      | 0.268        | ↓ 22.466  | -0.259         | 0.318               | -0.515 $\pm$ 0.782 | 0.511      | -0.593         | 0.598           | 0.363 $\pm$ 0.238 | 0.129      | 0.449          | 0.182                 | 0.028 $\pm$ 0.111  | 0.801      | 0.038          | 0.844           |
|                                                        | IniFreq        | 0.219        | <b>0.024</b> | 0.590 $\pm$ 0.219       | 0.008        | ↑ 80.424  | 0.740          | 0.034               | -1.127 $\pm$ 0.751 | 0.135      | -1.324         | 0.270           | 0.835 $\pm$ 0.233 | <0.001     | 0.940          | 0.010                 | -0.050 $\pm$ 0.162 | 0.758      | -0.053         | 0.728           |
|                                                        | MidPeak        | 0.485        | <b>0.025</b> | -0.148 $\pm$ 0.226      | 0.512        | ↓ 13.785  | -0.196         | 0.528               | -0.509 $\pm$ 0.785 | 0.518      | -0.480         | 0.638           | 0.429 $\pm$ 0.234 | 0.069      | 0.509          | 0.096                 | 0.009 $\pm$ 0.121  | 0.939      | 0.019          | 0.956           |
|                                                        | MidFreq        | 0.450        | <b>0.021</b> | 0.359 $\pm$ 0.182       | 0.050        | ↑ 43.135  | 0.425          | 0.070               | -0.739 $\pm$ 0.755 | 0.329      | -0.709         | 0.480           | 0.724 $\pm$ 0.197 | <0.001     | 0.875          | 0.008                 | -0.024 $\pm$ 0.142 | 0.868      | -0.029         | 0.846           |

\*BTSP are  $P$ -values estimated from bootstraps using a statistic derived from 1000 simulated data sets. See Ives and Garland (2010) Syst Biol 59:9-26.

Table S4 (Cont.) Standard and phylogenetic logistic regression analyses between discrete binary variables (TCS3, TCS4, ..., TCS8 for coloration conspicuousness and ability to sequester alkaloids) and continuous variables of call, body size (snout vent length, SVL), and external temperature.

| Phylogenetic Logistic Regression with Firth Correction |                |              |                    |                         |              |           |                |                    |                     |            |                |                    |                    |            |                |                    |                       |            |                |                 |
|--------------------------------------------------------|----------------|--------------|--------------------|-------------------------|--------------|-----------|----------------|--------------------|---------------------|------------|----------------|--------------------|--------------------|------------|----------------|--------------------|-----------------------|------------|----------------|-----------------|
| Binary Variables                                       | Call Variables | Phyl. Signal |                    | Call Variable ( $b_1$ ) |              |           |                |                    | Intercept ( $b_0$ ) |            |                |                    | SVL ( $b_2$ )      |            |                |                    | Temperature ( $b_3$ ) |            |                |                 |
|                                                        |                | $a$          | $P$ -value         | Value $\pm$ SE          | $P$ -value   | Odds %    | BTSP $\bar{X}$ | BTSP $P$ -value    | Value $\pm$ SE      | $P$ -value | BTSP $\bar{X}$ | BTSP $P$ -value    | Value $\pm$ SE     | $P$ -value | BTSP $\bar{X}$ | BTSP $P$ -value    | Value $\pm$ SE        | $P$ -value | BTSP $\bar{X}$ | BTSP $P$ -value |
| TCS7                                                   | IniDur         | -2.357       | 0.134              | -0.957 $\pm$ 0.327      | <b>0.004</b> | ↓ 61.604  | -0.909         | 0.006              | -2.456 $\pm$ 0.366  | <0.001     | -2.446         | 0.006              | -0.050 $\pm$ 0.291 | 0.864      | -0.012         | 0.872              | -0.331 $\pm$ 0.265    | 0.212      | -0.315         | 0.196           |
|                                                        | IniInt         | -2.580       | 0.147              | -0.858 $\pm$ 0.294      | <b>0.004</b> | ↓ 57.593  | -0.843         | 0.004              | -2.339 $\pm$ 0.335  | <0.001     | -2.242         | 0.008              | -0.152 $\pm$ 0.283 | 0.592      | -0.150         | 0.640              | -0.321 $\pm$ 0.259    | 0.217      | -0.317         | 0.198           |
|                                                        | MidDur         | -2.975       | 0.218              | -0.999 $\pm$ 0.310      | <b>0.002</b> | ↓ 63.173  | -0.988         | 0.006              | -2.435 $\pm$ 0.344  | <0.001     | -2.394         | <0.001             | -0.070 $\pm$ 0.274 | 0.797      | -0.070         | 0.812              | -0.250 $\pm$ 0.254    | 0.327      | -0.246         | 0.322           |
|                                                        | MidRise        | -2.488       | 0.159              | -1.326 $\pm$ 0.413      | <b>0.002</b> | ↓ 73.441  | -1.286         | 0.004              | -2.703 $\pm$ 0.425  | <0.001     | -2.609         | 0.006              | 0.013 $\pm$ 0.287  | 0.963      | -0.009         | 0.994              | -0.282 $\pm$ 0.259    | 0.277      | -0.263         | 0.308           |
|                                                        | MidShape       | -2.890       | 0.157              | -0.026 $\pm$ 0.247      | 0.916        | ↓ 2.570   | -0.033         | 0.946              | -2.096 $\pm$ 0.280  | <0.001     | -2.065         | <0.001             | -0.241 $\pm$ 0.287 | 0.401      | -0.217         | 0.472              | -0.199 $\pm$ 0.258    | 0.442      | -0.192         | 0.504           |
|                                                        | MidDuty        | -2.380       | 0.094              | 0.352 $\pm$ 0.266       | 0.187        | ↑ 42.172  | 0.355          | 0.206              | -2.159 $\pm$ 0.311  | <0.001     | -2.190         | 0.002              | -0.280 $\pm$ 0.303 | 0.357      | -0.247         | 0.358              | -0.343 $\pm$ 0.264    | 0.196      | -0.354         | 0.198           |
|                                                        | MidRate        | -2.698       | 0.136              | 0.768 $\pm$ 0.268       | <b>0.005</b> | ↑ 115.457 | 0.723          | 0.010              | -2.295 $\pm$ 0.321  | <0.001     | -2.346         | 0.012              | -0.160 $\pm$ 0.275 | 0.563      | -0.120         | 0.608              | -0.308 $\pm$ 0.255    | 0.229      | -0.308         | 0.190           |
|                                                        | IniPeak        | -3.341       | 0.304              | -0.847 $\pm$ 0.454      | 0.064        | ↓ 57.113  | -0.794         | 0.074              | -2.152 $\pm$ 0.281  | <0.001     | -2.114         | <0.001             | -1.027 $\pm$ 0.464 | 0.028      | -0.962         | 0.052              | -0.035 $\pm$ 0.252    | 0.888      | -0.015         | 0.942           |
|                                                        | IniFreq        | -2.606       | 0.129              | 0.593 $\pm$ 0.301       | 0.050        | ↑ 80.975  | 0.586          | 0.066              | -2.237 $\pm$ 0.315  | <0.001     | -2.266         | 0.004              | -0.168 $\pm$ 0.293 | 0.568      | -0.163         | 0.624              | -0.371 $\pm$ 0.289    | 0.200      | -0.357         | 0.246           |
|                                                        | MidPeak        | -3.450       | 0.335              | -0.697 $\pm$ 0.432      | 0.109        | ↓ 50.191  | -0.653         | 0.128              | -2.130 $\pm$ 0.275  | <0.001     | -2.073         | 0.004              | -0.909 $\pm$ 0.450 | 0.045      | -0.849         | 0.074              | -0.039 $\pm$ 0.251    | 0.876      | -0.022         | 0.924           |
| TCS8                                                   | MidFreq        | -2.462       | 0.120              | 0.485 $\pm$ 0.314       | 0.124        | ↑ 62.390  | 0.423          | 0.122              | -2.209 $\pm$ 0.316  | <0.001     | -2.308         | 0.008              | -0.167 $\pm$ 0.305 | 0.583      | -0.197         | 0.626              | -0.381 $\pm$ 0.292    | 0.194      | -0.361         | 0.232           |
|                                                        | IniDur         | -2.723       | 0.150              | -0.911 $\pm$ 0.376      | <b>0.016</b> | ↓ 59.799  | -0.875         | 0.036              | -2.884 $\pm$ 0.422  | <0.001     | -3.000         | 0.008              | -0.032 $\pm$ 0.330 | 0.924      | -0.005         | 0.986              | -0.210 $\pm$ 0.306    | 0.493      | -0.198         | 0.532           |
|                                                        | IniInt         | -3.279       | 0.293              | -0.806 $\pm$ 0.336      | <b>0.017</b> | ↓ 55.352  | -0.758         | 0.020              | -2.792 $\pm$ 0.382  | <0.001     | -2.705         | <0.001             | -0.159 $\pm$ 0.323 | 0.624      | -0.134         | 0.738              | -0.179 $\pm$ 0.300    | 0.553      | -0.155         | 0.594           |
|                                                        | MidDur         | -3.419       | 0.320              | -1.011 $\pm$ 0.367      | <b>0.007</b> | ↓ 63.611  | -0.959         | 0.018              | -2.944 $\pm$ 0.420  | <0.001     | -2.840         | 0.010              | -0.061 $\pm$ 0.316 | 0.847      | -0.018         | 0.931              | -0.163 $\pm$ 0.297    | 0.583      | -0.156         | 0.607           |
|                                                        | MidRise        | -3.096       | 0.225              | -1.283 $\pm$ 0.476      | <b>0.008</b> | ↓ 72.282  | -1.276         | 0.014              | -3.122 $\pm$ 0.490  | <0.001     | -3.607         | 0.008              | 0.011 $\pm$ 0.321  | 0.973      | 0.009          | 0.893              | -0.166 $\pm$ 0.297    | 0.575      | -0.230         | 0.565           |
|                                                        | MidShape       | -3.167       | 0.192              | -0.128 $\pm$ 0.301      | 0.671        | ↓ 12.008  | -0.118         | 0.718              | -2.551 $\pm$ 0.328  | <0.001     | -2.696         | 0.002              | -0.240 $\pm$ 0.339 | 0.480      | -0.147         | 0.620              | -0.064 $\pm$ 0.311    | 0.837      | -0.034         | 0.878           |
|                                                        | MidDuty        | -3.160       | 0.224              | 0.352 $\pm$ 0.310       | 0.258        | ↑ 42.195  | 0.381          | 0.302              | -2.572 $\pm$ 0.334  | <0.001     | -2.618         | 0.004              | -0.328 $\pm$ 0.341 | 0.337      | -0.274         | 0.430              | -0.161 $\pm$ 0.309    | 0.602      | -0.137         | 0.616           |
|                                                        | MidRate        | -3.401       | 0.313              | 0.733 $\pm$ 0.305       | <b>0.017</b> | ↑ 108.077 | 0.726          | 0.036              | -2.768 $\pm$ 0.371  | <0.001     | -2.814         | 0.002              | -0.180 $\pm$ 0.317 | 0.570      | -0.175         | 0.674              | -0.168 $\pm$ 0.296    | 0.571      | -0.145         | 0.574           |
|                                                        | IniPeak        | -3.659       | 0.382              | -0.913 $\pm$ 0.536      | 0.091        | ↑ 59.881  | -0.881         | 0.104              | -2.646 $\pm$ 0.340  | <0.001     | -2.893         | <0.001             | -1.090 $\pm$ 0.545 | 0.047      | -0.990         | 0.074              | 0.045 $\pm$ 0.300     | 0.881      | 0.062          | 0.880           |
|                                                        | IniFreq        | -3.583       | 0.358              | 0.347 $\pm$ 0.335       | 0.302        | ↑ 41.513  | 0.311          | 0.332              | -2.573 $\pm$ 0.326  | <0.001     | -2.566         | <0.001             | -0.213 $\pm$ 0.333 | 0.523      | -0.186         | 0.607              | -0.129 $\pm$ 0.326    | 0.693      | -0.143         | 0.755           |
| MidPeak                                                | -3.616         | 0.370        | -0.822 $\pm$ 0.509 | 0.108                   | ↓ 56.062     | -0.714    | 0.136          | -2.634 $\pm$ 0.337 | <0.001              | -2.727     | 0.002          | -1.010 $\pm$ 0.526 | 0.057              | -0.953     | 0.078          | 0.034 $\pm$ 0.300  | 0.910                 | 0.027      | 0.901          |                 |
| MidFreq                                                | -3.469         | 0.297        | 0.085 $\pm$ 0.341  | 0.803                   | ↑ 8.885      | 0.043     | 0.870          | -2.535 $\pm$ 0.318 | <0.001              | -2.752     | 0.002          | -0.257 $\pm$ 0.344 | 0.456              | -0.258     | 0.552          | -0.078 $\pm$ 0.327 | 0.812                 | -0.080     | 0.806          |                 |

\*BTSP are  $P$ -values estimated from bootstraps using a statistic derived from 1000 simulated data sets. See Ives and Garland (2010) Syst Biol 59:9-26.

Table S4 (Cont.) Phylogenetic regression analyses between continuous scoring of coloration (Total Contrast Score or  $\Sigma S_i$ ) and call, body size (snout vent length, SVL), external temperature, and principal components.

| Dependent Conspicuousness (Total Contrast Score $\Sigma S_i$ ) |          |                 | Call Variable ( $b_1$ ) |                 | Intercept ( $b_0$ ) |                 | SVL ( $b_2$ )        |                 | Temperature ( $b_3$ ) |                 |                       |                 |
|----------------------------------------------------------------|----------|-----------------|-------------------------|-----------------|---------------------|-----------------|----------------------|-----------------|-----------------------|-----------------|-----------------------|-----------------|
| Call Variable                                                  | <i>N</i> | $\lambda^a$     | $\beta_1 \pm SE$        | <i>P</i> -value | $\beta_0 \pm SE$    | <i>P</i> -value | $\beta_2 \pm SE$     | <i>P</i> -value | $\beta_3 \pm SE$      | <i>P</i> -value | <i>R</i> <sup>2</sup> | <i>P</i> -value |
| Initial Pulse-Note Duration (IniDur)                           | 169      | <b>0.780***</b> | <b>-4.668 ± 2.059</b>   | <b>0.025</b>    | -1.291 ± 2.428      | 0.596           | <b>2.796 ± 1.368</b> | <b>0.043</b>    | -1.648 ± 1.430        | 0.251           | <b>0.051</b>          | <b>0.021</b>    |
| Interval between Initial Pulse-Notes (IniInt)                  | 169      | <b>0.775***</b> | <b>-0.292 ± 0.118</b>   | <b>0.015</b>    | -2.243 ± 2.477      | 0.367           | 2.074 ± 1.323        | 0.119           | -2.042 ± 1.448        | 0.160           | <b>0.056</b>          | <b>0.012</b>    |
| Middle Pulse-Note Duration (MidDur)                            | 169      | <b>0.782***</b> | <b>-4.434 ± 2.014</b>   | <b>0.029</b>    | -1.430 ± 2.435      | 0.558           | <b>2.878 ± 1.381</b> | <b>0.039</b>    | -1.646 ± 1.430        | 0.251           | <b>0.050</b>          | <b>0.024</b>    |
| Interval between Middle Pulse-Notes (MidInt)                   | 169      | <b>0.779***</b> | <b>-0.300 ± 0.128</b>   | <b>0.020</b>    | -2.129 ± 2.474      | 0.391           | 2.030 ± 1.326        | 0.128           | -1.964 ± 1.443        | 0.176           | <b>0.053</b>          | <b>0.017</b>    |
| Middle Pulse-Note Rise Time (MidRise)                          | 168      | <b>0.774***</b> | <b>-6.550 ± 2.603</b>   | <b>0.013</b>    | -1.210 ± 2.405      | 0.615           | <b>3.029 ± 1.358</b> | <b>0.027</b>    | -1.240 ± 1.422        | 0.384           | <b>0.059</b>          | <b>0.011</b>    |
| Middle Pulse-Note Shape (MidShape)                             | 168      | <b>0.797***</b> | -1.132 ± 1.007          | 0.263           | -0.345 ± 2.551      | 0.893           | 2.107 ± 1.351        | 0.121           | -1.477 ± 1.442        | 0.307           | 0.030                 | 0.149           |
| Middle Pulse-Note Duty (MidDuty)                               | 168      | <b>0.793***</b> | 1.085 ± 0.728           | 0.138           | -1.529 ± 2.467      | 0.536           | 1.677 ± 1.384        | 0.227           | -1.822 ± 1.453        | 0.212           | 0.037                 | 0.085           |
| Middle Pulse-Note Rate (MidRate)                               | 169      | <b>0.779***</b> | <b>0.593 ± 0.251</b>    | <b>0.019</b>    | -2.118 ± 2.472      | 0.393           | 2.067 ± 1.325        | 0.121           | -1.934 ± 1.441        | 0.181           | <b>0.054</b>          | <b>0.016</b>    |
| Initial Q1 (IniQ1)                                             | 169      | <b>0.816***</b> | <b>-0.529 ± 0.230</b>   | <b>0.023</b>    | 6.269 ± 4.086       | 0.127           | -1.537 ± 2.058       | 0.456           | -1.177 ± 1.428        | 0.411           | <b>0.055</b>          | <b>0.014</b>    |
| Initial Peak Frequency (IniPeak)                               | 169      | <b>0.815***</b> | <b>-0.516 ± 0.232</b>   | <b>0.027</b>    | 6.335 ± 4.194       | 0.133           | -1.518 ± 2.091       | 0.469           | -1.107 ± 1.436        | 0.442           | <b>0.053</b>          | <b>0.017</b>    |
| Initial Q3 (IniQ3)                                             | 169      | <b>0.816***</b> | <b>-0.479 ± 0.226</b>   | <b>0.035</b>    | 5.827 ± 4.144       | 0.162           | -1.253 ± 2.058       | 0.543           | -1.142 ± 1.437        | 0.428           | <b>0.051</b>          | <b>0.022</b>    |
| Initial Modulation Q1 – Q3 (IniFreq)                           | 169      | <b>0.796***</b> | 0.269 ± 0.531           | 0.613           | -1.877 ± 2.918      | 0.521           | 2.112 ± 1.353        | 0.120           | -1.657 ± 1.455        | 0.256           | 0.025                 | 0.241           |
| Middle Q1 (MidQ1)                                              | 169      | <b>0.813***</b> | -0.402 ± 0.218          | 0.067           | 4.382 ± 3.911       | 0.264           | -0.639 ± 1.985       | 0.748           | -1.358 ± 1.430        | 0.344           | <b>0.044</b>          | <b>0.041</b>    |
| Middle Peak Frequency (MidPeak)                                | 168      | <b>0.817***</b> | <b>-0.436 ± 0.218</b>   | <b>0.047</b>    | 4.427 ± 3.979       | 0.267           | -0.609 ± 1.987       | 0.759           | -1.469 ± 1.420        | 0.302           | <b>0.055</b>          | <b>0.015</b>    |
| Middle Q3 (MidQ3)                                              | 169      | <b>0.812***</b> | -0.380 ± 0.219          | 0.084           | 4.392 ± 4.062       | 0.281           | -0.556 ± 2.019       | 0.783           | -1.246 ± 1.442        | 0.389           | 0.042                 | 0.051           |
| Middle Modulation Q1 – Q3 (MidFreq)                            | 169      | <b>0.799***</b> | 0.097 ± 0.558           | 0.862           | -1.426 ± 3.075      | 0.643           | 2.090 ± 1.364        | 0.127           | -1.623 ± 1.472        | 0.272           | 0.023                 | 0.265           |

| Dependent Continuous                                 | <i>N</i> | $\lambda^a$     | Intercept            |                  | PC1- Morphology       |                 | PC2- Physiology       |                 | PC3- Environment |                 | Overall               |                 |
|------------------------------------------------------|----------|-----------------|----------------------|------------------|-----------------------|-----------------|-----------------------|-----------------|------------------|-----------------|-----------------------|-----------------|
| Conspicuousness (Total Contrast Score $\Sigma S_i$ ) | 169      | <b>0.785***</b> | $\beta_0 \pm SE$     | <i>P</i> -value  | $\beta_1 \pm SE$      | <i>P</i> -value | $\beta_2 \pm SE$      | <i>P</i> -value | $\beta_3 \pm SE$ | <i>P</i> -value | <i>R</i> <sup>2</sup> | <i>P</i> -value |
|                                                      |          |                 | <b>3.531 ± 0.677</b> | <b>&lt;0.001</b> | <b>-0.373 ± 0.137</b> | <b>0.007</b>    | <b>-0.370 ± 0.156</b> | <b>0.019</b>    | -0.025 ± 0.145   | 0.861           | <b>0.076</b>          | <b>0.002</b>    |

<sup>a</sup> Significance of rejecting  $H_0: \lambda = 0$  (no phylogenetic signal). Significance is given by <sup>NS</sup>,  $P > 0.05$ ; \*,  $P < 0.05$ ; \*\*,  $P < 0.01$ ; \*\*\*,  $P < 0.001$ .
